# Supplementary material for: Coprophagy Prevention Affects the Reproductive Performance in New Zealand White Rabbits Is Mediated through Nox4-ROS-NFκB Pathway
Source: Oxid Med Cell Longev. 2022 Dec 21;2022:8999899. doi: 10.1155/2022/8999899 (PMC11401658; doi:10.1155/2022/8999899)
Supplement: Supplementary Materials — Supplementary Figure S1: quality and accuracy analysis of transcriptome sequencing data. (A) Expression patterns of all genes in the sample. (B) Correlation of gene expression levels between samples. (C) Principal component analysis results of all samples. Supplementary Figure S2: verification of the accuracy of transcriptome sequencing results. (A) RT-qPCR results. (B) Differential multiples of gene expression in transcriptome sequencing. Supplementary Table S1: the diet composition of rabbits. Supplementary Table S2: the primers for RT-qPCR. Supplementary Table S3: RT-qPCR system and procedure. Supplementary Table S4: transcriptome sequencing data output report. Supplementary Table S5: analysis of differentially expressed genes. Supplementary Table S6: enrichment analysis of GO Terms. Supplementary Table S7: enrichment analysis of KEGG metabolic pathway. [file 8999899.f1.zip › Supplementary Table S5 (1).txt]

id	baseMean	baseMean_X	baseMean_J	foldChange(J/X)(J/X)	log2FoldChange	pval	padj	Chromosome	Start Site	End Site	Direction	Length	Name	GO	KEGG	EC	eggNOG Class	eggNOG	Description	Entrez_geneID	UniProtAC
ENSOCUG00000029112	23295.26478	200.5737277	46389.95583	231.2863024	7.853536017	1.29338E-83	2.19977E-79	MT	11772	13583	+	1812	ND5	GO:0003954;GO:0005739;GO:0005743;GO:0005747;GO:0008137;GO:0008137;GO:0008137;GO:0016020;GO:0016021;GO:0042773;GO:0042773;GO:0055114;GO:0055114;GO:0055114;GO:0070469;	-	-	C	0VA34;09Z7N;0UTZV;KOG4668;0DRJV;1B7J9;12RS9;1D0T2	NADH dehydrogenase subunit 5 [Source:NCBI gene;Acc:808224]	-	-
ENSOCUG00000029099	33319.62895	307.3401567	66331.91774	215.8257432	7.753723146	1.85395E-82	1.5766E-78	MT	7039	7722	+	684	COX2	GO:0004129;GO:0004129;GO:0004129;GO:0004129;GO:0005507;GO:0005507;GO:0005739;GO:0005739;GO:0005739;GO:0005743;GO:0005743;GO:0016020;GO:0016020;GO:0016020;GO:0016021;GO:0016021;GO:0016021;GO:0016491;GO:0016491;GO:0022900;GO:0022900;GO:0045277;GO:0045277;GO:0046872;GO:0055114;GO:0070469;GO:1902600;	-	-	C	0VF6H;KOG4767;0UHB3;0A4BK;1B2XD;0DQRC;1CT8H;12SSU	cytochrome c oxidase subunit II [Source:NCBI gene;Acc:808233]	-	-
ENSOCUG00000029105	2381.749806	23.35201358	4740.147599	202.9866754	7.665241218	2.1189E-74	1.20128E-70	MT	9491	9837	+	347	ND3	GO:0005739;GO:0005747;GO:0008137;GO:0008137;GO:0008137;GO:0016020;GO:0016021;GO:0031966;GO:0055114;GO:0055114;GO:0055114;GO:0070469;	-	-	C	0DV7P;1D4JN;13T5B;0UVYU;0A8V9;KOG4662;1B6P8;0VJRM	NADH dehydrogenase subunit 3 [Source:NCBI gene;Acc:808221]	-	-
ENSOCUG00000032540	1191.903207	2370.334011	13.47240254	0.005683757	-7.458939407	8.86983E-66	3.77145E-62	AAGW02081404	13428	13996	-	336	-	-	-	-	-	-	-	-	-
ENSOCUG00000029108	15195.29756	554.5858879	29836.00923	53.79871699	5.749499862	4.66481E-55	1.58678E-51	MT	10196	11573	+	1378	ND4	GO:0005739;GO:0005747;GO:0006120;GO:0006120;GO:0008137;GO:0008137;GO:0008137;GO:0016020;GO:0016021;GO:0031966;GO:0042773;GO:0042773;GO:0055114;GO:0055114;GO:0055114;GO:0070469;	-	-	C	KOG4845;0DN5N;1B4DJ;134PK;0VBEQ;1CX26;0UIM1;0A0IK	NADH dehydrogenase subunit 4 [Source:NCBI gene;Acc:808225]	-	-
ENSOCUG00000029115	28119.9336	246.9009598	55992.96624	226.7831048	7.825169354	4.22807E-50	1.19852E-46	MT	14175	15313	+	1139	CYTB	GO:0005739;GO:0005739;GO:0005743;GO:0006122;GO:0006122;GO:0008121;GO:0008121;GO:0009055;GO:0009055;GO:0016020;GO:0016020;GO:0016020;GO:0016020;GO:0016021;GO:0016491;GO:0016491;GO:0022904;GO:0022904;GO:0031305;GO:0045275;GO:0045275;GO:0046872;GO:0055114;GO:0070469;	-	-	C	0A1VS;0DPHX;0VCRC;KOG4663;0UT93;1CYGF;1AW1U;13AUK	cytochrome b [Source:NCBI gene;Acc:808227]	-	-
ENSOCUG00000013331	297.5307671	6.932074396	588.1294598	84.84176976	6.40670281	2.21703E-43	5.38676E-40	X	61956423	61957025	+	465	-	GO:0004601;GO:0004602;GO:0004602;GO:0006979;GO:0006979;GO:0016491;GO:0055114;GO:0055114;GO:0055114;GO:0098869;	-	-	O	1CV9V;1B5R4;KOG1651;0UTIQ;0DPBV;0VE3N;0A38X;138EJ	-	-	-
ENSOCUG00000029107	395.8552001	13.16031516	778.550085	59.15892406	5.886523909	3.84548E-43	8.17548E-40	MT	9906	10202	+	297	ND4L	GO:0005739;GO:0008137;GO:0016020;GO:0016021;GO:0016651;GO:0016651;GO:0031966;GO:0042773;GO:0042773;GO:0042773;GO:0055114;GO:0055114;GO:0055114;GO:0070469;	-	-	C	0UW7V;0A9B7;1D555;KOG4669;0VKRH;1B6MX;13VC2;0DVUW	NADH dehydrogenase subunit 4L [Source:NCBI gene;Acc:808222]	-	-
ENSOCUG00000029102	21879.75682	233.4707031	43526.04295	186.4304273	7.542493531	2.85585E-36	5.39693E-33	MT	7957	8636	+	680	ATP6	GO:0005739;GO:0005743;GO:0005753;GO:0006754;GO:0006811;GO:0015078;GO:0015078;GO:0015986;GO:0015986;GO:0016020;GO:0016021;GO:0045263;GO:0045263;GO:0045263;	-	-	C	0A4QK;0DSI2;KOG4665;1D1U6;1B3V3;0UU9V;0VFZE;13N3J	ATP synthase F0 subunit 6 [Source:NCBI gene;Acc:808232]	-	-
ENSOCUG00000029103	29959.90178	473.9934823	59445.81007	125.4148259	6.970564096	5.65196E-36	9.61285E-33	MT	8637	9420	+	784	COX3	GO:0004129;GO:0004129;GO:0005739;GO:0005743;GO:0008535;GO:0008535;GO:0015002;GO:0015002;GO:0016020;GO:0016020;GO:0016020;GO:0016021;GO:0019646;GO:0019646;GO:0022904;GO:0022904;GO:0045277;GO:0045277;GO:1902600;	-	-	C	0A1BF;KOG4664;0DNZ2;13KX0;1CXWG;1AU5U;0UIYW;0VC6H	cytochrome c oxidase subunit III [Source:NCBI gene;Acc:808229]	-	-
ENSOCUG00000029113	5276.291223	783.0078638	9769.574582	12.47698144	3.641197039	1.05989E-27	1.63878E-24	MT	13579	14103	-	525	ND6	GO:0005739;GO:0008137;GO:0008137;GO:0008137;GO:0016020;GO:0016021;GO:0031966;GO:0055114;GO:0055114;GO:0055114;GO:0070469;	-	-	C	1D3MF;0DU9N;0UVFF;0A7GS;0IYM9;1B69Y;13SJT;0VIBQ	NADH dehydrogenase subunit 6 [Source:NCBI gene;Acc:808223]	-	-
ENSOCUG00000002574	1296.382178	391.8881489	2200.876207	5.61608258	2.489564149	2.08661E-14	2.95743E-11	10	40174751	40187933	+	2223	STEAP4	GO:0005654;GO:0005886;GO:0009055;GO:0016020;GO:0016021;GO:0016021;GO:0020037;GO:0022900;GO:0052851;GO:0055114;GO:0070207;GO:0071949;	K19876	EC:1.16.1.-	S;P	0V5Z3;09UZ9;0IF4F;0DG8T;12Q82;1B2SZ;0UKRS;1CT19	STEAP4 metalloreductase [Source:HGNC Symbol;Acc:HGNC:21923]	100353852	G1SHU3
ENSOCUG00000025982	4779.786004	9340.606907	218.9651017	0.023442278	-5.414743434	1.29681E-13	1.69662E-10	AAGW02081404	24130	24426	-	297	-	GO:0016020;GO:0016021;GO:0016651;GO:0016651;GO:0042773;GO:0042773;GO:0055114;GO:0055114;	-	-	C	0UW7V;0A9B7;1D555;KOG4669;0VKRH;1B6MX;13VC2;0DVUW	-	-	-
ENSOCUG00000004588	3880.684102	1348.709062	6412.659141	4.75466453	2.249343554	7.48512E-13	9.09335E-10	X	49697184	49698688	+	1505	GJB1	GO:0005737;GO:0005886;GO:0005886;GO:0005921;GO:0005921;GO:0005922;GO:0005922;GO:0007154;GO:0007154;GO:0016020;GO:0016021;GO:0030054;	K07620	-	W;T	0UT3R;12R0F;1CUES;0DJMX;1B3PW;0IFM8;09Y6S;0V7CT	Oryctolagus cuniculus gap junction protein beta 1 (GJB1), mRNA. [Source:RefSeq mRNA;Acc:NM_001198960]	100008934	-
ENSOCUG00000025149	344.5508582	563.930457	125.1712595	0.221962226	-2.171613919	1.5759E-10	1.78686E-07	2	169530544	169540585	+	2284	-	GO:0003333;GO:0006865;GO:0015171;GO:0016020;GO:0016020;GO:0016020;GO:0016021;GO:0022857;GO:0022857;GO:0032991;GO:0055085;GO:0055085;	-	-	E	12P2T;09V1W;0UQDU;1AWE2;0DGB9;0V61J;1CR0R;KOG1287	-	-	-
ENSOCUG00000006139	269.8378729	450.7657779	88.90996786	0.197242054	-2.341960914	2.17515E-10	2.31218E-07	14	96165950	96202713	+	3744	SEMA5B	GO:0005515;GO:0016020;GO:0016021;GO:0030215;GO:0030215;GO:0048675;GO:0050908;GO:0097485;GO:1990138;GO:0005515;GO:0030215;GO:0005515;GO:0030215;	K06841	-	W;T	0UH2P;1CRJ2;1B1DF;0DGUX;0V6JI;09VKC;12T02;KOG3611	semaphorin 5B [Source:HGNC Symbol;Acc:HGNC:10737]	100354300	-
ENSOCUG00000034585	59.30653244	116.3780082	2.235056693	0.019205146	-5.702363223	7.15019E-10	7.15356E-07	AAGW02081404	14629	14703	-	75	-	-	-	-	-	-	-	-	-
ENSOCUG00000023218	25511.43675	41450.12391	9572.749588	0.230946224	-2.114371139	3.0277E-09	2.86084E-06	16	47873870	47877908	-	1939	-	GO:0005125;GO:0005160;GO:0005160;GO:0005576;GO:0005615;GO:0007165;GO:0007275;GO:0008083;GO:0008083;GO:0008083;GO:0005160;GO:0008083;	K04668	-	T	0DGSI;09VHX;0V6H6;13IV4;1AWQD;KOG3900;1CRGM;0UINN	-	100101568	G1TVA9
ENSOCUG00000038200	2081.817168	3289.610758	874.0235775	0.265692096	-1.912172785	3.346E-09	2.9952E-06	AAGW02081404	25695	25958	-	264	-	GO:0015078;GO:0015986;GO:0045263;	-	-	-	-	-	-	-
ENSOCUG00000022735	26.0127994	49.96322976	2.062369035	0.041277737	-4.598492326	1.06436E-08	9.05134E-06	2	56640242	56640496	-	255	-	GO:0003735;GO:0003735;GO:0005840;GO:0005840;GO:0005840;GO:0006412;GO:0006412;GO:0046872;	K02978	-	J	0VJ41;KOG1779;0A88C;1B6BZ;1D45G;0UVW1;0DUUM;13UE8	-	100339454	G1TWZ0
ENSOCUG00000016942	1008.004871	1576.857346	439.1523967	0.278498494	-1.844258567	1.57056E-08	1.272E-05	17	14307858	14432863	+	1979	ALDH1A2	GO:0016491;GO:0016620;GO:0055114;GO:0016491;GO:0016620;GO:0055114;GO:0001568;GO:0001758;GO:0001758;GO:0001936;GO:0002138;GO:0003007;GO:0004028;GO:0005737;GO:0008284;GO:0008285;GO:0009855;GO:0009952;GO:0009954;GO:0010628;GO:0014032;GO:0016331;GO:0016491;GO:0016491;GO:0016491;GO:0016620;GO:0016620;GO:0021915;GO:0030182;GO:0030324;GO:0030326;GO:0030900;GO:0030902;GO:0031016;GO:0031076;GO:0034097;GO:…	K07249	EC:1.2.1.36	C	1ART2;1CPKC;0V4J5;09TK5;0DEWU;12PWF;0UFZ4;KOG2450	aldehyde dehydrogenase 1 family member A2 [Source:HGNC Symbol;Acc:HGNC:15472]	100339014	-
ENSOCUG00000013064	510.4664607	792.3673913	228.56553	0.288459031	-1.793561663	4.08422E-08	3.15747E-05	17	9436496	9826281	-	8372	TLN2	GO:0001726;GO:0001726;GO:0003779;GO:0003779;GO:0005200;GO:0005200;GO:0005623;GO:0005856;GO:0005856;GO:0005925;GO:0005925;GO:0007016;GO:0007016;GO:0007155;GO:0007155;GO:0051015;GO:0051015;GO:0006897;GO:0007155;GO:0030276;GO:0051015;	K06271	-	Z	KOG4261;09VZ3;0DH7V;1B1IK;0V6XH;1CRY0;12PK1;0UJA1	talin 2 [Source:HGNC Symbol;Acc:HGNC:15447]	100354375	-
ENSOCUG00000000098	1601.438764	706.9828192	2495.894708	3.530347047	1.819810013	7.58464E-08	5.60867E-05	12	98826732	98960764	+	1539	SLC16A10	GO:0005887;GO:0005887;GO:0006590;GO:0015173;GO:0015173;GO:0015349;GO:0015349;GO:0015801;GO:0016020;GO:0016021;GO:0030054;GO:0043231;GO:0055085;GO:0055085;GO:0070327;GO:0070460;	K08187	-	P;G	0B38D;1DEJJ;1BANY;0V2PT;0IMVX;13B4N;0WFKF;0E7J1	solute carrier family 16 member 10 [Source:HGNC Symbol;Acc:HGNC:17027]	100101617	-
ENSOCUG00000009223	110.6265833	206.9343003	14.31886637	0.069195229	-3.853183615	8.75485E-08	6.20427E-05	GL018712	1875764	2033737	-	1821	DOK5	-	K24037	-	T	0V4ID;1CPJP;0UFY5;13HR0;0DEW3;1ARSD;09TJD;KOG4047	docking protein 5 [Source:HGNC Symbol;Acc:HGNC:16173]	100346665	G1TNF4
ENSOCUG00000013016	58.95574424	102.7042743	15.20721418	0.148067978	-2.75566843	1.12558E-07	7.65755E-05	9	91296575	91348778	+	3482	MAPK4	GO:0000165;GO:0004672;GO:0004672;GO:0004707;GO:0004707;GO:0005524;GO:0005524;GO:0005634;GO:0005737;GO:0006468;GO:0006468;GO:0019901;GO:0042803;GO:0046982;GO:0004672;GO:0004707;GO:0005524;GO:0006468;	K06855	EC:2.7.11.24	T	1CU2T;0DJAN;1AWXR;0US48;09XXI;KOG0660;0V8VA;12QSB	mitogen-activated protein kinase 4 [Source:HGNC Symbol;Acc:HGNC:6878]	100343055	-
ENSOCUG00000005986	132.4293729	214.4999777	50.35876797	0.234772835	-2.090662605	1.19031E-07	7.78648E-05	GL018731	1609190	1613379	-	828	-	GO:0000400;GO:0003677;GO:0003677;GO:0003677;GO:0005634;GO:0005634;GO:0005634;GO:0008301;GO:0032392;	K11296	-	K	0V7Y0;12UAK;0DIAD;1AYGD;KOG0381;1CT0T;09WZY;0UKR8	-	100353572	-
ENSOCUG00000013971	6716.526972	3281.515283	10151.53866	3.093552151	1.629264355	6.25299E-07	0.000388406	7	141217000	141288454	+	4228	AOX1	GO:0004031;GO:0005506;GO:0005506;GO:0005829;GO:0009055;GO:0016491;GO:0017144;GO:0042802;GO:0042803;GO:0043546;GO:0046872;GO:0050660;GO:0050660;GO:0051287;GO:0051536;GO:0051537;GO:0051537;GO:0055114;GO:0055114;GO:0071949;GO:0005506;GO:0005506;GO:0009055;GO:0009055;GO:0016491;GO:0016491;GO:0022900;GO:0046872;GO:0046872;GO:0046872;GO:0050660;GO:0050660;GO:0051287;GO:0051536;GO:0051536;GO:0051536;GO:…	K00157	EC:1.2.3.1	F	09X8X;0DI1X;KOG0430;1CTYV;12QCG;1ASSK;0UH3U;0V8S8	aldehyde oxidase 1 [Source:HGNC Symbol;Acc:HGNC:553]	100008601	P80456
ENSOCUG00000012831	111.2251015	32.33625285	190.1139501	5.879282026	2.555639985	6.39427E-07	0.000388406	GL019541	2964	6504	-	1299	IGFBP1	GO:0005520;GO:0005520;GO:0005576;GO:0005576;GO:0005794;GO:0031994;GO:0031995;	K23578	-	T	0US5U;0A16I;0DNU7;1ASTH;13MNZ;1CXRI;0IITJ;0VC2D	insulin like growth factor binding protein 1 [Source:HGNC Symbol;Acc:HGNC:5469]	100349817	G1T457
ENSOCUG00000016524	435.9518373	218.8874801	653.0161945	2.983341917	1.576929333	2.13578E-06	0.001252598	14	161234855	161447396	-	6476	TIAM1	GO:0005085;GO:0005085;GO:0005085;GO:0005089;GO:0005515;GO:0005829;GO:0005886;GO:0005911;GO:0007160;GO:0007165;GO:0007165;GO:0008284;GO:0010717;GO:0016477;GO:0016601;GO:0019900;GO:0030335;GO:0030676;GO:0031234;GO:0032092;GO:0034622;GO:0035023;GO:0035556;GO:0035556;GO:0044291;GO:0090630;GO:0090630;GO:0090630;GO:0005085;GO:0005089;GO:0005515;GO:0007165;GO:0035023;GO:0035556;GO:0090630;GO:0005085;GO:…	-	-	W;T	0E9K2;0V3XF;1DGF1;13G75;0WJ7G;1BBJT;0ITS1;0B6GZ	TIAM Rac1 associated GEF 1 [Source:HGNC Symbol;Acc:HGNC:11805]	100338333	G1TBU5
ENSOCUG00000015621	1765.858258	856.7025678	2675.013949	3.122453521	1.642680097	2.38746E-06	0.001353529	GL018743	1018595	1056974	-	2047	GPT2	GO:0003824;GO:0003824;GO:0004021;GO:0006103;GO:0009058;GO:0009058;GO:0030170;GO:0030170;GO:0042851;	K00814	EC:2.6.1.2	E	1CSIX;0UFQ1;KOG0258;0DHUE;09WYD;0V7Y4;1ARJD;12PIT	glutamic--pyruvic transaminase 2 [Source:HGNC Symbol;Acc:HGNC:18062]	100352457	-
ENSOCUG00000013593	750.6929469	320.9052196	1180.480674	3.678596053	1.879155263	3.47268E-06	0.001905268	4	2037651	2060936	-	2803	BPI	GO:0001530;GO:0001530;GO:0001530;GO:0005615;GO:0005615;GO:0006955;GO:0006955;GO:0008289;GO:0008289;GO:0032715;GO:0032717;GO:0032720;GO:0043031;GO:0050829;GO:0050829;GO:0001530;GO:0006955;GO:0008289;GO:0050829;GO:0001530;GO:0005615;GO:0006955;GO:0008289;GO:0050829;	-	-	V	0DJ1E;09XPP;1CTSY;0V8MD;0UMQ6;13IC6;1B51A;KOG4160	bactericidal permeability increasing protein [Source:HGNC Symbol;Acc:HGNC:1095]	100009228	G1T5Q9
ENSOCUG00000017233	379.7178008	566.4905914	192.9450102	0.340597025	-1.55386226	3.74179E-06	0.001988762	12	10824319	10824984	+	666	H1-3	GO:0000786;GO:0000786;GO:0000790;GO:0003677;GO:0003677;GO:0003677;GO:0005634;GO:0005634;GO:0005634;GO:0005694;GO:0005719;GO:0006334;GO:0006334;GO:0031490;	K11275	-	B	0VJ3T;1B7WQ;1D456;0A883;0DUU7;0UVSR;14304;KOG4012	H1.3 linker histone, cluster member [Source:HGNC Symbol;Acc:HGNC:4717]	100344156	G1U7C6
ENSOCUG00000003423	24.47146421	44.46961109	4.473317333	0.100592679	-3.313402777	6.9272E-06	0.003570236	GL018714	113375	123044	-	1872	SDR9C7	GO:0004745;GO:0004745;GO:0004745;GO:0016491;GO:0016491;GO:0055114;	-	-	Q	0UMP8;1CPJA;13H77;KOG1610;0V4HX;1AX5K;09TJ0;0DEVP	short chain dehydrogenase/reductase family 9C member 7 [Source:HGNC Symbol;Acc:HGNC:29958]	103352251	G1SJP1
ENSOCUG00000009395	370.5858955	121.8957453	619.2760457	5.08037458	2.344934872	7.46241E-06	0.003732959	8	4836356	5065616	-	5235	CNTN1	GO:0005515;GO:0007399;GO:0007399;GO:0010628;GO:0010765;GO:0010976;GO:0021549;GO:0030246;GO:0031175;GO:0031175;GO:0031175;GO:0099025;GO:0099026;GO:0005515;GO:0007399;GO:0031175;GO:0005515;GO:0007399;GO:0031175;GO:0005515;GO:0007399;GO:0031175;GO:0007399;GO:0031175;	K06759	-	T	1AUY8;12P91;KOG3513;09X1D;1CVH6;0DKNQ;0V64Z;0UPP4	contactin 1 [Source:HGNC Symbol;Acc:HGNC:2171]	100342120	G1SX46
ENSOCUG00000034490	193.00561	293.337628	92.67359203	0.315928075	-1.662331948	9.8846E-06	0.004803352	GL018744	1990079	2015032	+	207	-	-	-	-	-	-	-	-	-
ENSOCUG00000000025	33490.15863	17369.91263	49610.40463	2.856111352	1.514052227	1.01838E-05	0.004811266	14	27892850	27968559	-	5372	SLCO2A1	GO:0005515;GO:0005886;GO:0006811;GO:0015132;GO:0015732;GO:0016020;GO:0016020;GO:0016020;GO:0016021;GO:0055085;GO:0055085;GO:0005515;GO:0016020;GO:0055085;	K14345	-	Q	0V4MT;12NAH;KOG3626;0DIGK;1CT74;0URQ8;09TNP;1AZ2R	solute carrier organic anion transporter family member 2A1 [Source:HGNC Symbol;Acc:HGNC:10955]	100357243	G1SCG0
ENSOCUG00000006439	1217.232839	695.6790942	1738.786584	2.499408993	1.321586997	1.54348E-05	0.007094993	GL018718	584651	647961	-	3444	ZHX3	GO:0003676;GO:0003676;GO:0003677;GO:0003677;GO:0003677;GO:0003700;GO:0005634;GO:0005634;GO:0005634;GO:0005654;GO:0042803;GO:0045669;GO:0045892;GO:0046982;	-	-	K	13KXP;0UFNS;0IHET;0DJ6M;09X5D;1B2TG;1CTYI;0V8S2	zinc fingers and homeoboxes 3 [Source:HGNC Symbol;Acc:HGNC:15935]	100350204	G1SR00
ENSOCUG00000003691	19.68032344	36.3812644	2.979382479	0.081893319	-3.610110437	1.65535E-05	0.007409016	15	33221263	33221648	-	249	-	GO:0005739;GO:0008137;	-	-	-	-	-	-	-
ENSOCUG00000008207	208.6545344	385.5122958	31.79677308	0.082479271	-3.59982461	1.80533E-05	0.007873108	16	49562606	49631092	+	2433	CAPN8	GO:0004198;GO:0005509;GO:0006508;GO:0007586;GO:0004198;GO:0004198;GO:0005509;GO:0005509;GO:0006508;GO:0006508;GO:0006508;GO:0007586;GO:0007586;GO:0008233;GO:0008234;GO:0016787;	K08577	EC:3.4.22.-	O;T	0V5ZI;0UPY3;1CZEY;1B4XS;12P1K;KOG0045;0A2R6;0DQD2	calpain 8 [Source:HGNC Symbol;Acc:HGNC:1485]	103350960	-
ENSOCUG00000010272	1452.708716	806.8649439	2098.552487	2.600872058	1.378995432	1.88044E-05	0.007995622	GL018771	267335	331281	-	1452	ACPP	GO:0003993;GO:0003993;GO:0005615;GO:0005615;GO:0005886;GO:0005886;GO:0005886;GO:0006144;GO:0006772;GO:0006772;GO:0008253;GO:0008253;GO:0009117;GO:0012506;GO:0012506;GO:0016020;GO:0016021;GO:0016021;GO:0016311;GO:0016311;GO:0016791;GO:0016791;GO:0030175;GO:0042131;GO:0042131;GO:0042802;GO:0042803;GO:0046085;GO:0046085;GO:0046085;GO:0051289;GO:0051930;GO:0051930;GO:0051930;GO:0052642;GO:0052642;GO:…	K19283	-	I	0V7JU;09VQX;1CRNN;1AUEA;0DGYE;130PG;KOG3720;0UFI8	acid phosphatase, prostate [Source:HGNC Symbol;Acc:HGNC:125]	100352974	G1SYZ1
ENSOCUG00000000265	350.0084428	183.4597732	516.5571125	2.815642381	1.493464107	2.20902E-05	0.00916368	12	70533665	70690583	-	3983	SNAP91	GO:0005543;GO:0005545;GO:0030136;GO:0030276;GO:0048268;GO:0005543;GO:0005545;GO:0030136;GO:0030276;GO:0048268;GO:0005543;GO:0005545;GO:0030136;GO:0030276;GO:0048268;GO:2000369;GO:0005543;GO:0005545;GO:0030136;GO:0030276;GO:0048268;GO:0005543;GO:0005545;GO:0030136;GO:0030276;GO:0048268;GO:0005543;GO:0005545;GO:0030136;GO:0030276;GO:0048268;GO:0005543;GO:0005545;GO:0030136;GO:0030276;GO:0048268;GO:…	K20043	-	F;T;U	12PM2;09V8V;1CR6Z;1AUYJ;0UKQS;0DGH9;KOG0251;0V68A	synaptosome associated protein 91 [Source:HGNC Symbol;Acc:HGNC:14986]	100355946	-
ENSOCUG00000002401	67.69270143	28.2498873	107.1355156	3.79242276	1.923119797	2.29192E-05	0.009281203	GL018905	483137	509297	+	2232	-	-	-	-	T	1CWE6;0DMIZ;13JX0;KOG3775;0V93P;0UNNH;09ZZC;1B0I9	-	-	-
ENSOCUG00000015962	237.2102473	403.5418229	70.87867171	0.175641452	-2.509294729	2.41032E-05	0.009533648	7	27787747	27864394	+	1829	ASZ1	GO:0005515;GO:0005737;GO:0005737;GO:0007140;GO:0007140;GO:0007275;GO:0007283;GO:0007283;GO:0030154;GO:0031047;GO:0034587;GO:0034587;GO:0043046;GO:0043046;GO:0051321;GO:0071546;GO:0071546;	K18410	-	S;B;E	0A3SX;KOG0504;0URF5;1D0IT;1AZI5;0VEME;0DRD3;13INW	Oryctolagus cuniculus ankyrin repeat, SAM and basic leucine zipper domain containing 1 (ASZ1), mRNA. [Source:RefSeq mRNA;Acc:NM_001171019]	100126561	Q09YN0
ENSOCUG00000007086	115.3154179	178.2094076	52.42142829	0.294156347	-1.765344931	3.09271E-05	0.011954723	15	93911847	93952727	-	4528	KIT	GO:0000166;GO:0004672;GO:0004672;GO:0004713;GO:0004713;GO:0004713;GO:0004714;GO:0004714;GO:0004714;GO:0005524;GO:0005524;GO:0005524;GO:0006468;GO:0006468;GO:0007169;GO:0007169;GO:0016020;GO:0016021;GO:0016301;GO:0016310;GO:0016740;GO:0018108;GO:0019955;GO:0019955;GO:0019955;GO:0038093;GO:0038093;GO:0038093;GO:0038109;GO:0038109;GO:0046872;GO:0004672;GO:0004713;GO:0004714;GO:0005524;GO:0006468;GO:…	K05091	EC:2.7.10.1	T	0V8AW;KOG0200;1CTFA;0UM9W;13JU7;0DIQ9;09XCU;1B0D8	KIT proto-oncogene, receptor tyrosine kinase [Source:HGNC Symbol;Acc:HGNC:6342]	100327263	A0A059VJ35
ENSOCUG00000006901	31.14643211	53.53965793	8.753206296	0.163490142	-2.612724444	3.30835E-05	0.012504089	18	38909356	38917411	-	1913	ANKRD1	GO:0001085;GO:0001650;GO:0002039;GO:0003677;GO:0003713;GO:0003714;GO:0005515;GO:0005634;GO:0005634;GO:0005654;GO:0005667;GO:0005737;GO:0005737;GO:0005829;GO:0006357;GO:0030016;GO:0031432;GO:0031432;GO:0031674;GO:0032991;GO:0035690;GO:0035914;GO:0035994;GO:0042826;GO:0043065;GO:0043517;GO:0050714;GO:0055008;GO:0070412;GO:0070528;GO:0071222;GO:0071222;GO:0071260;GO:0071347;GO:0071356;GO:0071560;GO:…	K21433	-	K;E	1CVRN;0VAB5;1ATVX;12SEJ;09ZE4;KOG0504;0DKWE;0UQ3I	Oryctolagus cuniculus ankyrin repeat domain 1 (ANKRD1), mRNA. [Source:RefSeq mRNA;Acc:NM_001082054]	100008719	Q9TU71
ENSOCUG00000011137	4592.595881	2709.400052	6475.791709	2.390120168	1.257083155	3.75128E-05	0.013869958	GL019233	6793	29597	-	1391	FBLN1	GO:0001933;GO:0001968;GO:0005201;GO:0005509;GO:0005509;GO:0005509;GO:0005515;GO:0005576;GO:0005604;GO:0005615;GO:0007162;GO:0008022;GO:0010952;GO:0016504;GO:0030198;GO:0030198;GO:0031012;GO:0042802;GO:0044877;GO:0062023;GO:0070051;GO:0070373;GO:0071953;GO:0072378;GO:1900025;GO:2000146;GO:2000647;	-	-	T	0UH6H;KOG1217;1CYHH;09WYP;0V7WU;0DP23;1ASGG;12P83	fibulin 1 [Source:HGNC Symbol;Acc:HGNC:3600]	-	-
ENSOCUG00000006357	1330.211116	544.9139148	2115.508318	3.882279862	1.956904121	4.22396E-05	0.015285335	11	55219576	55606524	-	5923	ADAMTS12	GO:0004222;GO:0006508;GO:0008237;GO:0004222;GO:0004222;GO:0004222;GO:0006508;GO:0006508;GO:0007160;GO:0008233;GO:0008233;GO:0008237;GO:0008237;GO:0016477;GO:0030167;GO:0032331;GO:0050727;GO:0051603;GO:0071347;GO:0071356;GO:0071773;GO:1901509;GO:1902203;GO:1902548;GO:2001113;GO:0004222;GO:0006508;GO:0008233;GO:0008237;GO:0004222;GO:0006508;GO:0008237;	K08626	EC:3.4.24.-	O	0V69U;1AU7Z;0DPW3;0UNHF;12PII;1CYVK;09U5N;KOG3538	ADAM metallopeptidase with thrombospondin type 1 motif 12 [Source:HGNC Symbol;Acc:HGNC:14605]	100351077	G1SQU9
ENSOCUG00000016298	1446.553823	849.5743906	2043.533255	2.405361176	1.266253538	5.32956E-05	0.018884407	3	68857390	68976855	-	1979	ATP6V1H	GO:0000221;GO:0000221;GO:0000221;GO:0006811;GO:0006897;GO:0046961;GO:0046961;GO:0046961;GO:1902600;GO:1902600;GO:1902600;GO:0000221;GO:0046961;GO:1902600;GO:0000221;GO:0046961;GO:1902600;	K02144	-	C	0V7QF;12P24;09WS5;1AYIP;0DI1T;KOG2759;0UP0G;1CSSF	ATPase H+ transporting V1 subunit H [Source:HGNC Symbol;Acc:HGNC:18303]	100353410	G1TBC4
ENSOCUG00000022248	102.6479712	47.33829558	157.9576467	3.336783566	1.738458112	5.49076E-05	0.019058549	7	159467566	159481613	+	2094	RUFY4	GO:0016239;GO:0071353;	-	-	S;T	09WFX;0DHRD;0V7EG;13N7X;1CSFR;0UJZZ;1B1Q7;KOG1729	RUN and FYVE domain containing 4 [Source:HGNC Symbol;Acc:HGNC:24804]	-	-
ENSOCUG00000017808	172.3801618	83.09602525	261.6642984	3.148938804	1.654865721	6.97627E-05	0.023730477	11	64054339	64075905	+	1995	NIM1K	GO:0000166;GO:0000287;GO:0004672;GO:0004672;GO:0004674;GO:0004674;GO:0005524;GO:0005524;GO:0005524;GO:0005524;GO:0006468;GO:0006468;GO:0006468;	K16310	EC:2.7.11.1	-	-	NIM1 serine/threonine protein kinase [Source:HGNC Symbol;Acc:HGNC:28646]	100337986	U3KM11
ENSOCUG00000022231	876.2110483	520.9184106	1231.503686	2.364100905	1.241291614	7.28448E-05	0.024028007	8	26496758	26514500	-	552	EMP1	GO:0005886;GO:0008219;GO:0016020;GO:0016020;GO:0016020;GO:0016021;GO:0016021;GO:0016021;GO:0032060;	-	-	U	1D35G;0VHND;0UV06;0DTTB;13PXT;0IW7W;1B5E1;0A6UE	epithelial membrane protein 1 [Source:HGNC Symbol;Acc:HGNC:3333]	100009209	P54850
ENSOCUG00000038584	173.0564307	254.1412803	91.97158099	0.361891547	-1.466370686	7.38888E-05	0.024028007	13	37600079	37603426	-	886	EFNA4	GO:0016020;GO:0046875;GO:0046875;GO:0048013;	-	-	-	-	ephrin A4 [Source:HGNC Symbol;Acc:HGNC:3224]	-	-
ENSOCUG00000007503	304.7907677	436.9268509	172.6546845	0.395156956	-1.33950229	7.51161E-05	0.024028007	1	111587561	111601277	+	1140	-	GO:0004197;GO:0004197;GO:0006508;GO:0006508;GO:0006508;GO:0008233;GO:0008234;GO:0008234;GO:0008234;GO:0016787;	K04394	-	D	1ARQT;0VAES;1CVVC;12S0S;0UFW8;0DM0G;09WHC;KOG3573	-	100359184	G1ST71
ENSOCUG00000022033	65.29151593	110.3894395	20.19359236	0.182930473	-2.450632674	7.62884E-05	0.024028007	13	32076981	32200313	+	3724	ITLN1	GO:0001934;GO:0005509;GO:0042802;GO:0043235;GO:0046326;GO:0070207;GO:0070492;	-	-	S	0IGEB;0UQMI;09ZS4;1CRP2;12SC8;0V863;0DMF0;1ASQE;0IGEB;0UQMI;09ZS4;1CRP2;12SC8;0V863;0DMF0;0IGEB;0UQMI;09ZS4;1CRP2;12SC8;0V863;0DMF0	intelectin 1 [Source:HGNC Symbol;Acc:HGNC:18259]	-	-
ENSOCUG00000013815	19304.39622	11638.04129	26970.75116	2.317464811	1.212547433	7.86331E-05	0.024316228	3	1152721	1285711	-	4364	SEMA6A	GO:0005515;GO:0030215;GO:0001764;GO:0004888;GO:0005515;GO:0005887;GO:0007166;GO:0007411;GO:0030215;GO:0030215;GO:0051642;GO:0071526;GO:2001224;GO:0005515;GO:0016020;GO:0016021;GO:0030215;GO:0030215;GO:0005515;GO:0030215;GO:0005515;GO:0030215;GO:0005515;GO:0030215;GO:0005515;GO:0030215;	K06842	-	T	0UFQG;09T8Q;1CPDX;1AZQM;0DEQ6;12PB2;KOG3611;0V47N	semaphorin 6A [Source:HGNC Symbol;Acc:HGNC:10738]	100355525	-
ENSOCUG00000038517	22.37498547	4.865842816	39.88412813	8.196756377	3.035053119	8.30673E-05	0.02476736	13	33007722	33013700	-	3430	KCNJ9	GO:0005242;GO:0006813;GO:0015467;GO:0016020;GO:0016021;GO:0098688;GO:0099056;	-	-	-	-	potassium inwardly rectifying channel subfamily J member 9 [Source:HGNC Symbol;Acc:HGNC:6270]	-	-
ENSOCUG00000024457	213.8924942	316.0010972	111.7838912	0.353745263	-1.499217267	8.46589E-05	0.02476736	GL018786	782029	791404	-	1555	CLIP3	GO:0001934;GO:0005802;GO:0005886;GO:0005886;GO:0008017;GO:0010828;GO:0018230;GO:0031115;GO:0031901;GO:0032588;GO:0035594;GO:0043065;GO:0044091;GO:0045121;GO:0045444;GO:0045807;GO:0055038;GO:0072321;GO:1903078;	-	-	Z	0V51X;12NUN;0DEM2;1AXN8;KOG4568;09U2X;0UN5N;1CPAY	CAP-Gly domain containing linker protein 3 [Source:HGNC Symbol;Acc:HGNC:24314]	-	-
ENSOCUG00000008038	26.05482948	7.461406414	44.64825255	5.983892322	2.581084215	8.51311E-05	0.02476736	7	117297655	117740469	-	2715	-	GO:0004114;GO:0004114;GO:0005515;GO:0007165;GO:0007165;GO:0008081;GO:0008081;GO:0016787;GO:0046872;	K13298	-	T	131SD;0UM23;09UEN;KOG3689;1B0TU;1CQGR;0V5DZ;0DFTA	-	100341520	-
ENSOCUG00000013273	115.5266172	231.0532345	0	0	-Inf	8.59169E-05	0.02476736	1	193435444	193446667	+	1348	MS4A15	GO:0016020;GO:0016021;GO:0016021;GO:0016021;	K22190	-	-	-	membrane spanning 4-domains A15 [Source:HGNC Symbol;Acc:HGNC:28573]	100353901	G1T529
ENSOCUG00000008947	888.051448	1298.85262	477.2502759	0.367439899	-1.444419801	8.81261E-05	0.024980821	GL018704	5858278	5862901	+	570	MARCKSL1	GO:0005516;GO:0005516;GO:0005886;GO:0008284;	K13536	-	T	0DSQI;1B34S;0A5BR;0UFPR;0V8IT;0IDYZ;1CYX1;12U8H	MARCKS like 1 [Source:HGNC Symbol;Acc:HGNC:7142]	100009158	P35566
ENSOCUG00000010749	251.6941074	362.0101126	141.3781022	0.390536334	-1.356471318	9.13795E-05	0.025478414	GL018897	404834	465954	-	5403	PLEKHG4B	GO:0005085;GO:0005089;GO:0035023;GO:0005089;GO:0035023;	-	-	T	0UGF7;0DK4B;0VC96;1CXYZ;KOG0689;12RPX;0A1DK	pleckstrin homology and RhoGEF domain containing G4B [Source:HGNC Symbol;Acc:HGNC:29399]	-	-
ENSOCUG00000021027	1615.049455	2354.493078	875.6058333	0.371887198	-1.42706301	0.000102104	0.027311345	4	5182519	5206032	-	671	-	GO:0003774;GO:0005737;GO:0005856;GO:0005868;GO:0005868;GO:0005868;GO:0005874;GO:0007018;GO:0007018;GO:0007018;GO:0030286;GO:0045505;	K10419	-	Z;N;D	1B6CD;0DUWD;KOG4115;0UVW3;0VJ67;0A8AJ;1D479;13SMX	-	100346957	G1TVQ3
ENSOCUG00000029101	16.1857277	0	32.3714554	Inf	Inf	0.00010277	0.027311345	MT	7796	7999	+	204	ATP8	GO:0000276;GO:0000276;GO:0005739;GO:0005753;GO:0006754;GO:0006811;GO:0015078;GO:0015078;GO:0015986;GO:0015986;GO:0016020;GO:0016021;GO:0031966;GO:0045263;	-	-	C	0VNY3;0ABVR;0UWYG;1D610;0J587;1B72M;13ZVI;0DWSS	ATP synthase F0 subunit 8 [Source:NCBI gene;Acc:808228]	-	-
ENSOCUG00000033199	419.3369313	242.934764	595.7390986	2.452259564	1.294111692	0.000103023	0.027311345	GL019690	3590	6589	-	804	-	GO:0005515;GO:0005856;GO:0008092;	-	-	-	-	-	-	-
ENSOCUG00000007327	165.3567612	88.33941357	242.3741087	2.74366898	1.456106433	0.000104377	0.027311345	19	43410831	43423128	+	4706	CNTNAP1	GO:0016020;GO:0016021;GO:0016021;GO:0016021;GO:0030913;GO:0030913;GO:0033270;GO:0033270;GO:0002175;GO:0007010;GO:0016020;GO:0016021;GO:0016021;GO:0016021;GO:0019227;GO:0022010;GO:0022011;GO:0030913;GO:0030913;GO:0030913;GO:0030913;GO:0031175;GO:0033270;GO:0033270;GO:0033270;GO:0048812;GO:0048812;GO:0050884;GO:0050885;GO:0071205;	K07379	-	W;T	0DI2H;12Q3Q;0UFSG;KOG3516;0V5DY;1CVRW;1ARMD;09VPX	contactin associated protein 1 [Source:HGNC Symbol;Acc:HGNC:8011]	100351604	-
ENSOCUG00000014480	2785.982318	1674.169761	3897.794876	2.328195722	1.219212345	0.000119607	0.030822459	8	33044169	33086147	-	4273	C1R	GO:0004252;GO:0005509;GO:0006508;GO:0006958;GO:0004252;GO:0005509;GO:0006508;GO:0006958;GO:0004252;GO:0004252;GO:0005509;GO:0005509;GO:0006508;GO:0006508;GO:0006508;GO:0006958;GO:0006958;GO:0008233;GO:0016787;GO:0004252;GO:0005509;GO:0006508;GO:0006958;GO:0004252;GO:0005509;GO:0006508;GO:0006958;GO:0004252;GO:0006508;	-	-	O;E	1ASZ3;09UJW;KOG3627;13HY4;0DFVH;0UHBT;1CQIW;0V5J3	complement C1r [Source:HGNC Symbol;Acc:HGNC:1246]	-	-
ENSOCUG00000003040	126.7327516	67.41544651	186.0500566	2.759754126	1.464539739	0.000130552	0.033036223	15	77517992	77836617	+	4022	ADAMTS3	GO:0001701;GO:0004175;GO:0004222;GO:0004222;GO:0005615;GO:0006508;GO:0006508;GO:0008233;GO:0008233;GO:0008233;GO:0008237;GO:0008237;GO:0010573;GO:0016485;GO:0016485;GO:0032964;GO:1900748;	K08619	EC:3.4.24.-	O	13BI5;1BAQX;0WFWP;0V2SE;0E7PS;1DEPW;0INDA;0B3HE	ADAM metallopeptidase with thrombospondin type 1 motif 3 [Source:HGNC Symbol;Acc:HGNC:219]	100355810	-
ENSOCUG00000014828	662.5488873	239.2195872	1085.878187	4.539252828	2.182454846	0.000132083	0.033036223	GL018779	457543	481053	+	1490	BDKRB2	GO:0002020;GO:0004930;GO:0004930;GO:0004930;GO:0004947;GO:0004947;GO:0004947;GO:0005768;GO:0005886;GO:0006939;GO:0006939;GO:0007165;GO:0007186;GO:0007186;GO:0007186;GO:0009651;GO:0016020;GO:0016021;GO:0016021;GO:0016021;GO:0031702;GO:0033137;GO:0042310;GO:0042310;GO:0042311;GO:0046982;GO:0050482;GO:1902219;GO:1902239;GO:0004930;GO:0004947;GO:0006939;GO:0007186;GO:0016021;GO:0042310;GO:0004930;GO:…	K03916	-	T	0UNSH;1CX5J;0A4PD;134XH;0VECD;1AY99;0INT3;0DSB6	bradykinin receptor B2 [Source:HGNC Symbol;Acc:HGNC:1030]	100338359	G1T869
ENSOCUG00000000575	14151.22461	8647.752341	19654.69688	2.27280987	1.184477002	0.000138284	0.03408594	3	38520056	38609318	-	3822	-	GO:0016020;GO:0016021;GO:0003712;GO:0005634;GO:0006357;GO:0016592;GO:0016020;GO:0016021;	K20413	-	T;K	0DS0S;0A26Y;0UK9Y;12SC0;0IJGA;0VFCZ;1AWVK;1D0JY;1CR2U;09V47;13EH3;0UI4H;0DGDD;0V63U;KOG0570;1ASR3;1D2RT;1B651;0VIYH;0A81U;13SNY;0UUR2;0IZDR;0DTJK	-	103347939	-
ENSOCUG00000006985	19.10407864	34.2356473	3.972509972	0.116034318	-3.107376544	0.000141073	0.034276712	13	32016996	32026446	+	972	ITLN2	-	K17527	-	S	1ASQE;0IGEB;0UQMI;09ZS4;1CRP2;12SC8;0V863;0DMF0	intelectin 2 [Source:HGNC Symbol;Acc:HGNC:20599]	100340925	-
ENSOCUG00000011464	421.8179954	672.3098394	171.3261514	0.254832134	-1.972380881	0.000156312	0.037444387	14	85972616	85988964	-	1636	CLDN1	GO:0001618;GO:0005198;GO:0005198;GO:0005886;GO:0005886;GO:0005886;GO:0005887;GO:0005887;GO:0005911;GO:0005923;GO:0005923;GO:0005923;GO:0005923;GO:0005923;GO:0016020;GO:0016021;GO:0016021;GO:0016021;GO:0016323;GO:0016324;GO:0016328;GO:0016338;GO:0030054;GO:0030054;GO:0030335;GO:0032991;GO:0034331;GO:0042802;GO:0045216;GO:0046718;GO:0051259;GO:0051260;GO:0051291;GO:0060054;GO:0061436;GO:0061436;GO:…	K06087	-	T;U	0DF4P;0V4TM;13MY5;0IG63;09TUD;1ASS2;1CPUI;0UGAC	claudin 1 [Source:HGNC Symbol;Acc:HGNC:2032]	100037713	A0ST56
ENSOCUG00000010458	914.408273	562.951204	1265.865342	2.248623563	1.169042163	0.000159999	0.037795334	1	98258500	98315907	+	4104	NECTIN1	GO:0005911;GO:0007155;GO:0016021;GO:0019062;GO:0042803;GO:0045202;GO:0050839;GO:0051963;GO:0002089;GO:0002934;GO:0005911;GO:0005911;GO:0005913;GO:0005913;GO:0006826;GO:0007155;GO:0007155;GO:0007156;GO:0007157;GO:0016020;GO:0016021;GO:0016021;GO:0016021;GO:0019062;GO:0019062;GO:0038023;GO:0042802;GO:0042803;GO:0042803;GO:0042803;GO:0043296;GO:0044291;GO:0045202;GO:0045202;GO:0048593;GO:0050839;GO:…	K06081	-	T	1ASVF;0V6TR;1CXZZ;0DP21;13KX8;0IF17;0A1EH;0UH71	nectin cell adhesion molecule 1 [Source:HGNC Symbol;Acc:HGNC:9706]	100341399	-
ENSOCUG00000014608	4469.521179	2804.661229	6134.381129	2.187209302	1.129091284	0.000162518	0.03786458	13	134849842	134857707	+	727	FABP3	GO:0005615;GO:0005615;GO:0008092;GO:0008289;GO:0008289;GO:0015909;GO:0032365;GO:0036041;GO:0042632;GO:0046320;GO:0050873;GO:0055091;GO:0070538;GO:0140214;GO:2001245;	K08752	-	I	1D34F;0UV51;0A6SZ;KOG4015;13QJM;0DTSF;1B5SG;0VHKT	fatty acid binding protein 3 [Source:HGNC Symbol;Acc:HGNC:3557]	100348000	G1T7R1
ENSOCUG00000021439	276.3177351	397.4295655	155.2059046	0.390524304	-1.356515757	0.000168702	0.038500999	19	53155605	53155991	+	387	-	GO:0003735;GO:0003735;GO:0005840;GO:0005840;GO:0006412;GO:0006412;	K02891	-	J	0DU99;1D34W;0VKDR;0UV3Z;KOG3434;0A9GU;13UU4;1B5IS	-	100354980	G1TSG1
ENSOCUG00000017272	2643.571906	1654.439659	3632.704152	2.195730821	1.134701203	0.000169777	0.038500999	7	104038187	104251392	-	4818	COBLL1	GO:0003785;GO:0003785;GO:0003785;GO:0003785;GO:0003785;GO:0003785;	-	-	S	1CXQN;0DQE6;0IIGI;0UKK6;13528;0VDMX;09TYV;1AZE0	cordon-bleu WH2 repeat protein like 1 [Source:HGNC Symbol;Acc:HGNC:23571]	100342442	-
ENSOCUG00000027801	13.62508577	2.060075342	25.19009619	12.22775482	3.612087625	0.000190813	0.042701991	13	95205475	95237488	-	881	-	GO:0005623;GO:0009055;GO:0009055;GO:0015035;GO:0015035;GO:0022900;GO:0045454;GO:0045454;GO:0055114;	K03676	-	O	KOG1752	-	100347668	-
ENSOCUG00000003325	293.4293724	169.4783755	417.3803693	2.462735249	1.300261542	0.000208149	0.045976618	2	83058561	83061252	-	1437	SOWAHC	GO:0005515;	-	-	S;E	0UQ9Q;KOG0504;1CS56;0DHF4;13JZ2;09UAA;0V742;1AU99	sosondowah ankyrin repeat domain family member C [Source:HGNC Symbol;Acc:HGNC:26149]	-	-
ENSOCUG00000001536	71.61430028	34.64772316	108.5808774	3.13385318	1.647937591	0.000233683	0.050343422	6	18528009	18531200	+	1187	-	GO:0008146;GO:0008146;GO:0008146;GO:0016740;	K01014	EC:2.8.2.1	S;J	0UQ9S;1B00G;0DF5W;KOG1584;09TVG;0V4UQ;12P7D;1CPVI	Oryctolagus cuniculus cytosolic phenol sulfotransferase SULT1A1 (LOC100009483), mRNA. [Source:RefSeq mRNA;Acc:NM_001082725]	100009483	Q95KM3
ENSOCUG00000008267	94.20626777	31.07804082	157.3344947	5.062561557	2.339867545	0.000233839	0.050343422	13	119472638	119526895	-	2141	CYP4X1	GO:0004497;GO:0005506;GO:0005506;GO:0016020;GO:0016021;GO:0016491;GO:0016705;GO:0016705;GO:0020037;GO:0020037;GO:0046872;GO:0055114;GO:0055114;GO:0055114;	K07428	EC:1.14.14.1	Q	0DIWE;09XIZ;1ATEU;1CUC9;KOG0157;12PPT;0V8GR;0UHDR	cytochrome P450 family 4 subfamily X member 1 [Source:HGNC Symbol;Acc:HGNC:20244]	100338914	G1SUU6
ENSOCUG00000023327	532.0823187	965.7433185	98.42131894	0.101912503	-3.294597036	0.00024886	0.052907573	2	1527642	1527797	+	156	-	GO:0003735;GO:0003735;GO:0005840;GO:0005840;GO:0006412;GO:0006412;	K02924	-	J	0UWKT;0DW4D;KOG0002;1D5E8;1B6VI;0VM93;0AAB6;13W5W	-	108178831	G1SYU7
ENSOCUG00000003854	97.79362676	48.35684279	147.2304107	3.044665496	1.606283734	0.000281999	0.059212849	GL018711	1963544	1978723	+	738	TPMT	GO:0008119;GO:0008119;GO:0008119;GO:0008757;GO:0008757;GO:0017144;GO:1904047;	K00569	EC:2.1.1.67	S	0IGTR;0UNS9;1CUQJ;1AY91;12SFT;0V9EJ;0DJX3;09YGV	Oryctolagus cuniculus thiopurine S- methyltransferase (TPMT), mRNA. [Source:RefSeq mRNA;Acc:NM_001082684]	100009411	Q3BCQ8
ENSOCUG00000001655	248.220256	124.41377	372.026742	2.990237673	1.580260159	0.000287608	0.059441039	11	16809238	16860904	-	1304	-	-	-	-	S	0DJYJ;0IH13;09YI3;12T2A;0V9FV;1AYB1;0UNTW;1CUS6	-	100346199	G1SFU6
ENSOCUG00000029742	86.1101307	140.140054	32.08020741	0.228915335	-2.127113982	0.000290076	0.059441039	16	31917975	31922248	-	540	-	GO:0005737;GO:0006914;GO:0006914;GO:0006914;GO:0006914;	-	-	-	-	-	-	-
ENSOCUG00000005640	23.11014639	39.53237831	6.687914467	0.169175616	-2.56340645	0.000303576	0.061466942	13	36776506	36777226	+	414	-	GO:0003676;GO:0003723;	-	-	O	1BAMD;13AT4;0WFE5;1DEG9;0B32P;KOG2113;0V2MM;0E7FB	-	-	-
ENSOCUG00000021329	1197.0767	733.8264677	1660.326931	2.262560707	1.177956502	0.000319964	0.064022858	GL018724	1129418	1181132	-	2080	CCNY	GO:0000079;GO:0019901;GO:0000079;GO:0019901;GO:0000079;GO:0000079;GO:0000086;GO:0000308;GO:0005634;GO:0005886;GO:0016538;GO:0019901;GO:0019901;GO:0045737;GO:0060828;	-	-	S;O;D	12T7Y;0UHGW;1CVBW;0DKHV;09Y8D;1AYQQ;KOG1675;0V95X	cyclin Y [Source:HGNC Symbol;Acc:HGNC:23354]	100344519	-
ENSOCUG00000001230	126.3371212	44.58719104	208.0870513	4.66696929	2.222485974	0.000352337	0.069480609	2	154726536	154791702	+	4436	XDH	GO:0001933;GO:0001937;GO:0004854;GO:0004854;GO:0004854;GO:0004854;GO:0004855;GO:0004855;GO:0004855;GO:0005506;GO:0005506;GO:0006919;GO:0007595;GO:0009055;GO:0009055;GO:0009115;GO:0010629;GO:0016491;GO:0016491;GO:0016491;GO:0016529;GO:0022900;GO:0030856;GO:0042803;GO:0043546;GO:0043546;GO:0043546;GO:0045602;GO:0046872;GO:0046872;GO:0046872;GO:0050660;GO:0050660;GO:0050660;GO:0051536;GO:0051536;GO:…	K00106	-	F	09X8X;0DI1X;KOG0430;1CTYV;12QCG;0UKEV;1AVXM;0V8S8	Oryctolagus cuniculus xanthine dehydrogenase (XDH), mRNA. [Source:RefSeq mRNA;Acc:NM_001122938]	100144327	A9YL93
ENSOCUG00000004915	404.1154047	627.4982299	180.7325795	0.28802086	-1.795754794	0.00035541	0.069480609	18	61336720	61364509	+	1490	PLEKHS1	-	-	-	T	0VAWV;1AZ3M;0II4G;0UQSN;13MXJ;0A006;1CWF1;0DMJS	pleckstrin homology domain containing S1 [Source:HGNC Symbol;Acc:HGNC:26285]	100345787	-
ENSOCUG00000014468	2971.245645	1868.562735	4073.928556	2.180247139	1.124491679	0.000362705	0.070100972	8	33038541	33046513	+	2220	C1S	GO:0004252;GO:0004252;GO:0004252;GO:0005509;GO:0005509;GO:0006508;GO:0006508;GO:0006508;GO:0006958;GO:0006958;GO:0008233;GO:0016787;GO:0042802;GO:0004252;GO:0006508;GO:0006958;	K01331	EC:3.4.21.42	O;E	09UJW;KOG3627;1CPG5;13HY4;0UQTZ;0DFVH;1AXUV;0V5J3	complement C1s [Source:HGNC Symbol;Acc:HGNC:1247]	100348898	G1T7G7
ENSOCUG00000002123	31.25456484	5.670198293	56.83893138	10.02415232	3.325408337	0.000380171	0.072342973	7	17042064	17989564	+	3497	GRM8	GO:0004930;GO:0004930;GO:0004930;GO:0005886;GO:0007165;GO:0007186;GO:0007186;GO:0007186;GO:0016020;GO:0016021;GO:0016021;GO:0016021;GO:0004930;GO:0004930;GO:0007186;GO:0007193;GO:0007196;GO:0008066;GO:0016021;	K04610	-	T	1CQA1;1AU4Z;KOG1056;12RDB;0UIMJ;0V59W;09TPM;0DFKD	glutamate metabotropic receptor 8 [Source:HGNC Symbol;Acc:HGNC:4600]	100344818	-
ENSOCUG00000003970	19.86134707	34.70140218	5.021291955	0.144699973	-2.788863443	0.000382812	0.072342973	14	107184867	107199342	-	1141	TAGLN3	GO:0005515;GO:0000122;GO:0005515;GO:0005634;GO:0005515;	K20526	-	Z	0VBM2;KOG2046;0DFF6;13HE5;1B0E5;1CWB2;0UQNC;09ZFN	transgelin 3 [Source:HGNC Symbol;Acc:HGNC:29868]	100350511	-
ENSOCUG00000027963	39.30701938	62.56384585	16.05019291	0.256541021	-1.962738562	0.000420675	0.078624644	GL019039	241047	242650	+	1023	-	GO:0005794;GO:0005975;GO:0005975;GO:0006486;GO:0008107;GO:0008107;GO:0016020;GO:0016020;GO:0016020;GO:0016021;GO:0016740;GO:0016757;GO:0032580;GO:0036065;	K00718	EC:2.4.1.69	G	1CT59;09X3N;1AYNY;0DIEQ;13KBS;0UKUZ;0V826;0IFKR	-	100349124	G1TN04
ENSOCUG00000008220	402.6917156	643.0882549	162.2951763	0.252368435	-1.98639662	0.000438499	0.081065169	16	21884165	22394690	-	7732	KIF26B	GO:0003777;GO:0005524;GO:0007018;GO:0008017;GO:0003777;GO:0005524;GO:0007018;GO:0008017;GO:0022409;GO:0030010;GO:0072092;GO:0000166;GO:0003774;GO:0003777;GO:0003777;GO:0005524;GO:0005524;GO:0005524;GO:0007018;GO:0007018;GO:0008017;GO:0008017;GO:0003777;GO:0005524;GO:0007018;GO:0008017;GO:0003777;GO:0005524;GO:0007018;GO:0008017;	K10404	-	Z	1AY1P;1CVJP;0DKR6;12RT9;0UPRG;KOG4280;0V91R;09Y49	kinesin family member 26B [Source:HGNC Symbol;Acc:HGNC:25484]	100349172	G1SUQ8
ENSOCUG00000009215	470.8402294	899.729109	41.95134968	0.046626645	-4.422701568	0.000456083	0.083409246	GL018915	9805	89120	+	6929	PADI3	GO:0004668;GO:0004668;GO:0005509;GO:0005509;GO:0005737;GO:0005737;GO:0018101;GO:0018101;GO:0004668;GO:0005509;GO:0005737;GO:0018101;GO:0004668;GO:0004668;GO:0005509;GO:0005737;GO:0005737;GO:0018101;GO:0018101;GO:0042802;GO:0004668;GO:0005509;GO:0005737;GO:0018101;GO:0004668;GO:0004668;GO:0005509;GO:0005509;GO:0005737;GO:0005737;GO:0018101;GO:0018101;GO:0004668;GO:0005509;GO:0005737;GO:0018101;	K01481	EC:3.5.3.15	S;K;E	13CMZ;1AVHK;0A1S6;0IF3F;0UJZ4;1CYC9;0VB61;0DMNF;0UQRD;13CMZ;0A1S6;0IF3F;1CYC9;0VB61;0DMNF;1B0I2	peptidyl arginine deiminase 3 [Source:HGNC Symbol;Acc:HGNC:18337]	100350962	-
ENSOCUG00000007710	198.5262349	117.8309468	279.2215231	2.369679026	1.244691659	0.000474407	0.085837382	7	63432053	63485337	+	1462	SCTR	GO:0004888;GO:0004888;GO:0004930;GO:0004930;GO:0004930;GO:0005881;GO:0007165;GO:0007166;GO:0007166;GO:0007186;GO:0007186;GO:0007186;GO:0007186;GO:0015055;GO:0016020;GO:0016020;GO:0016020;GO:0016021;GO:0016021;GO:0016021;GO:0017046;GO:0004888;GO:0004930;GO:0007166;GO:0007186;GO:0016020;GO:0016021;	K04588	-	T	0V7NU;0DJ9M;1AXF4;0UMYK;1CU1M;09WQA;KOG4564;12TNB	Oryctolagus cuniculus secretin receptor (SCTR), mRNA. [Source:RefSeq mRNA;Acc:NM_001082028]	100008671	O46502
ENSOCUG00000034095	204.8793392	118.2381287	291.5205498	2.465537582	1.301902244	0.000492988	0.087390418	GL018780	773349	775748	+	909	NKX1-2	GO:0003677;GO:0006355;GO:0043565;	-	-	-	-	NK1 homeobox 2 [Source:HGNC Symbol;Acc:HGNC:31652]	-	-
ENSOCUG00000000999	177.7046701	277.1877786	78.22156149	0.282197007	-1.825225408	0.000493267	0.087390418	4	39506620	39516232	-	2184	PMEL	GO:0005783;GO:0005789;GO:0005794;GO:0016020;GO:0016021;GO:0032438;GO:0032585;GO:0042470;GO:0042802;	K17304	-	U	0V9WW;12U9F;0A1Z6;0DRV1;1AWVR;1D13J;0UMDF;0IHN4	Oryctolagus cuniculus premelanosome protein (PMEL), mRNA. [Source:RefSeq mRNA;Acc:NM_001297728]	100347477	I4E993
ENSOCUG00000015721	10.91851678	20.3489443	1.488089266	0.073128573	-3.773420972	0.000509204	0.089283974	11	83360171	83372369	-	2433	CD180	GO:0002322;GO:0005515;GO:0016020;GO:0016021;GO:0031666;GO:0031666;GO:0071222;	K06555	-	T	1ARQB;0UM04;0A1C6;1CZFT;0DQDU;0VDMJ;13HS0;KOG4641	CD180 molecule [Source:HGNC Symbol;Acc:HGNC:6726]	100357587	G1TA23
ENSOCUG00000025952	134.891967	76.40809349	193.3758404	2.530829283	1.339610194	0.000579773	0.100620173	9	16328732	16352684	-	10197	CELSR3	GO:0001764;GO:0001932;GO:0004888;GO:0004888;GO:0004930;GO:0004930;GO:0004930;GO:0005509;GO:0005509;GO:0005886;GO:0005886;GO:0007155;GO:0007155;GO:0007156;GO:0007156;GO:0007165;GO:0007166;GO:0007166;GO:0007186;GO:0007186;GO:0007186;GO:0007413;GO:0016020;GO:0016020;GO:0016020;GO:0016021;GO:0016021;GO:0016021;GO:0032880;GO:0036514;GO:0036515;GO:0060271;GO:1904938;GO:0004888;GO:0004930;GO:0005509;GO:…	K04602	-	T	1CRER;12TQ4;0UPBJ;1AYWQ;09VG1;0V6F8;0DGQS;KOG4289	cadherin EGF LAG seven-pass G-type receptor 3 [Source:HGNC Symbol;Acc:HGNC:3230]	100349079	-
ENSOCUG00000001098	105.0936987	58.05365446	152.133743	2.620571339	1.389881384	0.000615338	0.105087963	2	25973724	26052337	+	2820	DTHD1	GO:0005515;GO:0007165;GO:0005515;GO:0007165;GO:0007165;GO:0005515;GO:0007165;	-	-	S	0IFXG;09VE6;1CRCU;1B32Z;0UU9U;0DGP0;13MP4;0V6DB	death domain containing 1 [Source:HGNC Symbol;Acc:HGNC:37261]	100350314	-
ENSOCUG00000001672	117.6603649	65.88361437	169.4371154	2.571764118	1.362758325	0.000617874	0.105087963	GL018720	350475	394971	-	1180	-	GO:0016020;GO:0016021;	K21890	-	T	12QPQ;0DIAM;1AW7T;0V7YC;1CT11;KOG1630;0UKRD;09X06	-	100338096	G1SFV8;G1SQB0
ENSOCUG00000013513	1928.778985	2709.630421	1147.927548	0.423647276	-1.239064501	0.000628046	0.105655634	2	155821894	155897974	-	374	LBH	GO:0005634;GO:0005737;GO:0006355;GO:0006355;GO:0005634;GO:0005634;GO:0005737;GO:0006355;GO:0010468;GO:0030879;GO:0032991;GO:0033147;GO:0043408;GO:0045892;GO:0045893;GO:0045893;GO:0060644;GO:1904674;GO:1904677;GO:2000103;GO:2000737;	-	-	K	1B61Z;0A7MN;0UVKS;13SID;0IYIC;0VIG4;1D3RK;0DU8S	LBH regulator of WNT signaling pathway [Source:HGNC Symbol;Acc:HGNC:29532]	100345405	G1T5J1
ENSOCUG00000013116	56.28351576	85.02512662	27.5419049	0.323926656	-1.626260904	0.000633636	0.105655634	17	43272088	43279408	-	2250	CDH24	GO:0005509;GO:0005509;GO:0005509;GO:0005886;GO:0005886;GO:0005886;GO:0005911;GO:0007155;GO:0007155;GO:0007155;GO:0007156;GO:0007156;GO:0016020;GO:0016020;GO:0016020;GO:0016021;GO:0098609;GO:0098609;GO:0098609;	K06814	-	Z;U	09ZII;1CX1D;1AWEW;0VBE1;0UMHR;KOG3594;0DN4W;13PEF	cadherin 24 [Source:HGNC Symbol;Acc:HGNC:14265]	100344593	-
ENSOCUG00000002745	527.3649216	322.4599277	732.2699154	2.270886558	1.183255638	0.000656366	0.108383213	13	38849732	38850568	+	315	S100A14	GO:0005509;GO:0005509;GO:0032496;GO:0034142;GO:0042379;GO:0042742;GO:0048471;GO:0071624;GO:0090026;	K23767	-	T	1D3ZD;0DUN5;13TJM;0A7X3;0UVPH;0VIS6;0IZKB;1B6HK	S100 calcium binding protein A14 [Source:HGNC Symbol;Acc:HGNC:18901]	100345947	G1SI77
ENSOCUG00000017302	569.9467838	885.0863803	254.8071873	0.287889626	-1.79641229	0.000668816	0.109034121	3	50065075	50712180	-	6351	SLIT3	GO:0003180;GO:0003181;GO:0005509;GO:0005515;GO:0005615;GO:0005615;GO:0007411;GO:0007411;GO:0008285;GO:0009887;GO:0010629;GO:0030308;GO:0032870;GO:0035385;GO:0048495;GO:0048846;GO:0050919;GO:0051414;GO:0060412;GO:0061364;GO:0070100;GO:0005509;GO:0005509;GO:0005515;GO:0005576;GO:0005509;GO:0005515;	K06850	-	T	KOG4237;0VBMR;0A0RC;1CX9Y;0UM5B;0DNCR;1AWKY;12U4V	slit guidance ligand 3 [Source:HGNC Symbol;Acc:HGNC:11087]	100338309	-
ENSOCUG00000004691	1328.451872	847.5702623	1809.333483	2.134729784	1.094053464	0.000677983	0.109034121	2	95366067	95381426	-	2525	PROM2	GO:0016021;GO:0001934;GO:0005886;GO:0009986;GO:0016020;GO:0016021;GO:0016021;GO:0016021;GO:0031346;GO:0042995;GO:0043087;GO:0048550;GO:0071914;GO:2001287;	K15602	-	S;G	1CU3X;KOG4331;09YVM;0DJBP;0UKQ4;1AVFV;0V9TE;12R3U	prominin 2 [Source:HGNC Symbol;Acc:HGNC:20685]	100358327	G1SMB9
ENSOCUG00000021523	42.48541994	0.595155344	84.37568454	141.7708594	7.147417211	0.000683723	0.109034121	3	620986	621381	-	396	-	GO:0000413;GO:0003755;GO:0003755;GO:0003755;GO:0016853;	-	-	O	0VIDW;0DUC2;KOG3258;13SK9;0A7EI	-	-	-
ENSOCUG00000010122	724.1157905	458.3584874	989.8730935	2.159604591	1.110767189	0.000685951	0.109034121	GL018763	1342471	1354411	-	2523	A1BG	GO:0005576;	-	-	S	1AVYB;09V53;0V64T;13RVZ;0DGEA;0IY79;1CR3S;0UI5Q	alpha-1-B glycoprotein [Source:HGNC Symbol;Acc:HGNC:5]	100354232	-
ENSOCUG00000021555	175.2729087	322.7761224	27.76969488	0.086033919	-3.538950628	0.000696563	0.109695801	16	47844692	47847349	+	1173	-	GO:0005160;GO:0005160;GO:0005576;GO:0007165;GO:0008083;GO:0008083;GO:0008083;	-	-	T	KOG3900	-	-	-
ENSOCUG00000010142	450.5755562	98.4420038	802.7091086	8.154132155	3.027531339	0.00072459	0.113062681	14	51841973	51934601	+	1857	PTX3	GO:0001550;GO:0001849;GO:0001872;GO:0001878;GO:0005615;GO:0008228;GO:0030198;GO:0031012;GO:0042802;GO:0044869;GO:0044871;GO:0045087;GO:0045087;GO:0045429;GO:0046597;GO:0046790;GO:0050766;GO:1903016;GO:1903019;	-	-	U	1ARH7;0USD5;1CRK4;0A2FB;0DQ2G;0IHCT;0VD2S;12U05	pentraxin 3 [Source:HGNC Symbol;Acc:HGNC:9692]	100343665	G1SYN4
ENSOCUG00000015146	102.6017053	57.21526786	147.9881428	2.5865149	1.371009502	0.000742276	0.114769339	GL018764	278150	278404	-	255	-	GO:0004867;GO:0004867;GO:0005515;GO:0007286;GO:0007286;GO:0010951;	K23418	-	O	1BAUA;0B3TE;0E7WM;1DEW9;0V2WS;13C0K;0IP08;0WG7U	-	100356501	G1T8U1
ENSOCUG00000008191	16.30619816	31.45242677	1.159969562	0.036880129	-4.76101248	0.00078044	0.119583061	3	52118496	52146233	+	1908	GABRP	GO:0004888;GO:0004888;GO:0004890;GO:0004890;GO:0005216;GO:0005216;GO:0005230;GO:0005230;GO:0005886;GO:0006811;GO:0006811;GO:0006811;GO:0016020;GO:0016020;GO:0016020;GO:0016021;GO:0016021;GO:0016021;GO:0034220;GO:0034220;GO:0004888;GO:0004890;GO:0005216;GO:0005230;GO:0006811;GO:0016020;GO:0016021;GO:0034220;	K05189	-	T	0DEFF;0UFD4;09T49;1AYJF;KOG3643;12N1C;1CP54;0V42Z	gamma-aminobutyric acid type A receptor pi subunit [Source:HGNC Symbol;Acc:HGNC:4089]	100339970	G1SUN5
ENSOCUG00000015619	183.9748884	9.112144037	358.8376327	39.3801537	5.299396837	0.000799558	0.121418539	5	28163838	28191063	-	816	CALB2	GO:0005509;GO:0005509;GO:0005829;GO:0005921;GO:0098688;GO:0098793;GO:0099509;GO:0099534;GO:0005509;	K23908	-	T	0DG57;0V5VF;1AX4K;0UHSS;1CQUT;KOG0027;09UVT;13INZ	calbindin 2 [Source:HGNC Symbol;Acc:HGNC:1435]	100359124	G1T9U6
ENSOCUG00000010633	1553.044334	1003.714451	2102.374216	2.094593949	1.066670595	0.000811035	0.122071584	4	86061604	86066620	-	1011	HMOX1	GO:0002246;GO:0004392;GO:0004392;GO:0004392;GO:0005623;GO:0005634;GO:0005783;GO:0006788;GO:0006788;GO:0006788;GO:0006879;GO:0006979;GO:0016020;GO:0016021;GO:0016239;GO:0016242;GO:0020037;GO:0034101;GO:0034395;GO:0034605;GO:0035094;GO:0042167;GO:0042168;GO:0042803;GO:0043065;GO:0045766;GO:0048471;GO:0048661;GO:0048662;GO:0051260;GO:0055072;GO:0055114;GO:0055114;GO:0071243;GO:0071276;GO:0071456;GO:…	K00510	EC:1.14.14.18	P	0DKYK;1B1BX;1D12W;0A1IP;0VAKY;KOG4480;0UPPE;139TG	heme oxygenase 1 [Source:HGNC Symbol;Acc:HGNC:5013]	100008919	G1SZP6
ENSOCUG00000008418	117.5184805	166.7597431	68.27721784	0.409434655	-1.288294877	0.000842917	0.125757357	8	37132821	37246078	-	5355	B4GALNT3	GO:0008376;GO:0032580;GO:0008376;GO:0032580;GO:0005794;GO:0005794;GO:0008376;GO:0008376;GO:0008376;GO:0016740;GO:0032580;GO:0032580;GO:0032580;GO:0033842;GO:0043231;	-	-	G	0DJDI;1AW4J;12S0W;0V8Y2;1CU5U;0UK29;KOG3588;09Y0F	beta-1,4-N-acetyl-galactosaminyltransferase 3 [Source:HGNC Symbol;Acc:HGNC:24137]	100351156	G1SV46
ENSOCUG00000015382	1126.257001	1573.699181	678.8148202	0.431349796	-1.213069822	0.000876123	0.12957478	13	48147571	48166256	-	1928	MAB21L3	-	-	-	T	0DKIA;12SU8;0A0FZ;1ASMI;1CVCC;0UQMT;0V9M1;KOG3963	mab-21 like 3 [Source:HGNC Symbol;Acc:HGNC:26787]	100350017	G1T9B2
ENSOCUG00000002431	39.49786194	10.39166056	68.60406331	6.601838362	2.722867816	0.000930285	0.135778305	13	53940557	53949889	-	1224	KCNC4	GO:0005216;GO:0005216;GO:0005244;GO:0005249;GO:0005249;GO:0005267;GO:0006811;GO:0006811;GO:0006811;GO:0006813;GO:0006813;GO:0006813;GO:0008076;GO:0008076;GO:0016020;GO:0016020;GO:0016020;GO:0016021;GO:0016021;GO:0031594;GO:0034765;GO:0043679;GO:0046928;GO:0055085;GO:0055085;GO:0071805;	K04890	-	-	-	potassium voltage-gated channel subfamily C member 4 [Source:HGNC Symbol;Acc:HGNC:6236]	100009422	-
ENSOCUG00000012721	3887.209679	2584.908011	5189.511346	2.007619352	1.005485758	0.000934035	0.135778305	11	60401329	60443024	-	4371	DAB2	GO:0001650;GO:0001934;GO:0005515;GO:0005886;GO:0005905;GO:0008022;GO:0010718;GO:0010862;GO:0030136;GO:0030335;GO:0030511;GO:0032091;GO:0032436;GO:0035026;GO:0035615;GO:0038024;GO:0043066;GO:0043231;GO:0045807;GO:0045892;GO:0045893;GO:0046332;GO:0060391;GO:0060766;GO:0090090;GO:1903077;GO:2000096;GO:2000370;GO:2000643;GO:0005515;GO:0005515;GO:0005515;GO:0005515;	K12475	-	T	1AWF7;1CXXC;0A1CA;0UFXS;13HB9;0VC7V;0DFNJ;KOG3535	DAB adaptor protein 2 [Source:HGNC Symbol;Acc:HGNC:2662]	100352505	-
ENSOCUG00000015713	493.0454406	669.8439242	316.2469569	0.472120363	-1.082773385	0.000951849	0.137195291	1	193550488	193561477	+	3415	TMEM132A	GO:0016020;GO:0016021;	K17599	-	S	KOG4789;1CSMS;0DHX2;0UK87;13M5F;09WME;0V7K6;1AWKV	transmembrane protein 132A [Source:HGNC Symbol;Acc:HGNC:31092]	100358761	G1TK10
ENSOCUG00000005022	1049.814524	1414.405167	685.2238803	0.484460815	-1.045548115	0.000964213	0.137809543	17	40910887	40913846	+	1291	APEX1	GO:0000723;GO:0003677;GO:0003677;GO:0003677;GO:0003677;GO:0003684;GO:0003691;GO:0003713;GO:0003906;GO:0004518;GO:0004518;GO:0004518;GO:0004519;GO:0004519;GO:0004519;GO:0004519;GO:0005623;GO:0005634;GO:0005634;GO:0005634;GO:0005654;GO:0005730;GO:0005737;GO:0005737;GO:0005737;GO:0005739;GO:0005739;GO:0005813;GO:0006281;GO:0006281;GO:0006281;GO:0006281;GO:0006284;GO:0006974;GO:0008081;GO:0008309;GO:…	K10771	EC:4.2.99.18	L	KOG1294;1CX58;1B080;0URIQ;0DN8M;0VA8X;12PKJ;0A0M6	apurinic/apyrimidinic endodeoxyribonuclease 1 [Source:HGNC Symbol;Acc:HGNC:587]	100348924	G1SN16
ENSOCUG00000006190	74.31992639	110.2044502	38.4354026	0.348764524	-1.519674797	0.001007532	0.14280088	1	103076973	103403200	-	7961	NCAM1	GO:0005515;GO:0005829;GO:0005886;GO:0007155;GO:0007155;GO:0016020;GO:0016020;GO:0016020;GO:0016021;GO:0005515;GO:0007155;GO:0016020;GO:0005515;GO:0007155;GO:0016020;GO:0005515;GO:0007155;GO:0016020;GO:0005515;GO:0007155;GO:0016020;	K06491	-	-	-	neural cell adhesion molecule 1 [Source:HGNC Symbol;Acc:HGNC:7656]	100348118	-
ENSOCUG00000005255	454.7724309	278.6997947	630.8450671	2.263528998	1.178573789	0.001045127	0.146905077	1	104208433	104234438	+	1305	-	GO:0005125;GO:0005125;GO:0005125;GO:0005576;GO:0005615;GO:0005615;GO:0005615;GO:0006954;GO:0006954;GO:0006955;GO:0006955;GO:0007165;GO:0005125;GO:0005615;GO:0006954;GO:0006955;	-	-	T	1D280;13WDN;0VGFJ;1B0CH;0A5KI;0DSWY;0UQM1;0J3U9	-	-	-
ENSOCUG00000003048	136.4031905	71.93628652	200.8700946	2.792333387	1.481471201	0.001085065	0.151268802	GL018897	141335	142451	+	516	TPPP	GO:0000287;GO:0001578;GO:0001578;GO:0001578;GO:0003924;GO:0005634;GO:0005634;GO:0005737;GO:0005737;GO:0005739;GO:0005829;GO:0005874;GO:0005874;GO:0014003;GO:0015631;GO:0015631;GO:0015631;GO:0030953;GO:0031643;GO:0032273;GO:0032288;GO:0042803;GO:0046785;GO:0046785;GO:0046785;GO:0046785;GO:0048471;GO:0048709;GO:0051418;GO:0070507;GO:0072686;GO:0097427;GO:1904428;	-	-	Z;T	1AVQ4;0V9ZN;1CVBP;09Z27;0DKHM;0UMUY;KOG4070;13KW2	tubulin polymerization promoting protein [Source:HGNC Symbol;Acc:HGNC:24164]	100358311	-
ENSOCUG00000010311	1696.045575	920.620818	2471.470332	2.684569242	1.424690616	0.00110354	0.152593507	1	101780603	101848991	+	4112	-	GO:0016020;GO:0016021;	-	-	S	1CYRG;0A27H;0UPCB;0V4XX;0DF8A;0IF0E;1AY94;12NFD;1CYRG;0A27H;0UPCB;0V4XX;0DF8A;0IF0E;1AXP5;12NFD	-	100357878	-
ENSOCUG00000002863	743.9359362	1006.096627	481.7752451	0.478855839	-1.0623367	0.001245083	0.170777133	7	101416982	101474608	-	3340	IFIH1	GO:0003677;GO:0003725;GO:0003727;GO:0005524;GO:0008270;GO:0009615;GO:0016787;GO:0016925;GO:0032727;GO:0032728;GO:0035549;GO:0039530;GO:0042802;GO:0043021;GO:0045087;GO:0051607;GO:0060760;GO:0071360;GO:1902741;GO:1904469;GO:2000778;GO:0003677;GO:0003677;GO:0005524;GO:0005524;GO:0008270;GO:0016787;GO:0016787;GO:0046872;GO:0003677;GO:0005524;GO:0016787;GO:0003677;GO:0005524;GO:0016787;	K12647	EC:3.6.4.13	A	1AYAQ;0V4TZ;KOG0354;1CTWW;0DF53;12NQ7;09TUS;0UQBF	interferon induced with helicase C domain 1 [Source:HGNC Symbol;Acc:HGNC:18873]	100343560	-
ENSOCUG00000016811	90.00342713	131.0228985	48.98395575	0.373857977	-1.41943778	0.0012692	0.172692479	18	58251051	58466162	+	3808	RBM20	GO:0003676;GO:0003676;GO:0003723;GO:0003723;GO:0005634;GO:0005634;GO:0005634;GO:0005634;GO:0007507;GO:0008270;GO:0008270;GO:0033120;GO:0033120;GO:0043484;GO:0043484;	-	-	A;S	0V6Y7;09VZR;1AUTN;13HJY;0IGBX;0DH8K;1CRYP;0UJAW	RNA binding motif protein 20 [Source:HGNC Symbol;Acc:HGNC:27424]	100343419	-
ENSOCUG00000009998	359.1590113	230.8904289	487.4275937	2.111077519	1.077979555	0.001314027	0.177372761	15	41627804	41725445	-	1766	SGMS2	GO:0002950;GO:0005794;GO:0005886;GO:0005887;GO:0006686;GO:0006686;GO:0016020;GO:0016021;GO:0030173;GO:0030500;GO:0033188;GO:0033188;GO:0046513;GO:0047493;GO:1905373;	K04714	EC:2.7.8.27	I;G	0UGQ4;0V51K;1AV13;12NHQ;KOG3058;0DFEG;1CQ48;09U2M	sphingomyelin synthase 2 [Source:HGNC Symbol;Acc:HGNC:28395]	100354454	G1SYC4
ENSOCUG00000017283	653.2319977	872.2742225	434.189773	0.497767516	-1.006456011	0.001468118	0.19661224	15	55658483	55737113	-	4617	SMARCAD1	GO:0005515;GO:0005524;GO:0005524;GO:0005515;GO:0005524;GO:0005515;GO:0005524;GO:0000018;GO:0000729;GO:0000792;GO:0003677;GO:0005515;GO:0005524;GO:0005634;GO:0005654;GO:0035861;GO:0043044;GO:0043596;GO:0051304;GO:0070932;GO:0070933;	K14439	EC:3.6.4.12	B	1CWVU;0DMZJ;0A0CU;1ARR6;0VB93;KOG0389;0UR89;12PN5	SWI/SNF-related, matrix-associated actin-dependent regulator of chromatin, subfamily a, containing DEAD/H box 1 [Source:HGNC Symbol;Acc:HGNC:18398]	100354709	G1TDE1
ENSOCUG00000014728	650.5847756	872.1061592	429.063392	0.491985279	-1.023312947	0.001525597	0.201700951	GL018841	731506	757419	+	2226	-	GO:0016020;GO:0016021;	-	-	S	0UIBQ;0DGI3;0IEHG;1CR7U;1ATVW;09V9Q;12P6X;0V68Y	-	-	-
ENSOCUG00000004912	36.41420198	17.00402449	55.82437947	3.283009825	1.715019067	0.00153517	0.201700951	GL018810	138694	162969	+	1068	GNAZ	GO:0000166;GO:0003924;GO:0003924;GO:0005525;GO:0005525;GO:0005525;GO:0007165;GO:0007165;GO:0007165;GO:0007186;GO:0007186;GO:0007188;GO:0007188;GO:0019001;GO:0019001;GO:0030425;GO:0031683;GO:0031683;GO:0044297;GO:0046872;	K04535	-	T;D	0UIZW;KOG0082;12WUH;09VRM;0DH06;1AUH1;1CRQG;0V6QJ	G protein subunit alpha z [Source:HGNC Symbol;Acc:HGNC:4395]	100356759	-
ENSOCUG00000014000	917.285633	1217.494591	617.0766753	0.50684141	-0.980393694	0.001550618	0.201700951	3	23346058	23347107	-	1050	TAF7	GO:0000122;GO:0001097;GO:0003700;GO:0003713;GO:0005634;GO:0005654;GO:0005667;GO:0005669;GO:0005669;GO:0005669;GO:0005669;GO:0005737;GO:0005794;GO:0006352;GO:0006357;GO:0006366;GO:0006366;GO:0006367;GO:0006367;GO:0006367;GO:0006469;GO:0008134;GO:0030520;GO:0033276;GO:0035035;GO:0035035;GO:0035067;GO:0042809;GO:0044212;GO:0045344;GO:0045347;GO:0045892;GO:0045944;GO:0046966;GO:0046982;GO:0061628;GO:…	K03132	-	K	1AXMC;0UNKG;13IQH;09YCP;KOG4011;0V9A6;0DJSH;1CUJK	TATA-box binding protein associated factor 7 [Source:HGNC Symbol;Acc:HGNC:11541]	100353662	G1T6I3
ENSOCUG00000000152	1955.70606	1279.804795	2631.607325	2.05625681	1.040020457	0.001553553	0.201700951	GL018801	898296	964480	+	3635	EDEM3	GO:0003824;GO:0004571;GO:0005509;GO:0016020;GO:1904382;GO:0003824;GO:0003824;GO:0004571;GO:0004571;GO:0004571;GO:0004571;GO:0005509;GO:0005509;GO:0005788;GO:0006516;GO:0008152;GO:0016020;GO:0016020;GO:0016787;GO:0016798;GO:0043161;GO:1904382;GO:1904382;GO:1904382;GO:1904382;	K10086	-	G	1AWYN;09WWU;0UMG8;1CYN0;12Q68;KOG2429;0DPP2;0V7V4	ER degradation enhancing alpha-mannosidase like protein 3 [Source:HGNC Symbol;Acc:HGNC:16787]	100345546	-
ENSOCUG00000003636	7979.46303	5413.199697	10545.72636	1.948150253	0.962104951	0.001569949	0.202285576	4	2164557	2233343	+	4125	TGM2	GO:0003810;GO:0003810;GO:0018149;GO:0018149;GO:0046872;GO:0003810;GO:0018149;GO:0003810;GO:0018149;GO:0003810;GO:0018149;GO:0003810;GO:0018149;GO:0003810;GO:0003810;GO:0005739;GO:0005829;GO:0005829;GO:0005886;GO:0018149;GO:0018149;GO:0031226;GO:0032471;GO:0043065;GO:0043277;GO:0045785;GO:0051561;GO:0060445;GO:0060662;GO:0003810;GO:0018149;GO:0003810;GO:0018149;	K05625	EC:2.3.2.13	-	-	transglutaminase 2 [Source:HGNC Symbol;Acc:HGNC:11778]	100352148	-
ENSOCUG00000029818	369.14572	237.499134	500.7923061	2.108606872	1.076290145	0.001634145	0.208973998	GL019018	244351	245742	-	1392	-	-	-	-	-	-	-	-	-
ENSOCUG00000016719	383.8470989	249.0639713	518.6302265	2.082317341	1.058189949	0.001653773	0.209141288	18	40477432	40483978	+	2365	-	GO:0000122;GO:0000977;GO:0001227;GO:0001570;GO:0001701;GO:0001889;GO:0002009;GO:0002573;GO:0003677;GO:0003677;GO:0003677;GO:0003682;GO:0003700;GO:0005634;GO:0005634;GO:0005737;GO:0006355;GO:0006355;GO:0006357;GO:0007165;GO:0007219;GO:0007492;GO:0009887;GO:0009952;GO:0016525;GO:0022027;GO:0030097;GO:0030177;GO:0030183;GO:0030878;GO:0030900;GO:0030948;GO:0031016;GO:0035050;GO:0035264;GO:0042127;GO:…	K08024	-	K	1B00D;0VB07;0DMPK;1CWJ8;0A040;13W9A;0UQ8R;KOG0483	-	100008709	G1TC79
ENSOCUG00000017768	358.7295915	98.93795028	618.5212326	6.251607507	2.644227205	0.001660047	0.209141288	13	31707911	31736290	-	567	-	-	-	-	U	0UWPQ;0VME4;1B6WE;13XGP;0J4T9;0AAF9;1D5GW;0DW74	-	-	-
ENSOCUG00000017594	25.63106458	41.24361131	10.01851785	0.242910781	-2.041501571	0.001741559	0.21549876	6	27499999	27502385	+	405	-	GO:0005886;GO:0009966;GO:0009966;GO:0016020;GO:0031225;GO:0046658;GO:0046658;GO:0062023;GO:0062023;	K08108	-	T	0V4EI;1CPG7;12N7G;09TFF;0DESG;1ATFA;KOG3821;0UHV9	-	103348619	-
ENSOCUG00000011218	57.64728699	25.08954268	90.20503131	3.595323855	1.84612173	0.001742821	0.21549876	9	8011236	8056757	-	4595	-	-	-	-	S	09ZMK;1CW0G;0DM5C;0UKDQ;1ATNM;12TR1;0IJJ5;0VAI9	-	-	-
ENSOCUG00000010020	53.61309094	27.40243088	79.823751	2.913017146	1.542514193	0.001760659	0.21549876	13	100965780	101155625	-	3475	DNAJC6	GO:0014069;GO:0016191;GO:0045202;GO:0072318;GO:0098793;GO:2000369;	K09526	-	O;T	0DN2Y;12RV8;KOG2283;0US2T;KOG0431;0A0FV;1B2M9;0VBC1;1CWZF	DnaJ heat shock protein family (Hsp40) member C6 [Source:HGNC Symbol;Acc:HGNC:15469]	100355560	-
ENSOCUG00000008579	659.2133815	883.0836791	435.3430839	0.492980557	-1.020397347	0.00176119	0.21549876	16	60136162	60187069	-	3715	VASH2	GO:0005737;GO:0045765;GO:0005737;GO:0045765;GO:0005737;GO:0005737;GO:0045765;GO:0045765;GO:0000768;GO:0001938;GO:0003779;GO:0004181;GO:0005737;GO:0005737;GO:0006508;GO:0045765;GO:0045766;GO:0060674;GO:0060711;GO:0060716;GO:0140253;GO:0005737;GO:0045765;	K23355	EC:3.4.17.17	S	0IFRP;12TU0;1CS29;1B0J6;0V71C;0UJFZ;0DHC5;09W2Z	vasohibin 2 [Source:HGNC Symbol;Acc:HGNC:25723]	100358188	-
ENSOCUG00000003517	462.0642199	264.5009635	659.6274763	2.493856611	1.318378517	0.001775094	0.215648567	GL018973	239243	265278	-	3292	CARD10	GO:0042981;GO:0042981;GO:0007250;GO:0042981;GO:0090051;GO:1900182;GO:0042981;GO:0042981;	K20912	-	F;T	0A0SS;KOG0708;0DNE0;1CXB8;1AUA3;1353H;0VBP8;0UTG1	caspase recruitment domain family member 10 [Source:HGNC Symbol;Acc:HGNC:16422]	100358135	-
ENSOCUG00000027535	821.3476939	480.6488578	1162.04653	2.417662106	1.273612627	0.001806957	0.217962608	10	34274046	34286856	-	6733	PEG10	GO:0001890;GO:0003676;GO:0003676;GO:0005654;GO:0005829;GO:0008270;GO:0008270;	-	-	S;T	0J3P7;13UH2;0UP7T;1AYXP;1CY36;0DP54;0A1H9;0VCCS	Oryctolagus cuniculus paternally expressed 10 (PEG10), transcript variant 1, mRNA. [Source:RefSeq mRNA;Acc:NM_001292089]	-	-
ENSOCUG00000008618	978.0937842	1302.729789	653.4577793	0.501606538	-0.995371943	0.001832096	0.21943863	8	9789517	9816964	+	4067	SINHCAF	GO:0008284;GO:0016580;GO:0030336;GO:0045596;	-	-	S	0UU7H;0A4K1;1D0IU;0VFF6;1B4AH;0IKPK;0DRD4;13HAE	SIN3-HDAC complex associated factor [Source:HGNC Symbol;Acc:HGNC:30702]	100339557	G1SVI8
ENSOCUG00000013432	136.8672505	76.01291483	197.7215862	2.601157799	1.379153923	0.001890159	0.224809991	9	4694891	4737440	+	1978	WNT7A	GO:0000578;GO:0001502;GO:0002062;GO:0005102;GO:0005102;GO:0005102;GO:0005125;GO:0005576;GO:0005576;GO:0005576;GO:0007275;GO:0007275;GO:0007275;GO:0016055;GO:0016055;GO:0016055;GO:0021846;GO:0032270;GO:0035115;GO:0035116;GO:0035313;GO:0042733;GO:0045893;GO:0045944;GO:0048018;GO:0048864;GO:0050768;GO:0051965;GO:0060054;GO:0060070;GO:0060071;GO:0060997;GO:0062009;GO:0071560;GO:0098978;GO:1904891;GO:…	K00572	-	-	-	Wnt family member 7A [Source:HGNC Symbol;Acc:HGNC:12786]	100355697	-
ENSOCUG00000007509	395.3749438	530.6791701	260.0707175	0.490071463	-1.028935953	0.001949057	0.230205284	GL018805	717546	719909	-	1181	ZNF32	GO:0003676;GO:0003676;	-	-	K	0DS4X;1ASQP;1D1DY;0VD4N;0UH1I;0A4NA;KOG1721;13NBY	zinc finger protein 32 [Source:HGNC Symbol;Acc:HGNC:13095]	100341223	-
ENSOCUG00000021196	398.9584639	260.301929	537.6149989	2.065351575	1.046387386	0.001965169	0.230507581	9	56512486	56673796	+	4993	EPB41L3	GO:0001558;GO:0001558;GO:0003779;GO:0003779;GO:0005198;GO:0005198;GO:0005623;GO:0005856;GO:0005856;GO:0005886;GO:0005886;GO:0005911;GO:0005911;GO:0007010;GO:0007010;GO:0007016;GO:0007016;GO:0008092;GO:0008092;GO:0030866;GO:0030866;GO:0001558;GO:0003779;GO:0005198;GO:0005856;GO:0005886;GO:0005886;GO:0005911;GO:0005911;GO:0007010;GO:0007016;GO:0008092;GO:0030054;GO:0030866;GO:0001558;GO:0003779;GO:…	K23961	-	S;T	0V4NT;1ASZ0;12PZE;KOG3527;1CW70;0UHBK;09TPN;0DEZZ	erythrocyte membrane protein band 4.1 like 3 [Source:HGNC Symbol;Acc:HGNC:3380]	100340836	-
ENSOCUG00000012397	3456.224266	2329.758249	4582.690283	1.967023954	0.976014526	0.002063784	0.240416746	X	56332880	56399958	-	1858	TSC22D3	GO:0003700;GO:0003700;GO:0005634;GO:0006355;GO:0006355;GO:0006970;GO:0070236;GO:0003700;GO:0006355;GO:0003700;GO:0006355;GO:0003700;GO:0006355;	-	-	K	0V3EF;0WHUH;1DFP2;0B57Y;0E8RZ;1BB76;0IRR1;13EBV	TSC22 domain family member 3 [Source:HGNC Symbol;Acc:HGNC:3051]	100356656	-
ENSOCUG00000001102	265.7120168	168.7316164	362.6924173	2.149522568	1.104016257	0.002081835	0.240869709	GL018816	561758	573769	+	4047	L1CAM	GO:0005515;GO:0005886;GO:0007160;GO:0007411;GO:0009986;GO:0016020;GO:0016021;GO:0016477;GO:0019904;GO:0030424;GO:0031175;GO:0043025;GO:0050808;GO:0061564;GO:0005515;	K06550	-	T	1B3C3;0DGEG;12P91;1CR3Y;KOG3513;09V5A;0USBQ;0V64Z	Oryctolagus cuniculus L1 cell adhesion molecule (L1CAM), mRNA. [Source:RefSeq mRNA;Acc:NM_001171365]	100328746	B7NZP1
ENSOCUG00000012890	1295.781724	646.9977321	1944.565715	3.005521687	1.58761543	0.002121382	0.243753661	3	100841282	100866457	+	2159	-	GO:0003677;GO:0003700;GO:0003700;GO:0005634;GO:0005667;GO:0005667;GO:0006355;GO:0006355;GO:0046983;GO:0046983;GO:0051726;GO:0051726;	K04682	-	K	12P2C;09V1B;0V60V;1CR04;0DEHR;KOG2577;1ARJ5;0UPH4	-	100348976	-
ENSOCUG00000003473	1468.268622	2155.901913	780.6353305	0.36209223	-1.465570878	0.002135424	0.243753661	13	8123659	8239885	+	3522	VIPR2	GO:0004888;GO:0004888;GO:0004930;GO:0004930;GO:0004930;GO:0004999;GO:0004999;GO:0007165;GO:0007166;GO:0007166;GO:0007186;GO:0007186;GO:0007186;GO:0016020;GO:0016020;GO:0016020;GO:0016021;GO:0016021;GO:0016021;GO:0004888;GO:0004930;GO:0004999;GO:0007166;GO:0007186;GO:0016020;GO:0016021;GO:0004888;GO:0004930;GO:0004999;GO:0007166;GO:0007186;GO:0016020;GO:0016021;	K04590	-	T	1CVQ8;1B53S;0DKV8;0UU8R;KOG4564;09ZCX;0VA9Z;13KZH	vasoactive intestinal peptide receptor 2 [Source:HGNC Symbol;Acc:HGNC:12695]	100009382	-
ENSOCUG00000012384	180.2312473	103.7536878	256.7088069	2.474213807	1.306970175	0.00221534	0.251190023	7	146955447	146956514	-	1068	GPR1	GO:0004930;GO:0004930;GO:0004930;GO:0005654;GO:0005886;GO:0007165;GO:0007186;GO:0007186;GO:0007186;GO:0016020;GO:0016021;GO:0016021;GO:0016021;GO:0043231;	-	-	T	12S71;09ZQ5;1CW35;0UH1T;0IGAX;0DM80;1B2B8;0VAKT	G protein-coupled receptor 1 [Source:HGNC Symbol;Acc:HGNC:4463]	-	-
ENSOCUG00000007355	2100.853751	1442.548129	2759.159372	1.912698313	0.935609337	0.00225493	0.253985741	9	72753854	72814979	+	3782	DSG2	GO:0002934;GO:0003165;GO:0005509;GO:0005509;GO:0005886;GO:0005886;GO:0005886;GO:0005886;GO:0007155;GO:0007155;GO:0007155;GO:0007156;GO:0007156;GO:0007156;GO:0014704;GO:0016020;GO:0016020;GO:0016020;GO:0016021;GO:0030054;GO:0030057;GO:0030057;GO:0043231;GO:0050839;GO:0086073;GO:0086091;GO:0098911;GO:0005509;GO:0005886;GO:0007155;GO:0007156;GO:0016020;	K07597	-	Z;U	09TST;1CPSY;0V4S4;0DF33;13JJ4;KOG3594;1AX5D;0UG8D	desmoglein 2 [Source:HGNC Symbol;Acc:HGNC:3049]	100348149	G1SSW0
ENSOCUG00000017109	162.73709	224.5757402	100.8984398	0.449284681	-1.154298223	0.00232125	0.25973566	9	65193812	65294784	+	2430	TTC39C	GO:0005515;GO:0005515;	-	-	S;U	KOG3783;13G5Y;1DGEA;0B6FY;0WJ6C;0E9J9;0V3WU	tetratricopeptide repeat domain 39C [Source:HGNC Symbol;Acc:HGNC:26595]	100347822	G1TD18
ENSOCUG00000013134	114.6089636	166.531821	62.68610621	0.37642119	-1.409580251	0.002366125	0.263026453	8	17830753	17971874	+	1608	ST8SIA1	GO:0005794;GO:0006486;GO:0006486;GO:0008284;GO:0008373;GO:0008373;GO:0016020;GO:0016021;GO:0016740;GO:0016757;GO:0034605;GO:0097503;	K03371	EC:2.4.99.8	G	0UQWA;1CZ2S;KOG2692;1B1EG;0A2EV;0VDAG;0DQ1Y;12T0R	ST8 alpha-N-acetyl-neuraminide alpha-2,8- sialyltransferase 1 [Source:HGNC Symbol;Acc:HGNC:10869]	100351155	G1T4S8
ENSOCUG00000015853	3683.551031	4825.398417	2541.703645	0.526734463	-0.92485224	0.002407349	0.26556776	11	15458278	15463047	-	324	-	GO:0005623;GO:0009055;GO:0009055;GO:0015035;GO:0015035;GO:0022900;GO:0045454;GO:0045454;GO:0055114;	K03676	-	O	0VJ4D;1D45U;0A88Q;1B67R;13W1I;0DUUX;0UVST;KOG1752	-	100344913	G1TAC4
ENSOCUG00000023301	25.61183636	41.23994724	9.983725473	0.242088706	-2.046392318	0.002430647	0.26556776	AAGW02081404	6590	6886	-	297	-	GO:0016020;GO:0016021;GO:0016651;GO:0016651;GO:0042773;GO:0042773;GO:0055114;GO:0055114;	-	-	C	0UW7V;0A9B7;1D555;KOG4669;0VKRH;1B6MX;13VC2;0DVUW	-	-	-
ENSOCUG00000003049	10.80465146	1.014559353	20.59474356	20.29920035	4.343350991	0.002446813	0.26556776	18	51948282	51989350	-	4191	COL17A1	GO:0016020;GO:0016021;GO:0030056;GO:0030056;GO:0031581;	K07603	-	W	09ZIT;0VA9S;0DM1W;1CU72;12SI9;KOG3544;0UQ4S;1B01F	collagen type XVII alpha 1 chain [Source:HGNC Symbol;Acc:HGNC:2194]	100339335	G1SIZ0
ENSOCUG00000004278	300.1201412	403.9984196	196.2418628	0.485749085	-1.041716816	0.002451443	0.26556776	14	139982108	141793895	-	5995	ROBO2	GO:0005515;GO:0001657;GO:0005515;GO:0007156;GO:0007420;GO:0009986;GO:0016020;GO:0016021;GO:0032870;GO:0042802;GO:0050772;GO:0050925;GO:0061364;GO:0005515;GO:0016020;GO:0016021;	K06754	-	T	12QAY;KOG4222;0DHE9;1AT2D;0UHFE;0V82Z;1CRQK;09X4G	roundabout guidance receptor 2 [Source:HGNC Symbol;Acc:HGNC:10250]	100345257	-
ENSOCUG00000007765	4728.147479	3254.460315	6201.834644	1.905641502	0.930276739	0.002473676	0.265720174	1	64697521	64728069	+	2602	PSAT1	GO:0003824;GO:0003824;GO:0004648;GO:0004648;GO:0004648;GO:0005829;GO:0006564;GO:0006564;GO:0006564;GO:0008483;GO:0008652;GO:0016740;GO:0003824;GO:0004648;GO:0006564;GO:0003824;GO:0004648;GO:0006564;	-	-	E	1CU7F;09Y1X;KOG2790;0DJEX;0UN5J;12QVY;0V8ZE;1B4EU	phosphoserine aminotransferase 1 [Source:HGNC Symbol;Acc:HGNC:19129]	-	-
ENSOCUG00000006039	420.0802104	284.3339742	555.8264465	1.954836554	0.967047988	0.002484096	0.265720174	14	6151947	6246091	+	2846	-	GO:0004402;GO:0005515;GO:0005634;GO:0006355;GO:0008080;GO:0016573;GO:0004402;GO:0005515;GO:0005634;GO:0006355;GO:0008080;GO:0016573;GO:0004402;GO:0005515;GO:0005634;GO:0006355;GO:0008080;GO:0016573;GO:0004402;GO:0005515;GO:0005634;GO:0006355;GO:0008080;GO:0016573;GO:0004402;GO:0005515;GO:0005634;GO:0006355;GO:0008080;GO:0016573;GO:0004402;GO:0004402;GO:0005515;GO:0005634;GO:0005634;GO:0006355;GO:…	K06062	EC:2.3.1.48	K;B	0DJU7;1CUMB;KOG1472;09YE2;0URZ4;0V9BR;12NNQ;1ASRG	-	100346295	-
ENSOCUG00000037789	877.6658521	406.7904047	1348.5413	3.315076472	1.729042151	0.002548325	0.270886972	15	62024434	62062841	+	1842	-	GO:0005524;GO:0016020;GO:0016021;GO:0016887;GO:0042626;GO:0055085;	-	-	-	-	-	-	-
ENSOCUG00000011364	175.3997709	110.3623929	240.4371488	2.178614857	1.123411174	0.002596914	0.272983624	7	172449370	172461299	+	1408	-	GO:0016020;GO:0016021;	K18265	-	S	0DGZ9;KOG4681;1AYWX;12PF0;1CRPF;09VQN;0V6PP;0UIYQ	-	100342370	-
ENSOCUG00000011017	980.3906945	677.2149317	1283.566457	1.895360538	0.922472306	0.00260015	0.272983624	16	68612590	68640712	-	1888	ADORA1	GO:0001609;GO:0001609;GO:0001609;GO:0001973;GO:0001973;GO:0002686;GO:0003093;GO:0004930;GO:0004930;GO:0004930;GO:0005886;GO:0005886;GO:0007165;GO:0007186;GO:0007186;GO:0007186;GO:0016020;GO:0016021;GO:0016021;GO:0016021;GO:0043197;GO:0045202;GO:0050728;GO:0051930;GO:0060079;GO:0070256;GO:1900453;GO:0001609;GO:0001973;GO:0004930;GO:0007186;GO:0016021;	K04265	-	T	KOG3656;1CWVD;12NPJ;0A0CG;1B0EM;0DIGQ;0URKR;0VB8K	Adenosine receptor A1 [Source:UniProtKB/Swiss- Prot;Acc:P34970]	100328615	P34970
ENSOCUG00000006343	693.8179063	438.5808839	949.0549286	2.16392224	1.113648657	0.002650211	0.275427477	1	56666965	56691156	-	1735	KLF9	GO:0003676;GO:0003676;GO:0005634;GO:0005654;GO:0005829;GO:0005886;GO:0007623;GO:0010839;GO:0071387;GO:0097067;	K09208	-	K	0V8PH;13MUN;KOG1721;1CTVV;0DJ3Z;09XRS;0UG5H;1AZ6I	Kruppel like factor 9 [Source:HGNC Symbol;Acc:HGNC:1123]	100341744	G1SQT6
ENSOCUG00000015260	661.9026862	418.8933721	904.9120004	2.160244255	1.111194444	0.002655815	0.275427477	19	43350055	43396300	+	3577	TUBG1	GO:0000212;GO:0000242;GO:0000794;GO:0000930;GO:0003924;GO:0005525;GO:0005737;GO:0005813;GO:0005813;GO:0005814;GO:0005827;GO:0005874;GO:0005876;GO:0005881;GO:0005929;GO:0007017;GO:0007020;GO:0031122;GO:0031252;GO:0036064;GO:0042802;GO:0045177;GO:0055037;GO:0097730;GO:0000930;GO:0003924;GO:0005525;GO:0005874;GO:0007017;GO:0007020;GO:0031122;GO:0000930;GO:0003924;GO:0005525;GO:0005874;GO:0007017;GO:…	K10389	-	-	-	tubulin gamma 1 [Source:HGNC Symbol;Acc:HGNC:12417]	100351097	G1T922
ENSOCUG00000015400	990.1709873	667.3254801	1313.016494	1.967580339	0.976422544	0.00268105	0.27635936	16	58656393	58848174	+	8501	PTPN14	GO:0005856;GO:0001946;GO:0001946;GO:0003712;GO:0004721;GO:0004725;GO:0004725;GO:0004725;GO:0004725;GO:0005634;GO:0005654;GO:0005737;GO:0005737;GO:0005856;GO:0005856;GO:0005856;GO:0006470;GO:0006470;GO:0008285;GO:0016311;GO:0016311;GO:0016787;GO:0016791;GO:0016791;GO:0030971;GO:0035335;GO:0046825;GO:1903506;GO:0004725;GO:0005856;GO:0006470;GO:0016311;GO:0016791;GO:0005856;	K18025	EC:3.1.3.48	T	0UNU4;KOG0792;0DJSJ;09YCQ;0V9A8;1CWZC;1B4YV;12R3J	protein tyrosine phosphatase non-receptor type 14 [Source:HGNC Symbol;Acc:HGNC:9647]	100356996	G1T9D2
ENSOCUG00000000802	69.49549928	38.82587706	100.1651215	2.579854702	1.367289815	0.00275403	0.282171956	10	14283409	14341487	+	2434	WIPF3	GO:0003779;GO:0003779;	-	-	Z	0J09R;13U8C;1B3C2;0UJ44;0DH32;09VUV;1CRTB;0V6TH	WAS/WASL interacting protein family member 3 [Source:HGNC Symbol;Acc:HGNC:22004]	-	-
ENSOCUG00000009827	1046.349278	1378.626569	714.0719876	0.517958963	-0.949090296	0.002791872	0.284336273	GL018715	2447345	2543367	+	3579	-	GO:0003924;GO:0005200;GO:0005525;GO:0005874;GO:0007017;GO:0003924;GO:0005200;GO:0005525;GO:0005874;GO:0007017;GO:0003924;GO:0005200;GO:0005525;GO:0005874;GO:0007017;GO:0003924;GO:0005200;GO:0005525;GO:0005874;GO:0007017;GO:0003924;GO:0005200;GO:0005525;GO:0005874;GO:0007017;GO:0003924;GO:0005200;GO:0005525;GO:0005874;GO:0007017;GO:0000166;GO:0003924;GO:0003924;GO:0003924;GO:0005200;GO:0005200;GO:…	K07375	-	Z	1ATQT;KOG1375;0V5GJ;12NDK;1CSK9;09UH7;0DHVM;0UI5E;1AY5V;KOG1375;0V5GJ;12NDK;1CSK9;09UH7;0DHVM;0UI5E	-	100349792	G1SY02
ENSOCUG00000013408	387.6083649	515.6292445	259.5874853	0.503438252	-0.990113257	0.002860256	0.288429313	12	140435834	140468677	+	1683	IYD	GO:0004447;GO:0005654;GO:0005886;GO:0005887;GO:0006570;GO:0010181;GO:0016020;GO:0016021;GO:0016491;GO:0016491;GO:0016491;GO:0030659;GO:0042403;GO:0055114;GO:0098869;	K17231	EC:1.21.1.1	C	1CSIU;1AV5R;0UPW3;12PYS;0V7HK;KOG3936;0DH3Y;09WJ0	iodotyrosine deiodinase [Source:HGNC Symbol;Acc:HGNC:21071]	100353029	G1T5C1
ENSOCUG00000022043	537.4497722	747.2034266	327.6961177	0.438563457	-1.18914249	0.002865978	0.288429313	9	3404062	3404469	+	408	-	GO:0003735;GO:0003735;GO:0005840;GO:0005840;GO:0006412;GO:0006412;	K02912	-	J	KOG0878	-	100359042	G1U437;G1TQK1
ENSOCUG00000009900	19.09003693	3.704656727	34.47541713	9.305968047	3.218156233	0.003016242	0.301766104	6	11696743	11731317	+	1991	ACSM3	GO:0003824;GO:0003824;GO:0005759;GO:0006633;GO:0015645;GO:0018729;GO:0047760;	K01896	EC:6.2.1.2	I	0UGF9;0DF8B;KOG1175;0V9V8;13HY5;1CPXY;1AZX6;09YXJ	acyl-CoA synthetase medium chain family member 3 [Source:HGNC Symbol;Acc:HGNC:10522]	100345414	G1SY52
ENSOCUG00000004393	102.4833398	144.8121614	60.15451824	0.415396868	-1.267437758	0.003148306	0.313136767	18	8740180	8807976	-	2588	-	GO:0019898;	K19914	-	T;U	13J7R;0A2DX;1AYDH;1CZ1V;0UTBK;0VD9K;KOG1028;0DQ18	-	100351528	G1SLQ1
ENSOCUG00000005238	184.3617056	80.9330968	287.7903144	3.555903898	1.830216335	0.003235619	0.319677713	14	79268554	79431666	+	3664	DGKG	GO:0003951;GO:0004143;GO:0004143;GO:0005509;GO:0007165;GO:0007205;GO:0016301;GO:0035556;GO:0046486;GO:0046834;GO:0000166;GO:0003951;GO:0003951;GO:0004143;GO:0004143;GO:0004143;GO:0005509;GO:0005509;GO:0005524;GO:0007165;GO:0007165;GO:0007205;GO:0007205;GO:0016301;GO:0016301;GO:0016301;GO:0016310;GO:0016740;GO:0035556;GO:0035556;GO:0003951;GO:0004143;GO:0005509;GO:0007165;GO:0007205;GO:0016301;GO:…	K00901	EC:2.7.1.107	T;I	0V832;0DIFK;1CT6B;1AWTA;12QU6;KOG1169;0UMAU;09X4J	diacylglycerol kinase gamma [Source:HGNC Symbol;Acc:HGNC:2853]	100344336	G1SNH9
ENSOCUG00000026532	3743.081001	2389.643068	5096.518934	2.132753214	1.092717038	0.003251661	0.319677713	2	41661929	41805171	+	3401	SCARA5	GO:0005044;GO:0005044;GO:0006897;GO:0016020;GO:0016020;GO:0016020;GO:0016021;GO:0005044;GO:0005887;GO:0005887;GO:0006879;GO:0006897;GO:0009986;GO:0016020;GO:0034605;GO:0034755;GO:0034755;GO:0070207;GO:0070287;GO:0070287;GO:0005044;GO:0016020;	K11856	EC:3.4.19.12	T;P	13K5T;09WWV;1CSXW;0DI7H;1B267;0V7V6;0IJVR;0UKMH	scavenger receptor class A member 5 [Source:HGNC Symbol;Acc:HGNC:28701]	100349984	-
ENSOCUG00000025113	296.2785861	393.0259164	199.5312558	0.50767964	-0.978009691	0.003273801	0.319685816	13	126607584	126613925	+	3311	MYCL	GO:0003677;GO:0003700;GO:0003700;GO:0005634;GO:0005634;GO:0005634;GO:0005654;GO:0006355;GO:0006355;GO:0045607;GO:0046983;GO:0046983;GO:0003700;GO:0005634;GO:0006355;	K09110	-	-	-	MYCL proto-oncogene, bHLH transcription factor [Source:HGNC Symbol;Acc:HGNC:7555]	100340331	G1U124
ENSOCUG00000002826	41.44309775	13.21998225	69.66621326	5.269766023	2.397738908	0.003310497	0.319685816	9	29320865	29839612	-	5267	-	GO:0016050;GO:0016079;GO:0016082;GO:0019901;GO:0031410;GO:0050432;GO:0098978;GO:0099525;GO:1990504;GO:0016079;GO:1990504;GO:0016079;GO:1990504;GO:0016079;GO:1990504;GO:0016079;GO:0016079;GO:0098793;GO:1990504;GO:1990504;GO:0016079;GO:1990504;GO:0016079;GO:1990504;	K19933	-	T;U	0DK44;1CUXW;0V6MU;12PDY;09VNY;0USAQ;KOG3543;1AYJ8	-	100359135	-
ENSOCUG00000001704	4.711518964	9.423037927	0	0	-Inf	0.003324526	0.319685816	9	54612147	54613052	-	906	LRRC30	GO:0005515;	-	-	T	KOG0619;0UFGN;1ARDA;0DEI6;1CP80;09T70;0V45R;12Q1S	leucine rich repeat containing 30 [Source:HGNC Symbol;Acc:HGNC:30219]	100339315	G1SFY7
ENSOCUG00000025061	54.39109475	24.75577807	84.02641143	3.394214119	1.763077578	0.003326928	0.319685816	6	26989695	26992144	+	1631	-	GO:0005576;GO:0005576;GO:0006955;GO:0006955;GO:0008009;GO:0008009;GO:0060326;	K21097	-	T	1B6CU;0VJU8;0A8UI;14561;0DV64;0UW27;1D4GH;0JCGF	-	100355784	G1SCU3
ENSOCUG00000010677	409.5351081	542.3873625	276.6828537	0.510120391	-0.971090323	0.003387794	0.323161977	13	36110449	36127850	+	4536	INSRR	GO:0000166;GO:0004672;GO:0004672;GO:0004713;GO:0004713;GO:0004713;GO:0004714;GO:0004714;GO:0004714;GO:0004714;GO:0005515;GO:0005524;GO:0005524;GO:0005524;GO:0005887;GO:0005887;GO:0006468;GO:0006468;GO:0007169;GO:0007169;GO:0016020;GO:0016020;GO:0016020;GO:0016021;GO:0016021;GO:0016021;GO:0016301;GO:0016310;GO:0016740;GO:0018108;GO:0030238;GO:0031532;GO:0043235;GO:0043548;GO:0043548;GO:0043560;GO:…	K05086	EC:2.7.10.1	T	12N8V;0V4I4;1CPJE;KOG1095;0USMT;1B2B9;KOG4258;09TJ5;0DEVU	insulin receptor related receptor [Source:HGNC Symbol;Acc:HGNC:6093]	100338576	G1SZT0
ENSOCUG00000004791	15.95884991	26.77673305	5.140966764	0.191993801	-2.380868362	0.003432768	0.323161977	8	178087	183511	-	1500	PCED1B	-	-	-	S	1D1K3;0DPAQ;0VD0B;12S47;09T7S;1B2E8;0UT45;0IGGE	PC-esterase domain containing 1B [Source:HGNC Symbol;Acc:HGNC:28255]	-	-
ENSOCUG00000014561	19.04851337	6.790775602	31.30625113	4.610114215	2.204802494	0.003433011	0.323161977	9	101780307	101894164	+	2635	CDH20	GO:0005509;GO:0005509;GO:0005886;GO:0005886;GO:0005886;GO:0007155;GO:0007155;GO:0007155;GO:0007156;GO:0007156;GO:0016020;GO:0016020;GO:0016020;GO:0016021;GO:0098609;GO:0098609;	K06807	-	Z;U	1ARXW;1CQ9F;KOG3594;13JCV;0DFJQ;09UA1;0UTTK;0V598	cadherin 20 [Source:HGNC Symbol;Acc:HGNC:1760]	100356628	G1T7M9
ENSOCUG00000000716	355.4697757	522.4718856	188.4676658	0.360723076	-1.471036377	0.003439106	0.323161977	8	52071159	52180286	+	1644	EPSTI1	-	-	-	U	13MS3;0VCSV;1CYIA;0DPJF;0A1XB;0USX9;0IVJX;1B1N9	epithelial stromal interaction 1 [Source:HGNC Symbol;Acc:HGNC:16465]	100351496	-
ENSOCUG00000006493	981.9106178	1464.865135	498.9561007	0.340615726	-1.553783052	0.003469149	0.32419386	13	139346737	139372998	+	947	-	GO:0031110;GO:0031110;GO:0031110;	K04381	-	-	-	-	100339005	-
ENSOCUG00000007482	96.26498401	142.3100501	50.21991796	0.352890874	-1.502705973	0.00348825	0.32419755	5	13525844	13537262	+	1701	CX3CL1	GO:0002523;GO:0005178;GO:0005576;GO:0005576;GO:0005576;GO:0005623;GO:0005886;GO:0006935;GO:0006955;GO:0006955;GO:0007155;GO:0008009;GO:0008009;GO:0008009;GO:0008009;GO:0008284;GO:0009986;GO:0009986;GO:0016020;GO:0016020;GO:0016021;GO:0016021;GO:0016021;GO:0016021;GO:0019221;GO:0019221;GO:0019221;GO:0030336;GO:0030593;GO:0031664;GO:0031737;GO:0032233;GO:0032914;GO:0033622;GO:0042056;GO:0042060;GO:…	K05508	-	W	0IJQZ;13MB9;1AUQD;1CVQZ;0DKVU;09UUQ;0UPY4;0VAAF	C-X3-C motif chemokine ligand 1 [Source:HGNC Symbol;Acc:HGNC:10647]	100346186	G1ST53
ENSOCUG00000038108	25.63574216	40.4529862	10.81849813	0.267433857	-1.902745974	0.003542561	0.327455863	GL018786	763405	764493	-	438	-	-	-	-	-	-	-	-	-
ENSOCUG00000009017	7073.331179	4684.567268	9462.095091	2.019844	1.014243873	0.003583857	0.32948242	1	70251553	70270135	-	2484	OGN	GO:0005515;GO:0005576;GO:0007165;GO:0008083;	K08126	-	T	KOG0619;135B8;1B0HJ;0DJ5X;0UNVI;1CTXU;0V8RG;09XTV	Oryctolagus cuniculus osteoglycin (OGN), mRNA. [Source:RefSeq mRNA;Acc:NM_001082116]	100008835	Q8MJF1
ENSOCUG00000005311	331.3045864	464.6907115	197.9184614	0.425914391	-1.231364618	0.003623363	0.330719677	GL018802	301914	313767	-	2305	IL17RE	GO:0030368;GO:0016020;GO:0016021;GO:0019221;GO:0030368;GO:0030368;	K05168	-	T	12Q6Q;0DQH4;0IFAR;0VDQQ;0UIP6;1CZJA;0A0A6;1ATCQ	interleukin 17 receptor E [Source:HGNC Symbol;Acc:HGNC:18439]	100350794	-
ENSOCUG00000029264	15.49396577	3.95588353	27.03204801	6.833378132	2.772598962	0.00364866	0.330719677	14	106933728	106957069	-	2986	-	GO:0016020;GO:0016021;	-	-	-	-	-	100349682	-
ENSOCUG00000014373	57.96045839	32.18031031	83.74060648	2.602231168	1.379749129	0.00365565	0.330719677	16	65224315	65313933	-	2664	-	-	K04002	-	S	0IF12;13IU3;0VCQJ;1AU7I;0A1UW;1CYFG;0DPH0;0UIQ3	-	100343920	-
ENSOCUG00000025898	725.9477945	494.8105594	957.0850295	1.934245362	0.951770814	0.003684314	0.331193548	21	12463053	12571701	-	3991	BICDL1	GO:0005813;GO:0017137;GO:0031175;GO:0034452;GO:0055107;	K16756	-	S	0DGS7;09VHJ;0IHTB;1ARQJ;1CRGA;0V6GU;12U82;0UIN5	BICD family like cargo adaptor 1 [Source:HGNC Symbol;Acc:HGNC:28095]	100347932	-
ENSOCUG00000007904	982.3139938	641.9351771	1322.692811	2.060477222	1.042978515	0.003699834	0.331193548	GL018787	256502	383019	-	4711	ADCY9	GO:0000166;GO:0001701;GO:0004016;GO:0004016;GO:0005887;GO:0006171;GO:0006171;GO:0007189;GO:0007189;GO:0009190;GO:0009190;GO:0016020;GO:0016020;GO:0016021;GO:0016021;GO:0016829;GO:0016849;GO:0016849;GO:0035556;GO:0035556;GO:0071880;	K08049	EC:4.6.1.1	-	-	adenylate cyclase 9 [Source:HGNC Symbol;Acc:HGNC:240]	100340877	-
ENSOCUG00000033676	893.5029488	606.069118	1180.93678	1.94851832	0.962377496	0.003781712	0.333247632	21	3561832	3565455	-	2006	SELENOM	-	-	-	-	-	selenoprotein M [Source:NCBI gene;Acc:100356324]	-	-
ENSOCUG00000022690	157.8130503	225.7662949	89.85980561	0.398021351	-1.329082273	0.003781937	0.333247632	12	49006650	49008077	+	1383	-	GO:0003824;GO:0003824;GO:0016740;GO:0016746;GO:0016747;GO:0016747;	-	-	I	0V834;1AW0E;0UKJF;0DI69;1CSWN;KOG1392;09X4M;12TBN	-	-	-
ENSOCUG00000017573	390.0450486	215.7778106	564.3122867	2.615247069	1.386947248	0.00379846	0.333247632	12	31536951	31635929	-	964	CCND3	GO:0005634;GO:0005634;GO:0000122;GO:0000307;GO:0001934;GO:0004693;GO:0005634;GO:0005634;GO:0005654;GO:0005737;GO:0005829;GO:0007165;GO:0016604;GO:0019901;GO:0019901;GO:0042098;GO:0042127;GO:0045737;GO:0046626;GO:0051726;	-	-	D	09WBY;0V7AD;1AU2C;1CSBQ;0DHMA;0UIEE;12TGV;KOG0656	cyclin D3 [Source:HGNC Symbol;Acc:HGNC:1585]	-	-
ENSOCUG00000026564	3033.872686	2112.105283	3955.64009	1.872842288	0.905229415	0.003801155	0.333247632	GL018791	847113	861595	-	1497	EFHD2	GO:0005509;GO:0005509;GO:0005509;	-	-	S	1DDEJ;KOG0041;0E6FY;0WDQ9;1458Y;0B15V;0V1QZ	EF-hand domain family member D2 [Source:HGNC Symbol;Acc:HGNC:28670]	-	-
ENSOCUG00000023753	242.9197369	323.6985117	162.1409621	0.500901167	-0.997402123	0.003932694	0.343011568	GL019553	10318	23276	-	2244	-	GO:0005737;GO:0005737;GO:0033925;GO:0033925;	K01227	EC:3.2.1.96	P;G	KOG2331;0DK4G;1AWT3;12SG4;0V9MR;09YPZ;0UN1R;1CUY8	-	100352061	-
ENSOCUG00000006248	100.3608236	61.71853798	139.0031093	2.252210014	1.171341362	0.003982486	0.34455877	GL018910	270113	317310	-	1886	-	GO:0016020;GO:0016021;GO:0035723;GO:0035723;GO:0042010;GO:0042010;GO:0035723;GO:0042010;	K05074	-	T	0A75H;1D3DX;0UVAZ;13Q4B;0VHP2;0DU22;1B4MV;0IWP4	-	100359262	G1SQM0
ENSOCUG00000007680	889.9661338	1178.345365	601.5869029	0.510535299	-0.969917381	0.003995902	0.34455877	14	83035105	83037663	+	831	-	-	-	-	T;U	13PC0;1B03R;09WVI;0UUMV;0DTMI;0IH22;0VEXE;1D1CR	-	-	-
ENSOCUG00000021002	15.71001782	5.196455139	26.2235805	5.046436426	2.335264979	0.004011209	0.34455877	GL018847	453615	456754	-	760	LCN2	GO:0005506;GO:0005506;GO:0005576;GO:0005615;GO:0005623;GO:0009615;GO:0009617;GO:0015891;GO:0036094;GO:0036094;GO:0042742;GO:0045087;GO:0097192;GO:0097577;GO:0120162;GO:1903981;	K21129	-	O;W	0VES9;0UTQK;1B5PN;0JAXJ;0DP2N;1CZK8;13TAW;0A3XE	lipocalin 2 [Source:HGNC Symbol;Acc:HGNC:6526]	100352980	G1TRW8
ENSOCUG00000001525	197.8726919	265.4849143	130.2604695	0.490651116	-1.027230552	0.004059392	0.346763358	11	81330409	81635012	-	3718	ADAMTS6	GO:0003279;GO:0004222;GO:0004222;GO:0006508;GO:0006508;GO:0007507;GO:0008233;GO:0008233;GO:0008237;GO:0008237;GO:0035904;GO:0060976;GO:0008233;	K08621	EC:3.4.24.-	O	KOG4597;0V69U;1AV5P;0UP96;1CV5Q;0DH5R;12PII;09U5N;KOG3538	ADAM metallopeptidase with thrombospondin type 1 motif 6 [Source:HGNC Symbol;Acc:HGNC:222]	100355552	G1SFL4
ENSOCUG00000009279	5490.386354	7132.87612	3847.896589	0.539459332	-0.89041389	0.00407765	0.346763358	1	8153228	8440613	+	10470	ABCA1	GO:0005524;GO:0016021;GO:0016887;GO:0042626;GO:0055085;GO:0002790;GO:0005102;GO:0005524;GO:0005524;GO:0005548;GO:0005768;GO:0005794;GO:0005886;GO:0005886;GO:0005887;GO:0005887;GO:0006497;GO:0006911;GO:0007040;GO:0007186;GO:0007189;GO:0008203;GO:0008203;GO:0009897;GO:0010875;GO:0016021;GO:0016197;GO:0016887;GO:0016887;GO:0019905;GO:0030139;GO:0031210;GO:0031267;GO:0032367;GO:0032489;GO:0033344;GO:…	K05641	-	Q	0V4GH;12P2M;1CWAS;KOG0059;09THI;1AUWY;0DMFG;0UJE3	ATP binding cassette subfamily A member 1 [Source:HGNC Symbol;Acc:HGNC:29]	100356765	-
ENSOCUG00000024555	643.4648742	440.5593381	846.3704103	1.921126934	0.941952845	0.004131458	0.349591263	8	78584349	78586031	-	1356	KCTD12	GO:0005515;GO:0042802;GO:0051260;GO:0051260;	-	-	S;G	1AWB4;1CVUH;13I8F;KOG2723;0V5CN;09XVV;0DKZQ;0UI5J	potassium channel tetramerization domain containing 12 [Source:HGNC Symbol;Acc:HGNC:14678]	-	-
ENSOCUG00000007857	220.0138549	147.9082417	292.1194681	1.97500467	0.981856065	0.004173302	0.351383763	8	5508156	5670963	-	8357	LRRK2	GO:0000149;GO:0000165;GO:0000186;GO:0000187;GO:0000287;GO:0001933;GO:0001934;GO:0003779;GO:0003924;GO:0004672;GO:0004672;GO:0004672;GO:0004672;GO:0004674;GO:0004674;GO:0004708;GO:0005096;GO:0005515;GO:0005524;GO:0005524;GO:0005525;GO:0005525;GO:0005525;GO:0005623;GO:0005654;GO:0005737;GO:0005739;GO:0005741;GO:0005743;GO:0005759;GO:0005764;GO:0005768;GO:0005783;GO:0005783;GO:0005794;GO:0005794;GO:…	K08844	EC:2.7.11.1	T	KOG0619;12STJ;0V5UM;0UMDH;KOG0192;1CTHU;09UV1;1AWVX;0DISN	leucine rich repeat kinase 2 [Source:HGNC Symbol;Acc:HGNC:18618]	100343394	-
ENSOCUG00000006165	5114.320951	7143.633897	3085.008006	0.431854159	-1.211383913	0.004295349	0.358215944	1	114085284	114180830	+	1859	-	GO:0016020;GO:0016021;	-	-	S	0DUK0;0UVJZ;0J1SC;0VJKU;0A8Q7;1D3SW;1B621;13V0I	-	-	-
ENSOCUG00000013425	471.5212111	326.6458239	616.3965984	1.887048764	0.916131705	0.004296569	0.358215944	12	128813690	128821422	+	1489	HEBP2	GO:0005737;GO:0005737;GO:0005739;GO:0010917;GO:0010940;GO:0035794;	-	-	S	0UIR6;0DGUG;0V6J1;09VJW;13JNW;1B4AK;0IZTQ;1CRIK	heme binding protein 2 [Source:HGNC Symbol;Acc:HGNC:15716]	100350755	G1T5D2
ENSOCUG00000004158	1641.651548	1157.382422	2125.920674	1.836835115	0.877222127	0.004636981	0.384711062	3	15351327	15442156	+	3290	SLC22A5	GO:0009609;GO:0015226;GO:0015651;GO:0015697;GO:0015879;GO:0016021;GO:0016324;GO:0022857;GO:0030165;GO:0031526;GO:0055085;GO:0060731;GO:0070715;GO:0016020;GO:0016021;GO:0016021;GO:0016021;GO:0022857;GO:0022857;GO:0055085;GO:0055085;GO:0016021;GO:0022857;GO:0055085;GO:0016020;GO:0016021;GO:0016021;GO:0016021;GO:0022857;GO:0022857;GO:0055085;GO:0055085;	K08202	-	P;G	0V3E7;0WHRU;13E7R;0IRIE;1DFNB;0E8R6;1BB72;0B55R;0V3E6;0WHRU;13E7R;0IRIE;1DFNB;0E8R6;1BB71;0B55R	Oryctolagus cuniculus solute carrier family 22 (organic cation/zwitterion transporter), member 4 (SLC22A4), mRNA. [Source:RefSeq mRNA;Acc:NM_001171346]	100358417	-
ENSOCUG00000015959	5.652772962	10.97450343	0.331042498	0.03016469	-5.050995417	0.004672366	0.385765064	14	84777195	85007113	+	879	TPRG1	GO:0005737;	-	-	S	1ASZR;0A22I;1CRQF;12PFN;0IEMY;0USEX;0DH05;0V6QI	tumor protein p63 regulated 1 [Source:HGNC Symbol;Acc:HGNC:24759]	100355063	-
ENSOCUG00000000140	7470.077801	9885.78102	5054.374581	0.511277214	-0.967822363	0.004755193	0.387569929	GL018820	207567	466362	+	3686	AP3B1	GO:0006886;GO:0006886;GO:0015031;GO:0016020;GO:0016192;GO:0016192;GO:0030117;GO:0030117;GO:0030123;GO:0030123;GO:0030123;GO:0006622;GO:0006886;GO:0007596;GO:0008089;GO:0016182;GO:0016192;GO:0019882;GO:0019903;GO:0030117;GO:0030123;GO:0030742;GO:0032438;GO:0048007;GO:0048490;GO:0051138;GO:0006886;GO:0016192;GO:0030117;GO:0030123;GO:0006886;GO:0016192;GO:0030117;GO:0030123;GO:0006886;GO:0016192;GO:…	K12397	-	U	09VEP;1AU2B;12P8U;KOG1060;0UIID;0DGPJ;1CRDD;0V6DU	adaptor related protein complex 3 subunit beta 1 [Source:HGNC Symbol;Acc:HGNC:566]	100350054	-
ENSOCUG00000000109	2417.675954	1707.702116	3127.649793	1.831496116	0.873022642	0.004780545	0.387569929	9	31612727	31785208	-	7348	ADAMTS9	GO:0004222;GO:0004222;GO:0005783;GO:0006508;GO:0006508;GO:0006508;GO:0008237;GO:0008237;GO:0008237;GO:0008270;GO:0008270;GO:0016020;GO:0016021;GO:0031012;GO:0043231;GO:0004222;GO:0006508;GO:0008237;GO:0008270;GO:0004222;GO:0006508;GO:0008237;GO:0008270;GO:0004222;GO:0006508;GO:0008237;GO:0008270;GO:0004222;GO:0006508;GO:0008237;GO:0008270;GO:0004222;GO:0006508;GO:0008237;GO:0008270;GO:0004222;GO:…	-	-	O	0V69U;1CU9C;0DJGU;1AZQ6;12PII;09U5N;0UIUN;KOG3538	ADAM metallopeptidase with thrombospondin type 1 motif 9 [Source:HGNC Symbol;Acc:HGNC:13202]	100339560	-
ENSOCUG00000024595	6.926626971	0	13.85325394	Inf	Inf	0.004803066	0.387569929	3	134967647	135021503	+	1333	COLEC10	GO:0005537;GO:0005581;GO:0005615;GO:0005737;GO:0042056;GO:0050918;GO:1904888;	K10065	-	W	0KDF4;0E5V9;1BA3W;1DCUU;0B0EN;14TMA;0V19M;0WCXT	collectin subfamily member 10 [Source:HGNC Symbol;Acc:HGNC:2220]	100351735	G1U0D7
ENSOCUG00000000353	692.5231228	479.2236156	905.82263	1.890187796	0.918529578	0.004806623	0.387569929	13	37485700	37490405	-	1420	MTX1	GO:0001401;GO:0001401;GO:0001401;	K17776	-	U	0V4MM;1CPNN;0DEYY;09TNI;1B1DH;KOG3028;12QCQ;0UGC0	metaxin 1 [Source:HGNC Symbol;Acc:HGNC:7504]	100357146	-
ENSOCUG00000007081	84.91598845	117.3998324	52.43214447	0.446611749	-1.162906891	0.00482892	0.387569929	14	97116416	97170142	-	1671	EAF2	GO:0006355;GO:0032783;GO:0000977;GO:0001228;GO:0005654;GO:0006355;GO:0006355;GO:0008023;GO:0030308;GO:0032783;GO:0032783;GO:0045893;GO:0045944;GO:0060770;	K15186	-	K	0USCM;1CXYH;0DP0Q;KOG4795;0VC8M;13SF1;0A1D4;1AXIW	ELL associated factor 2 [Source:HGNC Symbol;Acc:HGNC:23115]	100338761	G1SSB8
ENSOCUG00000023010	82.09266273	42.43458213	121.7507433	2.869139679	1.520618205	0.004844236	0.387569929	16	66778631	66785306	+	2240	KLHDC8A	GO:0005515;	-	-	S;J	1ARQ5;12SUR;KOG1072;0V4JT;09TKT;0DEXD;1CPM1;0UR07	kelch domain containing 8A [Source:HGNC Symbol;Acc:HGNC:25573]	100349092	G1TXQ9
ENSOCUG00000016581	1456.408176	963.942572	1948.873781	2.021773742	1.015621553	0.004870691	0.387569929	10	22812538	22845149	+	1083	-	GO:0000166;GO:0003924;GO:0003924;GO:0005525;GO:0005525;GO:0005525;GO:0005886;GO:0005886;GO:0007165;GO:0007165;GO:0007265;GO:0007265;GO:0016020;GO:0016020;GO:0003924;GO:0005525;GO:0005886;GO:0007165;GO:0007265;GO:0016020;	K07834	-	S;J;U	0V4MC;0DEYQ;12UAZ;0US22;1B3AQ;09TNB;1CQUG;KOG0395	-	100354283	G1TBX7
ENSOCUG00000029231	1648.701878	1091.509348	2205.894408	2.020957872	1.015039248	0.004942641	0.387569929	3	53900261	54008316	+	3377	-	GO:0016020;GO:0016021;	-	-	-	-	-	-	-
ENSOCUG00000004023	112.5991271	175.9905559	49.20769833	0.279604198	-1.838542071	0.004954287	0.387569929	16	63003004	63003300	-	297	G0S2	GO:0005739;GO:0016020;GO:0016021;GO:0097191;GO:0120162;GO:2001238;	-	-	T	1B6JG;1D4W0;0J22N;0VKCE;0UW8G;0A9FN;0DVM8;13UQ8	G0/G1 switch 2 [Source:HGNC Symbol;Acc:HGNC:30229]	100342650	G1SKX3
ENSOCUG00000016205	299.9760928	175.365596	424.5865895	2.421151008	1.275693063	0.004989719	0.387569929	GL018849	37607	130013	-	1166	HOMER2	GO:0003779;GO:0005737;GO:0005737;GO:0005829;GO:0007605;GO:0008277;GO:0014069;GO:0030160;GO:0032426;GO:0032703;GO:0035584;GO:0045177;GO:0048148;GO:0048875;GO:0070885;GO:0098978;	-	-	Z;T	0A1V1;0UHKK;0DG0M;0IGRQ;0VCQN;1CPU7;12W5Q;1AT79	homer scaffold protein 2 [Source:HGNC Symbol;Acc:HGNC:17513]	-	-
ENSOCUG00000017723	548.4152624	357.5904639	739.240061	2.06728125	1.047734678	0.004990613	0.387569929	7	132318503	132330388	-	2081	CAVIN2	GO:0001786;GO:0005654;GO:0005737;GO:0005829;GO:0005886;GO:0005901;GO:0005901;GO:0005901;GO:0045121;GO:0097320;	-	-	S	0DHXF;12Q0R;1ARZ1;0IEZA;0V71V;09WMY;1CSN5;0UG5X	caveolae associated protein 2 [Source:HGNC Symbol;Acc:HGNC:10690]	100345238	G1TEA3
ENSOCUG00000026751	2167.516494	2769.473737	1565.559251	0.565291243	-0.822933747	0.004991946	0.387569929	8	24989921	25069772	+	1742	PLBD1	GO:0004620;GO:0004620;GO:0005615;GO:0006629;GO:0016042;GO:0016787;GO:0004620;	-	-	T	1D0GN;KOG3774;09X2S;0DRB7;0V810;12TDW;1ATHN;0UH3H	phospholipase B domain containing 1 [Source:HGNC Symbol;Acc:HGNC:26215]	100347232	G1THB5
ENSOCUG00000013547	17239.18002	11036.28376	23442.07627	2.124091478	1.0868459	0.005005563	0.387569929	GL018780	797563	846793	+	3063	OAT	GO:0003824;GO:0004587;GO:0008483;GO:0030170;GO:0003824;GO:0004587;GO:0008483;GO:0030170;GO:0003824;GO:0004587;GO:0005654;GO:0005739;GO:0008483;GO:0030170;GO:0034214;GO:0003824;GO:0003824;GO:0004587;GO:0004587;GO:0008483;GO:0008483;GO:0030170;GO:0030170;	K00819	EC:2.6.1.13	E	09TM9;KOG1402;1B26X;0V4K9;12N9Y;0DEXR;1CPMF;0UG0G	ornithine aminotransferase [Source:HGNC Symbol;Acc:HGNC:8091]	100341650	G1T5M0
ENSOCUG00000008012	511.3203207	826.9778661	195.6627752	0.236599773	-2.079479407	0.00501975	0.387569929	3	69407144	69408250	-	453	-	GO:0031110;GO:0031110;	K04381	-	Z	0DPQ4;13PR2;0IN6S;1B1CD;0A222;1CYP6;0UT12;0VCXE	-	100358241	G1SU98
ENSOCUG00000003510	39.70421187	8.883885595	70.52453815	7.938478877	2.988862593	0.005036039	0.387569929	17	78036010	78397189	+	3026	OCA2	GO:0005765;GO:0005789;GO:0007286;GO:0008283;GO:0010008;GO:0016020;GO:0016021;GO:0016021;GO:0016021;GO:0030318;GO:0033162;GO:0042438;GO:0043473;GO:0048066;GO:0055085;GO:0055085;GO:0016021;GO:0055085;	-	-	P	KOG2639;0URST;0VAVE;0DNFB;12QRX;1CQF6;1AWK0;09ZU0	OCA2 melanosomal transmembrane protein [Source:HGNC Symbol;Acc:HGNC:8101]	100340522	G1SJV9
ENSOCUG00000006752	615.5912078	276.5292018	954.6532139	3.452269083	1.787544918	0.005114285	0.391389882	7	14135130	14148522	-	2595	MEST	GO:0003824;GO:0003824;GO:0003824;GO:0016020;GO:0016021;GO:0003824;	-	-	I	13BR3;0INNB;0E7SD;1DES9;0B3M4;1BAS9;0WG0X;0V2U2	mesoderm specific transcript [Source:HGNC Symbol;Acc:HGNC:7028]	100349576	G1SRM7
ENSOCUG00000007013	141.8419741	203.8555874	79.82836071	0.391592704	-1.352574209	0.005131699	0.391389882	19	12009422	12013110	-	1818	SLC16A13	GO:0005794;GO:0005829;GO:0005887;GO:0016020;GO:0016021;GO:0055085;GO:0055085;	K08189	-	G	1440K;0E6PD;0B1G4;0V1VQ;KOG2504;0WE21;1DDMG	solute carrier family 16 member 13 [Source:HGNC Symbol;Acc:HGNC:31037]	100340272	G1SS71
ENSOCUG00000026607	155.4893642	208.7051951	102.2735332	0.490038272	-1.029033667	0.00529093	0.401515147	21	5558228	5561804	-	621	-	GO:0046872;	-	-	S;U	13RB7;0UUX0;0DTKJ;1D2Y1;1B5KX;0A6KJ;KOG3399;0VHEM	-	100344763	G1U785
ENSOCUG00000029603	205.2748949	273.9390058	136.610784	0.498690516	-1.00378333	0.005311671	0.401515147	GL018951	294033	301405	-	1941	ZNF74	GO:0003676;GO:0005654;GO:0006355;GO:0015629;GO:0003676;GO:0003676;GO:0006355;	-	-	-	-	zinc finger protein 74 [Source:HGNC Symbol;Acc:HGNC:13144]	-	-
ENSOCUG00000024977	13.84071562	23.37231433	4.309116905	0.18436843	-2.439336453	0.005347399	0.402427269	GL018746	596597	631635	-	2241	ACSBG1	GO:0000038;GO:0001676;GO:0003824;GO:0003824;GO:0004467;GO:0005737;GO:0005783;GO:0005886;GO:0031957;GO:0051384;	K15013	EC:6.2.1.3	-	-	acyl-CoA synthetase bubblegum family member 1 [Source:HGNC Symbol;Acc:HGNC:29567]	100338354	-
ENSOCUG00000023580	89.80024702	131.5910145	48.0094795	0.364838585	-1.454669781	0.005525675	0.411863986	17	30625711	30627736	-	1332	ITPKA	GO:0006020;GO:0016301;GO:0016301;GO:0016301;GO:0016310;GO:0016740;GO:0032958;GO:0032958;GO:0048167;	-	-	I	0UY7H;1D7WA;0AFF1;131AE;0DZBW;KOG1621;0VSNX	inositol-trisphosphate 3-kinase A [Source:HGNC Symbol;Acc:HGNC:6178]	-	-
ENSOCUG00000011502	519.5628237	177.0706023	862.0550451	4.868425555	2.283455281	0.005532241	0.411863986	AAGW02082447	21	10446	+	1961	-	-	-	-	S	1D436;0DUSB;13XQM;0A7HD;0J4VC;1B66M;0UVSK;0VJ2E	-	-	-
ENSOCUG00000016317	51.847545	22.95848424	80.73660577	3.51663485	1.81419554	0.005545441	0.411863986	14	105803138	105920933	+	5777	CFAP44	GO:0005515;GO:0007288;GO:0007288;GO:0030317;	-	-	S	0V3IG;1BB9V;13EWW;0WI8K;0B5KV;1DFW2;0E8ZU;0IS9Z	cilia and flagella associated protein 44 [Source:HGNC Symbol;Acc:HGNC:25631]	100348161	-
ENSOCUG00000010384	272.8631698	359.4071431	186.3191965	0.518407049	-0.947842759	0.005579628	0.412601396	GL018737	1521439	1657701	-	4899	IL16	GO:0005125;GO:0005515;GO:0005125;GO:0005125;GO:0005515;GO:0005829;GO:0005886;GO:0016607;GO:0030595;GO:0042609;GO:0050930;GO:0051924;GO:0090543;GO:0005125;GO:0005125;GO:0005125;GO:0005515;GO:0005576;GO:0005615;GO:0005634;GO:0005737;GO:0006935;GO:0007165;	-	-	O;K	KOG3528;0UQQ6;0DMHJ;1B03N;13HVQ;0VAUY;1CWCV;09ZY8	interleukin 16 [Source:HGNC Symbol;Acc:HGNC:5980]	-	-
ENSOCUG00000011880	1170.379391	1507.98592	832.7728617	0.552241802	-0.856627998	0.005730187	0.420883948	1	79074761	79146826	-	2128	SPIN1	GO:0005634;GO:0005654;GO:0005730;GO:0005829;GO:0007276;GO:0007276;GO:0009303;GO:0030177;GO:0031965;GO:0035064;GO:0045893;	-	-	Z;S	12SXQ;0DN6Y;0IGUH;0UT51;0VAQG;0A0JP;1B1ED;1CX3J	spindlin 1 [Source:HGNC Symbol;Acc:HGNC:11243]	100352123	G1T257
ENSOCUG00000012386	634.245488	812.2808555	456.2101206	0.561640863	-0.83228019	0.005751195	0.420883948	14	78614183	78650929	-	1603	DCUN1D1	GO:0000151;GO:0005515;GO:0005654;GO:0005829;GO:2000436;GO:0005515;	K17822	-	S;J;I	1AU0H;1CUZD;0UP25;09YJU;12SZ5;0DK5K;KOG3077;0V9HJ	defective in cullin neddylation 1 domain containing 1 [Source:HGNC Symbol;Acc:HGNC:18184]	100351019	-
ENSOCUG00000006426	254.5839682	169.6649509	339.5029856	2.001020151	1.000735696	0.005765873	0.420883948	13	138380516	138386296	+	1287	-	GO:1990817;GO:1990817;	K23033	EC:2.7.7.-	S	0UHXG;1CY8N;12P1E;1AYDA;0V8F9;KOG3852;09XC6;0DPAN	-	100343579	G1SQZ3
ENSOCUG00000008657	626.0848528	393.8979832	858.2717223	2.178918804	1.123612436	0.005808561	0.422188035	2	158957495	158963170	+	1184	CGREF1	GO:0005509;GO:0005509;GO:0005509;	-	-	T	1AYT4;0DKXB;13Y3T;0J4PJ;0UMDJ;1CZV4;0VFCK;0A0IN	cell growth regulator with EF-hand domain 1 [Source:HGNC Symbol;Acc:HGNC:16962]	100351477	G1SVL4
ENSOCUG00000005759	895.2459928	1150.337473	640.1545121	0.556492792	-0.845565094	0.005863217	0.424347188	13	44692974	44797394	-	2668	PHGDH	GO:0004617;GO:0004617;GO:0004617;GO:0006541;GO:0006544;GO:0006563;GO:0006564;GO:0006564;GO:0006564;GO:0006566;GO:0008652;GO:0009448;GO:0010468;GO:0016491;GO:0016616;GO:0016616;GO:0019530;GO:0021510;GO:0021782;GO:0021915;GO:0022008;GO:0031175;GO:0051287;GO:0051287;GO:0051287;GO:0055114;GO:0055114;GO:0055114;GO:0070314;GO:0004617;GO:0006564;GO:0016616;GO:0051287;GO:0055114;GO:0016616;GO:0051287;GO:…	K00058	-	E	0VBH8;0DRHU;1CPWW;12RXE;0UKUA;KOG0068;1ATFQ;0A0M1	phosphoglycerate dehydrogenase [Source:HGNC Symbol;Acc:HGNC:8923]	100344669	G1SPL1
ENSOCUG00000033845	1150.402479	1468.250586	832.554372	0.567038338	-0.818481815	0.006176927	0.445157517	X	87172296	87173548	+	524	-	GO:0003785;GO:0007015;	-	-	-	-	-	-	-
ENSOCUG00000013181	46.48772657	14.7917485	78.18370465	5.285629665	2.402075347	0.006253313	0.447418633	9	41856160	42171446	-	3343	CNTN3	GO:0005515;	K06761	-	T	1CT2J;1ARQS;12P91;0DHM2;KOG3513;0UFW7;09X1D;0V64Z	contactin 3 [Source:HGNC Symbol;Acc:HGNC:2173]	100353847	-
ENSOCUG00000000026	4.166501553	8.333003106	0	0	-Inf	0.006260915	0.447418633	X	16343208	16348168	-	1511	NR0B1	GO:0000122;GO:0003677;GO:0003677;GO:0003677;GO:0003707;GO:0003707;GO:0003714;GO:0003714;GO:0003723;GO:0003723;GO:0004879;GO:0005634;GO:0005634;GO:0005634;GO:0005634;GO:0005634;GO:0005654;GO:0005737;GO:0005737;GO:0006355;GO:0006355;GO:0006694;GO:0007283;GO:0007530;GO:0008104;GO:0008134;GO:0008134;GO:0008406;GO:0008584;GO:0008584;GO:0016020;GO:0016607;GO:0019904;GO:0030154;GO:0030238;GO:0030325;GO:…	K08562	-	K	0DKY4;12RZ6;0VACM;0UQMV;KOG3575;09ZFJ;1CVT4;1AT88	nuclear receptor subfamily 0 group B member 1 [Source:HGNC Symbol;Acc:HGNC:7960]	100358557	G1SCF9
ENSOCUG00000003638	23.98104085	37.11463678	10.84744491	0.292268653	-1.77463299	0.006566397	0.464028019	17	79487698	79720557	+	1706	GABRB3	GO:0004888;GO:0004888;GO:0004890;GO:0004890;GO:0004890;GO:0004890;GO:0005216;GO:0005216;GO:0005230;GO:0005230;GO:0005886;GO:0005886;GO:0005886;GO:0005887;GO:0006811;GO:0006811;GO:0006811;GO:0007214;GO:0007605;GO:0016020;GO:0016020;GO:0016020;GO:0016021;GO:0016021;GO:0016021;GO:0022851;GO:0022851;GO:0034220;GO:0034220;GO:0042802;GO:0043523;GO:0043524;GO:0048666;GO:0060021;GO:0060080;GO:0060119;GO:…	K05181	-	T	12PJU;1CS2U;0V71Z;0DHCM;KOG3643;1B4A6;0UQJW;09W3H	gamma-aminobutyric acid type A receptor beta3 subunit [Source:HGNC Symbol;Acc:HGNC:4083]	100341200	-
ENSOCUG00000002553	17057.36838	12281.05592	21833.68083	1.777834168	0.830120759	0.006581108	0.464028019	9	59137437	59201529	-	4155	EMILIN2	GO:0005515;GO:0005576;	-	-	S	1CTVS;12QPY;0V8PG;0UIT5;0DJ3W;09XRR;0IFE8;1AU9W	elastin microfibril interfacer 2 [Source:HGNC Symbol;Acc:HGNC:19881]	100339562	G1SHT1
ENSOCUG00000039590	1719.272438	1230.622419	2207.922457	1.794151011	0.843301325	0.006581134	0.464028019	11	42033687	42062502	+	759	BASP1	GO:0003714;GO:0005634;GO:0005737;GO:0005886;GO:0008180;GO:0019904;GO:0030054;GO:0045892;	-	-	-	-	brain abundant membrane attached signal protein 1 [Source:HGNC Symbol;Acc:HGNC:957]	-	-
ENSOCUG00000037070	64.78968829	38.15524625	91.42413033	2.396109036	1.26069356	0.006611697	0.464028019	12	98985664	99001176	+	1720	-	GO:0005887;GO:0055085;GO:0005887;GO:0055085;	-	-	-	-	-	-	-
ENSOCUG00000016676	62.9375067	36.7652194	89.10979399	2.423752542	1.277242411	0.006648012	0.464028019	GL018731	2073008	2130761	-	3846	MAMLD1	GO:0005654;GO:0005794;GO:0005813;GO:0008584;GO:0016604;	K19512	-	K	0DKQ8;0VA5F;13H8J;0IF3V;1B32T;0UPQP;09Z85;1CVIT	mastermind like domain containing 1 [Source:HGNC Symbol;Acc:HGNC:2568]	103352437	-
ENSOCUG00000009113	8.216423231	1.563363827	14.86948264	9.51121062	3.249628984	0.006684075	0.464028019	10	15934034	16473294	-	4160	PDE1C	GO:0004114;GO:0005929;GO:0007165;GO:0007608;GO:0008081;GO:0004114;GO:0007165;GO:0008081;GO:0004114;GO:0007165;GO:0008081;GO:0004114;GO:0007165;GO:0008081;GO:0004114;GO:0007165;GO:0008081;GO:0004114;GO:0007165;GO:0008081;GO:0004114;GO:0007165;GO:0008081;GO:0004114;GO:0007165;GO:0008081;GO:0004114;GO:0004114;GO:0007165;GO:0007165;GO:0008081;GO:0008081;GO:0016787;GO:0046872;	K13755	EC:3.1.4.17	T	0UQGZ;09UJP;1B2NP;0DFVA;0V5IU;12QGU;KOG3688;1CQIP	phosphodiesterase 1C [Source:HGNC Symbol;Acc:HGNC:8776]	100347155	-
ENSOCUG00000004433	7.512760984	1.219435286	13.80608668	11.32170509	3.501019344	0.006696315	0.464028019	12	11097424	11115769	+	1671	SLC17A2	GO:0005887;GO:0016020;GO:0016021;GO:0055085;GO:0055085;GO:0005887;GO:0055085;GO:0005887;GO:0055085;	K12300	-	P;G	1CTVT;12PZZ;1B0CM;0V45C;0UGY5;KOG2532;0DJ3X;09T6K	solute carrier family 17 member 2 [Source:HGNC Symbol;Acc:HGNC:10930]	100350496	G1SLT3
ENSOCUG00000006726	15.2590448	3.372212366	27.14587723	8.049871798	3.008965807	0.006716203	0.464028019	AAGW02082138	1997	15798	+	2638	-	-	-	-	S	1D436;0DUSB;13XQM;0A7HD;0J4VC;1B66M;0UVSK;0VJ2E	-	-	-
ENSOCUG00000008758	540.2715031	696.0298208	384.5131854	0.552437803	-0.856116048	0.006749244	0.464028019	GL019240	20923	34141	+	2224	TEAD2	GO:0001134;GO:0001223;GO:0003677;GO:0003700;GO:0003700;GO:0003700;GO:0003700;GO:0005634;GO:0005654;GO:0005829;GO:0006355;GO:0006355;GO:0035329;GO:0035329;GO:0043231;GO:0045893;GO:0046982;GO:0065003;GO:0071149;GO:0097718;	-	-	K	12RVX;09THZ;0UN52;KOG3841;1CW38;0DM83;0V4GX;1AUSZ	TEA domain transcription factor 2 [Source:HGNC Symbol;Acc:HGNC:11715]	-	-
ENSOCUG00000007569	508.689149	359.0394199	658.3388782	1.833611692	0.874688149	0.006766166	0.464028019	7	9175077	9196502	+	2473	KEL	GO:0004222;GO:0004222;GO:0005654;GO:0005829;GO:0005886;GO:0006508;GO:0006874;GO:0008237;GO:0008237;GO:0008361;GO:0010961;GO:0016020;GO:0031133;GO:0042552;GO:0048741;GO:1901380;GO:0004222;GO:0004222;GO:0006508;GO:0006508;GO:0008237;GO:0008237;GO:0016020;GO:0016021;GO:0004222;GO:0006508;GO:0008237;	K06577	EC:3.4.24.-	E	0UGNV;1B1WX;KOG3624;0VDSS;1CZMT;0DNJQ;13NP6;0A2XJ	Kell metallo-endopeptidase (Kell blood group) [Source:HGNC Symbol;Acc:HGNC:6308]	100339724	G1STB9
ENSOCUG00000009991	44.91216179	17.54508667	72.2792369	4.119628376	2.042514201	0.006905915	0.471710047	9	30686539	30687354	+	759	-	GO:0005764;GO:0005765;GO:0005768;GO:0016020;GO:0016021;GO:0016787;GO:0031902;GO:0034597;GO:0034597;GO:0046856;GO:0046856;	-	-	S	1CTI2;KOG4684;0V4CH;13MEY;09XF4;0DISU	-	-	-
ENSOCUG00000014695	507.9058407	341.0225757	674.7891057	1.978722682	0.984569433	0.006999118	0.476163984	GL018951	41193	47005	+	1254	P2RX6	GO:0000166;GO:0001614;GO:0001614;GO:0001614;GO:0004931;GO:0004931;GO:0004931;GO:0005216;GO:0005216;GO:0005524;GO:0005524;GO:0005524;GO:0005737;GO:0005887;GO:0005887;GO:0005887;GO:0006811;GO:0006811;GO:0006811;GO:0016020;GO:0016020;GO:0016020;GO:0016021;GO:0030054;GO:0033198;GO:0033198;GO:0035590;GO:0043235;GO:0060079;GO:0098655;GO:0098655;GO:0098794;	K05221	-	P	1CRZS;0IFJF;09Y1W;0V8ZD;1AUV8;0DH9T;12QBX;0UIJ8	purinergic receptor P2X 6 [Source:HGNC Symbol;Acc:HGNC:8538]	100349719	-
ENSOCUG00000007445	198.0732625	36.44442739	359.7020977	9.869879249	3.303032434	0.007062464	0.478377768	3	97128709	97159707	-	2762	-	GO:0005504;GO:0008289;GO:0050727;GO:0005504;GO:0005737;GO:0008289;GO:0008289;GO:0008289;GO:0015485;GO:0043209;GO:0043209;GO:0061024;GO:0061024;GO:0008289;GO:0005504;GO:0008289;GO:0008289;GO:0050727;GO:0005504;GO:0005504;GO:0008289;GO:0008289;GO:0050727;GO:0050727;	-	-	K;I	0DUHR;0UVC6;1B5TN;1D3VE;KOG4015;0VIKM;0A7FN;13SDY;1D302;0UUZX;13QG7;KOG4015;1B5HQ;0VHGU;0DTNB;0A7EJ	Myelin P2 protein [Source:UniProtKB/Swiss- Prot;Acc:P02691]	100009045	P02691
ENSOCUG00000029359	490.5658352	630.6587191	350.4729514	0.555725214	-0.847556397	0.007087911	0.478377768	7	120823894	121196072	+	2811	-	GO:0000166;GO:0005524;GO:0016740;	-	-	-	-	-	-	-
ENSOCUG00000008905	1401.787382	909.01322	1894.561545	2.08419581	1.059490825	0.007230028	0.486040777	20	14870884	15088272	+	2411	-	GO:0005515;	K21843	-	T	0DHDG;0UJHT;09W4D;0V72Q;12PKA;KOG4162;1CS3R;1ATTQ	-	100348779	-
ENSOCUG00000006627	313.4434816	405.756756	221.1302072	0.544982194	-0.875719	0.007377998	0.494035367	2	61904040	61924330	-	1275	CASP3	GO:0004197;GO:0004197;GO:0006508;GO:0006508;GO:0006508;GO:0008233;GO:0008234;GO:0008234;GO:0008234;GO:0016787;GO:0001782;GO:0004190;GO:0004197;GO:0004197;GO:0004861;GO:0005634;GO:0005634;GO:0005737;GO:0005829;GO:0006508;GO:0006508;GO:0006915;GO:0006915;GO:0006974;GO:0007507;GO:0007605;GO:0008233;GO:0008234;GO:0008234;GO:0008627;GO:0009411;GO:0009611;GO:0010033;GO:0016485;GO:0030216;GO:0030218;GO:…	K02187	EC:3.4.22.56	D	0DR4M;13KPR;1B4TH;0UNRN;0VE4P;0A3HR;1CYB8;KOG3573	caspase 3 [Source:HGNC Symbol;Acc:HGNC:1504]	100008840	Q8MJC3
ENSOCUG00000011429	16.38548732	26.39976986	6.371204787	0.241335619	-2.050887238	0.007752682	0.514631377	2	112765753	112765959	-	207	-	-	-	-	T	0AAMD;0DWCW;1D5N7;13YBC;1B6KK;0J38C;0UWFD;0VMSJ	-	-	-
ENSOCUG00000002956	18.95100167	7.840201644	30.06180169	3.834314863	1.938968812	0.00777373	0.514631377	GL018771	600519	1137678	+	2003	CPNE4	-	-	-	T	0V43Q;09T4Y;KOG1327;12Q7Z;0DEG5;1CP5U;0UFDY;1AZ82	copine 4 [Source:HGNC Symbol;Acc:HGNC:2317]	100353221	-
ENSOCUG00000014596	3550.016685	4677.796549	2422.23682	0.51781577	-0.949489193	0.007795244	0.514631377	GL018937	158194	353404	-	4969	LOXL2	GO:0005044;GO:0005507;GO:0016020;GO:0016641;GO:0055114;GO:0005044;GO:0005507;GO:0016020;GO:0016641;GO:0055114;GO:0000122;GO:0000785;GO:0001666;GO:0001837;GO:0001935;GO:0002040;GO:0004720;GO:0005044;GO:0005044;GO:0005507;GO:0005507;GO:0005507;GO:0005509;GO:0005615;GO:0005634;GO:0005654;GO:0005783;GO:0006464;GO:0006897;GO:0010718;GO:0016020;GO:0016020;GO:0016641;GO:0016641;GO:0018057;GO:0030199;GO:…	-	-	O;W;B	12NE8;0DF5G;0V4U9;09TV2;0IE2X;0UKIP;1AUU0;1CPV4	lysyl oxidase like 2 [Source:HGNC Symbol;Acc:HGNC:6666]	-	-
ENSOCUG00000013571	7.370837958	1.178826507	13.56284941	11.50538212	3.524236994	0.007810877	0.514631377	7	47981727	47983853	+	2127	LRRN3	GO:0005515;GO:0016020;GO:0016021;GO:0051965;	-	-	T	KOG0619;1AVDI;1CSHI;09WHS;0V7GC;13H9V;0DHT4;0UII7	leucine rich repeat neuronal 3 [Source:HGNC Symbol;Acc:HGNC:17200]	100347482	G1T5N6
ENSOCUG00000001751	604.4749167	784.7608248	424.1890087	0.540532854	-0.887545785	0.007836872	0.514631377	7	89289071	89306798	-	1218	RND3	GO:0000166;GO:0003924;GO:0003924;GO:0005525;GO:0005525;GO:0005525;GO:0007264;GO:0007264;	K07859	-	Z;S	0A27X;1B0WV;1CWQ4;0VB41;0DMUP;0UR1Q;KOG0393;138RW	Rho family GTPase 3 [Source:HGNC Symbol;Acc:HGNC:671]	100338644	G1SG20
ENSOCUG00000035541	22754.33952	16692.48453	28816.19451	1.726297511	0.787681121	0.007936331	0.519158152	GL018717	1789068	1793798	+	3495	-	-	-	-	-	-	-	-	-
ENSOCUG00000016211	40.51414347	22.74703792	58.28124902	2.562146738	1.357353104	0.008010523	0.520385413	3	136376912	136676563	-	1852	SNTB1	GO:0005198;GO:0005198;GO:0005515;GO:0032991;GO:0045202;GO:0005198;GO:0005515;GO:0005198;GO:0005515;	-	-	W	1CU29;0DJA7;KOG3551;0V8UW;09UHJ;1349P;1B0ED;0UMZD	syntrophin beta 1 [Source:HGNC Symbol;Acc:HGNC:11168]	100354514	G1TB55
ENSOCUG00000023599	26651.47204	17593.22972	35709.71437	2.029741835	1.021296241	0.008092163	0.520385413	14	91236699	91251380	-	959	APOD	GO:0000302;GO:0000302;GO:0005615;GO:0006006;GO:0006629;GO:0006869;GO:0006869;GO:0007568;GO:0007568;GO:0008289;GO:0008289;GO:0010642;GO:0015485;GO:0042308;GO:0048471;GO:0048662;GO:0051895;GO:0060588;GO:0060588;GO:0071638;GO:1900016;GO:2000098;GO:2000405;	-	-	M	1AT9Q;1CPBA;0DEME;0V495;0UFKS;KOG4824;09TA4;13SMT	Oryctolagus cuniculus apolipoprotein D (APOD), mRNA. [Source:RefSeq mRNA;Acc:NM_001082258]	-	-
ENSOCUG00000024529	222.6671683	57.43927991	387.8950567	6.753132303	2.755556822	0.008094836	0.520385413	3	100731676	100742765	+	1434	-	GO:0016020;GO:0016020;GO:0016020;GO:0016021;GO:0022857;GO:0022857;GO:0055085;GO:0055085;	K13870	-	E	0V9SU;09YUZ;0UK4I;13MF1;0DK9V;1CV3W;KOG1287	-	100348219	-
ENSOCUG00000032417	16107.27324	20469.13091	11745.41557	0.573811151	-0.80135209	0.008117982	0.520385413	7	173128405	173131737	+	1207	-	-	-	-	-	-	-	-	-
ENSOCUG00000022586	29.10470355	14.42876165	43.78064545	3.034262158	1.601345739	0.008158081	0.520385413	AAGW02082465	10581	11841	-	954	-	GO:0016020;GO:0016021;	-	-	T	KOG1630	-	-	-
ENSOCUG00000014709	885.078969	570.09743	1200.060508	2.105009503	1.073826746	0.008192903	0.520385413	GL018951	48852	51713	-	2288	SLC7A4	GO:0016020;GO:0022857;GO:0055085;GO:0016020;GO:0016020;GO:0016020;GO:0016021;GO:0022857;GO:0022857;GO:0055085;GO:0055085;	K13866	-	E	0APGY;1B1YI;0UIBV;12QK9;0W1QV;1CU08;0DJ8A;KOG1286	solute carrier family 7 member 4 [Source:HGNC Symbol;Acc:HGNC:11062]	100348453	G1T7Y4
ENSOCUG00000016278	260.1545647	160.7849681	359.5241613	2.236055806	1.160956194	0.008210828	0.520385413	GL018777	424250	429018	-	2845	FICD	GO:0005515;GO:0005524;GO:0016020;GO:0016021;GO:0018117;GO:0030176;GO:0030544;GO:0034976;GO:0042802;GO:0042803;GO:0051087;GO:0070733;GO:1903894;	-	-	S;T	0V4GW;09V4F;12TAU;1CR32;0DGDI;1B3TA;0UI4R;KOG3824	FIC domain containing [Source:HGNC Symbol;Acc:HGNC:18416]	100355245	G1TBA3
ENSOCUG00000008841	5864.302501	4280.452977	7448.152024	1.740038277	0.799119043	0.008220579	0.520385413	GL019499	22412	25787	-	1389	GLUL	GO:0003824;GO:0003824;GO:0004356;GO:0004356;GO:0004356;GO:0005739;GO:0005829;GO:0005886;GO:0006542;GO:0006542;GO:0006807;GO:0006807;GO:0008283;GO:0010594;GO:0018345;GO:0019706;GO:0042254;GO:0042802;GO:1903670;GO:1904749;	K01915	EC:6.3.1.2	E	0DN60;1AU8U;KOG0683;12PQ6;0VBF6;1CX2K;0UIRK;09UE5	glutamate-ammonia ligase [Source:HGNC Symbol;Acc:HGNC:4341]	100359274	-
ENSOCUG00000004013	427.5126621	595.4357596	259.5895646	0.435965695	-1.197713478	0.008230461	0.520385413	16	63027278	63067291	+	3993	LAMB3	GO:0005604;GO:0005610;GO:0035987;GO:0050873;	K06244	-	W	0V5V5;1B3GY;KOG0994;0DG4Y;12NZ6;0UTR9;1CQUJ;09UVH	laminin subunit beta 3 [Source:HGNC Symbol;Acc:HGNC:6490]	100342905	A0A0B5JSH0
ENSOCUG00000001539	288.2743895	141.9026874	434.6460915	3.062987032	1.614939259	0.008298342	0.522734057	18	26856489	26916862	-	1783	PHYHIPL	GO:0005515;GO:0005515;	-	-	S	0UKJZ;0V6MQ;12PDX;0IEM3;1AW2E;09VNV;0DGX7;1CRMG	phytanoyl-CoA 2-hydroxylase interacting protein like [Source:HGNC Symbol;Acc:HGNC:29378]	-	-
ENSOCUG00000011161	29.84945417	12.77536369	46.92354465	3.672971337	1.876947638	0.008339541	0.523390828	7	39352393	39396530	+	2798	LRRC17	GO:0005515;GO:0005615;GO:0045671;GO:0048539;GO:0005515;GO:0005515;GO:0005515;	-	-	T	KOG0619;13K81;0A1X6;1AU6J;0DPKG;0VCTY;0UHES;1CYJG	leucine rich repeat containing 17 [Source:HGNC Symbol;Acc:HGNC:16895]	100340395	-
ENSOCUG00000005098	809.5154188	583.30691	1035.723928	1.775607163	0.828312434	0.008499249	0.531243015	3	53230722	53348715	-	3006	STK10	GO:0004672;GO:0004672;GO:0004674;GO:0004674;GO:0004674;GO:0005524;GO:0005524;GO:0005886;GO:0006468;GO:0006468;GO:0042802;GO:0042803;GO:0046777;GO:0071593;GO:2000401;GO:2000401;	-	-	-	-	serine/threonine kinase 10 [Source:HGNC Symbol;Acc:HGNC:11388]	100358334	-
ENSOCUG00000001309	74.73310792	47.18001649	102.2861993	2.16799838	1.116363679	0.008544676	0.531243015	4	22901617	22980129	-	2591	ISM1	-	-	-	W	1CVEV;0VC5M;13IM0;0A2GG;0IE9A;0UJTW;1ARZ5;0DKKE	isthmin 1 [Source:HGNC Symbol;Acc:HGNC:16213]	100338889	G1SF62
ENSOCUG00000012634	53.34178847	99.89060164	6.792975305	0.068004148	-3.878233432	0.008559258	0.531243015	7	44146119	44205081	+	3675	SLC26A4	GO:0006885;GO:0008271;GO:0008272;GO:0015116;GO:0016020;GO:0016020;GO:0016021;GO:0016324;GO:0031526;GO:0032880;GO:0055085;GO:0070062;GO:0098656;GO:0008271;GO:0008271;GO:0008271;GO:0008272;GO:0008272;GO:0015116;GO:0015116;GO:0016020;GO:0016020;GO:0016020;GO:0016021;GO:0016021;GO:0016021;GO:0055085;GO:0055085;GO:0098656;GO:0098656;GO:1902358;GO:0008271;GO:0008272;GO:0015116;GO:0016020;GO:0016021;GO:…	K14702	-	P	0US10;1AX7G;1CQW5;0V5WY;09UX5;0DG6J;12Q5P;KOG0236	solute carrier family 26 member 4 [Source:HGNC Symbol;Acc:HGNC:8818]	100345415	G1T3S0
ENSOCUG00000015935	41.82557212	61.97643281	21.67471142	0.349725056	-1.515706934	0.008599326	0.531243015	3	16914482	16971140	+	960	TCF7	GO:0000122;GO:0000978;GO:0001227;GO:0003677;GO:0003677;GO:0003700;GO:0005634;GO:0005634;GO:0005634;GO:0005634;GO:0005634;GO:0005654;GO:0005719;GO:0006357;GO:0006357;GO:0006357;GO:0008013;GO:0008013;GO:0008013;GO:0016055;GO:0016055;GO:0016604;GO:0021915;GO:0030538;GO:0033153;GO:0033153;GO:0033153;GO:0042127;GO:0044212;GO:0044336;GO:0046632;GO:0048557;GO:0048619;GO:0060070;GO:0060070;GO:0060070;GO:…	-	-	K	KOG3248;0UMST;1CTVR;09WGI;1AYBQ;0DJ3V;13P5N;0V7F3	transcription factor 7 [Source:HGNC Symbol;Acc:HGNC:11639]	-	-
ENSOCUG00000004216	1009.129565	611.897811	1406.361318	2.29835978	1.200604652	0.008626276	0.531243015	9	13227126	13313585	+	2812	SLC6A20	GO:0005328;GO:0005887;GO:0006865;GO:0015171;GO:0015816;GO:0015824;GO:0016021;GO:0005328;GO:0005887;GO:0016021;GO:0005328;GO:0005887;GO:0016021;GO:0005328;GO:0005887;GO:0016021;GO:0005328;GO:0005328;GO:0005887;GO:0005887;GO:0006836;GO:0015293;GO:0016020;GO:0016021;GO:0016021;GO:0016021;GO:0055085;GO:0005328;GO:0016021;GO:0005328;GO:0005887;GO:0016021;	K05048	-	P	KOG3659;12NMW;1B3JX;09TC8;0V4BE;0DJG7;1CVDH;0UIYZ	solute carrier family 6 member 20 [Source:HGNC Symbol;Acc:HGNC:30927]	100346971	G1SLB4
ENSOCUG00000013534	251.6183855	175.5336447	327.7031263	1.866896382	0.900641856	0.008652065	0.531243015	3	135390032	135506643	-	2841	ENPP2	GO:0003676;GO:0003824;GO:0004528;GO:0004551;GO:0004622;GO:0005044;GO:0006935;GO:0006955;GO:0016787;GO:0030247;GO:0030334;GO:0045765;GO:0046872;GO:0003676;GO:0003824;GO:0004528;GO:0004551;GO:0004622;GO:0005044;GO:0006935;GO:0006955;GO:0016787;GO:0030247;GO:0030334;GO:0045765;GO:0046872;GO:0003676;GO:0003824;GO:0004528;GO:0004551;GO:0004622;GO:0005044;GO:0006935;GO:0006955;GO:0016787;GO:0030247;GO:…	K01122	EC:3.1.4.39	-	-	ectonucleotide pyrophosphatase/phosphodiesterase 2 [Source:HGNC Symbol;Acc:HGNC:3357]	100348637	-
ENSOCUG00000007427	18.28418792	7.443765996	29.12460984	3.9126176	1.968134115	0.008829809	0.540206446	1	124022789	124557115	-	13793	FAT3	GO:0005509;GO:0005509;GO:0005886;GO:0005886;GO:0007155;GO:0007155;GO:0007156;GO:0007156;GO:0016020;GO:0016020;GO:0016020;GO:0016021;GO:0005509;GO:0005886;GO:0007155;GO:0007156;GO:0016020;	K16506	-	T	0DIWG;1CTMS;1AS8U;KOG1219;09UGS;12N7V;0V5G3;0UG8M	FAT atypical cadherin 3 [Source:HGNC Symbol;Acc:HGNC:23112]	100338459	-
ENSOCUG00000005513	949.2252935	694.1098038	1204.340783	1.735086836	0.795007867	0.009022902	0.55004129	12	25474864	25754366	-	1910	FKBP5	GO:0000413;GO:0003755;GO:0005515;GO:0005528;GO:0031072;GO:0000413;GO:0003755;GO:0003755;GO:0005515;GO:0005528;GO:0005654;GO:0031072;GO:0031072;GO:0061077;GO:0000413;GO:0000413;GO:0003755;GO:0003755;GO:0003755;GO:0005515;GO:0005528;GO:0005528;GO:0016853;GO:0031072;GO:0031072;GO:0000413;GO:0003755;GO:0005528;GO:0031072;	K09571	EC:5.2.1.8	O	1CRAG;0UQGR;KOG0543;12NPG;09VC6;1AS3G;0V4K1;0DGKM	FKBP prolyl isomerase 5 [Source:HGNC Symbol;Acc:HGNC:3721]	100339155	G1SP30
ENSOCUG00000001018	10.09594801	2.864016671	17.32787935	6.050201984	2.596983307	0.00908724	0.551984893	10	44703227	44737945	-	3326	-	GO:0000166;GO:0001678;GO:0001678;GO:0004340;GO:0004340;GO:0004396;GO:0004396;GO:0004396;GO:0005524;GO:0005524;GO:0005524;GO:0005536;GO:0005536;GO:0005623;GO:0005975;GO:0005975;GO:0006096;GO:0006096;GO:0006096;GO:0016301;GO:0016310;GO:0016740;GO:0016773;GO:0016773;GO:0032024;GO:0032024;GO:0046835;GO:0051156;GO:0001678;GO:0004340;GO:0004396;GO:0005524;GO:0005536;GO:0005975;GO:0006096;GO:0016773;GO:…	-	-	G	09TDH;0UQR3;1B0HT;12P4I;KOG1369;0V4CM;0DEQR;1CPEF	-	-	-
ENSOCUG00000007551	2568.55253	1435.416876	3701.688185	2.578824484	1.366713586	0.009172044	0.555153481	GL018758	1727689	1734915	-	2309	TRPV6	GO:0005216;GO:0005216;GO:0005262;GO:0005262;GO:0005515;GO:0006811;GO:0006811;GO:0006811;GO:0006816;GO:0006816;GO:0016020;GO:0016020;GO:0016020;GO:0016021;GO:0016021;GO:0016021;GO:0034220;GO:0055085;GO:0055085;GO:0070588;	K04975	-	P	0V6UQ;0UJ5V;09VW3;KOG3676;12PT9;0DH48;1AVXP;1CRUG	Oryctolagus cuniculus transient receptor potential cation channel subfamily V member 6 (TRPV6), mRNA. [Source:RefSeq mRNA;Acc:NM_001082776]	100009565	Q4U456
ENSOCUG00000011925	553.9772242	402.9598123	704.9946361	1.749540809	0.806976317	0.009283122	0.557981532	14	18875812	19176020	-	2802	OSBPL10	GO:0001786;GO:0006869;GO:0015485;	K20465	-	T	KOG2210;12TU3;0DIUN;0V8FA;09XH7;1B3ZG;0UQJE;1CPZR	oxysterol binding protein like 10 [Source:HGNC Symbol;Acc:HGNC:16395]	100345516	G1T287
ENSOCUG00000010041	1670.691441	1141.617893	2199.764989	1.92688377	0.946269551	0.009289663	0.557981532	13	37454956	37461098	+	2582	FAM189B	GO:0016020;GO:0016021;GO:0016021;GO:0016021;GO:0050699;GO:0016021;GO:0016021;GO:0016021;	-	-	S	0V70E;0UJEQ;0DHB9;1CS1D;1B276;09W29;13N77;0IET7	family with sequence similarity 189 member B [Source:HGNC Symbol;Acc:HGNC:1233]	100356722	-
ENSOCUG00000024446	321.0698138	164.9853471	477.1542805	2.892100958	1.532117915	0.009331689	0.557981532	GL019040	19219	19678	-	330	ID2	GO:0005634;GO:0005634;GO:0005634;GO:0005737;GO:0005737;GO:0005737;GO:0005829;GO:0043433;GO:0044325;GO:0045892;GO:0045892;GO:0045892;GO:0046983;GO:0046983;GO:2000045;	-	-	K	0DTR5;0VHJJ;0IVXR;1B5HA;0A6RM;13PVY;0UV34;1D330	inhibitor of DNA binding 2 [Source:HGNC Symbol;Acc:HGNC:5361]	-	-
ENSOCUG00000010454	124.0932988	83.17698955	165.009608	1.983837224	0.988293656	0.009349996	0.557981532	18	39951111	40167723	-	3143	CPEB3	GO:0000122;GO:0003676;GO:0003676;GO:0003723;GO:0003723;GO:0003730;GO:0003730;GO:0003730;GO:0005634;GO:0005737;GO:0006412;GO:0006417;GO:0006417;GO:0008135;GO:0017148;GO:0030014;GO:0043005;GO:0045182;GO:0045182;GO:0060213;GO:0061158;GO:0071230;GO:1900153;GO:0003676;GO:0003730;GO:0006417;GO:0045182;GO:0003676;GO:0003730;GO:0006417;GO:0045182;GO:0003676;GO:0003730;GO:0006417;GO:0045182;GO:0003676;GO:…	K02602	-	J	1432H;0B19F;0E6IU;1DDHA;0WDUK;0V1SV;KOG0129	cytoplasmic polyadenylation element binding protein 3 [Source:HGNC Symbol;Acc:HGNC:21746]	100341373	-
ENSOCUG00000015329	117526.1636	227915.2546	7137.072537	0.031314589	-4.997021244	0.009416949	0.560012145	1	114001318	114012696	+	822	MMP7	GO:0004175;GO:0004222;GO:0004222;GO:0006508;GO:0006508;GO:0006508;GO:0006508;GO:0008233;GO:0008237;GO:0008237;GO:0008237;GO:0008237;GO:0008270;GO:0008270;GO:0016787;GO:0031012;GO:0031012;GO:0046872;	K01397	EC:3.4.24.23	O;W	0DNWG;KOG1565;0VC4F;1AVVQ;0UKD6;13KIY;0A18N;1CXTX	matrix metallopeptidase 7 [Source:HGNC Symbol;Acc:HGNC:7174]	100357971	G1T972
ENSOCUG00000012232	748.8369265	963.9610854	533.7127675	0.5536663	-0.852911383	0.009498246	0.562749627	13	35166758	35265491	-	4648	KIRREL1	GO:0016020;GO:0016021;GO:0001933;GO:0005886;GO:0005886;GO:0005911;GO:0005911;GO:0007588;GO:0017022;GO:0030838;GO:0043198;GO:0048471;GO:0098609;	-	-	T	0DEUY;12RIJ;1AVUF;1CPIP;KOG3510;0UP95;0V4H5;09TI8	kirre like nephrin family adhesion molecule 1 [Source:HGNC Symbol;Acc:HGNC:15734]	100356636	G1T2W4
ENSOCUG00000004655	79.89630388	48.10028805	111.6923197	2.322071743	1.215412547	0.009529156	0.562749627	GL018789	847456	874155	+	4452	-	GO:0004497;GO:0005506;GO:0016705;GO:0016712;GO:0020037;GO:0055114;GO:0004497;GO:0004497;GO:0004497;GO:0005506;GO:0005506;GO:0016491;GO:0016705;GO:0016705;GO:0016712;GO:0016712;GO:0020037;GO:0020037;GO:0046872;GO:0055114;GO:0055114;GO:0055114;GO:0004497;GO:0005506;GO:0016705;GO:0016712;GO:0020037;GO:0055114;	K07412	EC:1.14.14.1	Q	1ARR1;12SZU;0DGDQ;KOG0156;1CR8N;09TUB;0V59K;0UICT	-	100327257	Q29532
ENSOCUG00000014750	546.8486887	397.8126216	695.8847558	1.74927772	0.806759354	0.00957119	0.563276145	GL018732	554696	639748	-	2798	TENT4B	GO:0003723;GO:0004652;GO:0004652;GO:0005730;GO:0005737;GO:0006378;GO:0010587;GO:0016779;GO:0031499;GO:0032211;GO:0033500;GO:0043629;GO:0043630;GO:0043631;GO:0060212;GO:0070568;GO:0071044;GO:0071050;GO:0071076;GO:1905870;GO:0003723;GO:0003723;GO:0004652;GO:0004652;GO:0016779;GO:0016779;GO:0043631;GO:0043631;GO:0003723;GO:0004652;GO:0043631;	K03514	EC:2.7.7.19	L	1ASKK;12R8T;0DI9V;1CXVW;0UMZQ;09WZB;KOG1906;0V7XC	terminal nucleotidyltransferase 4B [Source:HGNC Symbol;Acc:HGNC:30758]	100357616	-
ENSOCUG00000010483	201.2586187	263.7472296	138.7700078	0.526147736	-0.926460146	0.009710918	0.569528598	19	4058393	4087063	-	1907	CENPV	GO:0000776;GO:0001667;GO:0005634;GO:0005654;GO:0005829;GO:0015630;GO:0016846;GO:0016846;GO:0030496;GO:0031508;GO:0032467;GO:0033044;GO:0034508;GO:0051233;	-	-	S;U	0V6M6;1CRKV;09VN3;0DGWM;13MEC;KOG4192;0UIUT;1ARP5	centromere protein V [Source:HGNC Symbol;Acc:HGNC:29920]	-	-
ENSOCUG00000001375	962.4667656	1231.660226	693.2733056	0.562877075	-0.829108203	0.009779842	0.571599848	18	48289141	48299138	+	1397	-	GO:0006633;GO:0016020;GO:0016021;GO:0016491;GO:0016717;GO:0016717;GO:0055114;GO:0055114;GO:0055114;	K00507	EC:1.14.19.1	I	0V4IC;KOG1600;1CRV7;1AV9J;09VWV;0DH4Z;0UJ6M;12QBP	-	100346046	G1SFA6
ENSOCUG00000002020	104.9830213	43.67457142	166.2914712	3.807512377	1.928848726	0.009882087	0.575597699	GL018798	518375	525543	+	1992	LGI3	GO:0005515;GO:0008021;GO:0017157;GO:0005515;	K19999	-	S;W	0DQ8S;1AXWY;0VDH6;13MYZ;0IJD3;1CZAI;0UNDH;0A2M5	leucine rich repeat LGI family member 3 [Source:HGNC Symbol;Acc:HGNC:18711]	100354485	-
ENSOCUG00000010136	356.621048	222.6993847	490.5427113	2.202712468	1.139281185	0.009965682	0.578485731	GL018703	336446	376075	-	1402	LMCD1	GO:0000122;GO:0003714;GO:0005634;GO:0008270;GO:0008270;GO:0010611;GO:0010611;GO:0046872;GO:0070886;GO:0070886;	-	-	Z;T;K	1CRMV;0UIW8;09U4Z;1ATVU;0V6N4;0DGXK;140QU;0INGI	LIM and cysteine rich domains 1 [Source:HGNC Symbol;Acc:HGNC:6633]	100345793	G1SYM7
ENSOCUG00000013703	222.2596591	155.8976599	288.6216584	1.851353373	0.888580293	0.010026498	0.580036326	12	7074182	7184917	-	1502	GFOD1	GO:0016491;GO:0016491;GO:0055114;	-	-	A;S;E	1CRZN;0V6YY;09W0J;1ASTI;0DH9P;12PH5;KOG2742;0UPPV	glucose-fructose oxidoreductase domain containing 1 [Source:HGNC Symbol;Acc:HGNC:21096]	100338061	G1T5Y5
ENSOCUG00000004668	342.4659348	240.7289733	444.2028963	1.845240688	0.883809009	0.010181229	0.586990985	2	111872075	111897522	-	3710	SEMA4F	GO:0005515;GO:0005783;GO:0005886;GO:0007411;GO:0007411;GO:0016020;GO:0016021;GO:0016021;GO:0016021;GO:0030215;GO:0030215;GO:0005515;GO:0007411;GO:0016021;GO:0030215;GO:0005515;GO:0007411;GO:0016021;GO:0030215;	K06521	-	T	0UIHE;1CR2S;13JFE;09UAH;1AU1I;0DR3H;KOG3611;0V6D7	ssemaphorin 4F [Source:HGNC Symbol;Acc:HGNC:10734]	100347884	-
ENSOCUG00000015811	133.6631206	71.7712616	195.5549796	2.724697535	1.446096087	0.010289	0.589837145	1	55127706	55325337	+	1846	PIP5K1B	GO:0000166;GO:0005524;GO:0016301;GO:0016307;GO:0016307;GO:0016307;GO:0016310;GO:0016740;GO:0046488;GO:0046488;GO:0046488;GO:0046854;GO:0001931;GO:0005829;GO:0006661;GO:0016307;GO:0016308;GO:0046488;GO:0046488;GO:0016307;GO:0046488;GO:0016307;GO:0046488;GO:0016307;GO:0046488;GO:0016307;GO:0046488;	K00889	EC:2.7.1.68	T	0V9HI;KOG0229;0UH6U;0DKA9;09YV8;12S8A;1CWPA;1B08I	phosphatidylinositol-4-phosphate 5-kinase type 1 beta [Source:HGNC Symbol;Acc:HGNC:8995]	100356255	G1U0N3
ENSOCUG00000014241	67.95052618	94.27058118	41.63047119	0.441606179	-1.179167735	0.010308967	0.589837145	13	69303416	69320058	-	1676	RWDD3	GO:0005515;GO:0032088;GO:0032088;GO:0032088;GO:0033235;GO:0033235;GO:0033235;GO:1902073;GO:1902073;GO:1902073;	-	-	S	0V48F;09T9E;0IGD3;1AW6R;13MM5;0UFJM;0DEKK;1CPAH	RWD domain containing 3 [Source:HGNC Symbol;Acc:HGNC:21393]	100349931	-
ENSOCUG00000002924	23162.58091	16601.80089	29723.36093	1.790369678	0.840257508	0.010334635	0.589837145	17	73821777	73827521	+	1064	LGALS3	GO:0002376;GO:0005576;GO:0005634;GO:0005681;GO:0005737;GO:0006397;GO:0008380;GO:0019863;GO:0030154;GO:0030246;GO:0030246;GO:0030246;GO:0045087;GO:0001772;GO:0002548;GO:0005634;GO:0005737;GO:0005743;GO:0019863;GO:0019903;GO:0030246;GO:0030593;GO:0030855;GO:0031334;GO:0042056;GO:0042129;GO:0043236;GO:0045806;GO:0048245;GO:0048246;GO:0050918;GO:0070232;GO:0071674;GO:0071677;GO:0090280;GO:1902041;GO:…	K06831	-	W	1D159;0A4D8;0UGPC;0VF81;1ASDY;13MYU;KOG3587;0DF7M	Galectin-3 [Source:UniProtKB/Swiss- Prot;Acc:P47845]	100009187	P47845
ENSOCUG00000032791	488.0702146	824.7420291	151.3984002	0.183570613	-2.445592969	0.010427314	0.593136331	AAGW02081404	8154	8417	-	264	-	GO:0015078;GO:0015986;GO:0045263;	-	-	-	-	-	-	-
ENSOCUG00000009203	617.1141972	152.7603687	1081.468026	7.079506518	2.8236488	0.010551329	0.598190018	4	50495644	50632880	+	3286	LGR5	GO:0001942;GO:0004888;GO:0005515;GO:0005887;GO:0007186;GO:0009994;GO:0016021;GO:0016500;GO:0032588;GO:0042127;GO:0048839;GO:0090263;GO:2001013;GO:0005515;GO:0007186;GO:0007186;GO:0016020;GO:0016021;GO:0016021;GO:0016021;GO:0016500;GO:0016500;GO:0005515;GO:0007186;GO:0016021;GO:0016500;GO:0005515;GO:0007186;GO:0016021;GO:0016500;GO:0005515;GO:0007186;GO:0016021;GO:0016500;GO:0005515;GO:0007186;GO:…	K04308	-	T	KOG0619;1DD5F;0V1II;0WDAD;KOG2087;0E666;0B0T0;1BAA1;14U06	leucine rich repeat containing G protein-coupled receptor 5 [Source:HGNC Symbol;Acc:HGNC:4504]	100343386	G1SWS3
ENSOCUG00000039180	31.34409525	46.84840043	15.83979008	0.338107383	-1.564446574	0.010601031	0.59870991	GL018841	756881	763221	-	714	-	-	-	-	-	-	-	-	-
ENSOCUG00000004762	461.4534689	335.1082473	587.7986905	1.754056175	0.810694952	0.010630903	0.59870991	12	148161986	148251056	+	4835	SYNJ2	GO:0003676;GO:0034595;GO:0042578;GO:0046856;GO:0003676;GO:0003676;GO:0003723;GO:0016787;GO:0034595;GO:0034595;GO:0042578;GO:0042578;GO:0046856;GO:0046856;GO:0003676;GO:0034595;GO:0042578;GO:0046856;GO:0003676;GO:0034595;GO:0042578;GO:0046856;	K20279	EC:3.1.3.36	I	12RV2;1CQD8;0UH3C;0V5DA;09UDT;KOG0566;1ASS7;0DFPN	synaptojanin 2 [Source:HGNC Symbol;Acc:HGNC:11504]	100355301	-
ENSOCUG00000003208	3839.557847	2841.18544	4837.930254	1.702785811	0.767896974	0.010705351	0.6003707	1	54161726	54419044	-	7094	DOCK8	GO:0005085;GO:0007264;GO:0005085;GO:0007264;GO:0005085;GO:0007264;GO:0005085;GO:0007264;GO:0005085;GO:0007264;GO:0001771;GO:0005085;GO:0005085;GO:0005085;GO:0005085;GO:0005737;GO:0007264;GO:0007264;GO:0031252;GO:0031256;GO:0036336;GO:0043547;GO:0061485;GO:0070233;GO:1903905;GO:1903905;GO:1990869;GO:2000406;GO:2000406;	K21852	-	-	-	dedicator of cytokinesis 8 [Source:HGNC Symbol;Acc:HGNC:19191]	100354750	G1SJ96
ENSOCUG00000009729	167.4265745	219.0653293	115.7878197	0.528553834	-0.919877675	0.010730991	0.6003707	19	29851239	29914840	+	3076	-	GO:0016020;GO:0016021;GO:0030178;GO:0072089;	K15694	EC:2.3.2.27	-	-	-	100354815	G1SXT2
ENSOCUG00000027198	362.8094549	180.7560958	544.862814	3.014353744	1.591848732	0.010776756	0.600441365	8	318105	337792	+	3043	SLC38A4	GO:0016020;GO:0016021;	K14991	-	P;E	1AVDW;KOG1305;1CV3D;0V7U9;12S53;09VXT;0DK9G;0UJX1	solute carrier family 38 member 4 [Source:HGNC Symbol;Acc:HGNC:14679]	100338563	-
ENSOCUG00000007439	81.05218208	110.0110657	52.09329845	0.473527805	-1.078478954	0.010802861	0.600441365	GL018705	1472278	1493068	+	2543	NUDT15	GO:0000278;GO:0000302;GO:0006195;GO:0006203;GO:0008413;GO:0008413;GO:0009217;GO:0016787;GO:0016787;GO:0035539;GO:0042262;GO:0042738;GO:0047429;GO:0061136;GO:1901292;GO:0016787;	K03574	EC:3.6.1.55	L	0VE92;13U2Q;0J0G8;0DR1Q;1D05Z;0UTDM;0A3EB;1B55Y	nudix hydrolase 15 [Source:HGNC Symbol;Acc:HGNC:23063]	100356660	-
ENSOCUG00000003057	222.9080778	157.0412761	288.7748796	1.838847001	0.878801447	0.011014181	0.610192827	GL018911	366513	422098	+	3948	KIAA0513	-	-	-	S	1AWMT;0VCM8;0UIHK;0IDYE;13IIA;1CUU5;0A1RM;0DK05	KIAA0513 [Source:HGNC Symbol;Acc:HGNC:29058]	100338870	-
ENSOCUG00000033876	252.087008	170.9586066	333.2154093	1.949099936	0.962808064	0.011249691	0.619281647	GL019049	112032	133343	-	1617	-	GO:0004055;GO:0005524;GO:0006526;	-	-	-	-	-	-	-
ENSOCUG00000017924	10867.62834	13723.58649	8011.670196	0.58378837	-0.776482623	0.011286568	0.619281647	14	49297255	49394081	+	2821	MME	GO:0001786;GO:0001822;GO:0004175;GO:0004222;GO:0004222;GO:0005737;GO:0005769;GO:0005802;GO:0005886;GO:0005903;GO:0006508;GO:0006508;GO:0007568;GO:0007611;GO:0008021;GO:0008233;GO:0008237;GO:0008238;GO:0008270;GO:0016020;GO:0019233;GO:0030424;GO:0030424;GO:0030425;GO:0031410;GO:0042803;GO:0043025;GO:0044306;GO:0045121;GO:0045202;GO:0046449;GO:0050435;GO:0050769;GO:0061837;GO:0071345;GO:0071492;GO:…	K01389	EC:3.4.24.11	-	-	membrane metalloendopeptidase [Source:HGNC Symbol;Acc:HGNC:7154]	100009251	P08049
ENSOCUG00000023058	3475.74846	2273.198973	4678.297946	2.058023957	1.041259777	0.011305827	0.619281647	13	33000298	33007056	+	2464	IGSF8	GO:0016020;GO:0016021;GO:0016021;GO:0043231;GO:0016020;GO:0016021;	K06730	-	T	1CPRF;0UG65;12S7E;0V4QM;09TRA;0DF1N;0IHZZ;1AXEV	immunoglobulin superfamily member 8 [Source:HGNC Symbol;Acc:HGNC:17813]	100338663	-
ENSOCUG00000014504	396.3441703	505.2860544	287.4022862	0.568791249	-0.814028825	0.011323882	0.619281647	19	25471055	25524142	-	1332	TADA2A	GO:0000278;GO:0001932;GO:0003677;GO:0003677;GO:0003713;GO:0003713;GO:0005515;GO:0005634;GO:0005634;GO:0005671;GO:0006357;GO:0006357;GO:0031063;GO:0031647;GO:0035065;GO:0035065;GO:0072686;GO:0090043;GO:1903508;	K11314	-	B	0VA9U;1CVQ0;0DKV0;0UPA8;09ZCQ;1B1R8;12XSZ;KOG0457	transcriptional adaptor 2A [Source:HGNC Symbol;Acc:HGNC:11531]	100349529	G1T7J7
ENSOCUG00000010021	215.7312298	320.7878856	110.674574	0.345008583	-1.53529584	0.011399835	0.621437161	GL018721	3351965	3364626	-	2328	CMPK2	GO:0004127;GO:0004550;GO:0004798;GO:0004798;GO:0005524;GO:0005524;GO:0005739;GO:0006165;GO:0006233;GO:0006233;GO:0009142;GO:0033862;GO:0046940;GO:0050145;GO:0050145;GO:0071222;	K13809	EC:2.7.4.14	F	1AXFD;0V8UG;0UMYT;09XWZ;13JW8;KOG3327;0DJ9U;1CU1T	cytidine/uridine monophosphate kinase 2 [Source:HGNC Symbol;Acc:HGNC:27015]	100348784	-
ENSOCUG00000014344	409.5259786	295.556769	523.4951881	1.771217048	0.824741014	0.011499529	0.624139108	16	7133115	7408795	-	4234	MPP7	GO:0005515;GO:0005515;GO:0005515;GO:0005654;GO:0005912;GO:0005923;GO:0019904;GO:0030054;GO:0031334;GO:0060090;GO:0070830;GO:0071896;GO:0097025;GO:0005515;GO:0005515;	-	-	T	1B0W3;0V5M2;KOG0609;1CRWZ;12P0Y;0UNB1;09UMH;0DFXA	membrane palmitoylated protein 7 [Source:HGNC Symbol;Acc:HGNC:26542]	100357851	-
ENSOCUG00000007401	665.4883558	849.0227069	481.9540046	0.567657379	-0.81690767	0.011547386	0.624139108	4	33134514	33146488	+	2798	CACNB3	GO:0005245;GO:0005515;GO:0005891;GO:0070588;GO:0005245;GO:0005245;GO:0005245;GO:0005515;GO:0005891;GO:0005891;GO:0005891;GO:0005891;GO:0006816;GO:0016020;GO:0050852;GO:0070588;GO:0070588;GO:0005245;GO:0005515;GO:0005891;GO:0070588;GO:0005245;GO:0005515;GO:0005891;GO:0070588;GO:0005245;GO:0005515;GO:0005891;GO:0070588;GO:0005245;GO:0005515;GO:0005891;GO:0070588;GO:0005245;GO:0005515;GO:0005891;GO:…	K04864	-	T;P	1CSXY;09UPJ;1AXSB;KOG3812;0V5P5;12NVH;0UHA2;0DI7I	calcium voltage-gated channel auxiliary subunit beta 3 [Source:HGNC Symbol;Acc:HGNC:1403]	100009402	P54286
ENSOCUG00000014142	26.00999797	0	52.01999593	Inf	Inf	0.011559491	0.624139108	1	54808834	54813901	-	1298	-	GO:0016020;GO:0016021;	-	-	S	0A71H;1B5B8;0UV15;13U5C;0IZEX;1D3B1;0VHQK;0DSFX	-	-	-
ENSOCUG00000003822	209.5336414	146.7858396	272.2814432	1.854957154	0.891385863	0.011702398	0.627244376	12	44840726	44932145	+	3665	FAM83B	GO:0005154;GO:0005737;GO:0007173;GO:0008283;GO:0016020;GO:0019901;GO:0036312;GO:0036313;	K23930	-	O	1B5B6;0IK0Q;0UQWV;0DMPM;1CWJ9;0VB08;12U2V;0A041	family with sequence similarity 83 member B [Source:HGNC Symbol;Acc:HGNC:21357]	100343658	-
ENSOCUG00000007249	17.11406275	6.033185142	28.19494036	4.673309321	2.224444531	0.011730835	0.627244376	2	149510143	149610910	-	2225	VIT	GO:0005539;GO:0005614;GO:0010811;GO:0021510;GO:0030198;GO:0031012;	-	-	W;V	13DYE;1BB5R;0E8N9;0WHKZ;0IR88;0V3CE;0B518;1DFJV	vitrin [Source:HGNC Symbol;Acc:HGNC:12697]	100339458	-
ENSOCUG00000021400	27.99646015	52.94034656	3.052573734	0.05766063	-4.11626959	0.011760973	0.627244376	X	71806355	71808247	+	1860	-	-	-	-	-	-	-	-	-
ENSOCUG00000011348	2988.627736	2201.189021	3776.066451	1.715466693	0.778601115	0.01176452	0.627244376	7	160731113	160734921	-	2108	CHPF	GO:0005794;GO:0008376;GO:0008376;GO:0016740;GO:0016757;GO:0030206;GO:0032580;GO:0032580;GO:0032580;	-	-	S;U	KOG3708;12QI2;0DNP4;0VBXY;09WXU;1AXS6;1D0YM;0UN90	Oryctolagus cuniculus chondroitin polymerizing factor (CHPF), mRNA. [Source:RefSeq mRNA;Acc:NM_001171483]	-	-
ENSOCUG00000023797	74.64990844	40.45772455	108.8420923	2.690267274	1.427749509	0.011861678	0.630448194	13	126975130	127003260	-	2298	-	GO:0005576;GO:0007165;GO:0008083;GO:0008083;GO:0008083;	-	-	T	0UMF1;KOG3900;0DET9;0V4FE;09TGD;1AV69;1CPH2;12RHZ	-	-	-
ENSOCUG00000012307	1290.311051	1925.105009	655.5170924	0.340509785	-1.554231839	0.011926216	0.630891475	GL018716	213015	236906	+	1474	PRXL2A	GO:0005737;GO:0016020;GO:0016021;GO:0016209;GO:0045670;GO:0055114;GO:0055114;GO:0055114;GO:0098869;	-	-	O;T	09U3S;0V52W;1ASES;KOG4498;0UGP9;0DFDG;1CQ38;13KNU	peroxiredoxin like 2A [Source:HGNC Symbol;Acc:HGNC:28651]	100355235	G1T310
ENSOCUG00000012379	1173.355427	864.8295719	1481.881282	1.713495156	0.776942113	0.012035963	0.630891475	12	5760688	5902314	+	8812	HIVEP1	GO:0003676;GO:0003676;GO:0003676;GO:0003676;GO:0000122;GO:0000122;GO:0000978;GO:0001227;GO:0003676;GO:0003676;GO:0005634;GO:0005654;GO:0005739;GO:0016604;GO:0030509;GO:0045944;	-	-	K	0VAS5;0DME5;13IMQ;0UH3W;KOG1721;09ZVR;1ARNR;1CW9C	HIVEP zinc finger 1 [Source:HGNC Symbol;Acc:HGNC:4920]	-	-
ENSOCUG00000012233	100.8573251	52.0842219	149.6304283	2.87285521	1.522485284	0.012052882	0.630891475	GL018810	691973	711424	+	2999	GGT5	GO:0006508;GO:0006751;GO:0006751;GO:0036374;GO:0036374;GO:0000048;GO:0002951;GO:0005886;GO:0006508;GO:0006520;GO:0006631;GO:0006751;GO:0006751;GO:0006954;GO:0031226;GO:0036374;GO:0036374;GO:1901750;GO:1901750;GO:0006751;GO:0036374;	K18592	-	E	KOG2410;1AVIU;0DHIR;09W9G;0UQTX;1CS8Y;13J8Z;0V5K2	gamma-glutamyltransferase 5 [Source:HGNC Symbol;Acc:HGNC:4260]	100358051	-
ENSOCUG00000001836	105.5914585	70.43109408	140.751823	1.998433005	0.998869209	0.012064882	0.630891475	GL019579	123	12666	+	5605	ADGRL1	GO:0004888;GO:0004888;GO:0004930;GO:0004930;GO:0004930;GO:0007165;GO:0007166;GO:0007166;GO:0007186;GO:0007186;GO:0007186;GO:0016020;GO:0016020;GO:0016020;GO:0016021;GO:0016021;GO:0016021;GO:0004888;GO:0004930;GO:0007166;GO:0007186;GO:0016020;GO:0016021;	-	-	T;W	0UK79;1CSMA;1AXM1;12QTI;KOG3545;09WM3;KOG4193;0DHWQ;0V66H	adhesion G protein-coupled receptor L1 [Source:HGNC Symbol;Acc:HGNC:20973]	-	-
ENSOCUG00000009473	166.7230553	217.5304101	115.9157006	0.532871246	-0.908141109	0.012084339	0.630891475	1	122739267	122790959	-	2041	PANX1	GO:0006812;GO:0015267;GO:0050716;GO:0002931;GO:0003779;GO:0005102;GO:0005262;GO:0005783;GO:0005886;GO:0005886;GO:0005886;GO:0005921;GO:0006811;GO:0006812;GO:0006812;GO:0006812;GO:0006816;GO:0015267;GO:0015267;GO:0015267;GO:0016020;GO:0016021;GO:0022840;GO:0030054;GO:0032059;GO:0033198;GO:0034214;GO:0050715;GO:0050716;GO:0050716;GO:0050717;GO:0050718;GO:0050718;GO:0051015;GO:0055077;GO:0055085;GO:…	K03443	-	-	-	pannexin 1 [Source:HGNC Symbol;Acc:HGNC:8599]	100358139	G1U205
ENSOCUG00000003434	1438.550676	1806.629913	1070.47144	0.592523921	-0.755054696	0.01209855	0.630891475	14	96230616	96336048	-	3404	SLC49A4	GO:0043231;GO:0016020;GO:0016021;	-	-	P;B;U	1AXN7;KOG2563;09Z9W;0DKS4;0VA71;0UT8C;13IKB;1CTYK	solute carrier family 49 member 4 [Source:HGNC Symbol;Acc:HGNC:16628]	-	-
ENSOCUG00000005043	73.2113524	44.25283683	102.169868	2.308775556	1.207127931	0.012129675	0.630891475	14	80045788	80094927	+	2039	LIPH	GO:0005576;GO:0006629;GO:0006629;GO:0046872;GO:0052689;GO:0052689;GO:0006629;GO:0052689;GO:0004620;GO:0005615;GO:0005886;GO:0006629;GO:0008201;GO:0016042;GO:0052689;	K19404	EC:3.1.1.-	-	-	Oryctolagus cuniculus lipase H (LIPH), mRNA. [Source:RefSeq mRNA;Acc:NM_001082106]	100008812	Q9BDJ4
ENSOCUG00000009843	176.0303466	104.8061936	247.2544996	2.359159236	1.238272799	0.012249234	0.631027824	3	19338232	19824470	-	2037	SPOCK1	GO:0005509;GO:0005515;GO:0004869;GO:0005509;GO:0005509;GO:0005515;GO:0005615;GO:0008191;GO:0010812;GO:0010951;GO:0010977;GO:0001764;GO:0004869;GO:0005509;GO:0005509;GO:0005509;GO:0005515;GO:0005615;GO:0005737;GO:0008191;GO:0010812;GO:0010951;GO:0010977;GO:0016528;GO:0021953;GO:0022008;GO:0031594;GO:0033268;	K08136	-	O;W;L	0DHAN;13JTW;1B3P9;0V6ZV;KOG3555;09W1K;1CS0Q;0US43	SPARC (osteonectin), cwcv and kazal like domains proteoglycan 1 [Source:HGNC Symbol;Acc:HGNC:11251]	100342871	-
ENSOCUG00000003140	53.91300259	32.59148006	75.23452511	2.308410816	1.206899996	0.012260983	0.631027824	10	10958013	10986353	+	2004	NFE2L3	GO:0000122;GO:0000978;GO:0001227;GO:0003677;GO:0003677;GO:0003677;GO:0003700;GO:0003700;GO:0005634;GO:0005634;GO:0005634;GO:0006355;GO:0006355;GO:0006357;GO:0006357;	-	-	K	12QXZ;1CZZP;0UIMK;1AU50;KOG3863;0DQVP;0VE2W;0A1Z7	nuclear factor, erythroid 2 like 3 [Source:HGNC Symbol;Acc:HGNC:7783]	-	-
ENSOCUG00000015585	13.77544506	22.66457064	4.886319468	0.215592854	-2.213618736	0.012288104	0.631027824	2	159396688	159478034	+	6659	OTOF	GO:0005509;GO:0005509;GO:0016021;GO:0016021;GO:0016079;GO:0016079;GO:0098793;GO:0005509;GO:0016021;GO:0016079;	K19949	-	M;U	09TCK;12QQ5;KOG1326;0DI4C;1CSUS;0V4BR;0UINT;1AUK9	otoferlin [Source:HGNC Symbol;Acc:HGNC:8515]	100354010	-
ENSOCUG00000001723	47.79741133	27.43978973	68.15503292	2.483803031	1.312550771	0.012336904	0.631027824	3	92468416	92672914	+	11190	ZFHX4	GO:0003676;GO:0003676;GO:0003677;GO:0003677;GO:0003677;GO:0005634;GO:0006355;GO:0006355;GO:0008270;GO:0008270;GO:0043565;GO:0043565;GO:0046872;	K09380	-	O;K	KOG1146;1CQHS;0DFUB;0V6ER;09VFJ;0UJEA;12PN6;1AWNN	zinc finger homeobox 4 [Source:HGNC Symbol;Acc:HGNC:30939]	100342782	G1SG02
ENSOCUG00000029357	1235.063415	1804.393516	665.7333151	0.36895129	-1.438497735	0.012336982	0.631027824	15	40905508	40928089	-	2152	-	GO:0003735;GO:0005840;GO:0006412;GO:0003735;GO:0005840;GO:0006412;GO:0003735;GO:0003735;GO:0005840;GO:0005840;GO:0006412;GO:0006412;GO:0003735;GO:0005840;GO:0006412;	-	-	-	-	-	-	-
ENSOCUG00000026208	591.1726318	427.8120102	754.5332534	1.763702831	0.818607499	0.012354907	0.631027824	GL018847	621000	638248	+	1474	ST6GALNAC6	GO:0006486;GO:0008373;GO:0001574;GO:0001665;GO:0005737;GO:0005794;GO:0006486;GO:0006486;GO:0006677;GO:0006687;GO:0008373;GO:0008373;GO:0008373;GO:0008373;GO:0009100;GO:0009312;GO:0016020;GO:0016021;GO:0016740;GO:0016757;GO:0097503;GO:0006486;GO:0008373;	K03376	EC:2.4.99.-	G	0UFNG;0DENS;0V4AN;1ARHZ;1CPCK;09TBH;KOG2692;12PSH	ST6 N-acetylgalactosaminide alpha-2,6- sialyltransferase 6 [Source:HGNC Symbol;Acc:HGNC:23364]	100357190	-
ENSOCUG00000025509	416.816991	93.52005306	740.1139289	7.913959677	2.984399715	0.012418312	0.632367219	4	50159154	50247358	-	1825	TSPAN8	GO:0007283;GO:0009986;GO:0010468;GO:0016021;GO:0016021;GO:0016020;GO:0016021;GO:0016021;GO:0016021;	K17349	-	S;G	13S8W;KOG3882;0VFGM;0A2B5;0DQZW;0UUNR;1D1G8;1AWA8	tetraspanin 8 [Source:HGNC Symbol;Acc:HGNC:11855]	103348328	G1TFJ6
ENSOCUG00000024959	4.767191685	9.206263666	0.328119703	0.03564092	-4.810321627	0.012532984	0.634100287	17	42021323	42021916	-	594	-	GO:0003677;GO:0003677;GO:0003677;GO:0005634;GO:0005634;GO:0005634;	-	-	K	0VNE6;13Y3E;KOG0381	-	-	-
ENSOCUG00000005813	15.33231607	6.019868924	24.64476321	4.093903626	2.03347714	0.012580857	0.634100287	13	133163270	133163944	+	675	RNF186	GO:0004842;GO:0005789;GO:0016020;GO:0016021;GO:0035519;GO:0043161;GO:0051865;GO:0061630;GO:0061630;GO:0070059;GO:0070534;GO:0070585;	-	-	O	KOG2177;0UHDE;13PRU;0DS4B;1D1D7;1ASAU;0A0F0;0VFGP	ring finger protein 186 [Source:HGNC Symbol;Acc:HGNC:25978]	100344925	G1SPQ4
ENSOCUG00000011871	397.7965936	227.716435	567.8767523	2.493789051	1.318339433	0.012633031	0.634100287	GL018853	11422	93330	+	5592	-	GO:0016020;GO:0016021;	-	-	S	0V5RH;0DG1K;09US1;12RCY;1CQR6;0UHMQ;1AT8B;0IFU4	-	100347791	-
ENSOCUG00000016823	321.0459195	231.3754373	410.7164017	1.775108051	0.827906844	0.012680109	0.634100287	10	47820673	47993152	+	5148	COBL	GO:0003779;GO:0003779;GO:0003785;GO:0003785;GO:0003779;GO:0003779;GO:0003785;GO:0003785;GO:0003785;GO:0003785;	K18623	-	Z	1CV0J;0UMC7;12THG;0DK6J;09YS5;0V9PZ;0IJC4;1AZ22	cordon-bleu WH2 repeat protein [Source:HGNC Symbol;Acc:HGNC:22199]	100344734	-
ENSOCUG00000016787	207.6734629	114.164063	301.1828627	2.638158232	1.399531097	0.012715952	0.634100287	9	103720496	103741056	+	1744	SERPINB5	GO:0002009;GO:0004867;GO:0004867;GO:0005615;GO:0005615;GO:0005737;GO:0005737;GO:0010951;GO:0030198;GO:0050678;GO:0060512;	K10139	-	V	09WWT;1AW36;1CSXS;0UKKZ;KOG2392;12T67;0V7V2;0DI7B	serpin family B member 5 [Source:HGNC Symbol;Acc:HGNC:8949]	100338403	-
ENSOCUG00000007324	231.77041	299.5829268	163.9578931	0.547287173	-0.869630051	0.012748933	0.634100287	X	4755793	4857144	-	3456	ADGRG2	GO:0004888;GO:0004888;GO:0004930;GO:0004930;GO:0005829;GO:0005886;GO:0007166;GO:0007166;GO:0007186;GO:0007186;GO:0016020;GO:0016021;GO:0016021;GO:0016021;GO:0004888;GO:0004888;GO:0004930;GO:0004930;GO:0007166;GO:0007166;GO:0007186;GO:0007186;GO:0016020;GO:0016021;GO:0016021;GO:0016021;GO:0004888;GO:0004930;GO:0007166;GO:0007186;GO:0016021;	K00993	EC:2.7.8.1	T	1AYXT;1CRRY;12R5K;0UGG5;09VTE;0V6S6;0DH1R;KOG4193	adhesion G protein-coupled receptor G2 [Source:HGNC Symbol;Acc:HGNC:4516]	100355893	-
ENSOCUG00000016484	61.0495891	90.94363813	31.15554006	0.342580753	-1.545483994	0.012769352	0.634100287	21	4922300	4930900	-	1478	AIFM3	GO:0016491;GO:0016491;GO:0051537;GO:0051537;GO:0055114;GO:0055114;GO:0005739;GO:0005743;GO:0005783;GO:0005829;GO:0016491;GO:0051537;GO:0055114;GO:0097194;	K22747	-	Q;C;P	KOG1336;09UFR;0DFRE;1AYZ0;12NZZ;1CQF0;0UTGA;0V5F4	apoptosis inducing factor mitochondria associated 3 [Source:HGNC Symbol;Acc:HGNC:26398]	100345791	-
ENSOCUG00000013833	363.9040922	264.5539868	463.2541975	1.751076229	0.808241889	0.012787395	0.634100287	3	31615788	31656265	+	3744	PPARGC1B	GO:0003676;GO:0003712;GO:0008134;GO:0030331;GO:0003676;GO:0003676;GO:0003712;GO:0003712;GO:0003723;GO:0008134;GO:0008134;GO:0030331;GO:0030331;GO:1903506;GO:0001503;GO:0003676;GO:0003712;GO:0003712;GO:0005634;GO:0005654;GO:0006355;GO:0006390;GO:0007015;GO:0008134;GO:0010694;GO:0016592;GO:0030331;GO:0030331;GO:0030374;GO:0030520;GO:0034614;GO:0042327;GO:0045672;GO:0045780;GO:0045892;GO:0045893;GO:…	K17962	-	K	13MSU;0IIJJ;0VE30;1CZZX;1AZ1A;0A38A;0UMMB;0DQVV	PPARG coactivator 1 beta [Source:HGNC Symbol;Acc:HGNC:30022]	100340477	-
ENSOCUG00000015434	679.2591925	494.9215743	863.5968108	1.744916479	0.803157983	0.012787888	0.634100287	12	126999350	127245281	-	3951	MAP3K5	GO:0000165;GO:0000166;GO:0000186;GO:0000187;GO:0000287;GO:0004672;GO:0004672;GO:0004672;GO:0004709;GO:0004709;GO:0005524;GO:0005524;GO:0005524;GO:0005524;GO:0006468;GO:0006468;GO:0006468;GO:0007254;GO:0008631;GO:0008631;GO:0010941;GO:0016301;GO:0016310;GO:0016740;GO:0019901;GO:0019903;GO:0019904;GO:0032991;GO:0034198;GO:0034976;GO:0034976;GO:0038066;GO:0042802;GO:0042803;GO:0043065;GO:0043065;GO:…	-	-	T	KOG4279;1AZCE;1CQKN;12T6E;0DFXB;0UPQ9;0V9A0;09X0J	mitogen-activated protein kinase kinase kinase 5 [Source:HGNC Symbol;Acc:HGNC:6857]	100340498	-
ENSOCUG00000023170	16.46543312	26.86760275	6.06326349	0.22567192	-2.14770118	0.012903289	0.636922946	8	34900796	34955931	+	5662	-	GO:0004866;GO:0004866;GO:0005576;GO:0005576;GO:0005615;GO:0005615;GO:0010951;GO:0004866;GO:0005576;GO:0005615;GO:0004866;GO:0005576;GO:0005615;GO:0004866;GO:0005576;GO:0005615;GO:0004866;GO:0005576;GO:0005615;GO:0004866;GO:0005576;GO:0005615;GO:0004866;GO:0005576;GO:0005615;GO:0004866;GO:0005576;GO:0005615;GO:0004866;GO:0005576;GO:0005615;GO:0004866;GO:0005576;GO:0005615;	-	-	O	1DCAY;0KCRI;14SX7;0AZST;0E5AX;0V0TU;1B9T0;0WC94	-	100353846	-
ENSOCUG00000000300	1053.68323	1333.594018	773.772443	0.580215892	-0.785338283	0.012922794	0.636922946	GL018760	97146	103857	+	2160	MCM7	GO:0000166;GO:0003677;GO:0003677;GO:0003677;GO:0003678;GO:0003678;GO:0003678;GO:0003678;GO:0003678;GO:0003697;GO:0004386;GO:0005524;GO:0005524;GO:0005524;GO:0005634;GO:0005634;GO:0005634;GO:0005654;GO:0005829;GO:0006260;GO:0006260;GO:0006260;GO:0006268;GO:0006270;GO:0006270;GO:0006974;GO:0007049;GO:0008283;GO:0016787;GO:0042325;GO:0042555;GO:0042555;GO:0042555;GO:0071466;GO:0000166;GO:0003677;GO:…	K02210	EC:3.6.4.12	L	0UI6Q;09V89;1CW7P;0V67T;1AZQJ;12N92;0DP6P;KOG0482	minichromosome maintenance complex component 7 [Source:HGNC Symbol;Acc:HGNC:6950]	100343855	G1SD05
ENSOCUG00000013527	1384.139823	1025.505896	1742.773751	1.699428309	0.765049502	0.012971938	0.636922946	GL018738	2329363	2444316	-	1563	ABHD2	GO:0003707;GO:0008126;GO:0032570;GO:0033878;GO:0036126;GO:0042562;GO:0043401;GO:0046464;GO:0047372;GO:0048240;GO:0097524;	-	-	S;U	12STH;0DIN5;09XAS;0V895;1ARWZ;KOG1838;0UUB3;1CTD2	abhydrolase domain containing 2 [Source:HGNC Symbol;Acc:HGNC:18717]	-	-
ENSOCUG00000010152	323.6267152	234.2023846	413.0510458	1.763650044	0.818564319	0.012994606	0.636922946	8	32420653	32443570	-	1556	SCNN1A	GO:0005272;GO:0005272;GO:0005272;GO:0005737;GO:0005887;GO:0006811;GO:0006814;GO:0006814;GO:0006814;GO:0015280;GO:0015280;GO:0015280;GO:0016020;GO:0016020;GO:0016020;GO:0016021;GO:0016021;GO:0016021;GO:0016324;GO:0031514;GO:0034706;GO:0035725;GO:0050699;GO:0050891;GO:0055078;GO:0060170;GO:0070062;	K04824	-	P	0DPMB;0VCUQ;0USYR;KOG4294;09UR8;1CYKB;1B16M;13JS2	sodium channel epithelial 1 alpha subunit [Source:HGNC Symbol;Acc:HGNC:10599]	100009488	O97741
ENSOCUG00000009624	382.2165887	178.7843109	585.6488665	3.275728523	1.711815798	0.013065367	0.638551042	2	37081782	37087890	+	2308	SLC10A4	GO:0016020;GO:0016020;GO:0016020;GO:0016021;	K14344	-	P	0DIV3;0UMGR;12QJB;0V8FN;09XHM;1CTKF;KOG2718;1AWZC	solute carrier family 10 member 4 [Source:HGNC Symbol;Acc:HGNC:22980]	100343028	G1SXK4
ENSOCUG00000025109	1229.524621	1558.532517	900.5167252	0.577797842	-0.791363279	0.013151808	0.638895265	1	12513009	12513528	+	474	-	GO:0003735;GO:0003735;GO:0005840;GO:0005840;GO:0006412;GO:0006412;	-	-	J	0DTK0;1D2XG;13RID;0A6JX;KOG0893;0VHE2	-	-	-
ENSOCUG00000004201	1183.174868	875.2707086	1491.079027	1.703563266	0.768555526	0.013181554	0.638895265	16	61114818	61241979	+	4013	LPGAT1	GO:0016746;GO:0016746;GO:0005737;GO:0016020;GO:0016021;GO:0016746;GO:0016746;GO:0045723;	K13514	EC:2.3.1.-	I	0UR71;0VE55;0DMYR;13FFC;1CWUN;0A3AD;1B131;KOG1505	lysophosphatidylglycerol acyltransferase 1 [Source:HGNC Symbol;Acc:HGNC:28985]	100347514	-
ENSOCUG00000002320	692.2217241	881.3116902	503.131758	0.57088969	-0.808716086	0.013254531	0.638895265	21	3728628	3742016	-	2877	PIK3IP1	GO:0014067;GO:0014067;GO:0016020;GO:0016021;GO:0036313;GO:0043553;GO:0043553;	-	-	T	13HM9;1ASY4;0V881;0DIM4;1CTC2;09X9M;0UHAK;0IIHU	phosphoinositide-3-kinase interacting protein 1 [Source:HGNC Symbol;Acc:HGNC:24942]	100357093	G1SHA5
ENSOCUG00000011124	25.91184695	38.83220147	12.99149243	0.334554621	-1.579686325	0.013255468	0.638895265	3	52642090	52712398	+	2717	FGF18	GO:0001503;GO:0001525;GO:0001957;GO:0001958;GO:0002063;GO:0005104;GO:0005105;GO:0005111;GO:0005576;GO:0005730;GO:0008083;GO:0008284;GO:0008543;GO:0008543;GO:0030324;GO:0030949;GO:0032332;GO:0043406;GO:0043536;GO:0045766;GO:0070374;GO:2000546;GO:0005104;GO:0005104;GO:0005576;GO:0005576;GO:0008083;GO:0008083;GO:0008083;GO:0008543;GO:0008543;GO:0005104;GO:0005576;GO:0008083;GO:0008543;	K04358	-	T	12ST7;0VBAZ;KOG3885;1CWXU;1B487;0URAB;0DN1J;0A0EN	fibroblast growth factor 18 [Source:HGNC Symbol;Acc:HGNC:3674]	100340478	G1T0N7
ENSOCUG00000024644	2696.913077	3384.065716	2009.760438	0.593889305	-0.751734041	0.013275531	0.638895265	16	47977830	48043332	+	2129	-	GO:0000786;GO:0000786;GO:0000786;GO:0003677;GO:0003677;GO:0003677;GO:0005634;GO:0005694;GO:0046982;GO:0046982;GO:0000786;GO:0003677;GO:0046982;GO:0000786;GO:0003677;GO:0046982;GO:0000786;GO:0003677;GO:0046982;	K11253	-	B	KOG1745;0VHGA;0DTMN;0UV0S;1B5EX;0A6N5;13PQG;1D2Z6	Histone H3.3 [Source:UniProtKB/Swiss- Prot;Acc:P84246]	100328923	P84246
ENSOCUG00000033220	45.43649475	5.892300497	84.98068901	14.42232776	3.850232129	0.013315366	0.638895265	GL018760	4974	5839	-	628	-	GO:0005743;GO:0005743;GO:0033617;GO:0033617;	-	-	S	1D3P1;13WZE;0UVEE;0VIN5;0J3VJ;0A8TF;0DUIV;1B6HE	-	-	-
ENSOCUG00000000805	154.596678	104.3636603	204.8296956	1.962653427	0.972805439	0.013335361	0.638895265	10	14433678	14445151	-	1749	FKBP14	GO:0000413;GO:0003755;GO:0003755;GO:0003755;GO:0005509;GO:0005509;GO:0016853;GO:0003755;	K09577	EC:5.2.1.8	O	0V9SB;09YUE;KOG0549;1CV30;0UFT8;12UAQ;0DK95;1ARN7	FKBP prolyl isomerase 14 [Source:HGNC Symbol;Acc:HGNC:18625]	100344912	G1SE41
ENSOCUG00000004441	55.15626077	75.55615197	34.75636957	0.460007143	-1.120271833	0.0135149	0.642059581	18	18330016	18354877	+	1693	PBLD	GO:0003824;GO:0005737;GO:0009058;GO:0010633;GO:0010719;GO:0030277;GO:0030512;GO:0042802;GO:0050680;GO:0060392;GO:0060394;GO:0003824;GO:0003824;GO:0009058;GO:0009058;	-	-	A;S	0UQKE;1355Q;0DNAT;0A02Z;0VBJN;1B0BX;1CX7T;KOG3033	phenazine biosynthesis like protein domain containing [Source:HGNC Symbol;Acc:HGNC:23301]	100342477	G1SLT6
ENSOCUG00000005174	1659.142821	2080.63403	1237.651611	0.594843492	-0.749417962	0.013525668	0.642059581	13	24289737	24323501	+	3325	DPT	GO:0008285;GO:0030199;	-	-	S;W	09V5V;0V65E;1CR4D;0DGEU;0UI75;12R0R;1AVBH;0IGCN	dermatopontin [Source:HGNC Symbol;Acc:HGNC:3011]	100341183	G1SNC7
ENSOCUG00000002802	278.5829021	196.5134881	360.6523161	1.835254769	0.875980351	0.013535394	0.642059581	GL018802	160108	221924	-	3865	-	GO:0006281;GO:0006281;	-	-	S;L	KOG4712;12RQE;1CSGZ;09WHD;0UK1X;0DHSP;1B2EP;0V7FU	-	100346581	G1SIC9
ENSOCUG00000003894	25.2709379	38.27008078	12.27179501	0.320662898	-1.640870657	0.01355241	0.642059581	13	42113625	42125133	+	3069	SV2A	GO:0005623;GO:0005783;GO:0005887;GO:0005911;GO:0006874;GO:0007268;GO:0007268;GO:0008021;GO:0016020;GO:0016020;GO:0016020;GO:0016021;GO:0016021;GO:0016021;GO:0016082;GO:0019901;GO:0022857;GO:0022857;GO:0031594;GO:0043005;GO:0048786;GO:0055085;GO:0055085;GO:0098978;GO:0098982;	K06258	-	O;U	0V3E1;13E7P;0IRID;0E8R3;0B55P;0WHRT;1DFN7;1BB6X	synaptic vesicle glycoprotein 2A [Source:HGNC Symbol;Acc:HGNC:20566]	100349415	G1SKN4
ENSOCUG00000008499	85.61396831	44.04287893	127.1850577	2.887755314	1.529948505	0.013591181	0.642107786	11	64991608	65079991	-	2026	FGF10	GO:0000132;GO:0000187;GO:0001656;GO:0001759;GO:0001823;GO:0001974;GO:0003338;GO:0005104;GO:0005104;GO:0005104;GO:0005111;GO:0005576;GO:0005576;GO:0005615;GO:0005615;GO:0005623;GO:0005634;GO:0005886;GO:0006935;GO:0007267;GO:0007368;GO:0007431;GO:0007435;GO:0008083;GO:0008083;GO:0008083;GO:0008083;GO:0008201;GO:0008284;GO:0008285;GO:0008543;GO:0008543;GO:0008544;GO:0008589;GO:0009880;GO:0009887;GO:…	K04358	-	T	0DGZM;0UIZA;KOG3885;09VR2;1CRPW;13KAJ;1AUG8;0V6Q2	fibroblast growth factor 10 [Source:HGNC Symbol;Acc:HGNC:3666]	100342802	G1SVA6
ENSOCUG00000003137	94.95925937	63.80940179	126.109117	1.976340687	0.982831664	0.013876936	0.653050981	15	16126444	16516428	+	4531	NR3C2	GO:0003700;GO:0005634;GO:0006355;GO:0008270;GO:0043565;GO:0003700;GO:0005634;GO:0006355;GO:0008270;GO:0043565;GO:0003677;GO:0003700;GO:0003700;GO:0005634;GO:0005634;GO:0005634;GO:0005654;GO:0006355;GO:0006355;GO:0008270;GO:0008270;GO:0043235;GO:0043565;GO:0043565;GO:0046872;GO:1901224;GO:0003700;GO:0005634;GO:0006355;GO:0008270;GO:0043565;GO:0003700;GO:0005634;GO:0006355;GO:0008270;GO:0043565;	K08555	-	K	0V73B;1AV18;0DHE4;09W50;12PPW;1CS48;0UJIN;KOG3575	nuclear receptor subfamily 3 group C member 2 [Source:HGNC Symbol;Acc:HGNC:7979]	100358449	G1SJ35
ENSOCUG00000006877	133.288114	84.6225149	181.9537132	2.150180876	1.104458026	0.013899603	0.653050981	GL018852	140038	189351	-	2283	TFCP2L1	GO:0003700;GO:0003700;GO:0006357;GO:0006357;GO:0003700;GO:0006357;	K09275	-	K	09V54;0DGEB;KOG4091;1CR3T;12P4E;0UM5H;1B0TC;0V64U	transcription factor CP2 like 1 [Source:HGNC Symbol;Acc:HGNC:17925]	100347026	-
ENSOCUG00000015564	349.1960507	229.3334745	469.0586268	2.04531252	1.032321301	0.013999759	0.65556765	14	39879202	39909590	-	1845	PLSCR4	GO:0017121;GO:0017121;GO:0017128;GO:0017128;GO:0017121;GO:0017128;GO:0005886;GO:0017121;GO:0017128;GO:0019899;GO:0042609;GO:0071222;	-	-	M	09WNV;1CSP3;13N4Y;0V7ME;1B27S;KOG0621;0DHYI;0UI9Q	phospholipid scramblase 4 [Source:HGNC Symbol;Acc:HGNC:16497]	100340592	G1T9Q7
ENSOCUG00000009197	757.3466139	1040.24966	474.4435672	0.45608625	-1.132621417	0.014030258	0.65556765	3	118775633	118860133	+	2995	DCAF13	GO:0005515;GO:0005654;GO:0005730;GO:0005813;GO:0005829;GO:0030054;GO:0005515;GO:0005515;GO:0005515;GO:0005515;	K11806	-	A;W	0DK4Q;0VA5A;KOG0268;1ARA9;0UT9J;0A05Z;12NZ7;1CUYI;1AT4G;13KV9;0DFYZ;0IHSA;1CQNE;0A52A;0UHI1;0VG2W	DDB1 and CUL4 associated factor 13 [Source:HGNC Symbol;Acc:HGNC:24535]	100339716	G1SWR6
ENSOCUG00000021757	30.09252367	44.32215606	15.86289128	0.357899811	-1.482372313	0.01453225	0.677099292	17	8089853	8093042	-	752	SNX22	GO:0035091;GO:0035091;	K17941	-	Z;D;U	1DC9Q;0E59Q;0WC7I;1B9SB;14SVJ;0KCPZ;0AZRB;0V0ST	sorting nexin 22 [Source:HGNC Symbol;Acc:HGNC:16315]	100352604	-
ENSOCUG00000025915	32.53625786	47.27638231	17.79613342	0.376427564	-1.409555822	0.014570693	0.677099292	15	4571964	4572602	-	357	-	GO:0005761;GO:0005761;	K17429	-	J	0A3B3;0VE5V;1D02Z;1AX04;0UG6J;13SA0;0DQYR;KOG4060	-	100340423	G1TS94
ENSOCUG00000015312	959.685326	715.1867674	1204.183885	1.683733452	0.751663767	0.014918424	0.691369358	1	112364735	112638071	+	1617	PDGFD	GO:0005161;GO:0005161;GO:0008083;GO:0008083;GO:0016020;GO:0016020;GO:0048008;GO:0048008;GO:0050730;GO:0071230;	-	-	W;T	0URGY;12SXU;0IGUN;0DN70;1AV3H;0A0JR;0VBG3;1CX3M	platelet derived growth factor D [Source:HGNC Symbol;Acc:HGNC:30620]	-	-
ENSOCUG00000016003	1075.420138	789.9021198	1360.938157	1.722919996	0.784855711	0.015054945	0.695800263	16	34452022	34495175	-	1043	KCNK1	GO:0005242;GO:0005267;GO:0005267;GO:0005267;GO:0005267;GO:0005267;GO:0005272;GO:0005272;GO:0005768;GO:0005768;GO:0005886;GO:0005887;GO:0005887;GO:0005887;GO:0006811;GO:0006813;GO:0016020;GO:0016020;GO:0016020;GO:0016021;GO:0016021;GO:0016021;GO:0016021;GO:0016324;GO:0022841;GO:0022841;GO:0030054;GO:0030425;GO:0031410;GO:0034705;GO:0034705;GO:0035725;GO:0035725;GO:0042802;GO:0042995;GO:0043204;GO:…	K04912	-	P	0VCNN;0DQ8A;13M4Z;0A2KP;0UR1J;KOG1418;1AYUQ;1CZ9Y	Oryctolagus cuniculus potassium two pore domain channel subfamily K member 1 (KCNK1), mRNA. [Source:RefSeq mRNA;Acc:NM_001082180]	100008962	Q5UE96
ENSOCUG00000005390	441.3902517	561.337807	321.4426964	0.572636819	-0.804307659	0.015103489	0.695834756	GL018760	111009	121439	+	4269	ZNF3	GO:0003676;GO:0003676;GO:0006355;GO:0042802;	-	-	K	0VD76;1417X;0DJFZ;0A2B9;KOG1721;0UN6Q;1CU8G;1AUNA	zinc finger protein 3 [Source:HGNC Symbol;Acc:HGNC:13089]	-	-
ENSOCUG00000024485	157.9145243	100.4934036	215.3356449	2.142783875	1.099486345	0.015137515	0.695834756	13	131622952	131670212	+	2311	RAP1GAP	GO:0005096;GO:0005096;GO:0005096;GO:0030695;GO:0030695;GO:0043547;GO:0050790;GO:0051056;GO:0051056;GO:0005096;GO:0030695;GO:0051056;	K17700	-	T	0DGI0;0UIBJ;1CR7R;1ATVS;0V68W;09V9N;12P6U;KOG3686	RAP1 GTPase activating protein [Source:HGNC Symbol;Acc:HGNC:9858]	100340849	-
ENSOCUG00000029009	180.2011308	233.8594018	126.5428598	0.541106574	-0.886015325	0.015252442	0.69922786	19	4234349	4250522	-	2959	ZNF624	GO:0003676;GO:0003676;GO:0006355;	-	-	K	0V4DW;09TES;0UR9I;KOG1721;12PGP;1B126;1CPIM;0DERT	zinc finger protein 624 [Source:HGNC Symbol;Acc:HGNC:29254]	-	-
ENSOCUG00000005005	281.9514077	207.5133835	356.389432	1.71742866	0.780250172	0.015429757	0.705455142	GL019208	84994	106615	+	2453	RFX2	GO:0003677;GO:0003677;GO:0003700;GO:0003700;GO:0005634;GO:0005634;GO:0006355;GO:0006355;GO:0003677;GO:0003677;GO:0003700;GO:0003700;GO:0005634;GO:0005634;GO:0006355;GO:0006355;GO:0003677;GO:0003700;GO:0005634;GO:0006355;	K09173	-	K	12TQY;1AWBV;KOG3712;0DIA9;1CT46;09WZW;0UKVU;0V7XX	regulatory factor X2 [Source:HGNC Symbol;Acc:HGNC:9983]	100350548	-
ENSOCUG00000002819	507.2055761	376.5006972	637.910455	1.69431414	0.760701387	0.015559492	0.709479462	GL018802	72485	131548	-	2739	IRAK2	GO:0001959;GO:0001959;GO:0001959;GO:0002755;GO:0002755;GO:0004672;GO:0004672;GO:0005515;GO:0005524;GO:0005524;GO:0006468;GO:0006468;GO:0006954;GO:0006954;GO:0007165;GO:0007165;GO:0007249;GO:0007249;GO:0031663;GO:0032088;GO:0042803;GO:0043433;GO:0046982;GO:0051092;GO:0051092;GO:0070498;GO:0070498;GO:0070498;GO:0070555;	K04731	EC:2.7.11.1	T	0VCW6;KOG1187;1B38V;1CYMY;0DPNZ;0A211;0UT05;13JWZ	interleukin 1 receptor associated kinase 2 [Source:HGNC Symbol;Acc:HGNC:6113]	103345503	-
ENSOCUG00000001178	49.40223312	80.6717259	18.13274035	0.22477194	-2.153466149	0.015660255	0.710073409	13	26731585	26821921	+	1270	FAM78B	-	-	-	S	1AW85;0V77E;0DHIE;12XHJ;09W93;0USEW;1CS8N;0IGXQ	family with sequence similarity 78 member B [Source:HGNC Symbol;Acc:HGNC:13495]	100342973	G1SEX1
ENSOCUG00000011636	11490.18466	8613.391632	14366.97769	1.667981476	0.738103267	0.015667991	0.710073409	GL018699	2138850	2143633	+	2359	HSPA5	GO:0000166;GO:0005524;GO:0005524;GO:0005634;GO:0005737;GO:0005739;GO:0005783;GO:0005788;GO:0005788;GO:0005789;GO:0005793;GO:0005793;GO:0005829;GO:0005886;GO:0006983;GO:0008180;GO:0009986;GO:0016887;GO:0019899;GO:0019904;GO:0021589;GO:0021680;GO:0030176;GO:0030335;GO:0030496;GO:0030512;GO:0030968;GO:0031204;GO:0031398;GO:0031625;GO:0032991;GO:0034663;GO:0034663;GO:0035437;GO:0042149;GO:0043022;GO:…	K09490	-	O	0DNDC;1CXAH;0A1W7;0UKC7;KOG0101;12PIY;0VCRV;1B1P4	heat shock protein family A (Hsp70) member 5 [Source:HGNC Symbol;Acc:HGNC:5238]	100008764	-
ENSOCUG00000035420	41.46120096	24.65840851	58.26399341	2.362844844	1.240524898	0.015697766	0.710073409	GL018811	419620	420789	-	1170	-	-	-	-	-	-	-	-	-
ENSOCUG00000004145	590.7654724	441.3493736	740.1815712	1.677087621	0.745958066	0.015933006	0.717075352	GL018705	5680360	5786635	-	7101	ATP7B	GO:0000166;GO:0000166;GO:0000166;GO:0005507;GO:0005507;GO:0005524;GO:0006812;GO:0006812;GO:0016020;GO:0016021;GO:0016021;GO:0016021;GO:0019829;GO:0019829;GO:0030001;GO:0030001;GO:0046872;GO:0046872;GO:0046872;GO:0098655;GO:0000166;GO:0005375;GO:0005507;GO:0005507;GO:0005524;GO:0005770;GO:0005794;GO:0005802;GO:0006812;GO:0006825;GO:0015677;GO:0016021;GO:0016323;GO:0019829;GO:0030001;GO:0031410;GO:…	K17686	EC:7.2.2.8	P	0V7QK;09WSA;1AU3S;1CSSK;0DI1Y;0UJGB;KOG0207;12P75	ATPase copper transporting beta [Source:HGNC Symbol;Acc:HGNC:870]	100344865	-
ENSOCUG00000002356	238.9948535	313.1878804	164.8018266	0.526207548	-0.926296152	0.016033133	0.717075352	13	33180242	33195694	+	3320	IGSF9	GO:0005515;GO:0007156;GO:0016020;GO:0016021;GO:0016358;GO:0030424;GO:0030425;GO:0050807;GO:0060077;GO:0098632;	K22655	-	T	0IQJK	immunoglobulin superfamily member 9 [Source:HGNC Symbol;Acc:HGNC:18132]	100346549	-
ENSOCUG00000013725	1272.698522	926.5898271	1618.807218	1.747059131	0.804928438	0.016059197	0.717075352	19	52443755	52497803	-	2173	FAM20A	GO:0001934;GO:0001934;GO:0005615;GO:0005623;GO:0005783;GO:0005794;GO:0005794;GO:0009617;GO:0031214;GO:0043539;GO:0044691;GO:0055074;GO:0070166;GO:0070166;GO:0071902;	K21957	-	S;P	1AXVN;09UK5;12R04;0DHQ7;0UMAE;KOG3829;0V5JE;1CSEI	FAM20A golgi associated secretory pathway pseudokinase [Source:HGNC Symbol;Acc:HGNC:23015]	100353963	G1T606
ENSOCUG00000028052	1664.042433	2092.543256	1235.541609	0.590449734	-0.760113849	0.016084601	0.717075352	14	28296132	28308485	-	3899	AMOTL2	GO:0005923;GO:0016324;GO:0031410;GO:0042802;	K06104	-	Z	1AVIX;09UPC;0DFZ2;1CQNH;0IEF3;0UHIB;12P38;0V5NZ	angiomotin like 2 [Source:HGNC Symbol;Acc:HGNC:17812]	100345255	-
ENSOCUG00000014438	633.6033029	424.479678	842.7269278	1.985317488	0.989369739	0.016104484	0.717075352	12	10965701	11005499	+	1116	-	GO:0000786;GO:0000786;GO:0003677;GO:0003677;GO:0003677;GO:0005634;GO:0005634;GO:0005634;GO:0005694;GO:0006334;GO:0006334;	K11275	-	B	1B61K;13XYX;0VIPX;0DUJW;0UVMN;KOG4012;1D3XF;0A7V5	-	100347493	G1TQ05
ENSOCUG00000001912	2119.833478	2636.0233	1603.643656	0.608357163	-0.717009525	0.016105526	0.717075352	9	16103765	16148590	-	6741	PLXNB1	GO:0002116;GO:0005515;GO:0005887;GO:0007162;GO:0007165;GO:0007165;GO:0008360;GO:0008360;GO:0014068;GO:0016020;GO:0016021;GO:0017154;GO:0017154;GO:0017154;GO:0017154;GO:0032794;GO:0033689;GO:0043547;GO:0043931;GO:0048812;GO:0050772;GO:0051493;GO:0071526;GO:0071526;GO:0071526;GO:0071526;GO:1900220;GO:1904862;GO:0005515;GO:0007165;GO:0017154;GO:0071526;	K06821	-	T	1CRZ7;1AZY2;12RMW;09UD0;0UJBM;0V5C8;0DFNS;KOG3610	plexin B1 [Source:HGNC Symbol;Acc:HGNC:9103]	100342042	-
ENSOCUG00000003594	1160.72785	1435.138061	886.317638	0.617583536	-0.695293803	0.016254031	0.720218501	13	31039119	31072446	+	2405	OLFML2B	GO:0030198;GO:0031012;GO:0050840;	-	-	W	0V58X;12NMM;0UH28;1AZIB;1CQ97;09U9S;KOG3545;0DFJG	olfactomedin like 2B [Source:HGNC Symbol;Acc:HGNC:24558]	100338751	G1SK08
ENSOCUG00000009616	96.8150192	64.80424271	128.8257957	1.987922246	0.991261329	0.016260813	0.720218501	3	90851184	90900716	+	2271	CRISPLD1	GO:0005576;GO:0005576;GO:0060325;	-	-	S;O;T;W;V	136J3;09UFX;0UH6Y;1AY5R;KOG3017;0DFRN;1CQF8;0V5FA	cysteine rich secretory protein LCCL domain containing 1 [Source:HGNC Symbol;Acc:HGNC:18206]	-	-
ENSOCUG00000016083	2823.890557	2146.552038	3501.229077	1.631094432	0.705840309	0.016336329	0.721683862	13	72582178	72765425	+	2659	TGFBR3	GO:0001837;GO:0005024;GO:0005114;GO:0005576;GO:0006955;GO:0007179;GO:0009897;GO:0015026;GO:0016020;GO:0016021;GO:0030509;GO:0032354;GO:0034673;GO:0034695;GO:0034699;GO:0035556;GO:0043235;GO:0046332;GO:0050431;GO:0051271;GO:0060317;GO:0060389;GO:0070123;	K05843	-	T	13JHN;1AWIV;0A229;0DRCK;0UUA3;0VAQX;1CZZ0;0IK7K	transforming growth factor beta receptor 3 [Source:HGNC Symbol;Acc:HGNC:11774]	100342897	G1TAV9
ENSOCUG00000002646	129.621782	38.82097055	220.4225934	5.677925881	2.505364016	0.016383667	0.721900009	GL018800	26897	28623	-	669	-	-	-	-	S	1D436;0DUSB;13XQM;0A7HD;0J4VC;1B66M;0UVSK;0VJ2E	-	-	-
ENSOCUG00000009797	271.3627451	197.0208502	345.7046401	1.754660178	0.811191654	0.016539898	0.726900731	13	70391409	70529555	+	7021	ABCA4	GO:0000166;GO:0001750;GO:0005524;GO:0005524;GO:0005524;GO:0005783;GO:0005887;GO:0005887;GO:0006649;GO:0006869;GO:0006869;GO:0007601;GO:0007601;GO:0007601;GO:0016020;GO:0016021;GO:0016021;GO:0016021;GO:0016887;GO:0016887;GO:0016887;GO:0042626;GO:0042626;GO:0045332;GO:0045494;GO:0055085;GO:0055085;GO:0090555;GO:0140326;GO:0140327;GO:0140347;	K05644	-	Q	0V4GH;12P2M;1CWAS;KOG0059;09THI;0UGH8;0DMFG;1AS9I	ATP binding cassette subfamily A member 4 [Source:HGNC Symbol;Acc:HGNC:34]	100337818	-
ENSOCUG00000015998	446.3949695	327.2620305	565.5279085	1.728058424	0.789151994	0.016717888	0.730937275	GL019015	135993	195422	+	3374	-	GO:0004407;GO:0004407;GO:0016575;GO:0016787;GO:0004407;	-	-	B	KOG1343	-	-	-
ENSOCUG00000013892	8602.81731	11305.75639	5899.878227	0.52184728	-0.938300434	0.016776538	0.730937275	13	108195050	108196033	+	984	TACSTD2	-	-	-	T	0DPIM;0UTBQ;0A1WG;1AT15;1CWPF;13HKF;0V7KZ;0IFI6	tumor associated calcium signal transducer 2 [Source:HGNC Symbol;Acc:HGNC:11530]	-	-
ENSOCUG00000004635	6.434332286	12.45273964	0.415924929	0.033400275	-4.903996205	0.016796255	0.730937275	4	34118790	34131252	+	2788	AQP2	GO:0003091;GO:0003097;GO:0005372;GO:0005886;GO:0005886;GO:0005887;GO:0006833;GO:0006833;GO:0015168;GO:0015250;GO:0015250;GO:0015267;GO:0015793;GO:0016020;GO:0016020;GO:0016324;GO:0016324;GO:0031410;GO:0042631;GO:0051289;GO:0055037;GO:0055085;GO:0070062;GO:0071280;GO:0071288;GO:0072205;GO:0098576;GO:0015267;GO:0015267;GO:0016020;GO:0016020;GO:0016020;GO:0016021;GO:0055085;GO:0055085;GO:0015267;GO:…	-	-	-	-	aquaporin 2 [Source:HGNC Symbol;Acc:HGNC:634]	-	-
ENSOCUG00000016385	1151.806798	722.4058337	1581.207762	2.18880813	1.130145494	0.01680365	0.730937275	13	34014966	34057190	-	2862	CADM3	GO:0016020;GO:0016021;GO:0005911;GO:0007156;GO:0007157;GO:0008104;GO:0042803;GO:0098688;GO:0099056;	K06780	-	T	0V8AN;1AWDM;13DPF;1CS0H;0DIPY;09XCF;0IFCE;0US9R	cell adhesion molecule 3 [Source:HGNC Symbol;Acc:HGNC:17601]	100350338	-
ENSOCUG00000005942	1163.610529	873.161924	1454.059133	1.665280051	0.735764816	0.016848674	0.731026142	2	40235404	40452624	+	7382	KIF13B	GO:0000166;GO:0003774;GO:0003777;GO:0003777;GO:0005515;GO:0005524;GO:0005524;GO:0005524;GO:0007018;GO:0007018;GO:0008017;GO:0008017;GO:0003777;GO:0005515;GO:0005524;GO:0007018;GO:0008017;GO:0003777;GO:0005515;GO:0005524;GO:0007018;GO:0008017;GO:0003777;GO:0005515;GO:0005524;GO:0007018;GO:0008017;GO:0003777;GO:0005515;GO:0005524;GO:0007018;GO:0008017;GO:0003777;GO:0005515;GO:0005524;GO:0007018;GO:…	K17914	-	Z	1CUEV;1B0HR;0UJWR;0V8TH;KOG0245;0DJN0;09Y8U;12QSJ	kinesin family member 13B [Source:HGNC Symbol;Acc:HGNC:14405]	100338801	-
ENSOCUG00000026874	36.73676526	52.4845676	20.98896292	0.399907323	-1.322262396	0.01689419	0.73113582	19	13955508	13979331	-	1810	TEKT1	GO:0015630;	K18628	-	Z	09XZ0;0V8EF;0UFF1;12RGE;1CU48;0DJC1;1AXY6;KOG2685	tektin 1 [Source:HGNC Symbol;Acc:HGNC:15534]	100348514	G1U264
ENSOCUG00000027971	133.3813751	175.4099645	91.35278574	0.520795874	-0.941210077	0.017076791	0.737162591	13	36968732	37027431	-	2298	SYT11	GO:0016020;GO:0016020;GO:0016020;GO:0016020;GO:0016021;GO:0000149;GO:0001778;GO:0001891;GO:0005737;GO:0005764;GO:0005802;GO:0005887;GO:0006914;GO:0007612;GO:0007613;GO:0009611;GO:0014069;GO:0016020;GO:0030425;GO:0031369;GO:0031625;GO:0031982;GO:0032009;GO:0033602;GO:0042802;GO:0043005;GO:0045335;GO:0045806;GO:0048487;GO:0050710;GO:0050765;GO:0051650;GO:0055037;GO:1900165;GO:1900424;GO:1903979;GO:…	K19911	-	-	-	synaptotagmin 11 [Source:HGNC Symbol;Acc:HGNC:19239]	100350264	G1U1U7
ENSOCUG00000012125	3.263318417	0	6.526636833	Inf	Inf	0.017130807	0.737208585	GL018702	7603801	7604124	+	324	SERTM1	GO:0016020;GO:0016021;GO:0043231;	-	-	S	1B61C;13UHI;0DVV1;0UWIG;0VKRR;0J16Q;0A9D7;1D55A	serine rich and transmembrane domain containing 1 [Source:HGNC Symbol;Acc:HGNC:33792]	103352091	G1T2N3
ENSOCUG00000000629	500.4119487	629.0496301	371.7742672	0.591009436	-0.75874693	0.017164546	0.737208585	GL018720	2174508	2511874	+	5547	ARHGEF28	GO:0005085;GO:0005089;GO:0035023;GO:0035556;GO:0035556;GO:0046872;	-	-	T	1AWF9;KOG3520;0UJ07;0V661;0DH0B;12QRG;1CRQP;09V6G	Rho guanine nucleotide exchange factor 28 [Source:HGNC Symbol;Acc:HGNC:30322]	-	-
ENSOCUG00000027981	507.0571071	722.8995688	291.2146453	0.402842466	-1.311712319	0.017222221	0.73782251	GL019631	9664	22130	-	1756	ISG15	GO:0005178;GO:0005515;GO:0005576;GO:0007229;GO:0031397;GO:0032020;GO:0032649;GO:0034340;GO:0042742;GO:0045071;GO:0051607;GO:0072608;GO:0072643;GO:0005515;	-	-	O	0DTRB;0UUZS;KOG0001;13VQF;1B5MQ;0VI08;1D338;0A6PP	ISG15 ubiquitin like modifier [Source:HGNC Symbol;Acc:HGNC:4053]	-	-
ENSOCUG00000001058	367.0905682	469.7023093	264.4788272	0.563077553	-0.828594455	0.017276265	0.738278177	17	43201486	43203072	-	369	-	GO:0046872;	-	-	T;K	KOG1701;0UHXE;0DF5J;12NDJ;0V4TG;1ATBQ;09TU6;1CPV7	-	-	-
ENSOCUG00000002492	2268.760687	1443.044927	3094.476447	2.144407557	1.100579124	0.017369798	0.739086523	7	35303108	35342248	-	1673	CD36	GO:0000122;GO:0001540;GO:0001954;GO:0005041;GO:0005041;GO:0005044;GO:0005623;GO:0005794;GO:0005794;GO:0005886;GO:0005886;GO:0006898;GO:0006910;GO:0006955;GO:0006955;GO:0007166;GO:0007166;GO:0007166;GO:0007204;GO:0007263;GO:0008035;GO:0008289;GO:0009617;GO:0009897;GO:0009986;GO:0010628;GO:0010629;GO:0010744;GO:0010744;GO:0010886;GO:0010942;GO:0016020;GO:0016020;GO:0016020;GO:0016020;GO:0016021;GO:…	K06259	-	T	0DKNT;12SAC;KOG3776;09Z6W;1AVRK;0V8QD;0URHC;1CVH9	CD36 molecule [Source:HGNC Symbol;Acc:HGNC:1663]	100008825	-
ENSOCUG00000017339	1147.696578	874.6179227	1420.775234	1.624452457	0.699953521	0.017382091	0.739086523	GL018766	470087	604548	+	6632	KIAA1671	-	-	-	S	0DRQV;0IFQ8;0VF0X;0UJT7;1D0YK;1AVA1;12U4R;0A19B	KIAA1671 [Source:HGNC Symbol;Acc:HGNC:29345]	100350449	G1TDI3
ENSOCUG00000004307	7577.926985	5804.32486	9351.52911	1.61113124	0.688074018	0.01748243	0.741499175	13	37536642	37541822	-	892	EFNA1	GO:0000122;GO:0001934;GO:0003180;GO:0003183;GO:0003199;GO:0010719;GO:0014028;GO:0016020;GO:0016020;GO:0016020;GO:0016477;GO:0030182;GO:0033628;GO:0034446;GO:0043409;GO:0043410;GO:0043535;GO:0045765;GO:0046658;GO:0046875;GO:0046875;GO:0046875;GO:0048013;GO:0048013;GO:0048013;GO:0048013;GO:0050730;GO:0050731;GO:0050770;GO:0050821;GO:0061002;GO:0061098;GO:0070244;GO:1902004;GO:1902961;GO:1903051;GO:…	K05462	-	T	0A0XA;0DNIJ;1CXFU;0VA0A;KOG3858;1B128;0UK31;13KDT	ephrin A1 [Source:HGNC Symbol;Acc:HGNC:3221]	100344921	-
ENSOCUG00000035590	11.45041871	18.84957176	4.051265662	0.214926138	-2.218087149	0.017626197	0.745737198	13	102966855	103048785	+	3587	ITGB3BP	GO:0006355;GO:0034080;GO:0005654;GO:0006355;GO:0034080;	-	-	-	-	integrin subunit beta 3 binding protein [Source:HGNC Symbol;Acc:HGNC:6157]	-	-
ENSOCUG00000010317	1979.687285	1476.959744	2482.414826	1.680759978	0.749113714	0.017696734	0.746188907	9	18620330	18623080	+	546	MANF	-	-	-	S;O	13K0K;1B31P;0VCQC;0URYU;KOG4154;0DPGT;0A1UQ;1CYF7	mesencephalic astrocyte derived neurotrophic factor [Source:HGNC Symbol;Acc:HGNC:15461]	-	-
ENSOCUG00000015565	46.24929769	66.91900081	25.57959457	0.382247109	-1.387422506	0.017748438	0.746188907	1	87949098	87983783	-	1858	KCNJ5	GO:0005242;GO:0005242;GO:0006813;GO:0008076;GO:0015467;GO:0016020;GO:0016021;GO:0086089;GO:0086091;GO:0098914;GO:1990573;GO:0005242;GO:0005242;GO:0005244;GO:0006811;GO:0006813;GO:0006813;GO:0006813;GO:0015467;GO:0015467;GO:0016020;GO:0016020;GO:0016020;GO:0016021;GO:0016021;GO:0016021;GO:0034220;GO:0034765;GO:0071805;	K04999	-	P	1ATY3;1CTZA;12P9R;09TF4;0DJ7E;KOG3827;0UPHI;0V8SK	potassium inwardly rectifying channel subfamily J member 5 [Source:HGNC Symbol;Acc:HGNC:6266]	100352473	G1T9Q3
ENSOCUG00000024543	26.72642965	40.34921443	13.10364487	0.324755886	-1.622572422	0.017816776	0.746188907	13	42189836	42220164	+	399	H2BC18	GO:0000786;GO:0000786;GO:0000786;GO:0003677;GO:0003677;GO:0003677;GO:0005634;GO:0005654;GO:0005694;GO:0005829;GO:0046982;GO:0046982;	-	-	B	0DTRI;KOG1744;0A6S1;13R30;0VI9I;0UV3T;1B5P9;1D33H	H2B clustered histone 18 [Source:HGNC Symbol;Acc:HGNC:24700]	-	-
ENSOCUG00000003246	2066.705959	1374.998371	2758.413546	2.006121318	1.004408854	0.017893905	0.746188907	3	85464890	85615817	+	4378	SULF1	GO:0001502;GO:0001822;GO:0001937;GO:0001937;GO:0002063;GO:0003824;GO:0003824;GO:0004065;GO:0004065;GO:0005509;GO:0005509;GO:0005509;GO:0005615;GO:0005615;GO:0005783;GO:0005783;GO:0005783;GO:0005783;GO:0005794;GO:0005794;GO:0005794;GO:0005795;GO:0007155;GO:0008449;GO:0008449;GO:0008484;GO:0008484;GO:0009986;GO:0009986;GO:0009986;GO:0009986;GO:0014846;GO:0016525;GO:0016525;GO:0016787;GO:0030177;GO:…	K14607	EC:3.1.6.-	W;G	1CZT5;0A1BE;KOG3731;1B3Z4;0DJ9K;0VBNW;12QWY;0UMN1	sulfatase 1 [Source:HGNC Symbol;Acc:HGNC:20391]	100347304	-
ENSOCUG00000000853	230.1081809	164.9037932	295.3125686	1.790817317	0.840618174	0.017894604	0.746188907	19	19439619	19441844	+	995	TLCD1	GO:0016021;GO:0005886;GO:0007009;GO:0016020;GO:0016021;GO:0016021;GO:0016021;GO:0055091;GO:0071709;GO:0097035;	-	-	C;U	0UM86;KOG4474;09ZPX;0DIZF;13NDJ;1CW2X;1AU5Q;0VAKM	TLC domain containing 1 [Source:HGNC Symbol;Acc:HGNC:25177]	100345362	-
ENSOCUG00000029605	18.11391656	7.987242527	28.24059059	3.535712168	1.822000834	0.01790011	0.746188907	GL019656	25096	36751	+	1528	-	GO:0036094;GO:0036094;GO:0036094;GO:0036094;GO:0036094;	-	-	-	-	-	103347146	U3KNB5
ENSOCUG00000017106	837.0040486	626.6293008	1047.378796	1.671448806	0.741099168	0.018013367	0.749074203	GL018739	55399	134322	-	1659	-	-	-	-	T	0DF06;0V4NZ;1ARX6;1CPPY;09TPT;0UG45;12S94;KOG0249	-	-	-
ENSOCUG00000012928	317.1145921	234.7036934	399.5254909	1.70225481	0.76744701	0.018094119	0.750597021	12	35347263	35394251	+	1962	ENPP4	GO:0003824;GO:0003824;GO:0016020;GO:0016021;GO:0030194;GO:0030194;GO:0030194;GO:0046130;GO:0047710;GO:0047710;GO:0047710;	K18424	EC:3.6.1.29	F;S	0DJ56;1AXAG;12QQY;0V8QQ;0UMU7;1CTX1;KOG2645;09XT3	ectonucleotide pyrophosphatase/phosphodiesterase 4 [Source:HGNC Symbol;Acc:HGNC:3359]	100339399	-
ENSOCUG00000031535	26.40438784	13.87729684	38.93147885	2.805407948	1.488210575	0.018291067	0.755515824	GL019456	23269	39485	+	4007	-	GO:0007399;GO:0007399;GO:0007399;GO:0007399;	-	-	-	-	-	-	-
ENSOCUG00000013396	614.8824075	977.6202479	252.1445672	0.257916679	-1.955023025	0.018301536	0.755515824	12	6011333	6016458	+	1345	EDN1	GO:0000122;GO:0001501;GO:0001516;GO:0001569;GO:0001666;GO:0001701;GO:0003100;GO:0005102;GO:0005125;GO:0005179;GO:0005576;GO:0005576;GO:0005576;GO:0005615;GO:0005615;GO:0005623;GO:0005737;GO:0006885;GO:0007166;GO:0007186;GO:0007193;GO:0007204;GO:0007205;GO:0007267;GO:0007507;GO:0007585;GO:0007589;GO:0008217;GO:0008284;GO:0008284;GO:0009953;GO:0010460;GO:0010613;GO:0010827;GO:0010870;GO:0014032;GO:…	K16366	-	T;W	0UM0E;0V842;13QFQ;0IWVG;09X5H;1AWGE;0DIGI;1CT73	Endothelin-1 Big endothelin-1 [Source:UniProtKB/Swiss-Prot;Acc:P29560]	100009270	P29560
ENSOCUG00000005279	167.7702906	216.9829384	118.5576428	0.546391544	-0.871992938	0.018387859	0.757241415	16	54746710	54835476	-	2459	TGFB2	GO:0000902;GO:0000902;GO:0001540;GO:0001540;GO:0001654;GO:0001654;GO:0001666;GO:0001837;GO:0001837;GO:0001942;GO:0001942;GO:0003007;GO:0003007;GO:0005102;GO:0005102;GO:0005114;GO:0005114;GO:0005160;GO:0005160;GO:0005160;GO:0005160;GO:0005576;GO:0005576;GO:0005576;GO:0005615;GO:0005615;GO:0005615;GO:0005615;GO:0005615;GO:0006468;GO:0006468;GO:0007050;GO:0007050;GO:0007179;GO:0007179;GO:0007435;GO:…	K13376	-	-	-	transforming growth factor beta 2 [Source:HGNC Symbol;Acc:HGNC:11768]	100009371	Q6T7C3
ENSOCUG00000014890	80.27676327	25.0402855	135.513241	5.411808945	2.436110908	0.018511582	0.760495127	4	82092334	82150306	-	2008	PAH	GO:0004497;GO:0004497;GO:0004505;GO:0004505;GO:0004505;GO:0004505;GO:0005506;GO:0005506;GO:0006559;GO:0006559;GO:0009072;GO:0009072;GO:0016714;GO:0016714;GO:0046872;GO:0055114;GO:0055114;GO:0004497;GO:0004505;GO:0005506;GO:0006559;GO:0009072;GO:0016714;GO:0055114;GO:0004497;GO:0004505;GO:0005506;GO:0006559;GO:0009072;GO:0016714;GO:0055114;	K00500	EC:1.14.16.1	E	12SID;0UR74;1AZCM;0DJJ7;0V93G;KOG3820;1CUBV;09V2Z	phenylalanine hydroxylase [Source:HGNC Symbol;Acc:HGNC:8582]	100354678	G1T8B6
ENSOCUG00000006524	167.7648539	218.3859597	117.143748	0.536406957	-0.898600148	0.018639249	0.763830079	17	31970237	31984345	+	555	BMF	GO:0006915;GO:0006915;GO:0010507;GO:0034644;GO:0043065;GO:0043276;	K17460	-	A;T;K	0IHFT;1CY47;1AXTF;12TST;0VCDV;0DP69;0UNA9;0A1I8	Bcl2 modifying factor [Source:HGNC Symbol;Acc:HGNC:24132]	100357766	G1SR62
ENSOCUG00000006543	7.989787644	2.19338586	13.78618943	6.285346177	2.651992206	0.018710451	0.763830079	GL018720	3438390	3518113	-	2270	FAM169A	-	-	-	S	09U7T;13NJB;0DFHH;0IK9K;1ASIG;0V56Y;0UGUX;1CQ7A	family with sequence similarity 169 member A [Source:HGNC Symbol;Acc:HGNC:29138]	100341125	-
ENSOCUG00000023923	350.3368819	238.6269418	462.046822	1.936272654	0.953282119	0.01872749	0.763830079	GL019053	28821	76717	-	1161	-	GO:0030073;GO:0042593;GO:0016020;GO:0016021;GO:0030073;GO:0030073;GO:0042593;GO:0042593;	-	-	U	13HT4;1B1CU;0VEKF;0USQ5;0DRCA;0IJKD;1CWBE;0A3RX	-	-	-
ENSOCUG00000000013	187.6185138	243.8575257	131.3795019	0.538755167	-0.892298295	0.018786835	0.764417454	GL018703	42530	277427	+	4626	RAD18	GO:0003677;GO:0003697;GO:0006281;GO:0006301;GO:0006513;GO:0061630;GO:0000403;GO:0003677;GO:0003697;GO:0005634;GO:0005654;GO:0005657;GO:0005813;GO:0006281;GO:0006301;GO:0006513;GO:0006974;GO:0016604;GO:0031593;GO:0031625;GO:0035861;GO:0042405;GO:0042802;GO:0044877;GO:0051865;GO:0051984;GO:0060548;GO:0061630;GO:0003677;GO:0003697;GO:0006281;GO:0006301;GO:0006513;GO:0061630;GO:0003677;GO:0003697;GO:…	K10627	EC:2.3.2.27	T;L	KOG3656;0V455;0DJ5R;09XTM;12QQR;1B31J;0UMUQ;1CTXN;12N3W;1CY31;0DP50;0A1H4;0UREE;KOG0287;1AWKQ;0VCCN	RAD18 E3 ubiquitin protein ligase [Source:HGNC Symbol;Acc:HGNC:18278]	100345274	G1SCE8
ENSOCUG00000005922	681.2618306	473.1355143	889.3881468	1.879774652	0.910559722	0.018994073	0.7693348	GL018717	1870124	1925811	-	3842	ASRGL1	GO:0004067;GO:0007165;GO:0016787;GO:0005496;GO:0005576;GO:0007165;GO:0007165;GO:0008289;GO:0019834;GO:0043086;GO:0004067;GO:0004067;GO:0005737;GO:0008798;GO:0016787;GO:0033345;GO:0004067;GO:0004067;GO:0016787;GO:0016787;	K13051	-	W;K;E	09WWW;KOG1592;1AZ2N;1CYTN;0VD1U;0UT86;131JB;0DMJG;13X5V;0UWU1;0DWD3;1B71C;1D5ND;0VMGB;0J459;0AAU1	Uteroglobin [Source:UniProtKB/Swiss- Prot;Acc:P02779]	100340867	-
ENSOCUG00000003918	171.8948561	121.3692636	222.4204486	1.832592882	0.873886321	0.018998155	0.7693348	1	14945898	14994023	+	5929	CORO2A	GO:0005515;GO:0017053;GO:0051015;GO:0005515;GO:0017053;GO:0017053;GO:0051015;GO:0005515;GO:0017053;GO:0017053;GO:0051015;GO:0051015;	K13887	-	Z	1AXMX;12NEF;0V4FS;09TGS;KOG0303;1CVDP;0UKA6;0DEVK	coronin 2A [Source:HGNC Symbol;Acc:HGNC:2255]	100356159	-
ENSOCUG00000010481	3522.259	2697.746173	4346.771826	1.611260492	0.688189753	0.019201553	0.7722121	10	45661933	45804236	-	5025	EGFR	GO:0000166;GO:0000902;GO:0001892;GO:0001934;GO:0001942;GO:0003682;GO:0004672;GO:0004672;GO:0004713;GO:0004713;GO:0004713;GO:0004713;GO:0004714;GO:0004714;GO:0004714;GO:0004888;GO:0005006;GO:0005006;GO:0005524;GO:0005524;GO:0005524;GO:0005634;GO:0005634;GO:0005737;GO:0005768;GO:0005886;GO:0005886;GO:0006468;GO:0006468;GO:0007165;GO:0007165;GO:0007166;GO:0007169;GO:0007169;GO:0007173;GO:0007173;GO:…	K04361	EC:2.7.10.1	T	12QPC;1AVZU;0V6WJ;09VY3;KOG1025;0DH6Q;1CRHP;0UHZK	epidermal growth factor receptor [Source:HGNC Symbol;Acc:HGNC:3236]	100008806	G1SZE4
ENSOCUG00000025655	79.84884758	107.0997017	52.59799347	0.491112418	-1.025874793	0.01923351	0.7722121	13	24893545	24946698	+	4288	GPR161	GO:0004930;GO:0007186;GO:0016021;GO:0004930;GO:0004930;GO:0004930;GO:0004930;GO:0005929;GO:0007165;GO:0007186;GO:0007186;GO:0007186;GO:0007189;GO:0016020;GO:0016021;GO:0016021;GO:0016021;GO:0055037;GO:1901621;GO:0004930;GO:0007186;GO:0016021;	K08439	-	T	KOG3656;1CYEV;12R8B;1B3Q0;0VCQ3;0A1UC;0US0H;0DG25	G protein-coupled receptor 161 [Source:HGNC Symbol;Acc:HGNC:23694]	100349764	-
ENSOCUG00000015142	227.1764166	161.216285	293.1365481	1.81828125	0.862575372	0.019243884	0.7722121	GL018715	3284687	3813338	+	1077	GMDS	GO:0008446;GO:0008446;GO:0008446;GO:0019673;GO:0019673;GO:0019673;GO:0042351;GO:0042802;GO:0070401;	-	-	G	KOG1372;12PAH;1CPXF;0V5R5;0UHMH;0DF7V;09URQ;1B2DU	GDP-mannose 4,6-dehydratase [Source:HGNC Symbol;Acc:HGNC:4369]	-	-
ENSOCUG00000009057	415.6072272	302.9857575	528.2286969	1.743410982	0.801912702	0.019256805	0.7722121	15	27157992	27170109	+	3435	PCDH18	GO:0007155;GO:0007399;GO:0005509;GO:0005509;GO:0005886;GO:0005886;GO:0007155;GO:0007155;GO:0007155;GO:0007156;GO:0007156;GO:0007399;GO:0007399;GO:0007420;GO:0016020;GO:0016020;GO:0016020;GO:0016021;	K16499	-	Z;U	09XNN;1AUA8;1CW7A;KOG3594;0URHE;0V8KB;0DJ0D;12TJ7	protocadherin 18 [Source:HGNC Symbol;Acc:HGNC:14268]	100350767	G1SWF7
ENSOCUG00000031605	442.3128118	809.85376	74.77186369	0.092327612	-3.437094018	0.019299381	0.7722121	3	149606118	149608946	+	2709	-	GO:0003700;GO:0006355;	-	-	-	-	-	-	-
ENSOCUG00000025901	9568.762097	6338.11462	12799.40957	2.019434854	1.013951606	0.019341625	0.7722121	GL018717	1780959	1788216	+	6673	-	-	-	-	S	0DJDH;0IGIF;12S0I;0V8Y1;0UHN6;1CU5S;09Y0D;1AT8Q	-	-	-
ENSOCUG00000013280	715.326038	536.3500014	894.3020745	1.667385237	0.737587467	0.019427342	0.773817869	9	23621853	23916688	-	2274	ARHGEF3	GO:0005085;GO:0005085;GO:0005085;GO:0005089;GO:0035023;GO:0035556;GO:0035556;GO:0005085;GO:0005089;GO:0035023;GO:0035556;GO:0005085;GO:0005089;GO:0035023;GO:0035556;GO:0005085;GO:0005089;GO:0035023;GO:0035556;	K20683	-	T	1CTBB;12R8C;0UM5G;KOG4305;1AWWS;09WAQ;0DHK3;0V78Y	Rho guanine nucleotide exchange factor 3 [Source:HGNC Symbol;Acc:HGNC:683]	100352585	-
ENSOCUG00000003866	2902.201159	1859.494019	3944.908298	2.121495557	1.085081657	0.019605299	0.779081621	17	23801096	24059362	+	9423	FBN1	GO:0001501;GO:0001527;GO:0001527;GO:0005178;GO:0005201;GO:0005509;GO:0005509;GO:0005509;GO:0005576;GO:0005604;GO:0005615;GO:0007507;GO:0008201;GO:0031012;GO:0033627;GO:0035582;GO:0035583;GO:0042802;GO:0043010;GO:0044877;GO:0045671;GO:0045671;GO:0048048;GO:0048050;GO:0062023;GO:2001205;GO:2001205;GO:0005509;GO:0005509;	K06825	-	T	1CQDZ;13HFH;0V4DH;0UH4J;09UEG;1B3RM;KOG4193;0DFQB	fibrillin 1 [Source:HGNC Symbol;Acc:HGNC:3603]	100350931	-
ENSOCUG00000009715	30.77430079	16.6235654	44.92503618	2.702491019	1.434289824	0.01965431	0.779208636	16	61257605	61269877	+	1915	NEK2	GO:0000070;GO:0000776;GO:0000794;GO:0000922;GO:0001824;GO:0004672;GO:0004672;GO:0004672;GO:0004672;GO:0005524;GO:0005524;GO:0005654;GO:0005813;GO:0006468;GO:0006468;GO:0006468;GO:0006468;GO:0007059;GO:0007059;GO:0019903;GO:0030496;GO:0032212;GO:0032991;GO:0043392;GO:0046602;GO:0046777;GO:0051299;GO:0051973;GO:0051988;GO:0090307;GO:1903126;GO:1904355;	K20872	EC:2.7.11.1	T;D;V	12NCB;0DIRA;KOG0591;0USUH;0A1UN;1CYF6;1B4E3;0V4R9	NIMA related kinase 2 [Source:HGNC Symbol;Acc:HGNC:7745]	100339755	G1SXR8
ENSOCUG00000007043	409.969225	302.8862341	517.0522159	1.707083907	0.771533972	0.019775913	0.782206363	21	14246621	14274558	+	1707	-	GO:0004672;GO:0005524;GO:0006468;	-	-	T;D	0DJDF;09UWW;0UFHM;1AXJT;0V5WQ;1CU5Q;12NZY;KOG0577	-	100349787	-
ENSOCUG00000007533	120.1399988	157.0727518	83.20724583	0.529736984	-0.916651859	0.019886291	0.784698491	16	51346179	51392526	+	1492	DUSP10	GO:0000188;GO:0002819;GO:0004725;GO:0004725;GO:0005634;GO:0005654;GO:0005737;GO:0005794;GO:0005829;GO:0006470;GO:0006470;GO:0006470;GO:0006470;GO:0008138;GO:0008138;GO:0008330;GO:0008432;GO:0010633;GO:0016311;GO:0016311;GO:0016311;GO:0016607;GO:0016787;GO:0016791;GO:0016791;GO:0016791;GO:0017017;GO:0017017;GO:0032496;GO:0032873;GO:0033549;GO:0033549;GO:0035970;GO:0043508;GO:0043508;GO:0044387;GO:…	K20216	-	V	12R2E;1CUIA;0DJR7;09YBG;0UNBC;0V991;KOG1716;1B431	dual specificity phosphatase 10 [Source:HGNC Symbol;Acc:HGNC:3065]	100352279	G1ST94
ENSOCUG00000010984	324.7550264	235.947352	413.5627008	1.752775343	0.809641095	0.019931194	0.784698491	12	22309189	22502541	-	3829	-	GO:0016020;GO:0016021;	K06751	-	-	-	-	100355380	-
ENSOCUG00000013806	1479.183808	1100.07417	1858.293445	1.689243777	0.75637754	0.020133278	0.790824005	13	54825373	54906715	+	2574	SORT1	GO:0000502;GO:0004175;GO:0004298;GO:0004298;GO:0005515;GO:0005634;GO:0005737;GO:0005764;GO:0005769;GO:0005794;GO:0005794;GO:0005829;GO:0005839;GO:0005886;GO:0005886;GO:0005905;GO:0006508;GO:0006511;GO:0006622;GO:0006895;GO:0006897;GO:0006897;GO:0007186;GO:0007218;GO:0008233;GO:0008333;GO:0008625;GO:0009986;GO:0010465;GO:0010468;GO:0014902;GO:0014902;GO:0016020;GO:0016021;GO:0016021;GO:0016021;GO:…	K02729	EC:3.4.25.1	U	0WDMY;0V1PU;14UE7;1DDCZ;0B13P;0ISX8;0E6EA;1BADI	sortilin 1 [Source:HGNC Symbol;Acc:HGNC:11186]	100338247	-
ENSOCUG00000016902	1009.990308	1261.821763	758.1588529	0.600844648	-0.734936074	0.020332296	0.793910762	6	27012763	27181342	+	7312	EPHB4	GO:0000166;GO:0004672;GO:0004672;GO:0004713;GO:0004713;GO:0004713;GO:0004714;GO:0005003;GO:0005003;GO:0005515;GO:0005524;GO:0005524;GO:0005524;GO:0005887;GO:0005887;GO:0006468;GO:0006468;GO:0007169;GO:0007169;GO:0016020;GO:0016021;GO:0016021;GO:0016021;GO:0016301;GO:0016310;GO:0016740;GO:0018108;GO:0048013;GO:0004672;GO:0004713;GO:0005003;GO:0005515;GO:0005524;GO:0005887;GO:0006468;GO:0007169;GO:…	K05113	EC:2.7.10.1	O;T;P	1CXWW;0DNX1;0A06Y;1ARMC;KOG2195;12TKD;0VC7D;0UP4W;0DEUZ;0V4H7;1ARHD;13HBX;0UFWT;KOG0196;1CPIQ;09TI9	EPH receptor B4 [Source:HGNC Symbol;Acc:HGNC:3395]	100359286	-
ENSOCUG00000027343	7.296200006	1.890066098	12.70233391	6.720576561	2.748585008	0.020451985	0.793910762	2	35975313	36000020	+	549	-	GO:0004888;GO:0004888;GO:0004890;GO:0005216;GO:0005216;GO:0005230;GO:0005886;GO:0006811;GO:0006811;GO:0006811;GO:0016020;GO:0016020;GO:0016021;GO:0016021;GO:0016021;GO:0034220;GO:0034220;	K05181	-	W;T	12PJU;1B46U;1CS2U;0V71Z;0UH5I;0DHCM;KOG3643;09W3H	-	100340127	-
ENSOCUG00000032962	112.9548668	155.8388356	70.07089805	0.449636946	-1.153167512	0.020552427	0.793910762	GL018786	780878	781290	-	288	-	-	-	-	-	-	-	-	-
ENSOCUG00000021704	275.0102776	202.299617	347.7209383	1.718841308	0.781436354	0.020555984	0.793910762	19	43397725	43405632	-	2145	PLEKHH3	GO:0005856;GO:0005856;GO:0007165;GO:0007165;	-	-	T;N	0ITZM;0UIGJ;0V499;13U9Q;1B2UZ;0DHV0;1CSJR;09WJR	pleckstrin homology, MyTH4 and FERM domain containing H3 [Source:HGNC Symbol;Acc:HGNC:26105]	108175364	-
ENSOCUG00000017727	395.9736483	497.7060591	294.2412376	0.591194807	-0.758294498	0.020558571	0.793910762	GL018705	5902129	5934497	-	1979	NEK3	GO:0004672;GO:0004672;GO:0005524;GO:0005524;GO:0006468;GO:0006468;GO:0006468;GO:0030010;GO:0048812;GO:0090043;	K20873	EC:2.7.11.1	T	12PVM;0DKQI;KOG0589;09VWD;0V4YN;0UJ4G;1D04T;1B376	NIMA related kinase 3 [Source:HGNC Symbol;Acc:HGNC:7746]	100345376	G1TEA9
ENSOCUG00000012155	34036.47271	13366.19863	54706.7468	4.09291739	2.033129548	0.020558655	0.793910762	11	16063286	16105692	-	2256	PCSK1	GO:0004175;GO:0004252;GO:0004252;GO:0004252;GO:0005615;GO:0005615;GO:0006508;GO:0006508;GO:0016485;GO:0016486;GO:0042802;GO:0043043;	K01359	EC:3.4.21.93	O	1CPJS;0UFY8;KOG3525;09T8R;12PQZ;1ARZX;0V47P;0DEW6	proprotein convertase subtilisin/kexin type 1 [Source:HGNC Symbol;Acc:HGNC:8743]	100345424	-
ENSOCUG00000027275	3471.536107	2659.130326	4283.941887	1.611031187	0.687984423	0.020595921	0.793910762	14	43148898	43193421	-	1281	TM4SF1	GO:0016021;GO:0005887;GO:0016020;GO:0016021;GO:0016021;GO:0016021;GO:0016021;GO:0016021;	-	-	U	1CPRG;0UG67;0DF1P;0IE1N;0V4QN;09TRB;1AWS7;12NBY	transmembrane 4 L six family member 1 [Source:HGNC Symbol;Acc:HGNC:11853]	100342645	-
ENSOCUG00000037306	21.1879944	9.924663237	32.45132557	3.269765915	1.709187356	0.020619595	0.793910762	14	20339780	20340562	-	669	-	GO:0005509;	-	-	-	-	-	-	-
ENSOCUG00000012022	400.9657209	299.9112784	502.0201634	1.67389558	0.743209533	0.020631971	0.793910762	9	36370597	36407895	-	1657	EOGT	GO:0006493;GO:0016262;GO:0016757;GO:0016757;GO:0016757;	K18134	EC:2.4.1.255	S;O;K	0UMSP;1CTVK;12QPV;0V8PD;1B53W;09XRN;0DJ3R;KOG4698	EGF domain specific O-linked N-acetylglucosamine transferase [Source:HGNC Symbol;Acc:HGNC:28526]	100342123	G1T2G5
ENSOCUG00000007950	182.4944899	127.9687327	237.0202471	1.852173121	0.889218952	0.020720777	0.794789255	2	5506365	5574118	+	2432	CPEB2	GO:0003676;GO:0003730;GO:0005634;GO:0005737;GO:0006417;GO:0032869;GO:0045182;GO:0071456;GO:2000766;GO:0003676;GO:0003730;GO:0006417;GO:0045182;GO:0003676;GO:0003676;GO:0003723;GO:0003730;GO:0003730;GO:0006417;GO:0006417;GO:0045182;GO:0045182;GO:0003676;GO:0003676;GO:0003723;GO:0003730;GO:0003730;GO:0006417;GO:0006417;GO:0045182;GO:0045182;GO:0003676;GO:0003730;GO:0006417;GO:0045182;	K02602	-	J	1AYPU;12RYW;09UGD;1CQFN;0DFS4;KOG0129;0V5FQ;0UNPA	cytoplasmic polyadenylation element binding protein 2 [Source:HGNC Symbol;Acc:HGNC:21745]	100351062	-
ENSOCUG00000009705	103.4060327	136.5662789	70.24578644	0.514371388	-0.9591177	0.020785039	0.794789255	19	29943034	29967901	+	6776	TSPOAP1	GO:0005515;GO:0005737;GO:0005739;GO:0030156;GO:0044305;GO:0098978;GO:0099509;GO:0099626;GO:0005515;	K19922	-	Z;T	1B34H;1CYI2;0DPJA;0A1X7;0USX2;KOG3632;0VAXA;12P63	TSPO associated protein 1 [Source:HGNC Symbol;Acc:HGNC:16831]	100355325	-
ENSOCUG00000016657	394.6489719	498.3527883	290.9451555	0.58381364	-0.776420176	0.020794992	0.794789255	14	65759027	65790034	-	1205	-	GO:0003735;GO:0003735;GO:0005840;GO:0005840;GO:0006412;GO:0006412;GO:0003723;GO:0003746;GO:0043022;GO:0045901;GO:0045905;GO:0003723;GO:0003746;GO:0043022;GO:0045901;GO:0045905;GO:0003723;GO:0003746;GO:0043022;GO:0045901;GO:0045905;GO:0003723;GO:0003723;GO:0003746;GO:0003746;GO:0003746;GO:0006412;GO:0006452;GO:0006452;GO:0006452;GO:0043022;GO:0043022;GO:0043022;GO:0045901;GO:0045901;GO:0045901;GO:…	K03263	-	J	0USCH;0DQXD;0VFAJ;1D01C;1B3TU;13PPF;KOG3271;0A4M4;1D3JV;0A7EY;KOG3434;1B5WN;0VI9F;0DU7V;13UU4;0UVM2	-	100355062	G1TC37
ENSOCUG00000024479	643.8640237	1048.560445	239.1676019	0.228091383	-2.132316152	0.021086492	0.804123431	16	7439690	7480120	-	1225	-	GO:0003735;GO:0003735;GO:0005840;GO:0005840;GO:0005840;GO:0006412;GO:0006412;GO:0003735;GO:0005840;GO:0006412;	K02877	-	J	KOG1678	-	100358370	G1T0C1;G1TII0
ENSOCUG00000010649	14.04508123	22.47733513	5.612827336	0.249710533	-2.001671418	0.021137917	0.80428118	16	6803306	6881114	-	1898	MKX	GO:0003677;GO:0003677;GO:0003677;GO:0005634;GO:0006355;GO:0006355;GO:0043565;GO:0043565;	-	-	-	-	mohawk homeobox [Source:HGNC Symbol;Acc:HGNC:23729]	100357336	G1SZQ8
ENSOCUG00000011603	151.9234947	196.4477769	107.3992124	0.546706173	-0.871162428	0.021205463	0.805050252	GL018737	764211	767354	+	2259	MEX3B	GO:0003676;GO:0003676;GO:0003723;GO:0003723;GO:0005654;GO:0005829;	-	-	-	-	mex-3 RNA binding family member B [Source:HGNC Symbol;Acc:HGNC:25297]	-	-
ENSOCUG00000022068	14.70108855	6.18372193	23.21845518	3.754770257	1.908724636	0.021281823	0.806149778	8	1467912	1476758	+	630	-	GO:0003677;GO:0003677;GO:0003677;GO:0005634;GO:0006355;GO:0006355;GO:0043565;GO:0043565;	-	-	K	1CZ7N;0A3SY;KOG0488;13IPG;0USJF;0DQ6E;1AVC5;0VEMG	-	103348981	-
ENSOCUG00000002105	853.203746	647.9445854	1058.462907	1.633570109	0.708028373	0.021374036	0.806681885	15	66679131	66870979	+	3905	AFF1	GO:0008023;	K15184	-	K	1AUUS;1CPFG;0V6ID;13I7E;09VJ9;0IGJB;0UKUW;0DERP	AF4/FMR2 family member 1 [Source:HGNC Symbol;Acc:HGNC:7135]	100352431	-
ENSOCUG00000026640	221.8770016	281.4276975	162.3263058	0.576795771	-0.793867508	0.021398228	0.806681885	1	121624473	121710677	+	3411	SESN3	GO:0005634;GO:0005737;GO:0031932;GO:0032868;GO:0034198;GO:0038203;GO:0042149;GO:0042593;GO:0046626;GO:0051896;GO:0061700;GO:0071230;GO:1901031;GO:1904262;GO:0005634;GO:0005634;GO:1901031;GO:1901031;GO:0005634;GO:1901031;GO:0005634;GO:1901031;	K10141	-	S;J	KOG3746;1B44J;09WFN;0V7E5;0DH5Z;0URSY;12PWZ;1CUY2	sestrin 3 [Source:HGNC Symbol;Acc:HGNC:23060]	100354919	G1U329
ENSOCUG00000000117	108.3845278	170.7697758	45.99927986	0.269364293	-1.892369477	0.021540594	0.806681885	7	169148622	169162942	-	735	TM4SF20	GO:0005789;GO:0005886;GO:0005925;GO:0016020;GO:0016021;GO:0016021;GO:0016021;GO:0045861;	-	-	U	0IH9I;0V94X;1AXWC;1CUDP;0UNCS;13MFI;09Y7D;0DJKV	transmembrane 4 L six family member 20 [Source:HGNC Symbol;Acc:HGNC:26230]	-	-
ENSOCUG00000008344	586.6988593	436.6656211	736.7320975	1.687176782	0.754611147	0.021552606	0.806681885	8	13154733	13189891	+	2402	TM7SF3	GO:0005886;GO:0016020;GO:0016021;GO:0032024;GO:0034620;GO:0043069;	-	-	-	-	transmembrane 7 superfamily member 3 [Source:HGNC Symbol;Acc:HGNC:23049]	100345163	-
ENSOCUG00000009180	846.8924469	1074.092994	619.6918997	0.576944364	-0.793495891	0.021592389	0.806681885	3	118712031	118745796	+	2374	FZD6	GO:0004888;GO:0005515;GO:0007166;GO:0016020;GO:0016021;GO:0016055;GO:0042813;GO:0001736;GO:0001843;GO:0001942;GO:0004888;GO:0004888;GO:0005515;GO:0005789;GO:0005886;GO:0005886;GO:0007166;GO:0007166;GO:0007275;GO:0016020;GO:0016020;GO:0016020;GO:0016021;GO:0016021;GO:0016021;GO:0016055;GO:0016055;GO:0016055;GO:0016327;GO:0017147;GO:0030168;GO:0030901;GO:0031625;GO:0033278;GO:0035567;GO:0035880;GO:…	K02376	-	T	1AUBZ;0UIV3;0V4SV;12NRT;1D00P;0DNG2;KOG3577;09TTI	frizzled class receptor 6 [Source:HGNC Symbol;Acc:HGNC:4044]	100344394	G1SWP7
ENSOCUG00000003145	194.4429524	249.4826374	139.4032674	0.558769415	-0.839675039	0.02167924	0.806681885	GL018892	27154	35606	+	942	UNG	GO:0003684;GO:0004844;GO:0004844;GO:0004844;GO:0004844;GO:0005634;GO:0005634;GO:0005739;GO:0005739;GO:0006281;GO:0006281;GO:0006281;GO:0006284;GO:0006284;GO:0006284;GO:0006974;GO:0016446;GO:0016447;GO:0016787;GO:0016799;GO:0016799;GO:0043024;GO:0045190;GO:0097510;	K03648	EC:3.2.2.27	L	KOG2994;09XUJ;1AW78;12SBS;0DJ70;0UQJZ;1CTYX;0V8S9	uracil DNA glycosylase [Source:HGNC Symbol;Acc:HGNC:12572]	100338366	G1SJ42
ENSOCUG00000004827	266.8070712	196.6842623	336.92988	1.713049514	0.776566852	0.021693777	0.806681885	3	56275919	56316916	+	3304	SFXN1	GO:0005739;GO:0006811;GO:0006811;GO:0015075;GO:0015075;GO:0016020;GO:0016020;GO:0016020;GO:0016021;GO:0031966;GO:0034220;GO:0055085;GO:0055085;GO:0006811;GO:0015075;GO:0016020;GO:0055085;GO:0005739;GO:0005739;GO:0006730;GO:0006811;GO:0006826;GO:0015075;GO:0015194;GO:0015825;GO:0016020;GO:0030218;GO:0031305;GO:0042942;GO:0042945;GO:0055085;GO:0140300;GO:0006811;GO:0015075;GO:0016020;GO:0055085;GO:…	K23500	-	T;P;U	09Y92;0UGNF;0DKPE;KOG3767;0V96J;1ASD8;1CVHZ;12N5E	sideroflexin 1 [Source:HGNC Symbol;Acc:HGNC:16085]	100344214	G1SML5
ENSOCUG00000027476	306.8710834	223.9997968	389.74237	1.739922873	0.799023356	0.021718144	0.806681885	X	34638614	34644879	+	2187	TSPYL2	GO:0005634;GO:0005634;GO:0005634;GO:0005730;GO:0006334;GO:0006334;GO:0008156;GO:0030308;GO:0045859;	K11285	-	K;L	1CTAF;0DIJS;1AVI4;KOG1508;0A05Y;0V85E;13PP4;0UIAR	TSPY like 2 [Source:HGNC Symbol;Acc:HGNC:24358]	100341465	G1TJ35
ENSOCUG00000001465	339.6027409	181.1710345	498.0344474	2.748973911	1.458893215	0.021722737	0.806681885	GL018699	11190926	11452641	-	5497	PAPPA	GO:0004175;GO:0004222;GO:0004222;GO:0005576;GO:0006508;GO:0006508;GO:0008237;GO:0008237;GO:0008237;	-	-	W	0KDUG;1BAAP;0WJDH;13GHG;0E9P1;0B6NB;1DGHK;0V1J7	pappalysin 1 [Source:HGNC Symbol;Acc:HGNC:8602]	100354636	-
ENSOCUG00000023791	19.71339594	9.641061908	29.78572998	3.08946569	1.627357352	0.021956095	0.81162248	19	43408194	43410093	-	1089	CCR10	GO:0004930;GO:0004930;GO:0004930;GO:0004950;GO:0005623;GO:0005783;GO:0006935;GO:0006935;GO:0006935;GO:0006955;GO:0006955;GO:0007165;GO:0007186;GO:0007186;GO:0007186;GO:0007204;GO:0009986;GO:0016020;GO:0016021;GO:0016021;GO:0016021;GO:0016493;GO:0016493;GO:0016493;GO:0070098;	-	-	T	1ATYS;13PRI;0V97Z;09YAI;0UFW0;1CUGX;0DJPZ;0IW0E	C-C motif chemokine receptor 10 [Source:HGNC Symbol;Acc:HGNC:4474]	-	-
ENSOCUG00000028124	539.6178504	677.0259631	402.2097377	0.594083181	-0.75126315	0.021994973	0.81162248	4	55698757	55700386	-	1151	-	GO:0003676;GO:0003676;GO:0003723;	-	-	-	-	-	-	-
ENSOCUG00000011330	319.9489231	404.9112094	234.9866369	0.58034115	-0.785026866	0.022015258	0.81162248	10	11458041	11637898	-	2891	SKAP2	GO:0005515;GO:0005654;GO:0005737;GO:0005829;GO:0005886;GO:0008285;GO:0005515;	K23471	-	T	1CVES;1ATHK;13J7I;0IH8Q;0VCUR;0UHBP;0DKKB;0A1ZI	src kinase associated phosphoprotein 2 [Source:HGNC Symbol;Acc:HGNC:15687]	100342887	G1T138
ENSOCUG00000022267	1423.28213	1767.820153	1078.744106	0.610211454	-0.712618835	0.02204666	0.81162248	12	20542283	20545333	-	1283	DDAH2	GO:0000052;GO:0006527;GO:0016403;GO:0045429;GO:0000052;GO:0000052;GO:0000052;GO:0005829;GO:0006527;GO:0006527;GO:0016403;GO:0016403;GO:0016403;GO:0034451;GO:0045429;GO:0045429;	K01482	EC:3.5.3.18	O	0UMTA;0ISNS;0V84Y;09X6F;0DIHP;1CT83;1B47C;13NBQ	dimethylarginine dimethylaminohydrolase 2 [Source:HGNC Symbol;Acc:HGNC:2716]	100352259	-
ENSOCUG00000029637	831.3793246	1174.905482	487.8531668	0.415227586	-1.268025802	0.022178921	0.813805743	GL018777	1134683	1147673	+	2159	-	GO:0001730;GO:0003723;GO:0003723;GO:0003725;GO:0003725;GO:0003725;GO:0005515;GO:0005524;GO:0005524;GO:0006164;GO:0006955;GO:0006955;GO:0016740;GO:0016740;GO:0016779;GO:0016779;GO:0051607;GO:0051607;	K14608	-	-	-	-	100353732	U3KNX4
ENSOCUG00000029096	193425.9476	149451.1717	237400.7236	1.588483522	0.667650125	0.022241712	0.813805743	MT	5354	6895	+	1542	COX1	GO:0004129;GO:0004129;GO:0004129;GO:0004129;GO:0004129;GO:0005739;GO:0005739;GO:0005743;GO:0005743;GO:0005750;GO:0005751;GO:0005751;GO:0006119;GO:0009060;GO:0009060;GO:0016020;GO:0016021;GO:0016021;GO:0016021;GO:0016491;GO:0020037;GO:0020037;GO:0022900;GO:0045277;GO:0045277;GO:0045277;GO:0045277;GO:0046872;GO:0055114;GO:0055114;GO:0055114;GO:0070469;GO:1902600;	-	-	C	13HZ5;1AWXX;KOG4769;0VFUZ;1D1QB;0A46J;0UTKN;0DSEN	cytochrome c oxidase subunit I [Source:NCBI gene;Acc:808231]	-	-
ENSOCUG00000000255	538.0476386	398.7030161	677.392261	1.698989558	0.764676985	0.02224951	0.813805743	X	111212369	111369675	-	3697	ARHGEF6	GO:0005085;GO:0005089;GO:0005515;GO:0035023;GO:0035556;GO:0005085;GO:0005085;GO:0005085;GO:0005089;GO:0005515;GO:0035023;GO:0035556;GO:0035556;	K05729	-	-	-	Rac/Cdc42 guanine nucleotide exchange factor 6 [Source:HGNC Symbol;Acc:HGNC:685]	100358647	G1SCX4
ENSOCUG00000007495	166394.3947	213391.3153	119397.4741	0.559523586	-0.837729146	0.022424072	0.818430525	17	41182928	41183371	-	444	RNASE1	GO:0003676;GO:0003676;GO:0004518;GO:0004519;GO:0004540;GO:0016787;GO:0090501;	K01168	EC:4.6.1.18	G	0A7M3;13RRQ;1B5VU;0IYEN;1D3R3;0VIFH;0UVDH;0DUDF	ribonuclease A family member 1, pancreatic [Source:HGNC Symbol;Acc:HGNC:10044]	100351089	G1ST65
ENSOCUG00000008981	1130.969802	1401.585117	860.3544882	0.61384391	-0.704056245	0.022815066	0.830917855	19	41732410	41751027	-	1367	SMARCE1	GO:0016514;GO:0043044;GO:0003677;GO:0005634;GO:0005634;GO:0005654;GO:0006337;GO:0006338;GO:0008080;GO:0016514;GO:0016514;GO:0016514;GO:0016922;GO:0043044;GO:0043044;GO:0045892;GO:0047485;GO:0016514;GO:0043044;GO:0016514;GO:0043044;GO:0016514;GO:0043044;	K11651	-	B	0UJ9Q;12N4U;1B467;KOG4715;0DH7M;0V49I;1CRXT;09TAE	SWI/SNF related, matrix associated, actin dependent regulator of chromatin, subfamily e, member 1 [Source:HGNC Symbol;Acc:HGNC:11109]	100338684	-
ENSOCUG00000023463	135.6306945	91.89003761	179.3713515	1.952021744	0.964969123	0.022985444	0.831926192	7	39519019	39562033	-	1672	NAPEPLD	GO:0001659;GO:0005794;GO:0005829;GO:0008270;GO:0008270;GO:0008270;GO:0042802;GO:0048874;GO:0050729;GO:0070290;GO:0070290;GO:0070290;GO:0070290;GO:0070291;GO:0070292;GO:0070292;GO:0090336;	K13985	EC:3.1.4.54	S;I;L	1ASZD;09Z7F;0DKPG;0VA4P;12U25;KOG3798;1CVI1;0UPPQ	N-acyl phosphatidylethanolamine phospholipase D [Source:HGNC Symbol;Acc:HGNC:21683]	100352578	G1TV42
ENSOCUG00000015736	612.2309972	458.3238107	766.1381838	1.67160895	0.741237388	0.023014494	0.831926192	9	103052234	103279661	+	5299	PHLPP1	GO:0003824;GO:0003824;GO:0005515;GO:0002667;GO:0003824;GO:0005515;GO:0009649;GO:0042981;GO:0043408;GO:0046328;GO:0051898;GO:1900744;GO:0003824;GO:0005515;GO:0003824;GO:0005515;GO:0003824;GO:0005515;	K16340	EC:3.1.3.16	T	0USCI;12PJQ;KOG0619;0VA38;1AVQJ;0DINI;09Z5X;1CTDD	PH domain and leucine rich repeat protein phosphatase 1 [Source:HGNC Symbol;Acc:HGNC:20610]	100359297	-
ENSOCUG00000011525	2001.654191	1517.294717	2486.013665	1.638451408	0.712332887	0.02305458	0.831926192	GL018787	1065007	1108302	-	5924	PPL	GO:0005856;GO:0005856;GO:0009612;	K10386	-	Z	0B059;0V135;14TAM;0WCMT;0E5MN;0KD4E;1DCMJ	periplakin [Source:HGNC Symbol;Acc:HGNC:9273]	100343940	-
ENSOCUG00000002368	930.0590906	696.0422744	1164.075907	1.672421273	0.7419383	0.023060422	0.831926192	2	100693176	100728641	+	2680	GGCX	GO:0008488;GO:0008488;GO:0016020;GO:0016021;GO:0017187;GO:0017187;GO:0008488;GO:0017187;	K10106	EC:4.1.1.90	S;O	1CY4K;0UKW7;1AUQZ;0VCE4;0DP6N;0A1IM;0IHG2;12QHC	gamma-glutamyl carboxylase [Source:HGNC Symbol;Acc:HGNC:4247]	100346091	G1SHE2
ENSOCUG00000010261	2740.947042	3380.131204	2101.76288	0.621799201	-0.685479333	0.023087321	0.831926192	1	173925786	173955723	+	1076	EHF	GO:0003677;GO:0003700;GO:0003700;GO:0005634;GO:0005634;GO:0005634;GO:0006355;GO:0006355;GO:0006366;GO:0006366;GO:0030855;GO:0030855;GO:0043565;GO:0043565;GO:0050673;GO:0050673;GO:0000978;GO:0001228;GO:0003677;GO:0003700;GO:0003700;GO:0005634;GO:0005654;GO:0005794;GO:0006355;GO:0006366;GO:0030855;GO:0030855;GO:0043565;GO:0045893;GO:0045944;GO:0050673;GO:0003700;GO:0005634;GO:0006355;GO:0006366;GO:…	K17102	-	K	0UGBU;12NE5;KOG3804;0DF5V;0V4UN;1AWV3;09TVE;1CPVH	ETS homologous factor [Source:HGNC Symbol;Acc:HGNC:3246]	100341406	-
ENSOCUG00000006987	13.85924492	21.92420645	5.794283377	0.264287029	-1.919822477	0.023194165	0.832284527	2	93056737	93192891	+	2988	TSGA10	GO:0005737;GO:0007283;GO:0030031;GO:0031514;GO:0035686;GO:0043005;GO:0097228;GO:0007283;GO:0007283;GO:0007283;GO:0007283;GO:0007283;GO:0007283;GO:0007283;	-	-	-	-	testis specific 10 [Source:HGNC Symbol;Acc:HGNC:14927]	100348551	-
ENSOCUG00000006223	4821.448795	5897.712817	3745.184772	0.635023252	-0.655118676	0.023238663	0.832284527	2	138958143	138973213	-	1201	EPCAM	GO:0001657;GO:0005886;GO:0005923;GO:0008284;GO:0009986;GO:0016020;GO:0016021;GO:0016323;GO:0016324;GO:0016328;GO:0023019;GO:0044877;GO:0045944;GO:0048863;GO:2000048;GO:2000648;	K06737	-	T	0DPIM;0A1WG;1CWPF;0US33;1ATB1;13HKF;0V7KZ;0IFI6	epithelial cell adhesion molecule [Source:HGNC Symbol;Acc:HGNC:11529]	100346092	G1SQK6
ENSOCUG00000007654	1366.903759	1689.923949	1043.883568	0.617710382	-0.694997517	0.02324407	0.832284527	GL018704	6109105	6140447	-	1528	KHDRBS1	GO:0000122;GO:0000381;GO:0003676;GO:0003676;GO:0003723;GO:0003723;GO:0003723;GO:0003723;GO:0005070;GO:0005070;GO:0005634;GO:0005634;GO:0005654;GO:0005737;GO:0007166;GO:0007166;GO:0008143;GO:0008266;GO:0009967;GO:0016020;GO:0019904;GO:0042802;GO:0045948;GO:0046831;GO:0046833;GO:0048024;GO:0051259;GO:0003723;	K13198	-	A;K	12T8P;0DFQ5;1CQDS;KOG1588;0V5DP;0UH49;09UEA;1ATDJ	KH RNA binding domain containing, signal transduction associated 1 [Source:HGNC Symbol;Acc:HGNC:18116]	100350854	G1STI3
ENSOCUG00000008655	85.40418246	37.84027414	132.9680908	3.51393043	1.813085629	0.023301222	0.83231047	2	158906057	158912834	-	4753	-	GO:0046983;GO:0046983;	-	-	K	KOG4029;1CXIE;0DNM5;1AU31;0A1TZ;0VCPP;13N7H;0URP8	-	100350725	G1SVL3
ENSOCUG00000035124	99.62997436	69.182612	130.0773367	1.880202741	0.910888235	0.023369644	0.83231047	GL019049	105058	112744	-	1164	-	GO:0004055;GO:0005524;GO:0006526;	-	-	-	-	-	-	-
ENSOCUG00000005430	3538.56774	4365.137057	2711.998424	0.621285973	-0.686670612	0.023391604	0.83231047	13	38806245	38813105	+	2376	ILF2	GO:0003677;GO:0003723;GO:0003723;GO:0003725;GO:0005524;GO:0005524;GO:0005634;GO:0005634;GO:0005654;GO:0005730;GO:0005730;GO:0006351;GO:0006955;GO:0006955;GO:0016740;GO:0016740;GO:0045893;GO:1990904;GO:0003723;GO:0005524;GO:0006955;GO:0016740;	K13089	-	K	09U74;1CQ6H;12NK0;0UGTT;KOG3793;1AX9A;0V568;0DFGT	interleukin enhancer binding factor 2 [Source:HGNC Symbol;Acc:HGNC:6037]	100344164	-
ENSOCUG00000005623	9.190551508	2.817665802	15.56343721	5.52352135	2.465588306	0.023472131	0.83343215	7	105663854	105768147	-	6221	SCN9A	GO:0001518;GO:0005216;GO:0005248;GO:0005248;GO:0005515;GO:0005887;GO:0006811;GO:0006814;GO:0006954;GO:0006954;GO:0009636;GO:0009791;GO:0016020;GO:0019233;GO:0035725;GO:0048266;GO:0048266;GO:0055085;GO:0001518;GO:0001518;GO:0001518;GO:0005216;GO:0005216;GO:0005244;GO:0005248;GO:0005248;GO:0005272;GO:0005515;GO:0005886;GO:0006811;GO:0006811;GO:0006811;GO:0006814;GO:0006814;GO:0006814;GO:0006954;GO:…	K04841	-	P	14SZM;1B9UG;0WCBB;0E5CR;0V0VT;1DCCT;0AZUX;0KCTY	sodium voltage-gated channel alpha subunit 9 [Source:HGNC Symbol;Acc:HGNC:10597]	100009210	Q28644
ENSOCUG00000013696	1261.528972	951.2606947	1571.79725	1.652330701	0.724502459	0.023578375	0.83546042	18	27286166	27681417	-	5741	BICC1	GO:0003676;GO:0003723;GO:0005515;GO:0007368;GO:0007507;GO:0090090;GO:0003676;GO:0003723;GO:0005515;GO:0003676;GO:0003676;GO:0003723;GO:0003723;GO:0005515;GO:0003676;GO:0003723;GO:0005515;GO:0003676;GO:0003723;GO:0005515;GO:0003676;GO:0003723;GO:0005515;GO:0003676;GO:0003723;GO:0005515;GO:0003676;GO:0003723;GO:0005515;	K18756	-	A;T;I	09ZM5;KOG4374;0UQWI;KOG2208;12S40;0V4BQ;1AX9Q;1CXHE;0DK0F	BicC family RNA binding protein 1 [Source:HGNC Symbol;Acc:HGNC:19351]	100354974	-
ENSOCUG00000005008	6633.43414	5143.565302	8123.302977	1.579313667	0.659297733	0.023691894	0.835847376	2	131497504	131682800	-	7797	SPTBN1	GO:0000281;GO:0003779;GO:0005200;GO:0005200;GO:0005515;GO:0005543;GO:0005634;GO:0005730;GO:0005737;GO:0005886;GO:0007009;GO:0007182;GO:0008091;GO:0014069;GO:0016020;GO:0030506;GO:0030673;GO:0030863;GO:0031430;GO:0032437;GO:0043001;GO:0051020;GO:0060390;GO:0071709;GO:0072659;GO:1900042;GO:1903076;GO:1903078;GO:0003779;GO:0003779;GO:0003779;GO:0005200;GO:0005200;GO:0005200;GO:0005515;GO:0005543;GO:…	K06115	-	Z	0V45E;0DNXY;1CWUJ;0UST8;12N2S;09T6P;KOG0517;1AXNQ	spectrin beta, non-erythrocytic 1 [Source:HGNC Symbol;Acc:HGNC:11275]	100338720	-
ENSOCUG00000015214	119.934856	77.61098446	162.2587275	2.090667044	1.063963319	0.023728859	0.835847376	19	43318728	43322260	-	1476	PSMC3IP	GO:0005654;GO:0007131;GO:0007131;GO:0030374;GO:1903508;	K06695	-	T;K	0UI6M;0V658;0DGEP;KOG4603;1ATRS;09V5P;1CR47;12RWN	PSMC3 interacting protein [Source:HGNC Symbol;Acc:HGNC:17928]	100344940	G1T8Z2
ENSOCUG00000014795	4449.218325	3425.90281	5472.533839	1.597399034	0.675724746	0.023752476	0.835847376	GL018753	1410896	1661832	+	6224	IGF1R	GO:0000166;GO:0004672;GO:0004672;GO:0004713;GO:0004713;GO:0004713;GO:0004714;GO:0004714;GO:0004714;GO:0005515;GO:0005520;GO:0005524;GO:0005524;GO:0005524;GO:0005886;GO:0006468;GO:0006468;GO:0007169;GO:0007169;GO:0016020;GO:0016020;GO:0016020;GO:0016021;GO:0016021;GO:0016021;GO:0016301;GO:0016310;GO:0016740;GO:0018108;GO:0043548;GO:0043548;GO:0043560;GO:0043560;GO:0046777;GO:0046777;GO:0000166;GO:…	K05087	EC:2.7.10.1	T	12N8V;0V4I4;1CPJE;1AY56;0UFXU;KOG4258;09TJ5;0DEVU	insulin like growth factor 1 receptor [Source:HGNC Symbol;Acc:HGNC:5465]	100144342	-
ENSOCUG00000011578	1440.89404	1102.568568	1779.219512	1.613704184	0.690376136	0.023785873	0.835847376	15	71474550	71621323	-	3579	BMP2K	GO:0004672;GO:0004672;GO:0004672;GO:0005524;GO:0005524;GO:0005634;GO:0006468;GO:0006468;GO:0016607;GO:0019208;GO:0030500;GO:0050790;GO:0004672;GO:0005524;GO:0006468;	K08854	EC:2.7.11.1	T	12RV8;09UJM;0DFV7;1AVIS;0UMM5;0VBC1;KOG1989;1CQIK	BMP2 inducible kinase [Source:HGNC Symbol;Acc:HGNC:18041]	100357924	G1T1J9
ENSOCUG00000007575	94.7746535	125.6925433	63.85676374	0.508039396	-0.97698772	0.023920407	0.837718393	1	133829734	133861322	-	3402	DDIAS	GO:0097752;GO:1902230;	-	-	S	09ZXA;0UQNM;0V8B8;1B1QB;0DFF1;1CWB8;0IGF0;12SD9	DNA damage induced apoptosis suppressor [Source:HGNC Symbol;Acc:HGNC:26351]	100342259	U3KN96
ENSOCUG00000004438	55.02067453	35.86117038	74.18017869	2.068537583	1.04861117	0.024008776	0.837718393	GL018723	2558072	2559873	+	762	-	GO:0005856;GO:0005856;GO:0005856;GO:0008017;GO:0008017;GO:0008093;GO:0008093;	-	-	Z	0DQF4;0VDNM;1B23A;12QBS;0UTPN;0A2T2;KOG0516;1CZH4	-	-	-
ENSOCUG00000002341	1668.832164	1267.293949	2070.370379	1.633693888	0.708137685	0.024061444	0.837718393	2	100838720	100939407	+	1742	CAPG	GO:0051015;GO:0051016;GO:0051015;GO:0051015;GO:0051016;GO:0051016;GO:0005634;GO:0005654;GO:0005730;GO:0005737;GO:0005814;GO:0019904;GO:0044877;GO:0051015;GO:0051016;GO:0072686;GO:0090543;	K10368	-	Z	13HHD;KOG0443;1D0BW;0UU7U;0DR6G;0VEF2;1B2TK;0A3JT	capping actin protein, gelsolin like [Source:HGNC Symbol;Acc:HGNC:1474]	100347131	G1SHB9
ENSOCUG00000009030	42.24988564	25.2213575	59.27841378	2.350326059	1.232860915	0.024065224	0.837718393	5	27546130	27627592	+	5818	PKD1L3	GO:0005509;GO:0005515;GO:0016020;GO:0005509;GO:0005515;GO:0005886;GO:0016020;GO:0050915;GO:0005515;GO:0016020;GO:0016021;	-	-	T;P	0DMPP;0UJSR;1AVJH;KOG3599;1CWJB;0VB0B;0A043;KOG3272;12RSY	polycystin 1 like 3, transient receptor potential channel interacting [Source:HGNC Symbol;Acc:HGNC:21716]	-	-
ENSOCUG00000010380	875.6158007	1090.006045	661.2255567	0.606625587	-0.721121744	0.024157412	0.837718393	13	27205010	27234877	+	2186	-	GO:0016491;GO:0016491;GO:0016491;GO:0016620;GO:0016620;GO:0055114;GO:0055114;GO:0055114;GO:0016491;GO:0016620;GO:0055114;GO:0016491;GO:0016620;GO:0055114;	K00149	-	C	0US1U;1AYG0;09UKB;12PP4;1CQJC;0DFW0;0V5JN;KOG2450	-	100354540	-
ENSOCUG00000004160	367.6451573	237.4631898	497.8271249	2.096439138	1.067940948	0.024175572	0.837718393	9	25321769	25374663	-	1235	FAM107A	GO:0001558;GO:0001725;GO:0005634;GO:0005737;GO:0005925;GO:0015629;GO:0015629;GO:0016607;GO:0030041;GO:0030335;GO:0031398;GO:0031647;GO:0031669;GO:0032587;GO:0032956;GO:0043005;GO:0045202;GO:0050890;GO:0051017;GO:0051895;GO:0070507;GO:0071385;GO:1900272;GO:2000134;	-	-	S	0IX5W;0VHGI;0DTN4;13RK5;1B5IV;0UUZG;0A6NF;1D2ZP	family with sequence similarity 107 member A [Source:HGNC Symbol;Acc:HGNC:30827]	100354864	-
ENSOCUG00000006896	276.2305016	347.9765515	204.4844518	0.587638595	-0.766998942	0.024295934	0.837718393	18	38875579	38902709	+	954	RPP30	GO:0000172;GO:0001682;GO:0003824;GO:0003824;GO:0004526;GO:0004540;GO:0004540;GO:0008033;GO:0008033;GO:0030681;GO:0033204;GO:0090501;GO:0090502;	K03539	EC:3.1.26.5	A;J	09U7I;12REZ;0DFH9;1AU7V;0V56K;0UGUJ;KOG2363;1CQ70	ribonuclease P/MRP subunit p30 [Source:HGNC Symbol;Acc:HGNC:17688]	100340340	-
ENSOCUG00000017585	220.3827974	163.9747756	276.7908192	1.688008526	0.755322191	0.024310891	0.837718393	11	39410803	39439630	+	1266	OTULINL	GO:0005635;GO:0005737;GO:0016020;GO:0016021;GO:0042406;	-	-	S	0A1VM;0UQKV;0DPHS;1B0C8;0VCR7;0IK5W;1CYG9;137V4	OTU deubiquitinase with linear linkage specificity like [Source:HGNC Symbol;Acc:HGNC:25629]	100342296	-
ENSOCUG00000024002	86.78858317	114.3588852	59.21828112	0.517828422	-0.949453942	0.024358654	0.837718393	3	36354511	36354726	-	216	-	GO:0003735;GO:0003735;GO:0005840;GO:0005840;GO:0006412;GO:0006412;	-	-	J	KOG3411	-	-	-
ENSOCUG00000002435	60.81354024	39.95468863	81.67239185	2.04412535	1.031483668	0.024377646	0.837718393	GL019146	131310	137761	+	1006	-	GO:0005344;GO:0005506;GO:0005833;GO:0005833;GO:0015671;GO:0015671;GO:0015671;GO:0019825;GO:0019825;GO:0020037;GO:0020037;GO:0046872;GO:0005833;GO:0015671;GO:0019825;GO:0020037;	K13827	-	C	144HG;0VIQ4;0DUK3;0UVN4;KOG3378;1B5P0;1D3XM;0A7VD	-	100328803	B8K133;G1SHJ4
ENSOCUG00000003190	3088.183573	2331.789823	3844.577324	1.648766663	0.72138724	0.024380915	0.837718393	4	7615205	7665400	-	2496	HM13	GO:0004190;GO:0004190;GO:0006508;GO:0016020;GO:0016021;GO:0016021;GO:0016021;GO:0001701;GO:0004190;GO:0005783;GO:0005783;GO:0005789;GO:0005791;GO:0008233;GO:0016021;GO:0031625;GO:0033619;GO:0036513;GO:0042500;GO:0042803;GO:0071458;GO:0071556;GO:1904211;GO:0004190;GO:0016021;GO:0004190;GO:0016021;GO:0004190;GO:0004190;GO:0006508;GO:0016020;GO:0016021;GO:0016021;GO:0016021;	K09595	EC:3.4.23.-	K;U	0DIWN;09XJ6;0V8H9;1CTMZ;1B3CJ;KOG2443;13E6Q;0UMIU	histocompatibility minor 13 [Source:HGNC Symbol;Acc:HGNC:16435]	100348554	G1SJ74
ENSOCUG00000022432	1150.3126	878.3008515	1422.324349	1.619404498	0.69546339	0.024599101	0.843511121	GL018709	3414178	3509109	-	4450	MFHAS1	GO:0005515;GO:0005525;GO:0005737;GO:0006952;GO:0006954;GO:0006954;GO:0030218;GO:0031625;GO:0034121;GO:0034136;GO:0034136;GO:0034137;GO:0034137;GO:0034144;GO:0035308;GO:0043030;GO:0045087;GO:0045087;GO:0046330;GO:0050728;GO:0051721;GO:0051897;GO:0070374;GO:1900181;GO:1900745;	-	-	T	KOG0619;1B10I;0V8EN;1CTJG;12RDN;0DIU5;09XGK;0URVQ	malignant fibrous histiocytoma amplified sequence 1 [Source:HGNC Symbol;Acc:HGNC:16982]	100353570	G1U2C8
ENSOCUG00000015074	324.0044838	403.2399303	244.7690373	0.607005951	-0.720217435	0.024688044	0.844235033	4	17902461	17913140	+	1627	RBBP9	GO:0005654;GO:0016787;GO:0016787;	K07002	-	S	1CX4Q;1B1FU;0UQZC;0IK06;0A0KQ;0DN82;13MI7;0VBGX	RB binding protein 9, serine hydrolase [Source:HGNC Symbol;Acc:HGNC:9892]	100346098	G1T8N7
ENSOCUG00000008667	158.7832763	202.7131233	114.8534292	0.566581124	-0.819645557	0.024719488	0.844235033	9	61683917	61695471	-	933	-	GO:0004799;GO:0004799;GO:0006231;GO:0006231;GO:0004799;GO:0004799;GO:0006231;GO:0006231;GO:0004799;GO:0006231;	K00560	EC:2.1.1.45	F	1AU05;09VD7;0DGMM;0UIG2;1CRBI;KOG0673;0V6C6;12NX6	-	100347408	G1SVL8
ENSOCUG00000015930	579.0325612	442.4854395	715.5796829	1.61718244	0.693482444	0.024941372	0.849629745	GL018741	921152	953313	-	2587	ENTPD6	GO:0000166;GO:0005524;GO:0005794;GO:0016020;GO:0016021;GO:0016787;GO:0016787;GO:0016787;GO:0016787;	-	-	F	12RMD;1B2SK;0DMRC;1CWKX;09TVW;0UPI8;0V4V2;KOG1385	ectonucleoside triphosphate diphosphohydrolase 6 [Source:HGNC Symbol;Acc:HGNC:3368]	-	-
ENSOCUG00000037993	27.13186284	7.764312028	46.49941365	5.988864625	2.582282521	0.024977356	0.849629745	1	147737765	147740845	+	3081	-	-	-	-	-	-	-	-	-
ENSOCUG00000027587	38.86260147	54.33377895	23.39142399	0.430513475	-1.2158697	0.025108497	0.851494716	7	59502334	59502744	+	411	-	GO:0000786;GO:0000786;GO:0000786;GO:0003677;GO:0003677;GO:0003677;GO:0005634;GO:0005694;GO:0046982;GO:0046982;	K11253	-	B	KOG1745	-	100341005	G1TNW5
ENSOCUG00000010205	10.74326271	17.68406147	3.802463955	0.215022096	-2.217443177	0.025132311	0.851494716	11	38536981	38807128	-	13245	DNAH5	GO:0003341;GO:0003341;GO:0003351;GO:0003777;GO:0003777;GO:0003777;GO:0005524;GO:0005524;GO:0005576;GO:0005858;GO:0005930;GO:0005930;GO:0007018;GO:0007018;GO:0007368;GO:0007368;GO:0007507;GO:0021670;GO:0030286;GO:0030286;GO:0030317;GO:0036157;GO:0036158;GO:0060271;GO:0097729;	-	-	Z	1CPR2;0UHCR;0DF17;KOG3595;1B2QU;09TQZ;12Q5K;0V4Q9	dynein axonemal heavy chain 5 [Source:HGNC Symbol;Acc:HGNC:2950]	-	-
ENSOCUG00000004694	211.5588373	155.638613	267.4790616	1.718590628	0.781225933	0.025596497	0.863213352	13	41170440	41177544	+	2227	MINDY1	GO:0004843;GO:0004843;GO:0006508;GO:0071108;GO:1990380;GO:1990380;GO:0004843;GO:0005654;GO:0016604;GO:0016807;GO:0036435;GO:1990380;GO:1990380;	K01309	EC:3.4.19.12	S;T;P;I;U	09U3P;0DFDD;13HJT;1B0NR;0V52T;KOG2427;0UN3Q;1CQ35	MINDY lysine 48 deubiquitinase 1 [Source:HGNC Symbol;Acc:HGNC:25648]	100354621	G1SMB6
ENSOCUG00000022309	521.2666494	654.3048071	388.2284916	0.593345009	-0.753056871	0.025622375	0.863213352	6	4299855	4306702	-	2407	-	GO:0016021;GO:0016020;GO:0016021;GO:0016021;GO:0016021;	-	-	S	1B563;13NNW;0URSN;0DRMI;0IH06;1D0UP;0A3Z2;0VEUH	-	100347895	G1TSY3
ENSOCUG00000005579	3860.252326	4805.349334	2915.155319	0.606647949	-0.721068562	0.025633987	0.863213352	19	46700292	46761552	+	4224	-	GO:0001954;GO:0005080;GO:0005178;GO:0005178;GO:0005925;GO:0007044;GO:0007155;GO:0007160;GO:0007229;GO:0008305;GO:0009897;GO:0009986;GO:0010628;GO:0010763;GO:0016324;GO:0019899;GO:0030334;GO:0030335;GO:0032880;GO:0032956;GO:0033690;GO:0035866;GO:0036120;GO:0043277;GO:0045202;GO:0048008;GO:0048146;GO:0051611;GO:0061097;GO:0070527;GO:0071133;GO:0098978;GO:0099699;GO:1900026;GO:1903053;GO:2000406;GO:…	K06493	-	-	-	-	100008735	Q9TUN3
ENSOCUG00000026099	1219.825775	691.249444	1748.402105	2.529336003	1.3387587	0.025715417	0.863213352	19	4699358	4732292	+	1666	-	GO:0016020;GO:0016020;GO:0016021;GO:0016021;GO:0016020;GO:0016021;	K19289	-	T;U	13RKN;0VHI9;0IWVJ;0UV1Y;1D2XN;0DTPV;0A6QA;1B5P7	-	100346563	G1TRS9
ENSOCUG00000008919	2397.845677	1849.292343	2946.399012	1.593257563	0.671979509	0.025749022	0.863213352	12	72499819	72566121	+	3084	NT5E	GO:0000166;GO:0000166;GO:0000166;GO:0009166;GO:0009166;GO:0016020;GO:0016021;GO:0016787;GO:0016787;GO:0016787;GO:0016788;GO:0016788;GO:0046872;GO:0046872;GO:0000166;GO:0009166;GO:0016787;GO:0016788;GO:0046872;GO:0000166;GO:0000166;GO:0000166;GO:0005654;GO:0005829;GO:0005886;GO:0005886;GO:0006196;GO:0007159;GO:0008253;GO:0008253;GO:0009166;GO:0009166;GO:0016020;GO:0016311;GO:0016787;GO:0016787;GO:…	K19970	EC:3.1.3.5	F	0V4XY;0DF8Z;0UGGB;09TZ1;1AUS8;KOG4419;1CPYK;12NQ2	5'-nucleotidase ecto [Source:HGNC Symbol;Acc:HGNC:8021]	100356979	G1SW57
ENSOCUG00000004875	12.11191917	1.808848539	22.4149898	12.39185555	3.631320326	0.025782713	0.863213352	4	81607038	81638700	+	318	-	GO:0009055;GO:0020037;	-	-	-	-	-	-	-
ENSOCUG00000016660	3270.055473	2240.352643	4299.758303	1.919232812	0.940529728	0.025972024	0.866291808	15	10007158	10014838	-	1770	SFRP2	GO:0001569;GO:0001756;GO:0001843;GO:0002063;GO:0003151;GO:0003214;GO:0005515;GO:0005576;GO:0005615;GO:0005615;GO:0006915;GO:0007275;GO:0008047;GO:0008284;GO:0008284;GO:0008285;GO:0008584;GO:0009952;GO:0010629;GO:0010667;GO:0010719;GO:0010950;GO:0010975;GO:0016055;GO:0017147;GO:0021915;GO:0030111;GO:0030178;GO:0030178;GO:0030199;GO:0030307;GO:0030308;GO:0030336;GO:0030514;GO:0031668;GO:0033138;GO:…	K02176	-	T	1CYMG;13KV3;0VCVN;0DPNG;0A20H;0USZQ;KOG3577;1B3WU	secreted frizzled related protein 2 [Source:HGNC Symbol;Acc:HGNC:10777]	100009572	G1TC40
ENSOCUG00000015035	362.2018243	274.6652202	449.7384285	1.637405814	0.711411923	0.02597653	0.866291808	18	39394586	39493179	+	2518	HECTD2	GO:0004842;GO:0004842;GO:0016567;GO:0016740;	K12232	EC:2.3.2.26	O	1CU7R;KOG0941;1ATWM;0DFSW;09UH2;0UN62;12NRN;0V56V	HECT domain E3 ubiquitin protein ligase 2 [Source:HGNC Symbol;Acc:HGNC:26736]	100345359	G1T8L4
ENSOCUG00000013056	328.9891092	191.642314	466.3359044	2.43336607	1.282953372	0.026185423	0.866442038	10	39211107	39487758	-	4222	ZNF804B	GO:0003676;	-	-	S	0VF3T;0UR7H;1CXN2;0DNQQ;1B23G;12SCX;0A491;0IGPJ	zinc finger protein 804B [Source:HGNC Symbol;Acc:HGNC:21958]	-	-
ENSOCUG00000024007	11.23189953	4.444606769	18.01919228	4.054170193	2.019406654	0.026198025	0.866442038	7	160131267	160134358	+	1348	WNT6	GO:0001658;GO:0005102;GO:0005102;GO:0005576;GO:0005576;GO:0005576;GO:0007275;GO:0007275;GO:0007275;GO:0009798;GO:0009986;GO:0010628;GO:0010628;GO:0016055;GO:0016055;GO:0016055;GO:0016055;GO:0031012;GO:0042475;GO:0045893;GO:0060684;GO:0070172;GO:0072079;GO:0072080;	K00445	-	T	KOG3913;0DHDD;1B4XA;12PPJ;0V6K9;09VM4;0UJRZ;1CS3N	Wnt family member 6 [Source:HGNC Symbol;Acc:HGNC:12785]	100348986	-
ENSOCUG00000013067	1031.479625	797.229684	1265.729565	1.587659856	0.666901859	0.026201463	0.866442038	6	18610164	18623007	+	2000	-	GO:0016020;GO:0001508;GO:0001934;GO:0005764;GO:0005769;GO:0005770;GO:0005776;GO:0006865;GO:0006897;GO:0007040;GO:0008306;GO:0016020;GO:0016236;GO:0016477;GO:0016485;GO:0030036;GO:0031410;GO:0035235;GO:0042133;GO:0043086;GO:0043524;GO:0045861;GO:0048306;GO:0050885;GO:0051480;GO:0051489;GO:0061024;GO:0072657;GO:0072659;GO:0097352;GO:0016020;GO:0005765;GO:0016020;GO:0016020;GO:0016020;GO:0016021;GO:…	K12389	-	I;U	09U7V;1D11G;0VF3P;KOG3880;1AVBI;0UJUI;0DNVP;12P8F	-	100009244	G1T4N3
ENSOCUG00000010024	6109.848291	4689.273822	7530.422761	1.605882499	0.683366336	0.026226039	0.866442038	13	110354821	110495735	+	1910	-	GO:0006644;GO:0030111;GO:0042577;GO:0006644;GO:0006644;GO:0016020;GO:0016021;GO:0016311;GO:0030111;GO:0030111;GO:0042577;GO:0042577;GO:0006644;GO:0030111;GO:0042577;GO:0001568;GO:0001702;GO:0001933;GO:0005178;GO:0005886;GO:0006644;GO:0006644;GO:0007155;GO:0030111;GO:0030111;GO:0042392;GO:0042577;GO:0042577;GO:0050731;GO:0050821;GO:0051091;GO:0060020;GO:0060070;GO:0098609;GO:1902068;GO:0006644;GO:…	K01080	EC:3.1.3.4	I	1CU3S;13HIE;0UMQ3;0DJBJ;09ZKD;0VAH6;KOG3030;1AWNT	-	100338249	G1SYE3
ENSOCUG00000021361	946.7651313	722.7196158	1170.810647	1.620006737	0.695999813	0.026235751	0.866442038	GL018798	96530	105902	-	1516	-	GO:0005515;GO:0046872;GO:0005515;	K23353	-	Z;T	0UMYI;KOG1703;0DRIB;1D0R3;12Q0V;1B3QR;0A3YQ;0VE2V	-	100353069	G1TLY0
ENSOCUG00000008021	1164.693525	1435.884117	893.5029339	0.622266744	-0.684394949	0.026395042	0.870013333	19	39274033	39279377	+	739	-	GO:0000785;GO:0001939;GO:0001940;GO:0005634;GO:0005634;GO:0005634;GO:0005634;GO:0005721;GO:0010369;GO:0042802;GO:0045892;	K11585	-	B	0UTFK;13QN4;KOG1911;1AX10;0A2I7;0VDE5;1CZ70;0DQ5T	-	100347931	-
ENSOCUG00000007900	56.0941366	76.23477106	35.95350213	0.471615532	-1.084316862	0.026485259	0.870728269	GL018717	43912	47202	+	2216	RCOR2	GO:0003677;GO:0003677;GO:0003677;GO:0003714;GO:0005634;GO:0005634;GO:0019899;GO:0045892;	-	-	K	0V6AX;12QXT;1ATY7;09VBM;0DGK4;0UIE9;1CR9Z;KOG1194	REST corepressor 2 [Source:HGNC Symbol;Acc:HGNC:27455]	100343512	-
ENSOCUG00000023442	225.6612828	284.7156105	166.6069552	0.585169724	-0.773072967	0.026637267	0.870728269	5	29736133	29855547	+	1802	ZNRF1	GO:0004842;GO:0005768;GO:0005829;GO:0016020;GO:0043161;GO:0061630;GO:0061630;GO:0070936;	-	-	O	1D19W;KOG0801;1AUJX;0VFD7;0DQ34;0UNWG;0A3H2;13UVR	zinc and ring finger 1 [Source:HGNC Symbol;Acc:HGNC:18452]	-	-
ENSOCUG00000001279	129.0904623	74.83658777	183.3443369	2.449929137	1.292740021	0.026656651	0.870728269	13	49129843	49151893	+	1488	TSPAN2	GO:0005654;GO:0005886;GO:0006954;GO:0014002;GO:0014005;GO:0016020;GO:0016021;GO:0016021;GO:0016021;GO:0042552;GO:0043209;GO:0048709;GO:0061564;GO:0016021;GO:0016021;GO:0016021;	-	-	S;G	0UG5D;13NJF;0DF14;1ARYH;0V4Q7;KOG3882;09TQX;1CPQZ	tetraspanin 2 [Source:HGNC Symbol;Acc:HGNC:20659]	-	-
ENSOCUG00000026883	62.01249778	40.99588042	83.02911513	2.025303867	1.018138379	0.026665645	0.870728269	GL018968	10146	11627	+	786	DNASE1L2	GO:0001942;GO:0003335;GO:0004518;GO:0004519;GO:0004536;GO:0004536;GO:0006308;GO:0006308;GO:0006308;GO:0016787;GO:0090305;	K11995	EC:3.1.21.-	-	-	deoxyribonuclease 1 like 2 [Source:HGNC Symbol;Acc:HGNC:2958]	100345906	-
ENSOCUG00000029419	28.07936712	15.86148256	40.29725167	2.540572831	1.345153823	0.026672709	0.870728269	GL018776	1136530	1138341	-	1812	-	GO:0016020;GO:0016021;	-	-	-	-	-	-	-
ENSOCUG00000002771	558.9270112	426.444469	691.4095534	1.621335493	0.69718265	0.026760729	0.871928125	19	36946703	36947743	+	1041	TOB1	GO:0003714;GO:0005737;GO:0008285;GO:0008285;GO:0017148;GO:0030014;GO:0030514;GO:0030971;GO:0045668;GO:0046332;GO:0060212;GO:0060213;GO:0060390;GO:1900153;	-	-	-	-	transducer of ERBB2, 1 [Source:HGNC Symbol;Acc:HGNC:11979]	-	-
ENSOCUG00000009880	699.3411631	990.5226389	408.1596874	0.412064976	-1.27905625	0.027025037	0.878856277	19	25440410	25441006	-	597	DUSP14	GO:0000188;GO:0004725;GO:0004725;GO:0006470;GO:0006470;GO:0008138;GO:0008138;GO:0016311;GO:0016311;GO:0016787;GO:0016791;GO:0016791;GO:0017017;GO:0017017;GO:0035335;	K14165	-	V	09VQB;0DGZ0;0V6PD;1AU2G;1CRP7;139V3;0UU2X;KOG1718	dual specificity phosphatase 14 [Source:HGNC Symbol;Acc:HGNC:17007]	100349277	G1SY34
ENSOCUG00000005160	2042.3267	1565.135907	2519.517493	1.609775535	0.686859535	0.027078456	0.878912923	2	38158599	38186262	-	2238	FDFT1	GO:0004310;GO:0004310;GO:0006696;GO:0006696;GO:0008610;GO:0008610;GO:0009058;GO:0009058;GO:0016021;GO:0016021;GO:0016740;GO:0016740;GO:0016765;GO:0016765;GO:0051996;GO:0051996;GO:0004310;GO:0006696;GO:0008610;GO:0009058;GO:0016021;GO:0016740;GO:0016765;GO:0051996;GO:0004310;GO:0004310;GO:0005783;GO:0006696;GO:0006696;GO:0008610;GO:0008610;GO:0009058;GO:0009058;GO:0016021;GO:0016021;GO:0016740;GO:…	K00801	EC:2.5.1.21	I	1AW41;KOG1459;0UKN7;0DJI9;1CUAS;0V92E;12PK3;09Y4Y	farnesyl-diphosphate farnesyltransferase 1 [Source:HGNC Symbol;Acc:HGNC:3629]	100345480	G1SNB5
ENSOCUG00000006793	4512.501445	3502.288633	5522.714257	1.57688724	0.6570795	0.027298277	0.884360183	8	77230213	77458534	+	7778	LMO7	GO:0005515;GO:0023051;GO:0030155;GO:0005515;GO:0023051;GO:0030155;GO:0005515;GO:0023051;GO:0030155;GO:0005515;GO:0023051;GO:0030155;GO:0005515;GO:0005635;GO:0005654;GO:0005737;GO:0005886;GO:0016324;GO:0023051;GO:0030155;GO:0005515;GO:0023051;GO:0030155;GO:0005515;GO:0023051;GO:0030155;GO:0005515;GO:0023051;GO:0030155;GO:0005515;GO:0023051;GO:0023051;GO:0030155;GO:0030155;GO:0046872;	K06084	-	Z;T	KOG1704;0B3J3;13BKT;1BARK;0WFYK;0V2T6;0E7QX;1DEQY	LIM domain 7 [Source:HGNC Symbol;Acc:HGNC:6646]	100343307	-
ENSOCUG00000016497	27.56836812	15.40804016	39.72869608	2.578439287	1.366498075	0.027445415	0.887436526	12	23591167	23618320	-	6233	COL11A2	GO:0001894;GO:0002062;GO:0005201;GO:0005201;GO:0005581;GO:0007605;GO:0030199;GO:0048705;GO:0005201;GO:0005201;	-	-	W	0V43J;0DKYV;09T4V;1AWPQ;1CRK7;0UNFN;KOG3544;12N1R	collagen type XI alpha 2 chain [Source:HGNC Symbol;Acc:HGNC:2187]	-	-
ENSOCUG00000007089	625.983214	782.9441489	469.0222791	0.599049472	-0.739252943	0.027555206	0.888642393	11	74323968	74380326	-	3237	PLK2	GO:0004672;GO:0005515;GO:0005524;GO:0006468;GO:0000082;GO:0000166;GO:0000278;GO:0000785;GO:0004672;GO:0004672;GO:0004674;GO:0004674;GO:0004674;GO:0005515;GO:0005524;GO:0005524;GO:0005524;GO:0005737;GO:0005813;GO:0005814;GO:0006468;GO:0006468;GO:0006468;GO:0006468;GO:0007052;GO:0007093;GO:0007613;GO:0010508;GO:0016301;GO:0016310;GO:0016525;GO:0016740;GO:0018105;GO:0043008;GO:0043066;GO:0045732;GO:…	K08861	EC:2.7.11.21	D	0DJU6;0V605;09V0D;0UNVK;1B4GS;1CUT9;KOG0575;12PB0	polo like kinase 2 [Source:HGNC Symbol;Acc:HGNC:19699]	100351005	G1SSC4
ENSOCUG00000012991	11543.13203	8785.383924	14300.88013	1.627803663	0.7029267	0.027639969	0.888642393	GL018795	491951	513671	-	1424	PDIA6	GO:0005615;GO:0005623;GO:0005783;GO:0005793;GO:0005829;GO:0015037;GO:0016853;GO:0016853;GO:0045454;GO:0045454;GO:0055114;	K09584	EC:5.3.4.1	O	0VAY6;0DMM8;13H4F;0A01N;1CWGS;KOG0191;0URYC;1B1ZX	protein disulfide isomerase family A member 6 [Source:HGNC Symbol;Acc:HGNC:30168]	100346580	G1T4H3
ENSOCUG00000016703	136.9741512	98.15289908	175.7954033	1.79103628	0.840794562	0.027656045	0.888642393	12	31789452	31922133	-	4409	TRERF1	GO:0001650;GO:0003676;GO:0003676;GO:0003677;GO:0003677;GO:0005634;GO:0005654;GO:0005829;GO:0003676;GO:0003677;	-	-	K	1AUB3;1CRKM;13KUZ;0V6KZ;09VMU;0UIUE;KOG4167;0DGWA	transcriptional regulating factor 1 [Source:HGNC Symbol;Acc:HGNC:18273]	100338909	-
ENSOCUG00000007271	56.99751573	36.74182962	77.25320185	2.102595397	1.072171259	0.027780625	0.888642393	18	69525051	69530357	+	2451	-	GO:0000795;GO:0000795;GO:0007130;GO:0007130;GO:0070193;GO:0070193;GO:0000795;GO:0007130;GO:0070193;GO:0000795;GO:0007130;GO:0070193;GO:0000795;GO:0007130;GO:0070193;GO:0000795;GO:0007130;GO:0070193;	K19534	-	Z;B	0IJFM;1D200;0UTF8;0DRZ4;13NQN;0A2Y8;0VFCH;1AURY	-	100343081	-
ENSOCUG00000007374	38.00458358	75.67812466	0.331042498	0.004374349	-7.836716093	0.027782877	0.888642393	8	45269235	45299283	-	4458	ATP12A	GO:0000166;GO:0005524;GO:0006813;GO:0006885;GO:0008556;GO:0016021;GO:0016323;GO:0019829;GO:0055075;GO:0000166;GO:0000166;GO:0000166;GO:0005524;GO:0005524;GO:0005524;GO:0006811;GO:0006813;GO:0006813;GO:0006813;GO:0008556;GO:0008556;GO:0016020;GO:0016021;GO:0016021;GO:0016021;GO:0019829;GO:0019829;GO:0046872;GO:0071805;GO:0098655;	K01544	EC:7.2.2.19	-	-	ATPase H+/K+ transporting non-gastric alpha2 subunit [Source:HGNC Symbol;Acc:HGNC:13816]	100008669	Q9TV52
ENSOCUG00000005346	34.56514697	20.59525731	48.53503663	2.356612297	1.23671443	0.027811413	0.888642393	2	170123458	170388847	+	7058	TDRD15	-	-	-	K	1CV8K;0DKEM;09Z2T;0VA0D;1AZ4B;12RXU;KOG2039;0UPH7	tudor domain containing 15 [Source:HGNC Symbol;Acc:HGNC:45037]	-	-
ENSOCUG00000022672	96.06661542	66.47603885	125.657192	1.89026293	0.918586923	0.028062557	0.888642393	9	17236046	17237563	-	1518	AMIGO3	GO:0005515;GO:0016020;GO:0016021;GO:0051965;	-	-	T	0DHEB;0VD4U;0IGMJ;0URQ5;1CYWG;0A290;13H7R;1B1PN	adhesion molecule with Ig like domain 3 [Source:HGNC Symbol;Acc:HGNC:24075]	-	-
ENSOCUG00000022536	1743.37611	2443.075608	1043.676612	0.427197836	-1.227023757	0.028136206	0.888642393	15	62156544	62163765	-	1329	SPP1	GO:0001503;GO:0001503;GO:0005178;GO:0005615;GO:0005794;GO:0006710;GO:0007155;GO:0007155;GO:0007155;GO:0033280;GO:0045893;GO:0071394;GO:2000866;GO:0001503;GO:0007155;GO:0001503;GO:0007155;	K06250	-	W	1B1CS;13I3U;0IVP1;0UPAR;0DMXE;0VGDG;09UE0;1D2CJ	Oryctolagus cuniculus secreted phosphoprotein 1 (SPP1), mRNA. [Source:RefSeq mRNA;Acc:NM_001082194]	100008982	P31097
ENSOCUG00000003199	1231.092115	926.1233594	1536.06087	1.658592081	0.729959109	0.028168029	0.888642393	9	99682549	99707461	-	1719	LMAN1	GO:0005537;GO:0005537;GO:0005793;GO:0005793;GO:0005794;GO:0006888;GO:0006888;GO:0007029;GO:0007030;GO:0010638;GO:0016020;GO:0016020;GO:0016020;GO:0016021;GO:0030017;GO:0030134;GO:0044220;	K10080	-	U	KOG3838;1B0WY;1CUET;0DJMY;0UNZT;0V968;09Y8Q;12RBH	lectin, mannose binding 1 [Source:HGNC Symbol;Acc:HGNC:6631]	100354112	G1U5L3
ENSOCUG00000000765	755.4348552	967.7678679	543.1018425	0.561190199	-0.833438282	0.028225178	0.888642393	14	1623785	1675473	-	2448	HACL1	GO:0000287;GO:0001561;GO:0003824;GO:0005654;GO:0005777;GO:0016830;GO:0030976;GO:0030976;GO:0042802;GO:0043231;GO:0048037;GO:0051259;GO:0000287;GO:0000287;GO:0003824;GO:0003824;GO:0030976;GO:0030976;GO:0000287;GO:0003824;GO:0030976;GO:0000287;GO:0003824;GO:0030976;GO:0000287;GO:0003824;GO:0030976;GO:0003824;GO:0030976;GO:0030976;	K12261	EC:4.1.-.-	H;E	09Y9Z;12N4E;KOG1185;1AWT1;0UNG6;0V97G;1CRXM;0DJPI	2-hydroxyacyl-CoA lyase 1 [Source:HGNC Symbol;Acc:HGNC:17856]	100342558	-
ENSOCUG00000005899	1490.545643	2071.429286	909.6619994	0.439147021	-1.187224079	0.028231978	0.888642393	GL018739	1239243	1269152	-	635	-	GO:0016020;GO:0016021;	K16778	-	T	1B5SB;13XJM;1D3DH;0A8GE;0UVAP;0J49G;0VJYA;0DTNQ	-	103352509	-
ENSOCUG00000012572	196.8457144	249.1221355	144.5692933	0.580314925	-0.785092062	0.028234197	0.888642393	1	142597105	142633471	-	1193	PAAF1	GO:0005515;	K11887	-	S	0WCJ9;0E5JI;1B9Y5;1DCJF;0KD24;0V11D;14T82;0B02Q	proteasomal ATPase associated factor 1 [Source:HGNC Symbol;Acc:HGNC:25687]	100338035	-
ENSOCUG00000011397	34.86386247	15.33297884	54.39474609	3.547565457	1.826829304	0.02823847	0.888642393	12	30976873	30999518	-	1501	-	GO:0016020;GO:0016021;GO:0002526;GO:0002526;GO:0016020;GO:0016021;GO:0038023;GO:0038023;	K14362	-	T	0A7B0;0UUXD;0J3SD;0VI5H;1B5DQ;13YAU;1D33N;0DU5D;0A7B0;0J3SD;0VI5H;13YAU;1B5YT;1D33N;0DU5D;0UVGV	-	100349504	G1T179
ENSOCUG00000039060	11.22951845	18.16745677	4.29158014	0.236223495	-2.081775629	0.028280806	0.888642393	17	17121480	17133044	-	366	C15orf65	-	-	-	-	-	chromosome 15 open reading frame 65 [Source:HGNC Symbol;Acc:HGNC:44654]	-	-
ENSOCUG00000014668	49.98393486	32.71579856	67.25207115	2.055645104	1.039591213	0.028309404	0.888642393	2	14349580	14501645	-	4454	PPARGC1A	GO:0002021;GO:0003676;GO:0003677;GO:0003712;GO:0003713;GO:0003713;GO:0005102;GO:0005634;GO:0005634;GO:0005654;GO:0006355;GO:0007005;GO:0008134;GO:0008134;GO:0010628;GO:0010822;GO:0010822;GO:0014850;GO:0016922;GO:0022904;GO:0030374;GO:0031490;GO:0031625;GO:0032922;GO:0034599;GO:0042752;GO:0043231;GO:0043524;GO:0043565;GO:0045893;GO:0045893;GO:0045944;GO:0045944;GO:0050873;GO:0051091;GO:0060612;GO:…	K07202	-	K	13IRR;0DHMX;1B152;1CSCC;0VF4R;0A301;0IIVU;0UN56	PPARG coactivator 1 alpha [Source:HGNC Symbol;Acc:HGNC:9237]	100349219	G1T7V8
ENSOCUG00000014009	45.05699407	7.2450463	82.86894184	11.43801411	3.515764686	0.028318684	0.888642393	12	11215183	11232834	-	1470	SLC17A4	GO:0005887;GO:0016020;GO:0016021;GO:0055085;GO:0055085;	K12300	-	P;G	1CTVT;12PZZ;1AXHR;0V45C;0UGY5;KOG2532;0DJ3X;09T6K	solute carrier family 17 member 4 [Source:HGNC Symbol;Acc:HGNC:10932]	100349845	-
ENSOCUG00000033562	3.004901317	6.009802634	0	0	-Inf	0.028594707	0.894770244	GL019066	35210	35413	-	204	H2BU1	GO:0000786;GO:0000786;GO:0000786;GO:0003677;GO:0003677;GO:0003677;GO:0005634;GO:0005634;GO:0005654;GO:0005694;GO:0005829;GO:0046982;GO:0046982;	-	-	B	KOG1744	H2B.U histone 1 [Source:HGNC Symbol;Acc:HGNC:20514]	-	-
ENSOCUG00000000694	554.2803795	683.0969991	425.46376	0.622845307	-0.683054203	0.028643008	0.894770244	15	46510870	46531139	+	970	BDH2	GO:0003858;GO:0005737;GO:0005829;GO:0006635;GO:0016491;GO:0016491;GO:0030855;GO:0051287;	K00019	EC:1.1.1.30	Q	12SM2;0VB39;1CWP6;0DMTT;1AV7E;09YX5;KOG0725;0UR0W	3-hydroxybutyrate dehydrogenase 2 [Source:HGNC Symbol;Acc:HGNC:32389]	100344675	G1SDV3
ENSOCUG00000005831	6774.319021	5158.795839	8389.842202	1.626317936	0.701609324	0.028671789	0.894770244	4	2923762	2980627	-	1975	RPN2	GO:0005783;GO:0005789;GO:0006486;GO:0006487;GO:0006487;GO:0006487;GO:0008250;GO:0008250;GO:0008250;GO:0016021;GO:0016021;GO:0006487;GO:0006487;GO:0008250;GO:0016021;GO:0006487;GO:0008250;GO:0016021;	K12667	-	-	-	ribophorin II [Source:HGNC Symbol;Acc:HGNC:10382]	103348184	-
ENSOCUG00000001173	45.90893279	29.66904603	62.14881955	2.094736026	1.06676845	0.028786297	0.896698432	14	55201225	55547564	+	1095	PPM1L	GO:0000165;GO:0003824;GO:0004722;GO:0004722;GO:0006470;GO:0007178;GO:0043169;GO:0003824;GO:0003824;GO:0004722;GO:0004722;GO:0006470;GO:0006470;	-	-	T	0DIR6;0URR3;0V8BU;1CTG8;1B1QP;12SKE;09XDQ;KOG0698	protein phosphatase, Mg2+/Mn2+ dependent 1L [Source:HGNC Symbol;Acc:HGNC:16381]	-	-
ENSOCUG00000021745	1322.00767	982.4275378	1661.587802	1.691308252	0.758139625	0.028905396	0.898762287	GL018820	15959	30954	+	1765	LHFPL2	GO:0016020;GO:0016021;	K23893	-	G;U	1CUAA;KOG4026;0VASE;0UQKM;1B0C2;1361E;09ZVZ;0DJHV	LHFPL tetraspan subfamily member 2 [Source:HGNC Symbol;Acc:HGNC:6588]	100348792	G1U7K5
ENSOCUG00000017895	2.952808357	5.905616715	0	0	-Inf	0.028981029	0.899205776	2	90925884	90989323	+	2055	RFX8	GO:0003677;GO:0003677;GO:0003700;GO:0003700;GO:0006355;GO:0006355;GO:0003677;GO:0003700;GO:0006355;GO:0003677;GO:0003700;GO:0006355;GO:0003677;GO:0003700;GO:0006355;	-	-	K	1B1WP;KOG3712;0URSP;1CXCJ;0VBQN;0DNF9;0A0TY;12T43	RFX family member 8, lacking RFX DNA binding domain [Source:HGNC Symbol;Acc:HGNC:37253]	100344807	-
ENSOCUG00000024568	26.61138734	13.28438768	39.93838699	3.006415346	1.588044336	0.029108177	0.899205776	1	182810136	182821755	-	1776	-	-	-	-	-	-	-	-	-
ENSOCUG00000004978	30.20200858	17.20682241	43.19719475	2.510469029	1.327956927	0.029123663	0.899205776	18	46008465	46163065	-	2978	CRTAC1	GO:0005509;GO:0005509;GO:0005509;GO:0005509;GO:0007413;GO:0021772;GO:0030426;GO:1900121;	-	-	-	-	cartilage acidic protein 1 [Source:HGNC Symbol;Acc:HGNC:14882]	100352703	G1SMX6
ENSOCUG00000010790	365.8622535	276.347994	455.3765131	1.647837231	0.720573744	0.029131137	0.899205776	GL018823	577792	585657	+	2752	C2CD2L	GO:0008526;GO:0015914;GO:0016020;GO:0016021;GO:0016021;GO:0032541;GO:0035091;GO:0035774;GO:0035774;GO:0043559;GO:0098592;GO:0140268;	-	-	S	12U95;0IIDQ;1CYYI;0UGPE;0VD8C;0A2CG;0DJSC;1ASDZ	C2CD2 like [Source:HGNC Symbol;Acc:HGNC:29000]	100337775	-
ENSOCUG00000008469	216.8249877	141.8965365	291.7534389	2.05609979	1.039910285	0.029229595	0.900610422	12	122542863	122644062	-	2120	MOXD1	GO:0003824;GO:0003824;GO:0004497;GO:0004497;GO:0005507;GO:0005507;GO:0005789;GO:0016715;GO:0016715;GO:0055114;GO:0055114;	-	-	E	1CSTB;0DI2W;KOG3568;0V69M;09W0Q;12RD1;1AX6U;0UHHN	monooxygenase DBH like 1 [Source:HGNC Symbol;Acc:HGNC:21063]	-	-
ENSOCUG00000005445	2231.491018	3173.127381	1289.854655	0.406493185	-1.29869693	0.029413091	0.903366558	18	37294804	37356907	+	8052	-	GO:0005515;GO:0005737;GO:0009615;GO:0050688;GO:0071357;GO:0071360;GO:0005515;GO:0005737;GO:0005737;GO:0009615;GO:0009615;GO:0050688;GO:0050688;GO:0071357;GO:0071357;GO:0071360;GO:0071360;GO:0005515;GO:0005737;GO:0009615;GO:0050688;GO:0071357;GO:0071360;GO:0005515;GO:0005515;GO:0005737;GO:0005737;GO:0009615;GO:0009615;GO:0050688;GO:0050688;GO:0071357;GO:0071357;GO:0071360;GO:0071360;GO:0005515;GO:…	K14217	-	S;P	0DNWM;0A0WM;1CXU0;13I8N;1B0KV;0V5W7;KOG1124;0UM6F;0DNWM;0A0WM;1CXU0;13I8N;1B0KV;0V5W7;KOG1124;0UM6F;1DCPD;0B07R;0KD74;1BA0P;0E5PI;0WCQ9;0V14V;14TD7	-	100342069	-
ENSOCUG00000017351	348.5209287	261.534941	435.5069163	1.665195919	0.735691928	0.029425275	0.903366558	17	27001794	27020283	-	601	BLOC1S6	GO:0005768;GO:0007596;GO:0008089;GO:0030318;GO:0031083;GO:0031175;GO:0032816;GO:0033299;GO:0043473;GO:0048490;GO:0061025;GO:1904115;	K20188	-	U	1D16J;1AT5Q;13QNF;0UQTD;0IX0Y;0DR4N;0VF9B;0A4EF	biogenesis of lysosomal organelles complex 1 subunit 6 [Source:HGNC Symbol;Acc:HGNC:8549]	100354374	G1TDI6
ENSOCUG00000033788	176.3966857	225.4852854	127.3080861	0.564595982	-0.824709234	0.02964963	0.90755812	12	38794476	38795346	+	665	-	-	-	-	-	-	-	-	-
ENSOCUG00000003792	3682.747075	4987.458163	2378.035988	0.476803195	-1.068534191	0.02970367	0.90755812	17	32568969	32583143	-	4319	THBS1	GO:0000187;GO:0001786;GO:0001937;GO:0001953;GO:0001968;GO:0002040;GO:0002544;GO:0002581;GO:0002605;GO:0005178;GO:0005509;GO:0005509;GO:0005509;GO:0005515;GO:0005576;GO:0005576;GO:0005577;GO:0005615;GO:0005615;GO:0005615;GO:0006954;GO:0006954;GO:0006954;GO:0006955;GO:0007050;GO:0007155;GO:0007155;GO:0008201;GO:0008201;GO:0008201;GO:0008284;GO:0009749;GO:0009897;GO:0009986;GO:0010595;GO:0010596;GO:…	K16857	-	W	12R26;0IFQQ;0V6VV;0A0RB;0UH57;0DNNJ;1ASTS;1CY61	thrombospondin 1 [Source:HGNC Symbol;Acc:HGNC:11785]	100350430	G1SKF1
ENSOCUG00000025851	542.0164263	397.0401249	686.9927277	1.730285391	0.791010013	0.029721888	0.90755812	4	47824495	47965996	-	2804	-	GO:0004181;GO:0004181;GO:0006508;GO:0006508;GO:0008270;GO:0008270;GO:0004181;GO:0004181;GO:0006508;GO:0006508;GO:0008270;GO:0008270;GO:0004181;GO:0006508;GO:0008270;	K01296	EC:3.4.17.12	O;T;E;U	1CZIQ;12P19;0UHS2;0DQGM;09V9C;0V6KB;KOG2649;1B478	-	100349485	-
ENSOCUG00000023193	38.38513321	53.68902281	23.08124361	0.429906197	-1.217906189	0.029856242	0.910026816	13	29951645	29998388	+	1863	-	GO:0003824;GO:0046872;GO:0003824;GO:0046872;	-	-	-	-	-	-	-
ENSOCUG00000017747	596.9954449	449.792502	744.1983878	1.654537113	0.726427653	0.029910657	0.910054467	8	6871557	7166727	+	2522	CPNE8	-	-	-	T	0V43Q;09T4Y;1AUTW;KOG1327;0DH8P;12Q7Z;0UJAY;1CRIQ	copine 8 [Source:HGNC Symbol;Acc:HGNC:23498]	100358943	-
ENSOCUG00000000864	2161.225276	2661.118779	1661.331772	0.624298241	-0.679692695	0.030100687	0.913085668	1	100913917	101263559	+	4366	CADM1	GO:0005102;GO:0005886;GO:0008037;GO:0042271;GO:0045954;GO:0050715;GO:0051606;GO:0016020;GO:0016021;	K06781	-	-	-	cell adhesion molecule 1 [Source:HGNC Symbol;Acc:HGNC:5951]	100354915	-
ENSOCUG00000005106	57.40916254	33.59064518	81.22767989	2.418163731	1.273911931	0.03018081	0.913085668	13	123402086	123485270	-	4999	CFAP57	GO:0005515;GO:0005515;GO:0005515;GO:0005515;GO:0005515;GO:0005515;GO:0005515;GO:0005515;	-	-	S	1CTEG;0UM8Z;09XC4;0V8AF;0IEIB;0DIPI;12QS8;1AWR5	cilia and flagella associated protein 57 [Source:HGNC Symbol;Acc:HGNC:26485]	100356119	G1SN80
ENSOCUG00000015599	108.8256024	140.9383238	76.71288113	0.544301075	-0.877523209	0.030183482	0.913085668	2	147600542	147606217	-	620	GEMIN6	GO:0000245;GO:0000245;GO:0000387;GO:0005634;GO:0005634;GO:0005654;GO:0005737;GO:0005829;GO:0016604;GO:0032797;GO:0034719;GO:0097504;	-	-	A	0V839;0DIFS;1CT6G;1AXDP;12X27;09X4T;0IIGY;0UKZI	gem nuclear organelle associated protein 6 [Source:HGNC Symbol;Acc:HGNC:20044]	-	-
ENSOCUG00000016746	911.2650628	710.971213	1111.558912	1.563437298	0.644721361	0.030225025	0.913085668	2	90431206	90467153	-	1372	IL1R2	GO:0004908;GO:0004908;GO:0004908;GO:0004910;GO:0004910;GO:0005737;GO:0010955;GO:0016020;GO:0016021;GO:0019221;GO:0019966;GO:0050712;GO:1900016;GO:2000660;	K04387	-	T	13JKH;1AUSK;0UJ9N;0DH7J;1CRXR;09VYU;0IJCQ;0V6X6	interleukin 1 receptor type 2 [Source:HGNC Symbol;Acc:HGNC:5994]	100344048	G1TCA1
ENSOCUG00000008583	98.20763485	127.0962299	69.31903976	0.545405948	-0.874597662	0.030292817	0.913511045	9	74009965	74132344	-	2974	KLHL14	GO:0005515;GO:0005783;GO:0005829;GO:0015629;GO:0016235;GO:0043005;GO:0043025;	K10451	-	T	0UMK4;0V8I0;1ATM8;13KF9;1CTP7;0DIXS;09XK2;KOG4441	kelch like family member 14 [Source:HGNC Symbol;Acc:HGNC:29266]	100349752	G1SVG1
ENSOCUG00000007801	1329.380004	1014.340929	1644.419079	1.621169995	0.697035379	0.03045524	0.916783593	13	52763419	52772856	+	1919	WDR77	GO:0005515;GO:0005634;GO:0005654;GO:0005737;GO:0005794;GO:0005829;GO:0006357;GO:0008284;GO:0008285;GO:0008327;GO:0030374;GO:0034709;GO:0060528;GO:0060770;GO:0005515;	K13221	-	A	0E7Z1;1BAVB;13C93;0B3X8;1DEYG;0IP8S;0WGC6;0V2YD	WD repeat domain 77 [Source:HGNC Symbol;Acc:HGNC:29652]	100352088	-
ENSOCUG00000002699	649.5811318	809.2411692	489.9210943	0.60540802	-0.724020307	0.030638697	0.917187126	14	96519525	96550831	+	2638	PARP9	GO:0000122;GO:0002230;GO:0003714;GO:0003950;GO:0003950;GO:0003950;GO:0004857;GO:0005634;GO:0005654;GO:0005737;GO:0005739;GO:0005829;GO:0006302;GO:0006471;GO:0010608;GO:0010629;GO:0019899;GO:0032991;GO:0035563;GO:0042393;GO:0042531;GO:0043086;GO:0044389;GO:0045893;GO:0060330;GO:0060335;GO:0060335;GO:0072570;GO:0090734;GO:0097677;GO:1900182;GO:2001034;	K15260	EC:2.4.2.30	-	-	poly(ADP-ribose) polymerase family member 9 [Source:HGNC Symbol;Acc:HGNC:24118]	100340769	-
ENSOCUG00000023758	348.5055205	437.8493634	259.1616775	0.591896892	-0.756582213	0.030659288	0.917187126	8	27931	32640	+	1380	-	GO:0005085;GO:0005085;GO:0005085;GO:0007264;GO:0007264;GO:0035556;	K08014	-	T	KOG2378;1ASQF;09UCE;0UH16;12PYW;0V5BN;0DFN2;1CQBM	-	100356363	-
ENSOCUG00000026023	313.6392396	15.94411074	611.3343684	38.34233081	5.260866135	0.030759147	0.917187126	13	53708412	53716711	-	1962	-	GO:0004190;GO:0004190;GO:0004190;GO:0006508;GO:0006508;GO:0006508;GO:0008233;GO:0016787;	K01378	EC:3.4.23.4	O	09ZQR;1AVY1;0VDWK;0DQP2;KOG1339;1CZBX;13A5X;0UR97	-	100354542	G1U5K8
ENSOCUG00000004230	345.4441906	242.4613374	448.4270439	1.849478555	0.887118572	0.030822335	0.917187126	X	31726075	31893428	-	2181	SLC9A7	GO:0006811;GO:0006812;GO:0006812;GO:0006814;GO:0006814;GO:0006814;GO:0006885;GO:0006885;GO:0015297;GO:0015299;GO:0015299;GO:0015385;GO:0015385;GO:0016020;GO:0016021;GO:0016021;GO:0016021;GO:0035725;GO:0043231;GO:0055085;GO:0055085;GO:1902600;	K12041	-	P	09V6X;0URJJ;0VA1J;KOG1965;12QN3;0DGUJ;1AZPE;1CX61	solute carrier family 9 member A7 [Source:HGNC Symbol;Acc:HGNC:17123]	100338434	-
ENSOCUG00000003905	2997.085936	3693.718025	2300.453847	0.622801695	-0.683155224	0.030925251	0.917187126	13	79255270	79257963	-	1803	CCN1	GO:0001649;GO:0001934;GO:0002041;GO:0003181;GO:0003278;GO:0003281;GO:0005178;GO:0005515;GO:0005520;GO:0005520;GO:0005576;GO:0005576;GO:0005576;GO:0007155;GO:0010518;GO:0010811;GO:0030198;GO:0030335;GO:0030335;GO:0030501;GO:0030513;GO:0033690;GO:0043065;GO:0043066;GO:0043280;GO:0044319;GO:0045597;GO:0045669;GO:0045860;GO:0045944;GO:0050840;GO:0060413;GO:0060591;GO:0060710;GO:0060716;GO:0061036;GO:…	K06829	-	W	13MDU;0IIY0;0V98S;0DJQX;1AY1V;0UN0I;1CUHY;09YB6	cellular communication network factor 1 [Source:HGNC Symbol;Acc:HGNC:2654]	100339657	G1SKP1
ENSOCUG00000006355	447.5822807	625.4693935	269.6951678	0.431188433	-1.213609617	0.030936644	0.917187126	2	46416433	46504684	-	6156	DDX60	GO:0003676;GO:0003676;GO:0003690;GO:0003725;GO:0003727;GO:0005524;GO:0005524;GO:0005737;GO:0005829;GO:0009615;GO:0045111;GO:1900245;GO:1900246;GO:0003676;GO:0005524;	K20103	EC:3.6.4.13	A	KOG0949;0UMKZ;1AX3N;0A0C4;12SQZ;0DIYN;0V75Y;1CTQ4	DExD/H-box helicase 60 [Source:HGNC Symbol;Acc:HGNC:25942]	100345657	-
ENSOCUG00000000585	157.6501089	102.4785858	212.821632	2.076742476	1.054322327	0.030977418	0.917187126	5	22312327	22315347	-	2061	RRAD	GO:0003924;GO:0005525;GO:0007165;GO:0016020;GO:1901841;GO:0000166;GO:0003924;GO:0003924;GO:0003924;GO:0005525;GO:0005525;GO:0005525;GO:0007165;GO:0007165;GO:0016020;GO:0016020;GO:1901841;GO:1901841;GO:1901842;GO:1901842;GO:1901842;	K07845	-	S;J	0V6AT;1ATJB;09VBH;12RPT;0UHZS;KOG0395;1CR9U;0DGJZ	RRAD, Ras related glycolysis inhibitor and calcium channel regulator [Source:HGNC Symbol;Acc:HGNC:10446]	100350991	G1SDL8
ENSOCUG00000000119	47.44329211	24.66207259	70.22451164	2.847469992	1.509680638	0.030994964	0.917187126	14	92520324	92533777	-	1023	SLC51A	GO:0005789;GO:0005886;GO:0005886;GO:0015125;GO:0015721;GO:0016020;GO:0016021;GO:0016021;GO:0016323;GO:0016323;GO:0022857;GO:0032782;GO:0032991;GO:0042803;GO:0046982;GO:0055085;GO:0071702;	K14360	-	P	0V9ZK;0IKZG;0UPFU;09Z25;1CRXZ;0DK6N;1ASSY;135TK	solute carrier family 51 alpha subunit [Source:HGNC Symbol;Acc:HGNC:29955]	100009015	G1SCM4
ENSOCUG00000010854	80.16413783	54.75767533	105.5706003	1.927959865	0.947075019	0.031011349	0.917187126	2	145798231	146123830	+	4147	SLC8A1	GO:0005432;GO:0005432;GO:0005654;GO:0005886;GO:0005887;GO:0006816;GO:0006883;GO:0007154;GO:0008092;GO:0016020;GO:0016021;GO:0030501;GO:0030506;GO:0035725;GO:0035994;GO:0055085;GO:0070509;GO:0070588;GO:0098719;GO:0098735;GO:0005432;GO:0006816;GO:0007154;GO:0016020;GO:0016021;GO:0055085;GO:0005432;GO:0006816;GO:0007154;GO:0016020;GO:0016021;GO:0055085;GO:0005432;GO:0005432;GO:0006816;GO:0006816;GO:…	-	-	T;P	KOG1306;0V989;0DJQD;1CUHC;0UKXA;09VNB;12S8D	Oryctolagus cuniculus solute carrier family 8 member A1 (SLC8A1), mRNA. [Source:RefSeq mRNA;Acc:NM_001170958]	-	-
ENSOCUG00000034254	66.30988835	88.84469568	43.77508102	0.492714626	-1.021175797	0.031077443	0.917187126	GL018738	756282	772583	-	3270	ZSCAN2	GO:0003676;GO:0003676;GO:0003700;GO:0006355;	-	-	-	-	zinc finger and SCAN domain containing 2 [Source:HGNC Symbol;Acc:HGNC:20994]	-	-
ENSOCUG00000029361	18.12703593	27.082299	9.171772867	0.338663009	-1.56207768	0.031105694	0.917187126	GL018754	1717729	1727358	+	1110	-	GO:0003676;GO:0003676;GO:0006355;	-	-	-	-	-	-	-
ENSOCUG00000016591	410.7002283	211.3726605	610.0277962	2.886029796	1.529086195	0.031115767	0.917187126	GL018730	1769141	1816632	-	2214	GFPT2	GO:0004360;GO:0097367;GO:1901135;GO:1901137;GO:1990830;GO:0004360;GO:0097367;GO:1901135;GO:1901137;GO:0004360;GO:0004360;GO:0097367;GO:0097367;GO:1901135;GO:1901135;GO:1901137;GO:1901137;	K00820	EC:2.6.1.16	M	1CQT4;1B3QP;09UU8;12T99;0DG3J;0V5TQ;0USBT;KOG1268	glutamine-fructose-6-phosphate transaminase 2 [Source:HGNC Symbol;Acc:HGNC:4242]	100347096	G1TBY9
ENSOCUG00000033164	9.789111968	3.256128119	16.32209582	5.012731446	2.325596945	0.031260615	0.919862524	11	7933631	7934287	-	657	-	GO:1990817;	-	-	-	-	-	-	-
ENSOCUG00000020975	576.1554617	421.4131871	730.8977363	1.734396926	0.794434105	0.031391967	0.922132244	GL019091	156672	157735	-	422	CSTB	GO:0002020;GO:0004866;GO:0004866;GO:0004869;GO:0004869;GO:0004869;GO:0005615;GO:0005730;GO:0005737;GO:0005829;GO:0010466;GO:0010951;GO:0045861;	K13907	-	S	0UVZ8;0DUXG;1D4AB;13V2Y;1B67I;0IZK7;0A8EK;0VJAN	cystatin B [Source:HGNC Symbol;Acc:HGNC:2482]	100008600	O97861
ENSOCUG00000006264	209.5410497	260.9695829	158.1125165	0.60586569	-0.722930086	0.03181122	0.932836593	14	33152310	33290964	-	4517	-	GO:0002138;GO:0003824;GO:0005829;GO:0006776;GO:0008289;GO:0009058;GO:0002138;GO:0002138;GO:0003824;GO:0005829;GO:0005829;GO:0006776;GO:0006776;GO:0008289;GO:0008289;GO:0009058;GO:0002138;GO:0003824;GO:0005829;GO:0006776;GO:0008289;GO:0009058;GO:0000166;GO:0000309;GO:0003824;GO:0003824;GO:0004515;GO:0005524;GO:0009058;GO:0009058;GO:0009435;GO:0009435;GO:0009435;GO:0016740;GO:0016779;GO:0016779;GO:…	K06210	-	H;I	09VHT;1CXAY;0DFH5;13IPW;KOG3199;1AU5X;0VBNY;0UING;0A6MK;0UV59;KOG4015;1D35Z;0VHP8;0DTTU;13Q08;1B5Q4	-	100354704	G1SQM9
ENSOCUG00000000493	1474.931472	1809.762268	1140.100676	0.629972619	-0.66663897	0.031906088	0.934008169	GL019055	46082	149475	-	6336	PITPNM2	GO:0005548;GO:0015914;GO:0046872;GO:0005548;GO:0015914;GO:0046872;GO:0005548;GO:0015914;GO:0046872;GO:0005509;GO:0005548;GO:0005548;GO:0008526;GO:0015914;GO:0015914;GO:0030971;GO:0046872;GO:0046872;GO:0048015;GO:0005548;GO:0015914;GO:0046872;GO:0005548;GO:0015914;GO:0046872;GO:0005548;GO:0015914;	-	-	T;I	12NIU;KOG3668;0V544;1ATZP;09U50;0UJRY;1CS31;0DHCT	phosphatidylinositol transfer protein membrane associated 2 [Source:HGNC Symbol;Acc:HGNC:21044]	100338877	-
ENSOCUG00000021436	75.26498222	51.61721731	98.91274713	1.916274303	0.938304089	0.032040064	0.935611356	12	12818	66740	-	1751	-	GO:0003810;GO:0018149;GO:0072378;GO:0003810;GO:0003810;GO:0018149;GO:0018149;GO:0072378;GO:0072378;	-	-	-	-	-	-	-
ENSOCUG00000004837	590.5909476	451.4701886	729.7117066	1.616300976	0.692695872	0.032070874	0.935611356	GL018810	626149	636862	-	1916	GUCD1	-	-	-	S;J	0A2DM;1B1FB;0UTB8;1CZ1F;KOG4621;0VD97;13BKJ;0DQ0V	guanylyl cyclase domain containing 1 [Source:HGNC Symbol;Acc:HGNC:14237]	100357533	-
ENSOCUG00000027736	17730.46882	7191.470527	28269.46712	3.930971699	1.974885977	0.032239012	0.937757656	1	91580935	91582191	-	710	-	-	-	-	-	-	-	103348992	G1TK70
ENSOCUG00000013436	284.6451228	192.0542343	377.2360114	1.96421606	0.973953632	0.032326812	0.937757656	X	3295817	3672412	+	5750	NHS	GO:0002088;GO:0005794;GO:0016604;GO:0030054;GO:0030154;	-	-	S	0DQC8;1AUT3;1CT7H;0VBUT;0A052;0IJ2I;0UJA2;12RWK	NHS actin remodeling regulator [Source:HGNC Symbol;Acc:HGNC:7820]	100353120	-
ENSOCUG00000013482	18.11405596	8.867663067	27.36044886	3.085418182	1.625466038	0.032364693	0.937757656	GL018874	376357	387117	+	3736	-	-	-	-	O	1B61S;0A7N0;0VIGH;0IXZC;13S9C;0UVDU;1D3QX;0DUD7	-	100358310	G1T5G9
ENSOCUG00000029716	1513.214256	1177.816514	1848.611999	1.569524606	0.650327647	0.032366157	0.937757656	1	143121404	143178602	-	6399	ARHGEF17	GO:0005085;GO:0005085;GO:0005089;GO:0005089;GO:0005515;GO:0030036;GO:0035023;GO:0005089;GO:0005515;GO:0035023;	K20689	-	-	-	Rho guanine nucleotide exchange factor 17 [Source:HGNC Symbol;Acc:HGNC:21726]	100358319	-
ENSOCUG00000016738	228.6768439	157.0282276	300.3254601	1.912557154	0.935502861	0.032453806	0.937757656	1	11180155	11400562	+	3549	GRIN3A	GO:0004970;GO:0004970;GO:0005216;GO:0005216;GO:0005886;GO:0006811;GO:0006811;GO:0006811;GO:0015276;GO:0015276;GO:0016020;GO:0016020;GO:0016020;GO:0016021;GO:0030054;GO:0034220;GO:0035235;GO:0038023;GO:0038023;GO:0045202;GO:0045211;GO:0004970;GO:0004970;GO:0004972;GO:0005216;GO:0005216;GO:0005886;GO:0006811;GO:0006811;GO:0006811;GO:0015276;GO:0015276;GO:0016020;GO:0016020;GO:0016020;GO:0016020;GO:…	K05213	-	T	1AWBT;12S7K;09XZW;0UHCN;1CW3W;KOG1053;0VAMA;0DM8Q	glutamate ionotropic receptor NMDA type subunit 3A [Source:HGNC Symbol;Acc:HGNC:16767]	100343526	G1TC94
ENSOCUG00000012353	20.10747458	29.62535549	10.58959367	0.357450349	-1.484185232	0.032475262	0.937757656	21	9044978	9057009	+	1151	SDSL	GO:0006520;GO:0006520;GO:0030170;GO:0030170;GO:0042802;	-	-	E	0DGS5;09VHF;1AYXH;12RHD;0UQ08;KOG1250;1CRG8;0V6GP	serine dehydratase like [Source:HGNC Symbol;Acc:HGNC:30404]	-	-
ENSOCUG00000005190	203.4889011	142.2923971	264.6854051	1.860151424	0.895420068	0.032579522	0.939012325	13	112060346	112092315	+	2551	DHCR24	GO:0000246;GO:0005634;GO:0005783;GO:0006695;GO:0006695;GO:0006979;GO:0008104;GO:0008203;GO:0009888;GO:0009888;GO:0016020;GO:0016021;GO:0016125;GO:0016491;GO:0016491;GO:0016628;GO:0019899;GO:0030539;GO:0031639;GO:0042605;GO:0042987;GO:0043066;GO:0043154;GO:0043588;GO:0050660;GO:0050660;GO:0055114;GO:0055114;GO:0055114;GO:0061024;GO:0071949;GO:0071949;	K09828	-	C	0VAFM;09ZIP;12T3B;0DM1R;1AVSH;1CVWS;0UKEM;KOG1262	24-dehydrocholesterol reductase [Source:HGNC Symbol;Acc:HGNC:2859]	100339404	G1SNE3
ENSOCUG00000022511	267.8323071	154.0773271	381.587287	2.476595967	1.308358526	0.032683013	0.939012325	GL019599	24454	33370	+	1818	-	GO:0007009;GO:0007009;GO:0008093;GO:0008093;GO:0032956;GO:0032956;	-	-	Z	0UHUT;13K42;1ATEX;0DJC6;09XZ5;1CU4E;0IKMM;0V8WX	-	-	-
ENSOCUG00000016177	735.8814321	559.406613	912.3562513	1.630935763	0.70569996	0.032735776	0.939012325	1	3846120	3992093	+	3311	EPB41L4B	GO:0005737;GO:0005829;GO:0005856;GO:0005856;GO:0005886;GO:0008092;GO:0008092;GO:0010628;GO:0031032;GO:0042060;GO:0045177;GO:0045785;GO:0051549;GO:0005856;GO:0008092;GO:0005856;GO:0008092;	K21111	-	S	0VCWW;0UFGX;1AS8C;0DQE9;13545;1CX5I;0A0II;KOG3530	erythrocyte membrane protein band 4.1 like 4B [Source:HGNC Symbol;Acc:HGNC:19818]	108177971	-
ENSOCUG00000005592	31257.87977	37984.17635	24531.58319	0.645836913	-0.630758194	0.032786431	0.939012325	4	70315437	70323221	-	1855	LUM	GO:0005515;GO:0005518;GO:0005583;GO:0007601;GO:0007601;GO:0030199;GO:0030199;GO:0031012;GO:0032914;GO:0045944;GO:0062023;GO:0062023;	K08122	-	T	KOG0619;0DM6S;0VA5G;13JMQ;1AWKW;09ZNZ;1CW1X;0UQB4	Oryctolagus cuniculus lumican (LUM), mRNA. [Source:RefSeq mRNA;Acc:NM_001195680]	100008665	G1SP97
ENSOCUG00000028037	229.7419077	287.0123467	172.4714687	0.600920032	-0.734755079	0.032865788	0.939012325	GL019705	255	2672	+	480	-	GO:0003676;GO:0003676;	-	-	L	13MVV;0DP42;1CZQR;KOG2249;0A30D;0UTK6;0VDVH;1B0D2	-	-	-
ENSOCUG00000010519	16.89871676	25.77365788	8.023775634	0.311316914	-1.683544133	0.032906142	0.939012325	18	41258584	41280898	+	1844	FFAR4	GO:0004930;GO:0004930;GO:0004930;GO:0005504;GO:0005886;GO:0007186;GO:0007186;GO:0007186;GO:0008527;GO:0010827;GO:0016020;GO:0016021;GO:0016021;GO:0016021;GO:0030139;GO:0043066;GO:0045444;GO:0046879;GO:0050710;GO:0050728;GO:0050912;GO:0070374;GO:0120162;	-	-	T	KOG3656;0URTD;1B1T8;0DMDU;13JYS;09ZVB;1CW93;0V5NB	free fatty acid receptor 4 [Source:HGNC Symbol;Acc:HGNC:19061]	-	-
ENSOCUG00000013287	214.0566061	271.863368	156.2498442	0.57473666	-0.799027018	0.032940796	0.939012325	9	72934028	73001479	-	2251	B4GALT6	GO:0001572;GO:0005975;GO:0008378;GO:0008489;GO:0010706;GO:0016757;GO:0021955;GO:0022010;GO:0042551;GO:0005975;GO:0016757;GO:0005975;GO:0016757;GO:0005975;GO:0016757;GO:0005975;GO:0005975;GO:0016757;GO:0016757;	K07553	EC:2.4.1.274	G	KOG3916;12SA9;1CW75;0UPSJ;09YB2;0VAQ3;0DMC0;1B08Y	beta-1,4-galactosyltransferase 6 [Source:HGNC Symbol;Acc:HGNC:929]	100348067	G1T538
ENSOCUG00000015193	604.2986218	465.6401619	742.9570818	1.595560569	0.674063376	0.033059015	0.939012325	GL019120	36526	70775	-	3143	SLC45A4	GO:0008506;GO:0015770;GO:0016020;GO:0016021;GO:0016020;GO:0016021;	K15378	-	G	0V0UV;0AZTW;1DCBY;0KCSQ;14SYF;1B9TP;0WCA9;0E5BW	solute carrier family 45 member 4 [Source:HGNC Symbol;Acc:HGNC:29196]	100358142	-
ENSOCUG00000008635	2350.781072	2886.016386	1815.545758	0.629083663	-0.668676199	0.033087161	0.939012325	13	127947972	128084797	-	3200	-	GO:0003824;GO:0003824;GO:0004571;GO:0004571;GO:0005509;GO:0005509;GO:0008152;GO:0016020;GO:0016020;GO:0016787;GO:0016798;GO:0003824;GO:0004571;GO:0005509;GO:0016020;	K01230	EC:3.2.1.113	-	-	-	100354369	-
ENSOCUG00000036700	8.651884873	14.49151049	2.812259256	0.194062535	-2.365406474	0.033122245	0.939012325	12	10723736	10730957	-	891	-	GO:0005515;	-	-	-	-	-	-	-
ENSOCUG00000009064	373.6851875	285.165803	462.2045721	1.620827488	0.696730546	0.033126023	0.939012325	GL018993	181717	278544	+	3587	FARP2	GO:0005085;GO:0005089;GO:0005089;GO:0005737;GO:0005856;GO:0005856;GO:0016322;GO:0016601;GO:0035023;	K06082	-	T	09YIF;0V88Q;1AZ00;0UG00;12QVW;0DMWT;1CYJK;KOG3531	FERM, ARH/RhoGEF and pleckstrin domain protein 2 [Source:HGNC Symbol;Acc:HGNC:16460]	100339286	-
ENSOCUG00000008254	1483.414886	1140.994141	1825.835631	1.60021473	0.678265511	0.03331464	0.942787694	3	17375678	17465899	+	4265	SEC24A	GO:0006886;GO:0006888;GO:0008270;GO:0030127;GO:0000139;GO:0006886;GO:0006886;GO:0006888;GO:0006888;GO:0006888;GO:0008270;GO:0008270;GO:0008270;GO:0015031;GO:0030127;GO:0030127;GO:0030127;GO:0090110;	K14007	-	U	09UWU;12NEV;1AVEH;0DHBF;0UIPS;1CS1K;KOG1985;0V5WN	SEC24 homolog A, COPII coat complex component [Source:HGNC Symbol;Acc:HGNC:10703]	100340644	G1SUT8
ENSOCUG00000009464	18.69909841	9.788102791	27.61009403	2.820780964	1.496094644	0.033696754	0.951737132	12	55135770	55989025	+	4612	ADGRB3	GO:0004888;GO:0004930;GO:0005096;GO:0005886;GO:0007166;GO:0007186;GO:0007520;GO:0016020;GO:0016021;GO:0016322;GO:0016525;GO:0043083;GO:0048814;GO:0051965;GO:0061743;GO:0098794;GO:0099558;GO:0004888;GO:0004888;GO:0004930;GO:0004930;GO:0004930;GO:0007165;GO:0007166;GO:0007166;GO:0007186;GO:0007186;GO:0007186;GO:0016020;GO:0016020;GO:0016020;GO:0016021;GO:0016021;GO:0016021;GO:0016525;GO:0016525;	K04598	-	W;T	1AVMW;12QJR;0IEA0;0V7S1;1CSK4;09WU2;0DHVI;0UHEC	adhesion G protein-coupled receptor B3 [Source:HGNC Symbol;Acc:HGNC:945]	100348237	-
ENSOCUG00000002313	142.3781147	179.764369	104.9918605	0.584052674	-0.775829607	0.033742797	0.951737132	21	3011832	3033870	+	2420	SEC14L2	GO:0005654;GO:0005829;	-	-	K;I	0DJ7Y;1CTZW;KOG1471;0V8T2;13JFG;0UHWX;09XVF;1B1RI	SEC14 like lipid binding 2 [Source:HGNC Symbol;Acc:HGNC:10699]	100358122	-
ENSOCUG00000002655	7.55377809	15.10755618	0	0	-Inf	0.033884455	0.953462644	1	92322379	92334381	+	1346	HEPACAM	GO:0005911;GO:0016020;GO:0016020;GO:0016021;GO:0030424;GO:0034613;	K23116	-	T	09XI6;0IFBM;1AVMY;12QJN;0UK5W;1CSK5;0DHVJ;0V8GA	hepatic and glial cell adhesion molecule [Source:HGNC Symbol;Acc:HGNC:26361]	100342176	G1SI07
ENSOCUG00000010280	2817.610942	1864.796559	3770.425325	2.021896333	1.015709029	0.034061795	0.953462644	X	67963782	67970209	+	593	PGRMC1	GO:0016020;GO:0016021;	-	-	H;S	13RBR;0DPI0;KOG1110;0VCRH;1B4NF;1CYGJ;0A1IB;0USVP	progesterone receptor membrane component 1 [Source:HGNC Symbol;Acc:HGNC:16090]	-	-
ENSOCUG00000015112	1993.85888	1561.027107	2426.690654	1.554547415	0.636494621	0.034150604	0.953462644	19	15491914	15510134	+	5185	CLUH	GO:0003723;GO:0003729;GO:0005515;GO:0005737;GO:0005737;GO:0007005;GO:0007005;GO:0048312;GO:0048312;GO:0048312;GO:0005515;GO:0048312;	K03255	-	S;O;V	09X86;1CXAS;0DR0G;0UU3H;0V7TK;KOG1839;12NVR;1ATKN	clustered mitochondria homolog [Source:HGNC Symbol;Acc:HGNC:29094]	100339929	-
ENSOCUG00000013406	742.4284865	325.7353747	1159.121598	3.558476261	1.831259612	0.034212162	0.953462644	12	140107577	140122532	-	5016	-	-	-	-	S	1D436;0DUSB;13XQM;0A7HD;0J4VC;1B66M;0UVSK;0VJ2E;1D436;0DUSB;13XQM;0A7HD;0J4VC;1B66M;0UVSK;0VJ2E	-	-	-
ENSOCUG00000017883	533.0460758	655.2596289	410.8325226	0.626976704	-0.673516255	0.034259517	0.953462644	14	75015585	75040892	+	1290	ACTL6A	GO:0001825;GO:0003407;GO:0003682;GO:0005634;GO:0005634;GO:0005654;GO:0005886;GO:0006338;GO:0006338;GO:0007399;GO:0016514;GO:0016514;GO:0031011;GO:0035267;GO:0043967;GO:0043968;GO:0071564;GO:0071564;	-	-	Z;B	09V50;0DGE5;0V64P;1CR3M;KOG0679;0UNE1;1AZMR;12N5N	actin like 6A [Source:HGNC Symbol;Acc:HGNC:24124]	100338581	G1TEN1
ENSOCUG00000004710	2079.266563	2567.070483	1591.462644	0.619952843	-0.689769614	0.034309818	0.953462644	1	20944145	21009634	+	3167	DDX58	GO:0003676;GO:0003676;GO:0005524;GO:0005524;GO:0008270;GO:0046872;GO:0002230;GO:0002735;GO:0003676;GO:0003676;GO:0003690;GO:0003725;GO:0003725;GO:0003727;GO:0003727;GO:0005524;GO:0005524;GO:0005737;GO:0005829;GO:0005886;GO:0005923;GO:0008270;GO:0008270;GO:0009597;GO:0009615;GO:0010628;GO:0015629;GO:0030334;GO:0031625;GO:0032587;GO:0032725;GO:0032727;GO:0032728;GO:0032728;GO:0032755;GO:0032757;GO:…	K12646	EC:3.6.4.13	A;K	1ATHZ;0V4TZ;KOG0354;0DQ4Z;12NQ7;0UTEU;1CZ68;09TUS	DExD/H-box helicase 58 [Source:HGNC Symbol;Acc:HGNC:19102]	100347707	-
ENSOCUG00000022990	70.95938727	46.37407496	95.54469959	2.060304161	1.042857337	0.034364395	0.953462644	1	79041952	79049783	-	951	-	GO:0007600;GO:0007600;GO:0045494;GO:0045494;	-	-	O	1B4DZ;13EEH;09WTS;0V6SP;1CSU4;0UKGF;0DI3S;KOG2501	-	-	-
ENSOCUG00000004636	1075.175638	1310.191995	840.1592818	0.641248981	-0.641043467	0.034406885	0.953462644	GL018749	1879131	1893045	+	680	-	GO:0007049;	-	-	S;U	1B5WC;0VICQ;1D3NE;KOG1766;0DUAT;0A7HY;0UVGW;13SMJ	-	100340961	G1TKN7
ENSOCUG00000005167	13.5284692	4.247719111	22.8092193	5.369756968	2.424856794	0.034548512	0.953462644	13	5950316	5963902	-	1548	ANGPTL1	GO:0005102;GO:0005615;GO:0007169;	-	-	S;T;E	0DH5X;1CRW5;13DWM;1AZ4R;0V6W2;0UJ7R;KOG2579;09VXJ	angiopoietin like 1 [Source:HGNC Symbol;Acc:HGNC:489]	100347829	G1SNB9
ENSOCUG00000031993	18.8480432	28.38029151	9.315794889	0.328248739	-1.607138628	0.034618183	0.953462644	12	147581015	147618012	+	726	-	GO:0000786;GO:0003677;GO:0046982;	-	-	-	-	-	-	-
ENSOCUG00000010133	262.0305869	174.9612625	349.0999114	1.99529831	0.996604455	0.034633065	0.953462644	14	51600968	51918476	-	5361	VEPH1	GO:0030512;GO:0060392;	K24027	-	T	09W8C;0V76S;KOG3723;12TNY;0DHHG;0UJPR;1AV6Q;1CS7R	ventricular zone expressed PH domain containing 1 [Source:HGNC Symbol;Acc:HGNC:25735]	100343227	G1SYM8
ENSOCUG00000003996	4143.847688	3280.947744	5006.747632	1.526006515	0.609761121	0.034665352	0.953462644	GL018803	920652	1015744	+	6964	KIDINS220	GO:0001701;GO:0005515;GO:0016020;GO:0016021;GO:0048813;GO:0005515;GO:0005515;GO:0005515;GO:0005515;	-	-	S;T;K;G;B	12QDD;09X88;1CTAD;0DIJQ;0UM4E;1B0RV;KOG0502;0V86U	kinase D interacting substrate 220 [Source:HGNC Symbol;Acc:HGNC:29508]	-	-
ENSOCUG00000009403	483.361296	373.695702	593.0268901	1.586924567	0.666233553	0.034668322	0.953462644	10	14154647	14155024	+	378	PRR15	-	-	-	S	0A7ZX;1B6C9;0J434;0UVKV;13WRH;0DUSD;1D412;0VIVH	proline rich 15 [Source:HGNC Symbol;Acc:HGNC:22310]	100358261	G1SX51
ENSOCUG00000002730	354.2866091	270.0297823	438.5434358	1.624055806	0.699601207	0.034715821	0.953462644	12	43721121	43813967	+	1408	LRRC1	GO:0005515;GO:0005829;GO:0005515;	-	-	S;T	0V0ZI;0KCZ0;0WCG7;0E5H1;14T4V;1DCH0;1B9X0;0AZZW	leucine rich repeat containing 1 [Source:HGNC Symbol;Acc:HGNC:14307]	100355945	-
ENSOCUG00000005295	1514.562351	1830.925852	1198.198851	0.654422379	-0.611706012	0.034728843	0.953462644	10	14935276	14993441	+	2509	GARS1	GO:0000166;GO:0004812;GO:0004820;GO:0005524;GO:0005737;GO:0006418;GO:0006426;GO:0000166;GO:0000166;GO:0004812;GO:0004812;GO:0004820;GO:0004820;GO:0005524;GO:0005524;GO:0005737;GO:0005737;GO:0006418;GO:0006418;GO:0006426;GO:0006426;GO:0000166;GO:0004081;GO:0004812;GO:0004820;GO:0004820;GO:0004820;GO:0005524;GO:0005737;GO:0005829;GO:0006418;GO:0006418;GO:0006426;GO:0006426;GO:0015966;GO:0030141;GO:…	K01880	EC:6.1.1.14	J	0UM0C;1B0GT;0DR81;0VEG7;12P5B;0A3M6;1D0DG;KOG2298	glycyl-tRNA synthetase 1 [Source:HGNC Symbol;Acc:HGNC:4162]	100338153	G1SNM1
ENSOCUG00000026297	372.6264669	248.6449037	496.60803	1.997258028	0.998020728	0.034754541	0.953462644	7	76530824	76532112	-	801	NXPH2	-	K16657	-	O;T	0A2DP;0DQ0Z;0UTBC;1CZ1I;0VD99;1AWWG;0INCH;12T4Y	neurexophilin 2 [Source:HGNC Symbol;Acc:HGNC:8076]	100353771	-
ENSOCUG00000013493	1359.166678	1051.138199	1667.195157	1.586085596	0.665470631	0.034785486	0.953462644	GL018735	2513413	2536658	-	2943	SLC7A1	GO:0006865;GO:0006865;GO:0016020;GO:0016020;GO:0016020;GO:0016021;GO:0016021;GO:0016021;GO:0022857;GO:0022857;GO:0055085;GO:0055085;GO:0006865;GO:0015181;GO:0015809;GO:0016020;GO:0016021;GO:0022857;GO:0032991;GO:0055085;	K13863	-	E	0V5II;09UJB;0UHNX;1CQRW;12QK9;0DG2D;1B0IU;KOG1286	solute carrier family 7 member 1 [Source:HGNC Symbol;Acc:HGNC:11057]	100341572	-
ENSOCUG00000032203	396.9122604	490.9401398	302.8843809	0.616947681	-0.696779945	0.034813047	0.953462644	1	190782545	190783129	+	360	SELENOH	-	-	-	-	-	selenoprotein H [Source:HGNC Symbol;Acc:HGNC:18251]	-	-
ENSOCUG00000033730	984.008933	651.6210961	1316.39677	2.020187464	1.014489175	0.034909011	0.954553798	GL018717	1779134	1861605	+	496	-	GO:0005515;GO:0005515;	-	-	-	-	-	-	-
ENSOCUG00000014015	759.3416734	934.184535	584.4988118	0.625678107	-0.67650747	0.035005721	0.955661797	5	14005009	14042634	+	4742	MMP15	GO:0004518;GO:0034477;GO:0000175;GO:0004222;GO:0004222;GO:0004518;GO:0004518;GO:0004518;GO:0005634;GO:0005887;GO:0005887;GO:0006508;GO:0006508;GO:0006508;GO:0008233;GO:0008237;GO:0008237;GO:0008237;GO:0008270;GO:0008270;GO:0016787;GO:0031012;GO:0031012;GO:0034477;GO:0034477;GO:0034477;GO:0035987;GO:0046872;GO:0090305;GO:0090503;GO:1990838;GO:0000175;GO:0004518;GO:0004518;GO:0004518;GO:0005634;GO:…	K23093	EC:3.1.4.-	A	13NN2;KOG3102;1CU9Y;1B2RS;0UM5C;0DJHH;0A2EH;0VDA4	matrix metallopeptidase 15 [Source:HGNC Symbol;Acc:HGNC:7161]	100347732	G1T0I8
ENSOCUG00000029301	86.77988097	113.2745998	60.28516217	0.532203709	-0.909949529	0.035082791	0.956230943	12	10501959	10507555	+	2149	ZSCAN23	GO:0003676;GO:0003676;GO:0003700;GO:0003700;GO:0005634;GO:0006355;GO:0006355;GO:0046872;	K09230	-	-	-	zinc finger and SCAN domain containing 23 [Source:HGNC Symbol;Acc:HGNC:21193]	108177401	-
ENSOCUG00000029328	292.773179	405.8847313	179.6616266	0.442641994	-1.175787768	0.035281004	0.957883403	GL018777	1158356	1172159	+	2312	OASL	GO:0003677;GO:0003723;GO:0003723;GO:0003725;GO:0003725;GO:0003725;GO:0005515;GO:0005524;GO:0005524;GO:0005654;GO:0005730;GO:0005737;GO:0005829;GO:0006955;GO:0006955;GO:0009615;GO:0016740;GO:0016740;GO:0045071;GO:0051607;GO:0051607;GO:0051607;GO:0003723;GO:0003725;GO:0005515;GO:0005524;GO:0006955;GO:0016740;GO:0051607;	K14608	-	-	-	2'-5'-oligoadenylate synthetase like [Source:HGNC Symbol;Acc:HGNC:8090]	100356242	-
ENSOCUG00000003573	488.4193354	612.0580627	364.780608	0.595990201	-0.746639483	0.03538311	0.957883403	GL019252	29397	52261	-	4965	TTYH3	GO:0005254;GO:0005886;GO:0006811;GO:0006821;GO:0016020;GO:0016021;GO:0016021;GO:0016021;GO:0034707;GO:1902476;GO:0005254;GO:0005886;GO:0006811;GO:0006821;GO:0016020;GO:0016021;GO:0016021;GO:0016021;GO:0034707;GO:1902476;GO:0016021;GO:0016021;GO:0005229;GO:0005254;GO:0005886;GO:0006821;GO:0016021;GO:0016021;GO:0016021;	-	-	P;U	0DEJQ;KOG4433;09T8H;1ATJR;0UI06;12TKA;0V47G;1CP9M	tweety family member 3 [Source:HGNC Symbol;Acc:HGNC:22222]	-	-
ENSOCUG00000013530	32.56839775	46.91889157	18.21790394	0.388285045	-1.364811952	0.035389267	0.957883403	12	141516128	141614965	+	1944	CCDC170	-	-	-	S	0VCZ1;0DPRQ;131R4;0IG1D;0UHW5;09WDF;1B4ZA;1CZ9E	coiled-coil domain containing 170 [Source:HGNC Symbol;Acc:HGNC:21177]	-	-
ENSOCUG00000023342	566.570636	694.045984	439.0952879	0.632660224	-0.660497199	0.035390693	0.957883403	GL019006	131895	140643	-	2789	RTN2	GO:0005783;GO:0005783;GO:0005789;GO:0014802;GO:0016020;GO:0016021;GO:0030315;GO:0046324;GO:0065002;	K20722	-	U	09T8Z;13KAQ;0UFJ5;0V47Z;1ATCZ;0DEK5;KOG1792;1CPA3	reticulon 2 [Source:HGNC Symbol;Acc:HGNC:10468]	100346941	G1U2E7
ENSOCUG00000022624	8.734834016	16.14549804	1.324169991	0.082014812	-3.607971699	0.035425015	0.957883403	16	66322764	66341513	+	2601	SLC26A9	GO:0005254;GO:0005254;GO:0005254;GO:0006811;GO:0006811;GO:0006820;GO:0006821;GO:0006821;GO:0006821;GO:0008271;GO:0008271;GO:0008271;GO:0008272;GO:0008272;GO:0009986;GO:0010628;GO:0015116;GO:0015116;GO:0015301;GO:0015301;GO:0015301;GO:0015701;GO:0015701;GO:0015701;GO:0016020;GO:0016020;GO:0016020;GO:0016021;GO:0016021;GO:0016021;GO:0016324;GO:0051117;GO:0055085;GO:0055085;GO:0098656;GO:1902358;GO:…	K14706	-	P	1CUXQ;0V5WY;09UX5;0UJFJ;0DG6J;1AYJ5;12Q5P;KOG0236	solute carrier family 26 member 9 [Source:HGNC Symbol;Acc:HGNC:14469]	100346998	G1TX36
ENSOCUG00000007785	3303.232759	2562.475029	4043.990489	1.578158009	0.658241659	0.035574625	0.960401938	2	139345990	139385438	+	1820	-	GO:0005509;GO:0005509;GO:0005509;GO:0005509;	K20364	-	S	0UV1N;13RCK;0VD4S;1D319;0A28Z;0DUI3;1B5JR;KOG4065	-	100353154	G1STS4
ENSOCUG00000009145	221.8245292	278.8984544	164.750604	0.590718956	-0.759456185	0.035738555	0.961923508	14	97169275	97228507	+	2363	IQCB1	GO:0001750;GO:0005515;GO:0005516;GO:0005516;GO:0005516;GO:0005654;GO:0005813;GO:0015630;GO:0019899;GO:0032391;GO:0032391;GO:0045171;GO:0045494;GO:0048496;GO:0060271;GO:0060271;GO:0060271;GO:0072686;GO:0005515;GO:0005516;GO:0060271;	K16774	-	Z	09X34;0DIE2;0V81J;1CT4M;0URU9;13J6B;KOG0160;1B1V0	IQ motif containing B1 [Source:HGNC Symbol;Acc:HGNC:28949]	100339750	G1SWM5
ENSOCUG00000011117	4434.338028	5410.730428	3457.945627	0.639090354	-0.645908181	0.035784555	0.961923508	3	52619509	52633246	+	1361	-	GO:0003676;GO:0003676;GO:0003676;	K11276	-	S;F;K	0A27Q;0VD3M;1AV7G;0DPVW;12V0J;0IHZM;0UT0V;1CYVD	-	103344935	-
ENSOCUG00000006673	124.1412249	90.50608919	157.7763606	1.743267906	0.8017943	0.035800657	0.961923508	GL018734	37874	38920	+	1047	A4GALT	GO:0007009;GO:0008378;GO:0016020;GO:0016020;GO:0016021;	K01988	EC:2.4.1.228	G	0VFCD;KOG1928;13Q06;0DNK6;0A0YW;1AUCR;0URXD;1CXHA	alpha 1,4-galactosyltransferase (P blood group) [Source:HGNC Symbol;Acc:HGNC:18149]	100347783	G1SRH2
ENSOCUG00000013313	7728.950003	6033.648199	9424.251806	1.561949172	0.643347507	0.035883631	0.962632164	17	27079370	27113963	+	1674	SLC30A4	GO:0005737;GO:0005770;GO:0006812;GO:0006812;GO:0008324;GO:0008324;GO:0009636;GO:0016020;GO:0016021;GO:0016021;GO:0016021;GO:0055069;GO:0055085;GO:0055085;GO:0061088;GO:0098655;	K14691	-	P	0A03V;KOG1482;0VB04;0DMPH;1CWJ4;13CZU;1ASYR;0UQWQ	solute carrier family 30 member 4 [Source:HGNC Symbol;Acc:HGNC:11015]	100358373	G1T556
ENSOCUG00000017317	2603.830372	1892.895858	3314.764886	1.751160727	0.808311505	0.036298821	0.97036141	16	20131376	20462928	+	7038	CDC42BPA	GO:0000287;GO:0004672;GO:0004674;GO:0004674;GO:0005524;GO:0005524;GO:0006468;GO:0006468;GO:0016477;GO:0030036;GO:0031032;GO:0031532;GO:0035556;GO:0042641;GO:0042802;GO:0004672;GO:0004674;GO:0005524;GO:0006468;GO:0030036;GO:0035556;GO:0004672;GO:0004674;GO:0005524;GO:0006468;GO:0030036;GO:0035556;GO:0004672;GO:0004674;GO:0005524;GO:0006468;GO:0030036;GO:0035556;GO:0004672;GO:0004674;GO:0005524;GO:…	-	-	T	0UK7E;09XUE;KOG0612;12SJ6;0DKPY;1AVPW;0V8S4;1CVIF	CDC42 binding protein kinase alpha [Source:HGNC Symbol;Acc:HGNC:1737]	100342314	-
ENSOCUG00000007315	225.8995443	284.0633779	167.7357106	0.590486925	-0.760022979	0.03634181	0.97036141	7	39487889	39514111	+	2360	ARMC10	GO:0005515;GO:0005515;GO:0005515;GO:0005739;GO:0005783;GO:0005515;GO:0005515;GO:0005515;	-	-	S	0DF0P;13M8U;0V4PM;1B15Y;0UG4T;0IVCU;09TQD;1CPQF	armadillo repeat containing 10 [Source:HGNC Symbol;Acc:HGNC:21706]	-	-
ENSOCUG00000009996	64.74699766	39.50017195	89.99382337	2.278314724	1.187967053	0.03634291	0.97036141	5	22776733	22778423	+	1125	-	GO:0005515;	K10274	-	S	1AS8I;1CWTD;0DMXJ;13NEU;0UMZW;0VB6T;0A0AR;0IKPE	-	100354023	G1SYC3
ENSOCUG00000011954	1931.060173	1460.938751	2401.181594	1.643588133	0.716848819	0.036420223	0.970577754	1	18503456	18766294	-	17429	-	GO:0005509;GO:0005509;GO:0005543;GO:0005543;GO:0007268;GO:0007268;GO:0019992;GO:0019992;GO:0035556;GO:0035556;GO:0045202;GO:0046872;GO:0005509;GO:0005543;GO:0007268;GO:0019992;GO:0035556;GO:0005509;GO:0005543;GO:0007268;GO:0019992;GO:0035556;GO:0005509;GO:0005543;GO:0007268;GO:0019992;GO:0035556;GO:0005509;GO:0005543;GO:0007268;GO:0019992;GO:0035556;GO:0005509;GO:0005543;GO:0007268;GO:0019992;GO:…	K15293	-	T;U	09YIK;0DMR5;KOG1011;0UPR1;1ATRE;12SKK;1CWKR;0V9P0	-	100345810	-
ENSOCUG00000024604	33.7414907	47.00010913	20.48287228	0.435804781	-1.19824607	0.036525181	0.970577754	4	53489961	53491208	+	1248	-	GO:0003676;GO:0003676;GO:0003723;	K12898	-	A	KOG4211	-	100345155	G1U3W7
ENSOCUG00000004703	482.5776372	370.1187673	595.0365071	1.607690719	0.684989893	0.036550279	0.970577754	13	125405730	125591336	+	4883	SCMH1	GO:0005515;GO:0005634;GO:0005634;GO:0006355;GO:0006355;GO:0005634;GO:0005634;GO:0006338;GO:0006355;GO:0007283;GO:0009952;GO:0010369;GO:0005515;GO:0005634;GO:0006355;GO:0005515;GO:0005634;GO:0006355;GO:0005515;GO:0005634;GO:0006355;GO:0005515;GO:0005634;GO:0006355;	K11461	-	K	1BAM4;1DEFT;0IMEZ;0E7ET;13AR5;0B31G;0WFCT;0V2M9	Scm polycomb group protein homolog 1 [Source:HGNC Symbol;Acc:HGNC:19003]	100358694	-
ENSOCUG00000007162	7968.364958	6192.193908	9744.536008	1.573680694	0.654142842	0.036612863	0.970577754	11	15521977	15587745	-	1923	ELL2	GO:0005654;GO:0006368;GO:0006368;GO:0008023;GO:0008023;GO:0008023;GO:0042795;	K15183	-	K	0UN8I;0DJM0;KOG4796;1B2VD;1CUDU;0V93M;13FCK;09Y7I	elongation factor for RNA polymerase II 2 [Source:HGNC Symbol;Acc:HGNC:17064]	100351751	-
ENSOCUG00000012241	71.14236391	93.73491747	48.54981035	0.517947971	-0.949120911	0.036636343	0.970577754	GL018955	227	9218	-	1831	-	GO:0008154;GO:0008154;GO:0045010;GO:0045010;GO:0008154;GO:0045010;	-	-	T	KOG4590;0UR77;1CW0V;0DM5R;0VAIQ;12TVS;09ZN1;1B1ZB	-	-	-
ENSOCUG00000010855	1780.841474	2164.001412	1397.681537	0.645878292	-0.630665762	0.036693498	0.970580111	X	87988929	87991674	-	591	-	GO:0003735;GO:0005840;GO:0006412;GO:0003735;GO:0003735;GO:0005840;GO:0005840;GO:0005840;GO:0006412;GO:0006412;	K02929	-	J	0UVH9;13SY1;KOG3464;0VID2;0DUB9;1D3NT;0A7ID	-	100353469	G1U344
ENSOCUG00000015162	303.1686427	200.4034996	405.9337858	2.025582321	1.018336718	0.036871704	0.973779424	GL018817	320282	322659	+	1056	MFAP4	GO:0001527;GO:0005576;GO:0009650;GO:0010712;GO:0048251;GO:0062023;GO:0071493;GO:0071953;GO:0097435;	-	-	-	-	microfibril associated protein 4 [Source:HGNC Symbol;Acc:HGNC:7035]	100340031	G1T8V2
ENSOCUG00000030001	510.6659268	666.2856721	355.0461816	0.532873805	-0.908134179	0.037041145	0.976525815	GL019589	3110	9122	+	964	PMEPA1	GO:0010991;GO:0030512;GO:0070412;GO:0000139;GO:0010008;GO:0010991;GO:0010991;GO:0030512;GO:0030512;GO:0031901;GO:0043231;GO:0050699;GO:0060394;GO:0070412;GO:0070412;	-	-	-	-	prostate transmembrane protein, androgen induced 1 [Source:HGNC Symbol;Acc:HGNC:14107]	-	-
ENSOCUG00000006500	357.7659466	189.7377994	525.7940937	2.771161546	1.470490816	0.037090527	0.976525815	15	78490760	78947960	-	4323	SLC4A4	GO:0005452;GO:0006820;GO:0008509;GO:0016020;GO:0016021;GO:0005452;GO:0006820;GO:0008509;GO:0016020;GO:0016021;GO:0005452;GO:0006820;GO:0008509;GO:0016020;GO:0016021;GO:0005452;GO:0006820;GO:0008509;GO:0016020;GO:0016021;GO:0005452;GO:0005452;GO:0006811;GO:0006820;GO:0006820;GO:0008509;GO:0008509;GO:0015698;GO:0016020;GO:0016020;GO:0016020;GO:0016021;GO:0016021;GO:0016021;GO:0098656;GO:0005452;GO:…	K13575	-	-	-	solute carrier family 4 member 4 [Source:HGNC Symbol;Acc:HGNC:11030]	100008727	Q9XSZ4
ENSOCUG00000016764	4.506157186	8.350229377	0.662084995	0.079289438	-3.656727488	0.037200892	0.977691045	GL018837	584023	731135	+	4042	MYT1L	GO:0003700;GO:0003700;GO:0005634;GO:0005634;GO:0006355;GO:0006355;GO:0008270;GO:0008270;GO:0003700;GO:0005634;GO:0006355;GO:0008270;GO:0000122;GO:0001227;GO:0003700;GO:0003700;GO:0005634;GO:0005634;GO:0006355;GO:0006357;GO:0007399;GO:0008270;GO:0030182;GO:0048663;GO:0048665;GO:0048666;GO:0003700;GO:0003700;GO:0005634;GO:0005634;GO:0006355;GO:0006355;GO:0008270;GO:0008270;GO:0003700;GO:0005634;GO:…	K23193	-	K	0DIBP;0V98C;09YAW;KOG3803;13FU7;1AZ8P;1CUHG;0UPKV	myelin transcription factor 1 like [Source:HGNC Symbol;Acc:HGNC:7623]	100338864	-
ENSOCUG00000002428	329.5158426	231.2038348	427.8278504	1.850435789	0.887865074	0.037276541	0.977691045	2	113172337	113177925	+	2128	PRADC1	GO:0005576;	-	-	S	0UQ1F;13JM5;0VADJ;1CVTY;09ZGG;0DKZ4;KOG3920;1AWZ5	protease associated domain containing 1 [Source:HGNC Symbol;Acc:HGNC:16047]	-	-
ENSOCUG00000039673	14.3358379	6.454835337	22.21684046	3.441891125	1.783201462	0.037307237	0.977691045	GL019541	29674	40494	-	1918	-	GO:0009190;GO:0016849;GO:0035556;GO:0009190;GO:0016849;GO:0035556;GO:0009190;GO:0016849;GO:0035556;	-	-	-	-	-	-	-
ENSOCUG00000014367	12374.83472	6333.901799	18415.76763	2.907491815	1.53977513	0.037448188	0.979875061	12	124622537	124761211	-	2948	SGK1	GO:0004672;GO:0004674;GO:0005524;GO:0006468;GO:0035091;GO:0004672;GO:0004672;GO:0004674;GO:0004712;GO:0005524;GO:0005829;GO:0006468;GO:0006468;GO:0006974;GO:0016607;GO:0035091;GO:0004672;GO:0004674;GO:0005524;GO:0006468;GO:0000166;GO:0004672;GO:0004672;GO:0004674;GO:0004674;GO:0004674;GO:0005524;GO:0005524;GO:0005524;GO:0005634;GO:0005737;GO:0005739;GO:0005783;GO:0005789;GO:0005886;GO:0006468;GO:…	K13302	EC:2.7.11.1	-	-	Serine/threonine-protein kinase Sgk1 [Source:UniProtKB/Swiss-Prot;Acc:Q9XT18]	100008723	Q9XT18
ENSOCUG00000024119	30.72064271	43.56847565	17.87280977	0.410223436	-1.285518181	0.037599332	0.980777061	8	101038051	101237438	-	984	GPR183	GO:0002250;GO:0002313;GO:0002407;GO:0004930;GO:0004930;GO:0004930;GO:0004930;GO:0005886;GO:0006959;GO:0007165;GO:0007186;GO:0007186;GO:0007186;GO:0007186;GO:0008142;GO:0008142;GO:0010818;GO:0016020;GO:0016021;GO:0016021;GO:0016021;GO:0030316;GO:0030595;GO:0030595;GO:0030890;GO:0030890;GO:0036145;GO:0060326;GO:0061470;GO:0070374;GO:2000458;	-	-	T	0V6U6;0IEQQ;0UJ4X;0DH3P;1B0ZP;09VVJ;1CRTW;13E09	G protein-coupled receptor 183 [Source:HGNC Symbol;Acc:HGNC:3128]	-	-
ENSOCUG00000004093	101.5368427	130.8776824	72.19600304	0.551629596	-0.858228233	0.037627718	0.980777061	8	2552673	2583990	+	2748	PUS7L	GO:0001522;GO:0001522;GO:0003723;GO:0003723;GO:0009451;GO:0009451;GO:0009982;GO:0009982;	K06176	EC:5.4.99.27	S;T;K	KOG2339;0UQNB;1CY77;09YVX;0DID3;0VEQU;12N52;1ASRJ	pseudouridine synthase 7 like [Source:HGNC Symbol;Acc:HGNC:25276]	100350002	G1SL20
ENSOCUG00000024398	530.5870922	651.2362923	409.9378921	0.629476423	-0.667775751	0.037662633	0.980777061	GL018729	15201	46869	+	1930	-	GO:0005515;GO:0005515;GO:0005515;	K05131	-	T	0IHB9;1AVUW;0A4UV;0UM1K;0V8YW;0DIHJ;13N46;1CT80	-	100338097	-
ENSOCUG00000002636	436.535382	336.8953501	536.1754139	1.591519188	0.67040455	0.037751403	0.980777061	15	12753977	12970420	-	3792	FAM160A1	-	-	-	S;I	KOG3695;0UMGM;1ARJZ;0DIUY;0V8FH;09XHF;1CTK9;12S9X	family with sequence similarity 160 member A1 [Source:HGNC Symbol;Acc:HGNC:34237]	100353364	-
ENSOCUG00000007797	13.49685591	6.025611014	20.96810081	3.479829806	1.799016748	0.037819387	0.980777061	1	147270738	147284108	+	4463	CCKBR	GO:0001696;GO:0004930;GO:0004930;GO:0004930;GO:0004951;GO:0005623;GO:0007165;GO:0007186;GO:0007186;GO:0007186;GO:0007200;GO:0007204;GO:0008284;GO:0015054;GO:0015054;GO:0015054;GO:0016020;GO:0016020;GO:0016021;GO:0016021;GO:0016021;GO:0017046;GO:0031741;GO:0038188;GO:0045851;GO:0048565;GO:0048732;GO:0004930;GO:0007186;GO:0015054;GO:0016021;	K04195	-	T	KOG3656;0DKXD;0VBAF;1CWX9;1AYVX;0UJFM;12Q94;0A0E7	Oryctolagus cuniculus cholecystokinin B receptor (CCKBR), mRNA. [Source:RefSeq mRNA;Acc:NM_001171123]	100328939	G1STT9
ENSOCUG00000007643	139.3192346	103.1759269	175.4625423	1.70061513	0.766056678	0.037828654	0.980777061	2	36651281	36669045	+	2248	NIPAL1	GO:0015095;GO:0015095;GO:0015693;GO:0015693;GO:0016020;GO:0016021;GO:0016021;GO:0016021;GO:1903830;	K22733	-	S;P;G	0DEUR;0UHK0;1CV5X;KOG2922;1ARM1;0V4GY;12QHV;09TI0	NIPA like domain containing 1 [Source:HGNC Symbol;Acc:HGNC:27194]	100356860	-
ENSOCUG00000021680	163.0195032	203.5503452	122.4886612	0.601761009	-0.732737463	0.037978337	0.982780493	14	70812	98645	-	1517	-	GO:0016787;GO:0016787;GO:0016787;GO:0016787;GO:0016787;GO:0016787;GO:0016787;	K16855	-	L	0IYGP;0UH2D;1B39S;1CQCH;09UD7;13UBP;0V5CJ;0DFP1;0IYGP;0UH2D;1B39S;1CQCH;09UD7;13UBP;0V5CJ;0DFP1	-	100338916	G1TIE0
ENSOCUG00000016757	235.1547555	177.9643245	292.3451866	1.64271793	0.716084777	0.038021494	0.982780493	1	108091218	108101351	+	5463	EXPH5	GO:0003334;GO:0005768;GO:0006886;GO:0017137;GO:0017137;GO:0045921;GO:0050714;GO:0071985;	K22236	-	U	0DKFX;13KRE;1CV9X;1AZ18;0V9Y7;0UI9N;09V29;0IEGS	exophilin 5 [Source:HGNC Symbol;Acc:HGNC:30578]	100345300	G1TCB3
ENSOCUG00000003503	348.7990806	115.3385601	582.2596012	5.048264873	2.335787608	0.038334115	0.988144782	1	145768484	145774033	+	1754	MMP26	GO:0004222;GO:0004222;GO:0006508;GO:0006508;GO:0006508;GO:0008233;GO:0008237;GO:0008237;GO:0008237;GO:0008270;GO:0008270;GO:0016787;GO:0031012;GO:0031012;GO:0046872;GO:0050728;	K08004	EC:3.4.24.-	O;W	KOG1565;1B7FB;0A55H;0VG0W;12NBV;0UUMC;0DRKU;1D1VE	matrix metallopeptidase 26 [Source:HGNC Symbol;Acc:HGNC:14249]	103350834	-
ENSOCUG00000002720	1155.49821	879.5986613	1431.397758	1.627330533	0.702507312	0.038345223	0.988144782	16	954101	1105970	-	6173	ARHGAP21	GO:0005515;GO:0005794;GO:0005886;GO:0007030;GO:0007165;GO:0015629;GO:0030054;GO:0051683;GO:0051684;GO:0072384;GO:0005096;GO:0005515;GO:0007165;GO:0007165;GO:0043547;GO:0005515;GO:0007165;GO:0005515;GO:0007165;GO:0007165;	K20315	-	T	14T7Q;1B9Y0;0E5J7;1DCJ4;0V116;0KD1S;0WCIX;0B02C	Rho GTPase activating protein 21 [Source:HGNC Symbol;Acc:HGNC:23725]	100338000	-
ENSOCUG00000039017	239.345467	180.0304782	298.6604558	1.658943856	0.730265062	0.038684667	0.993965531	GL018765	814056	816961	+	970	METTL27	GO:0008168;GO:0008168;	-	-	Q;L	1CXPK;0UPX5;0VC0F;KOG1541;13SAV;0A147;1B257;0DNS7	methyltransferase like 27 [Source:HGNC Symbol;Acc:HGNC:19068]	-	-
ENSOCUG00000022870	3.474993434	0.338186451	6.611800418	19.55075492	4.28915241	0.038759335	0.993965531	GL018968	205212	208746	+	1283	NTN3	GO:0005102;GO:0005515;GO:0005576;GO:0005576;GO:0005794;	-	-	W	0UHQE;0DIFR;09X39;1CT6F;KOG3512;0V81Q;1ATAT;12SNA	netrin 3 [Source:HGNC Symbol;Acc:HGNC:8030]	-	-
ENSOCUG00000033356	115.1501109	83.59856194	146.7016598	1.754834729	0.811335163	0.038784663	0.993965531	GL019599	34583	40654	+	2215	-	GO:0008093;GO:0032956;	-	-	-	-	-	-	-
ENSOCUG00000023336	264.6487629	89.93539791	439.3621279	4.8853081	2.288449551	0.038839113	0.993965531	AAGW02082163	8314	10156	-	1024	-	-	-	-	S	1D436;0DUSB;13XQM;0A7HD;0J4VC;1B66M;0UVSK;0VJ2E	-	-	-
ENSOCUG00000010890	8.682911694	1.557621737	15.80820165	10.14893493	3.343256428	0.038863304	0.993965531	GL018767	736931	740597	+	927	-	GO:0016020;GO:0016021;GO:0030246;	K06563	-	T;V	13EPS;0IS3Z;0B5FI;0WI2U	-	100338696	G1T070
ENSOCUG00000005708	982362.5684	353837.3731	1610887.764	4.552621871	2.186697638	0.039028641	0.996669401	2	45945603	45954814	+	744	STC1	GO:0001886;GO:0003421;GO:0005179;GO:0005179;GO:0005576;GO:0005576;GO:0005615;GO:0005623;GO:0005634;GO:0005737;GO:0006874;GO:0007165;GO:0010596;GO:0030336;GO:0035988;GO:0044070;GO:0051926;GO:0060348;GO:0086004;GO:0090280;GO:1903403;	-	-	W	0IH10;0DFCH;0V51T;1CQ27;0UFM4;12T5C;09U2T;1AW88	stanniocalcin 1 [Source:HGNC Symbol;Acc:HGNC:11373]	100353589	G1SPH2
ENSOCUG00000013158	373.4566892	460.0373511	286.8760273	0.623592903	-0.681323586	0.039086224	0.996669401	7	62139289	62143997	+	861	HS6ST1	GO:0001525;GO:0005654;GO:0008146;GO:0008146;GO:0015012;GO:0015015;GO:0016020;GO:0016021;GO:0016021;GO:0016607;GO:0016740;GO:0017095;GO:0048286;GO:0048666;GO:0060716;	K02514	EC:2.8.2.-	O	KOG3955;0V4PS;1AU88;1CRNG;0DGY7;09TQI;12NBK;0UN3G	heparan sulfate 6-O-sulfotransferase 1 [Source:HGNC Symbol;Acc:HGNC:5201]	100340145	-
ENSOCUG00000014406	798.2698124	586.8061177	1009.733507	1.720727642	0.783018764	0.039329749	0.99894679	GL018719	3594625	3697685	-	1842	-	GO:0003677;GO:0003700;GO:0003700;GO:0005634;GO:0006355;GO:0006355;GO:0043565;GO:0043565;	-	-	K	13DZ1;0UMG7;0DIKR;1B1HP;1CZHR;09XVH;0VE27;KOG2294	-	-	-
ENSOCUG00000009239	104.7495767	132.4104332	77.08872027	0.582195212	-0.780425119	0.039330481	0.99894679	GL019102	9395	13224	-	471	NUDT1	GO:0003924;GO:0005634;GO:0005737;GO:0005739;GO:0005759;GO:0005829;GO:0006195;GO:0006203;GO:0006281;GO:0006281;GO:0008413;GO:0008413;GO:0008413;GO:0016787;GO:0016787;GO:0016787;GO:0035539;GO:0036219;GO:0042262;GO:0046061;GO:0047693;	K17816	-	L	0VHMI;0US5Z;1B5RP;13PW8;1CZY5;0DQUE;0IXIA;0A6TK	nudix hydrolase 1 [Source:HGNC Symbol;Acc:HGNC:8048]	100348373	-
ENSOCUG00000021808	1371.705524	917.5565385	1825.85451	1.989909541	0.992702849	0.039351737	0.99894679	GL018746	61694	72016	-	961	TMED3	GO:0005783;GO:0005793;GO:0005794;GO:0016020;GO:0016021;GO:0016020;GO:0016021;	K20350	-	U	0V6XJ;0UN65;1B46K;12RUE;09VZ6;0DH7Y;KOG1693;1CRY2	transmembrane p24 trafficking protein 3 [Source:HGNC Symbol;Acc:HGNC:28889]	100339858	-
ENSOCUG00000010130	117.0375261	86.47988269	147.5951695	1.706699464	0.771209034	0.039806538	1	8	32381075	32400089	+	2529	PLEKHG6	GO:0005085;GO:0005089;GO:0005096;GO:0005813;GO:0030054;GO:0035023;GO:0043547;	K23861	-	T	1CVE8;09TXP;0V4WQ;1AZ3N;KOG3521;0UT4X;0DF7Z;12NF7	pleckstrin homology and RhoGEF domain containing G6 [Source:HGNC Symbol;Acc:HGNC:25562]	100356109	G1SYN0
ENSOCUG00000008285	29.47858798	17.79215744	41.16501851	2.313660873	1.210177415	0.039843126	1	13	93666098	94607110	+	1129	NEGR1	GO:0005886;GO:0007626;GO:0007631;GO:0010976;GO:0098609;	K06775	-	T	0B06E;1DCNG;14TBS;1BA05;0E5NI;0KD5Q;0V141;0WCNY	neuronal growth regulator 1 [Source:HGNC Symbol;Acc:HGNC:17302]	100350266	-
ENSOCUG00000004163	476.9989757	368.5281037	585.4698477	1.588670828	0.66782023	0.039915434	1	13	140619120	140644329	-	909	SLC25A33	GO:0000002;GO:0002082;GO:0006390;GO:0006864;GO:0007005;GO:0008284;GO:0015218;GO:0016020;GO:0016021;GO:0030307;GO:0030307;GO:0031930;GO:0031966;GO:0032869;GO:0034551;GO:0051881;GO:0071156;GO:1903426;GO:1990314;GO:1990519;GO:1990519;	K15116	-	C	0UJHG;09TH2;0DETV;1ARVI;KOG0757;1CPHM;0V4G2;12TC8	solute carrier family 25 member 33 [Source:HGNC Symbol;Acc:HGNC:29681]	100357242	-
ENSOCUG00000000664	3.711530323	7.007135716	0.415924929	0.059357339	-4.074429775	0.039943349	1	17	28072544	28449515	+	1773	FRMD5	GO:0005856;GO:0008092;GO:0005178;GO:0005856;GO:0005856;GO:0005912;GO:0008092;GO:0016020;GO:0016021;GO:0019901;GO:0030334;GO:0045785;GO:2000146;GO:0005856;GO:0005856;	K23969	-	S	1AXM9;0V6MD;09VND;0USJY;12RW1;0DGWU;1CRM2;KOG3530	FERM domain containing 5 [Source:HGNC Symbol;Acc:HGNC:28214]	100355318	-
ENSOCUG00000012451	784.5615663	608.2029686	960.920164	1.579933367	0.659863715	0.040091969	1	2	99035949	99117199	+	3250	EIF2AK3	GO:0001503;GO:0001525;GO:0004672;GO:0004672;GO:0004694;GO:0005515;GO:0005524;GO:0005524;GO:0006468;GO:0006468;GO:0006983;GO:0010575;GO:0010628;GO:0019899;GO:0019903;GO:0030968;GO:0031018;GO:0034198;GO:0034976;GO:0036492;GO:0042149;GO:0042802;GO:0045943;GO:0046777;GO:0051260;GO:0070417;GO:1902235;GO:0004672;GO:0005524;GO:0006468;	-	-	T	0ISBP	eukaryotic translation initiation factor 2 alpha kinase 3 [Source:HGNC Symbol;Acc:HGNC:3255]	100354847	-
ENSOCUG00000003764	556.7966752	705.7209504	407.8724	0.577951384	-0.790979953	0.040241295	1	13	75304421	75560921	-	6295	-	GO:0003924;GO:0005525;GO:0003924;GO:0005525;GO:0003924;GO:0005525;GO:0003924;GO:0005525;GO:0000166;GO:0003924;GO:0003924;GO:0005525;GO:0005525;GO:0005525;GO:0003924;GO:0005525;GO:0000166;GO:0003924;GO:0003924;GO:0005525;GO:0005525;GO:0005525;GO:0003924;GO:0005525;GO:0003924;GO:0005525;GO:0003924;GO:0005525;	K20899	-	S;O;T;D;C;K	0V9BC;134KU;09XSJ;1AYRV;KOG2037;1CUKV;0UNNF;0DJTQ;0V9BC;134KU;09XSJ;1AYRV;KOG2037;1CUKV;0UNNF;0DJTQ	-	100347754	G1SKC9
ENSOCUG00000015456	125.6095442	78.97378927	172.245299	2.18104387	1.125018789	0.040279928	1	13	99202053	99254401	+	2474	SLC35D1	GO:0016020;GO:0016021;GO:0005783;GO:0015165;GO:0016020;GO:0016021;GO:0030206;GO:0048706;GO:0090481;	-	-	P;G	1CSAY;09WB8;12PU4;0UP1Y;KOG1444;0V79I;0DHKI;1B05B	solute carrier family 35 member D1 [Source:HGNC Symbol;Acc:HGNC:20800]	-	-
ENSOCUG00000025119	39.17017153	54.09953244	24.24081061	0.448078006	-1.158178182	0.040338212	1	1	143097455	143103195	-	1441	RELT	GO:0005515;GO:0005654;GO:0006915;GO:0097186;GO:0005515;GO:0016020;GO:0016021;	K05156	-	T	1AU4V;0DHHY;13KSE;09XX0;0IKJV;1CS86;0UJQB;0V5NR	RELT TNF receptor [Source:HGNC Symbol;Acc:HGNC:13764]	100357800	G1TSH0
ENSOCUG00000017362	43.37153382	59.38177531	27.36129232	0.460769187	-1.117883853	0.040429605	1	GL018743	802003	871618	+	2210	NETO2	GO:0005515;GO:0014069;GO:0016020;GO:0016021;GO:0035255;GO:0045202;GO:2000312;GO:2000312;	-	-	-	-	neuropilin and tolloid like 2 [Source:HGNC Symbol;Acc:HGNC:14644]	100349959	G1TDJ7
ENSOCUG00000022383	348.8925064	266.300262	431.4847509	1.620294128	0.696255726	0.040481944	1	3	114655761	114663192	+	1630	OSR2	GO:0000122;GO:0000977;GO:0001228;GO:0001656;GO:0001823;GO:0002062;GO:0003676;GO:0003676;GO:0005634;GO:0008284;GO:0009792;GO:0010628;GO:0030154;GO:0030501;GO:0033687;GO:0035115;GO:0035116;GO:0036023;GO:0042474;GO:0042476;GO:0042733;GO:0043565;GO:0045893;GO:0045944;GO:0048704;GO:0050679;GO:0060021;GO:0060272;GO:0060322;GO:0060349;GO:0061029;GO:0072498;	K09215	-	K	0V4EH;1CPG6;12SBE;KOG1721;09TFE;0DESF;1B2TR;0UQJX	odd-skipped related transciption factor 2 [Source:HGNC Symbol;Acc:HGNC:15830]	100339888	-
ENSOCUG00000016288	18316.9555	14350.27358	22283.63742	1.552837115	0.634906506	0.040499808	1	4	83093902	83110802	+	3441	HSP90B1	GO:0005524;GO:0006457;GO:0051082;GO:0005524;GO:0006457;GO:0051082;GO:0001666;GO:0003723;GO:0005524;GO:0005524;GO:0005783;GO:0005788;GO:0005789;GO:0005829;GO:0006457;GO:0006457;GO:0019903;GO:0030433;GO:0030496;GO:0030970;GO:0031247;GO:0032991;GO:0043066;GO:0043666;GO:0048471;GO:0050750;GO:0051082;GO:0051082;GO:0071318;	K09487	-	O	0DIBJ;0UKSU;1CT22;12NT4;1AYHG;KOG0020;0V7Z3;09X0X	heat shock protein 90 beta family member 1 [Source:HGNC Symbol;Acc:HGNC:12028]	100009456	-
ENSOCUG00000009088	592.0152545	459.6589015	724.3716076	1.575889437	0.65616632	0.040509856	1	10	38453126	38461654	-	1159	-	GO:0005768;GO:0005886;GO:0016020;GO:0016021;	K14737	EC:1.16.1.-	P;U	0VDBX;1D0B8;1B0VF;0DN7T;0IEI2;12TDI;0UG0U;0A3JA	Oryctolagus cuniculus STEAP family member 1 (STEAP1), mRNA. [Source:RefSeq mRNA;Acc:NM_001171274]	100328630	B6A7P8
ENSOCUG00000036274	351.3161348	269.036542	433.5957275	1.611661093	0.6885484	0.040593818	1	21	14152911	14246600	+	2260	-	GO:0004672;GO:0005524;GO:0006468;GO:0004672;GO:0005524;GO:0006468;	-	-	-	-	-	-	-
ENSOCUG00000009869	1266.300964	1673.240101	859.3618276	0.513591461	-0.961306879	0.040595478	1	9	64876399	65127988	+	10194	LAMA3	GO:0005102;GO:0005102;GO:0005604;GO:0005610;GO:0005783;GO:0007155;GO:0007155;GO:0030155;GO:0030155;GO:0030334;GO:0030334;GO:0035987;GO:0045995;GO:0045995;GO:0005102;GO:0007155;GO:0030155;GO:0030334;GO:0045995;GO:0005102;GO:0007155;GO:0030155;GO:0030334;GO:0045995;	K06240	-	W	12R2U;09V1Y;1AW06;0V61M;0DJ6H;0UKHA;KOG1836;1CTYD	laminin subunit alpha 3 [Source:HGNC Symbol;Acc:HGNC:6483]	100346886	G1SY40
ENSOCUG00000038138	216.5360071	148.7233434	284.3486709	1.911930329	0.935029952	0.040639535	1	GL018752	1506699	1509226	-	327	TMEM265	GO:0016021;	-	-	-	-	transmembrane protein 265 [Source:HGNC Symbol;Acc:HGNC:51241]	-	-
ENSOCUG00000007353	158.1816116	85.91153523	230.451688	2.682430099	1.423540577	0.040641873	1	5	13449903	13471380	-	2422	PLLP	GO:0016020;GO:0016020;GO:0016020;GO:0016020;GO:0016021;	-	-	P;V	KOG4788;0UKNC;1CZI2;13Q8E;0VDPH;0DQG0;0A0J6;1B3AU	plasmolipin [Source:HGNC Symbol;Acc:HGNC:18553]	100345927	G1SSV7
ENSOCUG00000002767	172.7303996	217.4711717	127.9896274	0.588536064	-0.764797273	0.040929243	1	12	71105938	71193102	-	5554	CEP162	GO:0005813;GO:0005814;GO:0005879;GO:0060271;	K16809	-	Z;S	0IG8C;1CUEP;0DJMU;1B041;0V964;0UNE3;09Y8M;12S2J	centrosomal protein 162 [Source:HGNC Symbol;Acc:HGNC:21107]	100342132	-
ENSOCUG00000031211	62.14689344	92.1096331	32.18415377	0.349411377	-1.517001509	0.040941426	1	7	109000598	109114341	-	3678	-	GO:0005509;GO:0005515;	-	-	-	-	-	-	-
ENSOCUG00000027849	650.9893608	870.3450109	431.6337106	0.495934032	-1.011779865	0.041232856	1	21	8722667	8743763	+	3360	OAS3	GO:0001730;GO:0001730;GO:0003723;GO:0003723;GO:0003725;GO:0003725;GO:0003725;GO:0003725;GO:0005524;GO:0005524;GO:0005524;GO:0005654;GO:0005737;GO:0005829;GO:0005886;GO:0006955;GO:0006955;GO:0009615;GO:0016740;GO:0016740;GO:0016779;GO:0016779;GO:0045071;GO:0051607;GO:0051607;GO:0051607;GO:0060700;	K14216	EC:2.7.7.84	J;O	0DF4M;0V4TK;1CP6T;KOG0001;0UKKA;1B0YU;09TUC;12QYV	2'-5'-oligoadenylate synthetase 3 [Source:HGNC Symbol;Acc:HGNC:8088]	100340530	-
ENSOCUG00000004312	5848.784507	7101.236058	4596.332957	0.647258156	-0.627586855	0.041270507	1	7	172929143	172938492	-	2384	NCL	GO:0001525;GO:0003676;GO:0003676;GO:0003723;GO:0003723;GO:0003723;GO:0005634;GO:0005634;GO:0005654;GO:0005654;GO:0005730;GO:0005730;GO:0005938;GO:0008022;GO:0017148;GO:0036464;GO:0042162;GO:0042802;GO:0044547;GO:0045944;GO:0048027;GO:0071364;GO:1901838;GO:1990830;GO:1990904;	K11294	-	A;J;B	0B58J;0V3EP;0E8SB;0IRS7;0WHV7;13ECT;1DFPC;1BB7C	nucleolin [Source:HGNC Symbol;Acc:HGNC:7667]	100343134	-
ENSOCUG00000021444	10.65784967	4.143533192	17.17216615	4.144329332	2.051138652	0.04137458	1	GL018725	366752	367076	-	228	-	GO:0005576;GO:0005576;GO:0010466;GO:0030414;GO:0030414;	-	-	W	1B8HX;0VN1V;0DWMP;0AB8H;0JJ6H;1D5TF;14EJG;0UWN3	-	-	-
ENSOCUG00000010715	126.1640174	160.8500482	91.47798664	0.568715942	-0.81421985	0.041386524	1	17	77501027	77543061	+	3081	TUBGCP5	GO:0000226;GO:0000226;GO:0000922;GO:0000922;GO:0005737;GO:0005813;GO:0005815;GO:0005815;GO:0005829;GO:0005856;GO:0005874;GO:0007020;GO:0007020;GO:0007020;GO:0008017;GO:0008274;GO:0043015;GO:0043015;	K16572	-	Z	0DHIX;0UJRF;1CS94;KOG4344;13I6N;0W1R9;0APEH;1AWN7	tubulin gamma complex associated protein 5 [Source:HGNC Symbol;Acc:HGNC:18600]	100339583	G1SZV0
ENSOCUG00000006145	161.8495752	258.5312854	65.167865	0.252069551	-1.988106239	0.041658919	1	X	59041552	59219222	-	3300	CHRDL1	GO:0001654;GO:0005515;GO:0030514;GO:0048749;GO:0005515;GO:0005515;GO:0005515;	-	-	O;W	0IF8R;0UM7H;0DINB;09XAW;12QF2;0V899;1CTD7;1B13F	chordin like 1 [Source:HGNC Symbol;Acc:HGNC:29861]	100342237	-
ENSOCUG00000007405	48.83417127	65.64338707	32.02495548	0.48786263	-1.035453116	0.041902	1	8	45067736	45119988	+	4313	CENPJ	GO:0005654;GO:0005813;GO:0005814;GO:0005814;GO:0005814;GO:0005814;GO:0005886;GO:0007099;GO:0007224;GO:0015631;GO:0015631;GO:0015631;GO:0019901;GO:0019904;GO:0036064;GO:0042802;GO:0044458;GO:0046599;GO:0046599;GO:0046599;GO:0046785;GO:0051298;GO:0051301;GO:0051301;GO:0061511;GO:0098534;GO:1902857;GO:1903724;GO:1904951;GO:1905515;GO:0005814;GO:0015631;GO:0046599;GO:0051301;	K11502	-	S	0W29K;0JR8P;1BAJV;1DE84;0APXN;14FKR;0E3DW;0V29D	centromere protein J [Source:HGNC Symbol;Acc:HGNC:17272]	100347150	G1SSZ6
ENSOCUG00000015910	1115.505711	880.4626693	1350.548752	1.533908022	0.617211977	0.041910476	1	AAGW02082198	2181	5928	+	1741	DNASE1L1	GO:0004518;GO:0004519;GO:0004536;GO:0004536;GO:0005783;GO:0006308;GO:0006308;GO:0016787;GO:0090305;	K11995	EC:3.1.21.-	L	0A27Y;1B4UY;0VD3V;0DPRF;0UT6I;0IH3K;12V4Z;1CYVJ	deoxyribonuclease 1 like 1 [Source:HGNC Symbol;Acc:HGNC:2957]	100345828	B7NZQ3
ENSOCUG00000024688	695.8018782	845.9369191	545.6668373	0.645044359	-0.632529719	0.041950134	1	2	174257081	174322481	-	5261	DNMT3A	GO:0006306;GO:0008168;GO:0009008;GO:0010468;GO:0000122;GO:0000791;GO:0000978;GO:0003677;GO:0003886;GO:0005634;GO:0005654;GO:0005737;GO:0006306;GO:0006306;GO:0006306;GO:0008134;GO:0008168;GO:0008168;GO:0008168;GO:0009008;GO:0009008;GO:0010468;GO:0010468;GO:0016363;GO:0016740;GO:0032259;GO:0042802;GO:0090116;	-	-	K;B;L	0IGHW;1AYTS;0V9V9;1CV6J;0UHFH;09YXK;0DKCN;12SHE	DNA methyltransferase 3 alpha [Source:HGNC Symbol;Acc:HGNC:2978]	100344715	-
ENSOCUG00000003733	107.656151	48.60506564	166.7072364	3.429832553	1.778138145	0.041953389	1	GL018785	539468	854233	-	1503	SPOCK3	GO:0005509;GO:0005509;GO:0005515;	K08136	-	O;L	0DHAN;13JTW;0V6ZV;KOG3555;09W1K;1B3M5;1CS0Q;0UT8S	SPARC (osteonectin), cwcv and kazal like domains proteoglycan 3 [Source:HGNC Symbol;Acc:HGNC:13565]	100344368	-
ENSOCUG00000004205	13.82028952	6.501186206	21.13939284	3.251620884	1.701159059	0.042153448	1	12	70513198	70514439	+	1242	PRSS35	GO:0004252;GO:0004252;GO:0006508;GO:0006508;	-	-	O	0IF0G;09UBA;1CW4K;1AY1T;0DM9G;0UM9T;0VAMY;13JSZ	serine protease 35 [Source:HGNC Symbol;Acc:HGNC:21387]	100355702	G1TSZ4
ENSOCUG00000013363	572.3563143	440.9809052	703.7317234	1.595832643	0.674309362	0.042201946	1	1	144794463	145015582	+	4586	STIM1	GO:0005246;GO:0005515;GO:0030176;GO:0032237;GO:0051924;GO:0005246;GO:0005246;GO:0005515;GO:0016020;GO:0016021;GO:0030176;GO:0030176;GO:0032237;GO:0032237;GO:0051924;GO:0051924;GO:0005246;GO:0005515;GO:0030176;GO:0032237;GO:0051924;GO:0005246;GO:0005515;GO:0030176;GO:0032237;GO:0051924;GO:0002115;GO:0005246;GO:0005515;GO:0005783;GO:0005783;GO:0006812;GO:0014902;GO:0030176;GO:0032237;GO:0032991;GO:…	-	-	W;U	1B0WX;12U3H;1CWQ6;0VB42;0DMUQ;0UR1R;0A080;KOG4403	stromal interaction molecule 1 [Source:HGNC Symbol;Acc:HGNC:11386]	-	-
ENSOCUG00000008954	2394.010433	3145.672999	1642.347867	0.522097455	-0.937608969	0.042570987	1	13	98577791	98580288	-	738	GADD45A	GO:0000122;GO:0000185;GO:0005634;GO:0005634;GO:0005634;GO:0005737;GO:0016607;GO:0019900;GO:0033140;GO:0042770;GO:0042803;GO:0043065;GO:0043537;GO:0046330;GO:0046982;GO:0047485;GO:0051726;GO:0051726;GO:0071260;GO:0071479;GO:0071850;GO:0071901;GO:1900745;GO:2000379;GO:0005634;GO:0051726;GO:0005634;GO:0051726;	K04402	-	D;L	0V8X2;0UN20;12QUD;1AZ2H;0IFHI;1CU4I;0DJCA;09XZA	growth arrest and DNA damage inducible alpha [Source:HGNC Symbol;Acc:HGNC:4095]	100353284	G1SW81
ENSOCUG00000029688	592.6837189	884.1653391	301.2020987	0.34066264	-1.553584357	0.042599547	1	15	61633283	61689361	-	3188	HERC6	GO:0004842;GO:0004842;GO:0005654;GO:0005829;GO:0016567;GO:0016740;GO:0004842;GO:0004842;	-	-	O	0INH6	HECT and RLD domain containing E3 ubiquitin protein ligase family member 6 [Source:HGNC Symbol;Acc:HGNC:26072]	-	-
ENSOCUG00000015342	294.2765631	363.2373826	225.3157436	0.620298886	-0.688964562	0.042610591	1	2	112058257	112059183	+	724	-	-	-	-	J	1B613;0UVFY;0A7N8;0VIGS;13UNR;0J0VJ;0DUEK;1D3SD	-	-	-
ENSOCUG00000004366	26.43419895	37.23705271	15.63134519	0.419779334	-1.252296952	0.042625673	1	4	7119814	7120911	+	912	-	GO:0005634;GO:0005634;GO:0006334;GO:0006334;	-	-	L	0DQ8G;1CZA5;1B00E;0A2KV;0VDGV;0UTIC;KOG1508;1421F	-	-	-
ENSOCUG00000001188	4.377542137	8.339159344	0.415924929	0.049876122	-4.325506891	0.042781396	1	12	104301818	104337007	-	2105	-	GO:0005515;GO:0005576;GO:0005581;GO:0005581;GO:0005938;GO:0031012;	K19479	-	W	0APH7;1DAIY;1334V;0UNRU;0IGA1;1AY8J;0W1UA;0E3BB	-	100008763	-
ENSOCUG00000025408	262.1056069	97.96133937	426.2498744	4.351205048	2.121415005	0.042869217	1	AAGW02081905	2673	6148	+	1709	-	-	-	-	S	1D436;0DUSB;13XQM;0A7HD;0J4VC;1B66M;0UVSK;0VJ2E	-	-	-
ENSOCUG00000011752	59.99359909	41.58570782	78.40149037	1.885298928	0.914793292	0.043049637	1	17	16983366	17029463	+	1645	PYGO1	GO:0001822;GO:0002244;GO:0005634;GO:0007286;GO:0007289;GO:0034504;GO:0035064;GO:0045944;GO:0046872;GO:0048856;GO:0060070;	-	-	S;K	0UHUG;1CSIR;1B2CZ;0IDYF;12PYR;0DHUB;0V7HH;09WIY	pygopus family PHD finger 1 [Source:HGNC Symbol;Acc:HGNC:30256]	100342223	G1T1W7
ENSOCUG00000013997	24.42646557	35.15775089	13.69518026	0.389535164	-1.360174527	0.043154892	1	8	34025973	34079944	+	1948	RIMKLB	GO:0000166;GO:0005524;GO:0005524;GO:0005524;GO:0006464;GO:0006464;GO:0046872;GO:0046872;GO:0005524;GO:0005737;GO:0006464;GO:0046872;GO:0072590;GO:0072591;	-	-	J	1ASVV;0V90P;0IGDC;12TAK;0DJG9;09Y3C;0UN6X;1CU8S	ribosomal modification protein rimK like family member B [Source:HGNC Symbol;Acc:HGNC:29228]	-	-
ENSOCUG00000003682	1758.09612	1246.166351	2270.02589	1.821607435	0.865212085	0.043167147	1	19	25217906	25271343	+	1823	HNF1B	GO:0001889;GO:0003677;GO:0005634;GO:0006357;GO:0030073;GO:0031016;GO:0045893;GO:0001889;GO:0003677;GO:0005634;GO:0006357;GO:0030073;GO:0031016;GO:0045893;GO:0000122;GO:0000981;GO:0000987;GO:0001714;GO:0001822;GO:0001822;GO:0001826;GO:0001889;GO:0001889;GO:0001889;GO:0003677;GO:0003677;GO:0003677;GO:0003677;GO:0003700;GO:0003700;GO:0005634;GO:0005634;GO:0005634;GO:0005634;GO:0005634;GO:0005654;GO:…	K08034	-	-	-	HNF1 homeobox B [Source:HGNC Symbol;Acc:HGNC:11630]	100355480	-
ENSOCUG00000026310	232.1020551	178.3401429	285.8639674	1.602914312	0.680697304	0.043352594	1	13	139679845	139696004	+	3474	CASZ1	GO:0003676;GO:0003676;GO:0005654;GO:0005829;GO:0006355;GO:0006355;GO:0043231;GO:0045893;	-	-	S;O;K	KOG4377;1AW0K;09ZXG;0VAU0;0DMG8;1CWBM;12UF1;0UMV2	castor zinc finger 1 [Source:HGNC Symbol;Acc:HGNC:26002]	-	-
ENSOCUG00000016624	5920.572371	7255.326966	4585.817776	0.63206218	-0.661861603	0.043367163	1	19	10688067	10825106	+	6550	MYH10	GO:0000146;GO:0000281;GO:0001701;GO:0001725;GO:0001725;GO:0001764;GO:0001778;GO:0003279;GO:0003774;GO:0005515;GO:0005524;GO:0005524;GO:0005737;GO:0005737;GO:0005819;GO:0005829;GO:0005844;GO:0005886;GO:0005903;GO:0005938;GO:0005938;GO:0006887;GO:0006930;GO:0007097;GO:0007409;GO:0007411;GO:0007420;GO:0007507;GO:0007512;GO:0008283;GO:0008360;GO:0016459;GO:0016459;GO:0016460;GO:0016460;GO:0016887;GO:…	-	-	Z	1ARQQ;12P08;09T3R;0V42H;1CVD6;KOG0161;0UHE4;0DKJ2	myosin heavy chain 10 [Source:HGNC Symbol;Acc:HGNC:7568]	100009002	-
ENSOCUG00000010656	178.0081519	123.1792788	232.8370249	1.890228838	0.918560903	0.043452934	1	1	38759486	38896590	+	2339	TTC39B	GO:0005515;GO:0010874;GO:0010887;GO:0042632;GO:0090181;GO:0005515;	-	-	S;I;U	KOG3783;0V6UJ;0UJ5M;12NMI;09VVX;0DH42;1B3N1;1CRUA	tetratricopeptide repeat domain 39B [Source:HGNC Symbol;Acc:HGNC:23704]	100348534	G1TVN6
ENSOCUG00000009674	270.9903826	334.627997	207.3527681	0.619651583	-0.690470848	0.043482438	1	AAGW02080442	46584	46721	+	138	-	GO:0005737;GO:0005737;GO:0042325;GO:0042325;	-	-	T	1B61D;0VIQJ;0DUKK;0URZ8;0A6NW;0IYZK;13T9Y;1D3XZ	-	-	-
ENSOCUG00000022650	833.4691813	644.9296989	1022.008664	1.584682277	0.664193614	0.043651603	1	GL018942	182428	187331	-	2090	SYVN1	GO:0000836;GO:0016567;GO:0030433;GO:0061630;GO:0000836;GO:0000836;GO:0000839;GO:0005654;GO:0005783;GO:0005790;GO:0006511;GO:0016020;GO:0016021;GO:0016567;GO:0016567;GO:0016567;GO:0018279;GO:0030433;GO:0030433;GO:0030433;GO:0030970;GO:0036503;GO:0036513;GO:0050821;GO:0051082;GO:0051087;GO:0051117;GO:0061630;GO:0061630;GO:0061630;GO:0070936;GO:1902236;GO:1990381;GO:0000836;GO:0000836;GO:0016020;GO:…	K10601	EC:2.3.2.27	O	0UIBW;KOG0802;1CTIC;0VBIP;12SZT;0A0NK;1ARS3;0DIT2	synoviolin 1 [Source:HGNC Symbol;Acc:HGNC:20738]	100354913	-
ENSOCUG00000002289	1322.463743	1026.205593	1618.721893	1.577385568	0.657535348	0.043683769	1	GL018752	1199146	1200743	+	489	VKORC1	GO:0005783;GO:0007596;GO:0016020;GO:0016021;GO:0017144;GO:0017187;GO:0042373;GO:0042373;GO:0042373;GO:0047057;GO:0047057;GO:0047057;GO:0055114;	K05357	EC:1.17.4.4	S;O	0UV19;1B5GA;0J0HT;0VHK2;09YCU;0DJSP;13U7S;1D2ZC	vitamin K epoxide reductase complex subunit 1 [Source:HGNC Symbol;Acc:HGNC:23663]	100352876	G1SH78
ENSOCUG00000009353	292.8491259	224.1163876	361.5818642	1.613366466	0.690074175	0.043826572	1	GL018928	94866	160270	+	2715	PPARA	GO:0000122;GO:0000978;GO:0001103;GO:0001227;GO:0001228;GO:0003677;GO:0003677;GO:0003677;GO:0003700;GO:0003700;GO:0003700;GO:0003707;GO:0003707;GO:0003707;GO:0004879;GO:0004879;GO:0004879;GO:0005634;GO:0005634;GO:0005634;GO:0005634;GO:0005654;GO:0006355;GO:0006355;GO:0008134;GO:0008144;GO:0008270;GO:0008270;GO:0008289;GO:0010565;GO:0010745;GO:0010871;GO:0010887;GO:0010891;GO:0019217;GO:0030522;GO:…	K07294	-	K	0A23N;0VCZ3;1ARZJ;0DPRR;1CPXP;0URS3;12RCV;KOG3575	peroxisome proliferator activated receptor alpha [Source:HGNC Symbol;Acc:HGNC:9232]	100356422	-
ENSOCUG00000000947	181.7716329	139.3664599	224.176806	1.608542014	0.685753619	0.043906021	1	12	76007660	76023321	+	1548	PM20D2	GO:0005654;GO:0006508;GO:0006508;GO:0016787;GO:0016787;GO:0016805;GO:0016805;GO:0032268;GO:0032268;	-	-	E	13JHC;0IFYV;1AV5C;0VB8T;0DP1W;1CXZS;0A1EC;0UFMP	peptidase M20 domain containing 2 [Source:HGNC Symbol;Acc:HGNC:21408]	100340757	-
ENSOCUG00000004261	68.66735902	103.0905659	34.24415219	0.332175422	-1.589982765	0.043968878	1	18	41585683	41592536	+	1098	SLC35G1	GO:0005623;GO:0005789;GO:0005886;GO:0016020;GO:0016020;GO:0016020;GO:0016021;GO:0016021;GO:0016021;GO:0051480;GO:1990034;	-	-	G;E	0V5MG;KOG4510;0UG80;1AS14;1CQM5;09UMV;12U0G;0DFXQ	solute carrier family 35 member G1 [Source:HGNC Symbol;Acc:HGNC:26607]	100347683	-
ENSOCUG00000027795	18.57295762	9.453580416	27.69233482	2.929295949	1.550553957	0.043979637	1	GL019405	11731	29606	+	1566	-	-	-	-	Q	KOG1516	-	-	-
ENSOCUG00000003187	128.4328026	95.21582858	161.6497767	1.697719582	0.763598184	0.044118794	1	4	7699772	7707274	-	1451	REM1	GO:0000166;GO:0003924;GO:0003924;GO:0003924;GO:0005525;GO:0005525;GO:0005525;GO:0007165;GO:0007165;GO:0016020;GO:0016020;GO:1901842;GO:1901842;GO:1901842;	-	-	S;J	1CQPK;0V77K;0UMXS;12UZ0;0DID0;09YEU;1B3R5;KOG0395	RRAD and GEM like GTPase 1 [Source:HGNC Symbol;Acc:HGNC:15922]	100354515	G1SJ70
ENSOCUG00000014310	101.7548131	130.5897569	72.91986927	0.558388889	-0.84065786	0.044138568	1	19	24506277	24514544	-	1458	NLE1	GO:0001756;GO:0001822;GO:0001826;GO:0005515;GO:0005634;GO:0005654;GO:0005730;GO:0005730;GO:0005730;GO:0007219;GO:0042273;GO:0045930;GO:0048705;GO:0061484;GO:0090263;GO:2001268;GO:0005515;	K14855	-	S;K	1AYMI;0URBZ;0DN37;12P0E;1CWZN;0V95Y;KOG0271;09Y8E	notchless homolog 1 [Source:HGNC Symbol;Acc:HGNC:19889]	100357680	G1T753
ENSOCUG00000006258	71.19356038	97.88593443	44.50118633	0.454622889	-1.137257772	0.044266457	1	17	18867867	19070558	+	4357	WDR72	GO:0005515;GO:0005737;GO:0005768;GO:0022617;GO:0070166;GO:0072659;	-	-	S	0KDHE;0E5XY;0B0HM;14TQA;1BA4Z;0WD0R;0V1BP;1DCXD	WD repeat domain 72 [Source:HGNC Symbol;Acc:HGNC:26790]	100353113	G1SQM6
ENSOCUG00000004730	119.1640653	88.65113576	149.6769949	1.688382146	0.755641479	0.044299681	1	3	125132686	125263278	-	2107	SYBU	GO:0005874;GO:0017075;GO:0017075;GO:0019894;GO:0019894;GO:0031982;GO:0043231;GO:0017075;GO:0019894;GO:0017075;GO:0019894;	-	-	S	0DKUU;1AUYM;0VA9R;12SQW;0UJG0;09ZCM;0IGP3;1CVPV	syntabulin [Source:HGNC Symbol;Acc:HGNC:26011]	100348471	-
ENSOCUG00000011196	33.52744554	21.08315225	45.97173883	2.180496459	1.124656648	0.044391977	1	8	32792470	32798657	+	1576	LAG3	GO:0002270;GO:0004888;GO:0005576;GO:0007166;GO:0009897;GO:0016020;GO:0016021;GO:0042289;GO:0042289;GO:0045085;GO:0045590;GO:0045954;GO:0050776;GO:0050868;	K06565	-	T	1AUZD;12R5A;0V9CK;09YEP;0DJV1;0IFPP;0UNPP;1CUN8	lymphocyte activating 3 [Source:HGNC Symbol;Acc:HGNC:6476]	100343807	G1T0T9
ENSOCUG00000017525	3886.807025	3095.480106	4678.133944	1.511278956	0.595769982	0.044711763	1	21	11106927	11446530	-	7847	MED13L	GO:0003712;GO:0006357;GO:0016592;GO:0003712;GO:0006357;GO:0016592;GO:0003712;GO:0006357;GO:0016592;GO:0003712;GO:0006357;GO:0016592;GO:0003712;GO:0003712;GO:0005634;GO:0006357;GO:0006357;GO:0016592;GO:0016592;GO:0003712;GO:0006357;GO:0016592;GO:0003712;GO:0006357;GO:0016592;	K15164	-	K	12NM5;09U8U;0DFIK;1B0FJ;0V57Z;1CQ8C;0UGWG;KOG3600	mediator complex subunit 13L [Source:HGNC Symbol;Acc:HGNC:22962]	100342832	G1TDW3
ENSOCUG00000002632	8442.711744	10202.37791	6683.045577	0.655047836	-0.610327828	0.044720145	1	4	36310427	36323370	+	1125	KRT7	GO:0005737;GO:0005882;GO:0045095;GO:0045095;	-	-	Z	0V55Z;1AYEQ;0IG4R;1CQD9;09UDU;0UPYZ;12RWC;0DFPP	keratin 7 [Source:HGNC Symbol;Acc:HGNC:6445]	-	-
ENSOCUG00000011567	15.25278836	7.869326243	22.63625049	2.876516971	1.524322982	0.044827979	1	1	18390050	18445392	-	4262	-	GO:0000166;GO:0000287;GO:0005524;GO:0015914;GO:0016021;GO:0140326;GO:0000166;GO:0000287;GO:0005524;GO:0015914;GO:0016021;GO:0140326;GO:0000166;GO:0000287;GO:0001669;GO:0005524;GO:0007030;GO:0015914;GO:0015914;GO:0016020;GO:0016021;GO:0090555;GO:0140326;GO:0140345;GO:0000166;GO:0000166;GO:0000166;GO:0000287;GO:0000287;GO:0000287;GO:0005524;GO:0005524;GO:0005524;GO:0015914;GO:0015914;GO:0016020;GO:…	K01530	EC:7.6.2.1	P	0V51J;1CSPW;09WPI;KOG0206;0UNKP;0DHZ6;12PKI;1B3N9	-	100345551	-
ENSOCUG00000031290	9.669834099	3.890060204	15.44960799	3.971560125	1.989705844	0.044892074	1	GL019059	103764	106524	-	262	-	-	-	-	-	-	-	-	-
ENSOCUG00000004895	135.431684	96.99161535	173.8717527	1.792647252	0.84209163	0.044947005	1	1	35017581	35570050	-	5887	ADAMTSL1	GO:0008233;GO:0006508;GO:0008233;GO:0008233;GO:0008233;GO:0008233;	-	-	O	13BI8;KOG4597;0V2SI;0WFWR;0E7PU;1BAR2;1DEPZ;0B3HG;KOG3538	ADAMTS like 1 [Source:HGNC Symbol;Acc:HGNC:14632]	100339363	-
ENSOCUG00000008408	15.5546275	23.51894106	7.59031394	0.32273196	-1.631591642	0.045113321	1	6	4173921	4242585	+	2772	ATF7IP2	GO:0005515;	-	-	K	1CWAG;0IGEJ;09ZWM;0UQMU;12SCM;0VAT8;0DMF8;1B0DC	activating transcription factor 7 interacting protein 2 [Source:HGNC Symbol;Acc:HGNC:20397]	-	-
ENSOCUG00000023898	10.71901156	4.695833571	16.74218955	3.565328562	1.834035034	0.045126943	1	GL018835	39903	41834	-	1506	CCDC8	GO:0000226;GO:0005654;GO:0005737;GO:0005813;GO:0005829;GO:0005886;GO:0007088;GO:0010923;GO:1990393;	-	-	S	0UUK9;1D1WB;0VG1Q;1AXIB;0J8V3;0A56A;0DSKA;140NK	coiled-coil domain containing 8 [Source:HGNC Symbol;Acc:HGNC:25367]	-	-
ENSOCUG00000012556	212.1187001	155.3023436	268.9350566	1.731687045	0.792178226	0.045228097	1	GL018822	116776	252143	+	3594	NFATC2	GO:0003677;GO:0003677;GO:0003700;GO:0003700;GO:0006355;GO:0006355;GO:0000122;GO:0000790;GO:0000976;GO:0000978;GO:0000981;GO:0001227;GO:0001228;GO:0001816;GO:0003677;GO:0003682;GO:0003700;GO:0003700;GO:0005634;GO:0005634;GO:0005654;GO:0005667;GO:0005737;GO:0005737;GO:0005829;GO:0005829;GO:0006355;GO:0006974;GO:0008134;GO:0010628;GO:0014904;GO:0016477;GO:0019902;GO:0030890;GO:0033173;GO:0042493;GO:…	K17332	-	K	0IHFR;0V7UX;09WWQ;1AWMG;0UHPX;1CSXJ;12U00;0DI76	nuclear factor of activated T cells 2 [Source:HGNC Symbol;Acc:HGNC:7776]	100353824	-
ENSOCUG00000010409	115.6211514	146.8685581	84.37374468	0.574484735	-0.799659537	0.045337957	1	14	142004329	142024454	+	2869	-	GO:0003676;GO:0003676;GO:0003723;GO:0003723;GO:0003723;	-	-	A	0A1BM;13QTJ;0IY0E;0DHTC;0VC75;1CXWR;1AVKD;0UK49	-	100347332	G1SZ82
ENSOCUG00000037066	21.19292255	11.73250803	30.65333707	2.61268409	1.385532693	0.045538802	1	9	1401435	1408072	-	1669	-	GO:0003676;GO:0006355;	-	-	-	-	-	-	-
ENSOCUG00000001710	558.5634778	679.5574722	437.5694835	0.643903572	-0.635083442	0.045697529	1	3	62472878	62494099	+	3549	MCM4	GO:0000166;GO:0003677;GO:0003677;GO:0003677;GO:0003678;GO:0003678;GO:0003678;GO:0003678;GO:0003678;GO:0003697;GO:0004386;GO:0005524;GO:0005524;GO:0005524;GO:0005634;GO:0005654;GO:0006260;GO:0006260;GO:0006260;GO:0006268;GO:0006270;GO:0006270;GO:0016787;GO:0042555;GO:0042555;GO:0042555;GO:0003677;GO:0003678;GO:0005524;GO:0006260;GO:0006270;GO:0042555;GO:0003677;GO:0003678;GO:0005524;GO:0006260;GO:…	K02212	EC:3.6.4.12	L	09YI7;0V9FY;12R89;0UPI4;1CVDK;0DKJC;1AZ68;KOG0478	minichromosome maintenance complex component 4 [Source:HGNC Symbol;Acc:HGNC:6947]	100349822	G1SFZ1
ENSOCUG00000006867	7152.192382	5382.566522	8921.818242	1.657539801	0.729043513	0.045721381	1	13	23858236	23892960	-	1409	ATP1B1	GO:0001671;GO:0005391;GO:0005524;GO:0005886;GO:0005886;GO:0005890;GO:0005890;GO:0006813;GO:0006814;GO:0006874;GO:0006883;GO:0008022;GO:0008144;GO:0010468;GO:0010882;GO:0014704;GO:0016020;GO:0016323;GO:0016324;GO:0016324;GO:0016328;GO:0016887;GO:0019829;GO:0019901;GO:0030007;GO:0030315;GO:0030955;GO:0031090;GO:0031402;GO:0032781;GO:0035725;GO:0036126;GO:0036376;GO:0042383;GO:0046034;GO:0050821;GO:…	K01540	-	-	-	Oryctolagus cuniculus ATPase Na+/K+ transporting subunit beta 1 (ATP1B1), mRNA. [Source:RefSeq mRNA;Acc:NM_001082073]	100008749	Q9TT37
ENSOCUG00000007685	8211.992398	10152.27857	6271.706221	0.617763409	-0.694873674	0.045886819	1	GL018699	483838	684005	+	4073	ANGPTL2	-	-	-	S;T;E	0DH5X;1B35P;1CRW5;13DWM;0V6W2;0UNZ8;KOG2579;09VXJ	angiopoietin like 2 [Source:HGNC Symbol;Acc:HGNC:490]	100354822	-
ENSOCUG00000007759	946.2608006	752.2036672	1140.317934	1.515969655	0.600240876	0.045930206	1	GL018823	809649	831344	-	2719	USP2	GO:0006511;GO:0016579;GO:0036459;GO:0000122;GO:0004843;GO:0005737;GO:0006508;GO:0006511;GO:0006511;GO:0008233;GO:0008234;GO:0016579;GO:0016579;GO:0016579;GO:0016579;GO:0016579;GO:0016787;GO:0030332;GO:0031625;GO:0032922;GO:0036459;GO:0036459;GO:0036459;GO:0042802;GO:0043153;GO:0045475;GO:0045931;GO:0048512;GO:0050821;GO:0006511;GO:0016579;GO:0036459;	K11833	EC:3.4.19.12	O	12NIM;KOG1868;09UJV;0UQHH;0DEI1;1AZM4;1CYXR;0V5J1	ubiquitin specific peptidase 2 [Source:HGNC Symbol;Acc:HGNC:12618]	100339033	G1STQ2
ENSOCUG00000004994	18.1426923	27.03985818	9.245526428	0.341922149	-1.548260213	0.046008976	1	4	84539740	84573236	+	1743	-	-	-	-	S	1B38K;0IEYD;13KF2;0UK5V;0VA76;1CVKY;09UII;0DKSA	-	-	-
ENSOCUG00000021747	110.5834288	139.3905296	81.77632808	0.586670618	-0.769377356	0.046069335	1	13	99337246	99424659	+	3892	WDR78	GO:0002244;GO:0005515;GO:0005515;	-	-	Z	0VB7N;0UM8G;1AWQF;1CWU5;0DMYB;KOG1587;09WTU;13HY9	WD repeat domain 78 [Source:HGNC Symbol;Acc:HGNC:26252]	100351421	G1U1R4
ENSOCUG00000001299	1107.705533	835.8693386	1379.541728	1.650427482	0.722839749	0.046108411	1	1	153844934	153986385	+	4030	MICAL2	GO:0003779;GO:0005515;GO:0005634;GO:0010735;GO:0030042;GO:0043914;GO:0071949;GO:0003779;GO:0003779;GO:0005515;GO:0005634;GO:0005634;GO:0007010;GO:0010735;GO:0010735;GO:0016174;GO:0016491;GO:0016709;GO:0019417;GO:0030042;GO:0030042;GO:0043914;GO:0055114;GO:0071949;GO:0003779;GO:0005515;GO:0005634;GO:0010735;GO:0030042;GO:0043914;GO:0071949;GO:0003779;GO:0005515;GO:0005634;GO:0010735;GO:0030042;GO:…	K19947	EC:1.14.13.225	Z	0V43E;1CS6D;09T4P;KOG1700;0USNK;0DHG7;1B2TZ;12N1P	microtubule associated monooxygenase, calponin and LIM domain containing 2 [Source:HGNC Symbol;Acc:HGNC:24693]	100353897	-
ENSOCUG00000017544	180.3714399	138.6650333	222.0778464	1.601541796	0.679461449	0.046204292	1	GL018867	493253	577156	+	4813	PNPLA7	GO:0006629;GO:0006629;GO:0006629;GO:0006629;GO:0016020;GO:0016021;GO:0016042;GO:0016787;GO:0006629;GO:0006629;GO:0006629;GO:0006629;	K14676	EC:3.1.1.5	O;I	0UPTC;KOG2968;12S4D;09VN1;1CU97;1AXUC;0DJGR;0V917	patatin like phospholipase domain containing 7 [Source:HGNC Symbol;Acc:HGNC:24768]	100349366	-
ENSOCUG00000015837	7271.623127	11216.70966	3326.536592	0.296569733	-1.753556725	0.046294269	1	3	32805330	32816987	+	747	-	GO:0006689;GO:0006689;GO:0008047;GO:0008047;GO:0043085;	K12383	-	O;G	1CWVZ;0A0D1;0DMZQ;0IX9N;0VB98;1AW9K;0UGUC;13R58	-	100346953	G1TAB2
ENSOCUG00000004616	261.9055993	326.3504146	197.460784	0.605057555	-0.724855712	0.046321465	1	13	42096342	42103732	+	2079	MTMR11	GO:0005737;	K18085	-	S	0V4XH;0DF8P;0UPTB;13H6X;1CPYA;09TYK;KOG1089;1B4Y0	myotubularin related protein 11 [Source:HGNC Symbol;Acc:HGNC:24307]	100357145	-
ENSOCUG00000016321	79.02713676	53.92011703	104.1341565	1.931267257	0.949547824	0.046563415	1	4	83144310	83183712	-	1590	GLT8D2	GO:0016757;GO:0016740;GO:0016757;GO:0016757;	-	-	G	1B1FD;0V8TE;0UMXJ;0IEE5;09XVX;12ZDG;1CU0D;0DJ8E	glycosyltransferase 8 domain containing 2 [Source:HGNC Symbol;Acc:HGNC:24890]	100342876	G1TBD8
ENSOCUG00000012687	73.33208803	96.19184989	50.47232617	0.524704808	-0.930422084	0.046626258	1	19	18587329	18606103	-	1924	ANKRD13B	GO:0002091;GO:0005515;GO:0005737;GO:0005769;GO:0005770;GO:0005886;GO:0043231;GO:0048471;GO:0140036;GO:0005515;	K21437	-	H;S;C	1CQP1;09UPR;0DFZF;1B1QC;0V5PB;KOG0522;0UM63;12NJ2	ankyrin repeat domain 13B [Source:HGNC Symbol;Acc:HGNC:26363]	100347268	-
ENSOCUG00000007241	168.4189212	125.891017	210.9468255	1.675630482	0.744704034	0.046627835	1	1	70435982	70499487	-	1656	IPPK	GO:0000166;GO:0005524;GO:0005524;GO:0005524;GO:0005730;GO:0016301;GO:0016310;GO:0016740;GO:0035299;GO:0035299;GO:0035299;GO:0035299;GO:0052746;GO:0060090;GO:1901838;	K10572	EC:2.7.1.158	T	0A1S3;0VCMQ;0USEE;1CYC6;0DMTW;13BPF;1AY3F;KOG4749	inositol-pentakisphosphate 2-kinase [Source:HGNC Symbol;Acc:HGNC:14645]	100351214	-
ENSOCUG00000002153	425.5858221	520.5393187	330.6323255	0.635172625	-0.654779359	0.046641611	1	12	22669367	22686346	+	2821	ATAT1	GO:0004468;GO:0005794;GO:0005829;GO:0005874;GO:0007283;GO:0019799;GO:0019799;GO:0019799;GO:0021542;GO:0045598;GO:0050662;GO:0071929;GO:0071929;GO:0072686;GO:0097427;GO:1900227;GO:0005874;GO:0019799;GO:0071929;GO:0005737;GO:0005819;GO:0005856;GO:0005874;GO:0005874;GO:0005905;GO:0005925;GO:0016020;GO:0016740;GO:0016746;GO:0019799;GO:0019799;GO:0019799;GO:0030054;GO:0030424;GO:0042995;GO:0048666;GO:…	K19573	EC:2.3.1.108	O	0DFYX;0V5NT;09UP6;1CQNC;KOG4601;13SQ2;1ASR7;0UHHX	alpha tubulin acetyltransferase 1 [Source:HGNC Symbol;Acc:HGNC:21186]	100358006	-
ENSOCUG00000029090	21800.0996	17298.75552	26301.44369	1.520424036	0.604473738	0.046672412	1	MT	3920	4963	+	1044	ND2	GO:0005739;GO:0005743;GO:0005747;GO:0006120;GO:0006120;GO:0008137;GO:0008137;GO:0008137;GO:0016020;GO:0016021;GO:0055114;GO:0055114;GO:0055114;GO:0070469;GO:0072593;	-	-	C	1DF22;13CIR;0E82V;0WGJ6;0B439;0V30S;0IPMV;1BAX0	NADH dehydrogenase subunit 2 [Source:NCBI gene;Acc:808230]	-	-
ENSOCUG00000013272	1865.269717	1455.733687	2274.805746	1.562652404	0.643996901	0.046672453	1	15	94031025	94168279	-	3110	SEC24D	GO:0000139;GO:0000149;GO:0001701;GO:0006886;GO:0006886;GO:0006888;GO:0006888;GO:0006888;GO:0008270;GO:0008270;GO:0008270;GO:0015031;GO:0030127;GO:0030127;GO:0030127;GO:0043231;GO:0090110;GO:0006886;GO:0006888;GO:0008270;GO:0030127;	K14007	-	U	12NEV;09WXB;0V7VJ;KOG1985;0UKMZ;0DI7V;1AYYH;1CSY9	SEC24 homolog D, COPII coat complex component [Source:HGNC Symbol;Acc:HGNC:10706]	100340337	-
ENSOCUG00000002051	30.33065447	50.32023581	10.34107312	0.205505259	-2.282752778	0.046680918	1	15	26535173	26537254	-	1227	-	-	-	-	-	-	-	-	-
ENSOCUG00000009168	422.5932536	512.6910239	332.4954834	0.648529949	-0.624754896	0.046705562	1	8	37812355	37833951	-	2269	HDHD5	-	-	-	-	-	haloacid dehalogenase like hydrolase domain containing 5 [Source:HGNC Symbol;Acc:HGNC:1843]	100352841	G1SWP1
ENSOCUG00000000483	69.43210422	25.82616499	113.0380435	4.376880715	2.129903066	0.046824034	1	16	37165675	37210277	-	2367	CAPN9	GO:0004198;GO:0005509;GO:0006508;GO:0045214;GO:0004198;GO:0005509;GO:0006508;GO:0045214;GO:0004198;GO:0004198;GO:0005509;GO:0005509;GO:0006508;GO:0006508;GO:0006508;GO:0008233;GO:0008234;GO:0016787;GO:0045214;GO:0045214;	K08578	EC:3.4.22.-	O;T	0V5ZI;09UZS;1CQ66;12P1K;KOG0045;0UGT1;0DFGG;1ASGW	calpain 9 [Source:HGNC Symbol;Acc:HGNC:1486]	100358896	G1SDE0
ENSOCUG00000011493	445.3833113	594.4897057	296.276917	0.498371821	-1.004705598	0.046848932	1	12	30772341	30777928	-	1881	UNC5CL	GO:0005042;GO:0005042;GO:0005515;GO:0006508;GO:0007165;GO:0007165;GO:0008233;GO:0016020;GO:0016020;GO:0016021;GO:0016021;GO:0016021;GO:0038007;GO:0038007;GO:0043123;GO:0046330;	-	-	T	1CUWN;136A2;0V9K4;0UNZA;1B0CE;KOG1480;0DK2W;09YNE	unc-5 family C-terminal like [Source:HGNC Symbol;Acc:HGNC:21203]	100339652	G1T1E1
ENSOCUG00000022368	232.4277788	178.5862804	286.2692772	1.602974633	0.680751595	0.046903832	1	GL019178	89321	94616	+	3557	CCDC92	GO:0005654;GO:0005813;GO:0005814;GO:0043231;	K16452	-	S	0UHUD;09UWP;0IIA1;1B3RH;1CQVS;0V5WF;12P1D;0DG64	coiled-coil domain containing 92 [Source:HGNC Symbol;Acc:HGNC:29563]	100355263	-
ENSOCUG00000000655	96.62166572	123.172041	70.07129047	0.568889578	-0.813779443	0.046994137	1	16	62045507	62343943	-	2331	HHAT	GO:0007224;GO:0007224;GO:0007224;GO:0016020;GO:0016021;GO:0016409;GO:0016409;GO:0016409;GO:0018345;GO:0018345;GO:0018345;GO:0007224;GO:0016409;GO:0018345;GO:0007224;GO:0016409;GO:0018345;GO:0007224;GO:0016409;GO:0018345;	-	-	T	0V61U;1AYMR;0DGBJ;1CR0Z;KOG3860;09V24;12PGB;0UI20	hedgehog acyltransferase [Source:HGNC Symbol;Acc:HGNC:18270]	100348255	-
ENSOCUG00000028053	844.9895229	1212.191325	477.7877208	0.394152071	-1.343175741	0.046999582	1	1	70308335	70328717	-	1285	ASPN	GO:0005509;GO:0005509;GO:0005509;GO:0005515;GO:0005518;GO:0005518;GO:0030282;GO:0030512;GO:0030512;GO:0031012;GO:0031012;GO:0070171;GO:0005509;GO:0005515;GO:0005518;	K08120	-	T	0DK46;KOG0619;1CUXX;12P1N;0V9ME;09YPQ;1AYJD;0UP0Y	asporin [Source:HGNC Symbol;Acc:HGNC:14872]	103348342	-
ENSOCUG00000003991	38.64816703	25.40634683	51.88998723	2.042402537	1.030267235	0.047007192	1	14	31745618	31783413	-	2888	DZIP1L	GO:0003676;GO:0003676;GO:0005814;GO:0005814;GO:0005930;GO:0007224;GO:0021532;GO:0032880;GO:0033365;GO:0033504;GO:0036064;GO:0036064;GO:0060271;GO:0060271;GO:0061512;GO:1905349;GO:0003676;GO:0003676;GO:0003676;	K16470	-	S;Z	1ARF3;0V480;09T90;0UFJ6;0IJJY;0DEK6;13INY;1CPA4	DAZ interacting zinc finger protein 1 like [Source:HGNC Symbol;Acc:HGNC:26551]	100352428	G1SKV1
ENSOCUG00000005728	32.02928353	43.86930325	20.1892638	0.460213915	-1.119623489	0.047045712	1	18	8825768	8827147	+	1380	GPRIN2	-	-	-	S	0VC9Y;09ZX4;13S5W;0DP1X;1ASEH;1CXZU;0UJ37;0IYCC	G protein regulated inducer of neurite outgrowth 2 [Source:HGNC Symbol;Acc:HGNC:23730]	100348424	G1SPI4
ENSOCUG00000014970	1994.601202	2383.643947	1605.558457	0.673573106	-0.570093558	0.047090241	1	7	164260187	164415633	+	3313	ACSL3	GO:0001676;GO:0003824;GO:0004467;GO:0005783;GO:0005794;GO:0005811;GO:0019901;GO:0019904;GO:0034379;GO:0042998;GO:0044539;GO:0048471;GO:0051047;GO:2001247;GO:0003824;GO:0003824;GO:0003824;GO:0016020;GO:0016021;GO:0003824;GO:0003824;GO:0003824;	K01897	EC:6.2.1.3	I	0DHRP;0V7EU;KOG1256;0UIC7;09WG8;12PYZ;1CWTU;1AY67	acyl-CoA synthetase long chain family member 3 [Source:HGNC Symbol;Acc:HGNC:3570]	100358351	-
ENSOCUG00000017803	361.8961927	118.4173885	605.374997	5.112213712	2.353948148	0.047201333	1	GL018999	5643	30420	+	5065	-	GO:0004181;GO:0006508;GO:0008270;GO:0004181;GO:0004181;GO:0006508;GO:0006508;GO:0008270;GO:0008270;	-	-	O	KOG2649	-	-	-
ENSOCUG00000011201	76.84594861	11.28788948	142.4040077	12.61564511	3.657142077	0.047255972	1	13	119759447	119779522	-	2336	CYP4B1	GO:0005506;GO:0016705;GO:0020037;GO:0055114;GO:0005506;GO:0016705;GO:0020037;GO:0055114;GO:0004497;GO:0005506;GO:0005506;GO:0016020;GO:0016021;GO:0016491;GO:0016705;GO:0016705;GO:0020037;GO:0020037;GO:0046872;GO:0055114;GO:0055114;GO:0055114;GO:0005506;GO:0016705;GO:0020037;GO:0055114;GO:0004497;GO:0005506;GO:0005506;GO:0016020;GO:0016021;GO:0016491;GO:0016705;GO:0016705;GO:0020037;GO:0020037;GO:…	K07426	EC:1.14.14.1	Q	0DIWE;0UNSK;09XIZ;1CUC9;KOG0157;12PPT;1B2IQ;0V8GR	Oryctolagus cuniculus CYP4B1-like isozyme short form (CYP4B1), mRNA. [Source:RefSeq mRNA;Acc:NM_001082103]	100008805	P15128
ENSOCUG00000013023	235.2960901	414.9194767	55.67270354	0.134177128	-2.897789331	0.047447825	1	X	16704575	16850114	+	2993	-	GO:0004370;GO:0005975;GO:0006072;GO:0016773;GO:0004370;GO:0005975;GO:0006072;GO:0016773;GO:0005975;GO:0016773;GO:0004370;GO:0004370;GO:0005975;GO:0005975;GO:0006072;GO:0006072;GO:0016301;GO:0016310;GO:0016740;GO:0016773;GO:0016773;GO:0004370;GO:0004370;GO:0005975;GO:0005975;GO:0006072;GO:0006072;GO:0016301;GO:0016310;GO:0016740;GO:0016773;GO:0016773;GO:0004370;GO:0005975;GO:0006072;GO:0016773;GO:…	K00864	EC:2.7.1.30	G	KOG2517;0UFQA;0DHQ5;09UHN;1ARJJ;0V5GV;12P47;1CSEH	-	100354726	U3KM58
ENSOCUG00000003662	2387.526476	1879.291289	2895.761664	1.540879629	0.623754166	0.047528714	1	9	6268067	6308380	+	5319	PLXNA1	GO:0005515;GO:0005654;GO:0005829;GO:0007165;GO:0007165;GO:0014910;GO:0016020;GO:0016020;GO:0016021;GO:0017154;GO:0017154;GO:0017154;GO:0060666;GO:0071526;GO:0071526;GO:0097485;GO:1990138;	K06820	-	T	0UPC4;12RMW;1AV16;1CQC8;09UD0;0V5C8;0DFNS;KOG3610	plexin A1 [Source:HGNC Symbol;Acc:HGNC:9099]	100358783	-
ENSOCUG00000039657	15.62809468	24.44595845	6.810230917	0.278583101	-1.843820348	0.047618024	1	17	21603273	21605016	-	321	-	-	-	-	-	-	-	-	-
ENSOCUG00000024282	2131.746116	1161.12529	3102.366942	2.671862348	1.417845683	0.047693656	1	7	60474273	60496317	+	4045	PLEKHB2	GO:0016021;GO:0016021;GO:0016021;GO:0016021;GO:0016021;	K23857	-	T	0IFNJ;12U15;1CVZC;0DM4B;0UQ7K;09ZKQ;1AZY3;0VAHE	pleckstrin homology domain containing B2 [Source:HGNC Symbol;Acc:HGNC:19236]	100359038	G1U1Y2
ENSOCUG00000008591	983.7455889	218.7165088	1748.774669	7.995622638	2.999210384	0.04779318	1	13	55012168	55107257	-	3042	KIAA1324	GO:0000045;GO:0005764;GO:0005770;GO:0005802;GO:0005886;GO:0005887;GO:0009267;GO:0016020;GO:0016021;GO:0044090;GO:2000786;	-	-	T	1BB50;1DFIX;0B4ZM;0WHJ8;0E8M4;0IR78;13DWW;0V3BP	KIAA1324 [Source:HGNC Symbol;Acc:HGNC:29618]	100339403	G1SVH9
ENSOCUG00000004024	2352.589082	2829.860967	1875.317196	0.66268881	-0.593596536	0.048002	1	16	62945260	62978616	-	1305	HSD11B1	GO:0003845;GO:0016491;GO:0016491;GO:0030324;GO:0055114;	K15680	EC:1.1.1.146	Q	1CYRT;KOG1205;0UQB3;1AWQ0;0V90S;0DPSN;0A24H;13NBT	hydroxysteroid 11-beta dehydrogenase 1 [Source:HGNC Symbol;Acc:HGNC:5208]	100342395	G1SKX6
ENSOCUG00000006288	290.8651485	360.5726679	221.157629	0.613351063	-0.705215032	0.04824153	1	GL018741	561251	707680	+	4702	NINL	GO:0005509;GO:0005509;GO:0005829;GO:0045171;GO:0005509;	K16477	-	S;Z	0DMIS;0VAVW;09ZZ7;0IEH8;1CWDY;1ATRJ;13KRS;0UJAJ	ninein like [Source:HGNC Symbol;Acc:HGNC:29163]	100341899	-
ENSOCUG00000017618	6.018028508	1.517012958	10.51904406	6.934050236	2.793698289	0.048274172	1	1	165605281	165667901	-	1860	SLC5A12	GO:0015129;GO:0016020;GO:0016020;GO:0016020;GO:0016021;GO:0022857;GO:0022857;GO:0035873;GO:0055085;GO:0055085;	K14388	-	P	0V7Q3;1ASBZ;1CSS0;KOG2349;0DI1C;0UKDM;12TWH;09WRQ	solute carrier family 5 member 12 [Source:HGNC Symbol;Acc:HGNC:28750]	100355433	G1TE25
ENSOCUG00000016771	168.4175009	125.2257068	211.609295	1.689823123	0.756872245	0.048352266	1	16	83706643	83713353	+	3243	PTGS2	GO:0001516;GO:0001516;GO:0001516;GO:0001516;GO:0004601;GO:0004601;GO:0004601;GO:0004666;GO:0004666;GO:0004666;GO:0004666;GO:0004666;GO:0005737;GO:0005737;GO:0005737;GO:0005783;GO:0005783;GO:0005789;GO:0006629;GO:0006631;GO:0006633;GO:0006693;GO:0006954;GO:0006954;GO:0006979;GO:0006979;GO:0007566;GO:0008217;GO:0008217;GO:0008217;GO:0008217;GO:0016020;GO:0016491;GO:0019371;GO:0019371;GO:0019371;GO:…	K11987	EC:1.14.99.1	S;U	0V8DS;0UPC7;09YZ0;KOG2408;0DP9V;1CY7W;12RSZ;1AYYI	Oryctolagus cuniculus prostaglandin-endoperoxide synthase 2 (PTGS2), mRNA. [Source:RefSeq mRNA;Acc:NM_001082388]	100009248	O02768
ENSOCUG00000034139	26.86686037	14.53786136	39.19585939	2.696122794	1.430886205	0.048375522	1	GL018951	87328	91761	+	1347	TUBA3D	GO:0003924;GO:0005200;GO:0005525;GO:0005874;GO:0007017;GO:0015630;GO:0003924;GO:0005200;GO:0005525;GO:0005874;GO:0007017;	-	-	-	-	tubulin alpha 3d [Source:HGNC Symbol;Acc:HGNC:24071]	-	-
ENSOCUG00000015924	379.3014494	461.2336572	297.3692416	0.644725807	-0.633242363	0.04846889	1	9	6675007	6697311	+	4402	MCM2	GO:0000166;GO:0003677;GO:0003677;GO:0003677;GO:0003678;GO:0004386;GO:0005524;GO:0005524;GO:0005524;GO:0005634;GO:0005634;GO:0005634;GO:0006260;GO:0006260;GO:0006260;GO:0006270;GO:0006270;GO:0016787;GO:0032508;GO:0042555;GO:0042555;GO:1905775;GO:1905775;GO:0000785;GO:0003677;GO:0003688;GO:0005524;GO:0005634;GO:0005634;GO:0005634;GO:0005654;GO:0005664;GO:0005737;GO:0006260;GO:0006268;GO:0006270;GO:…	K02540	EC:3.6.4.12	L	12NMS;0VB69;1B39U;0UFCG;KOG0477;0DQBE;0A0AA;1CZDC	minichromosome maintenance complex component 2 [Source:HGNC Symbol;Acc:HGNC:6944]	100337896	-
ENSOCUG00000014355	1909.191946	1519.595969	2298.787923	1.512762583	0.597185585	0.048488572	1	16	65323839	65345985	-	4285	PFKFB2	GO:0003824;GO:0003824;GO:0003873;GO:0003873;GO:0005524;GO:0005524;GO:0006000;GO:0006000;GO:0006003;GO:0006003;GO:0046835;GO:0003824;GO:0003824;GO:0003873;GO:0003873;GO:0003873;GO:0005524;GO:0005524;GO:0005654;GO:0006000;GO:0006000;GO:0006003;GO:0006003;GO:0006096;GO:0019901;GO:0046835;GO:0003824;GO:0003873;GO:0005524;GO:0006000;GO:0006003;GO:0003824;GO:0003873;GO:0005524;GO:0006000;GO:0006003;GO:…	K19029	-	G	1CUMN;0UGYH;1ATDA;09UK4;0DFVS;12R0U;0V5JD;KOG0234	6-phosphofructo-2-kinase/fructose-2,6-biphosphatase 2 [Source:HGNC Symbol;Acc:HGNC:8873]	100344174	-
ENSOCUG00000015211	49.46244304	89.22043627	9.704449811	0.108769361	-3.200655875	0.048649128	1	8	39413835	39994073	-	5175	ATP8A2	GO:0000166;GO:0000166;GO:0000166;GO:0000287;GO:0000287;GO:0000287;GO:0005524;GO:0005524;GO:0005524;GO:0005654;GO:0005794;GO:0005886;GO:0015914;GO:0015914;GO:0016020;GO:0016021;GO:0016021;GO:0016021;GO:0140326;GO:0140326;GO:0140326;GO:0140331;GO:0000166;GO:0000287;GO:0005524;GO:0015914;GO:0016021;GO:0140326;	K14802	EC:7.6.2.1	P	1BBIR;0WJ4Q;0V3W5;13G3I;0B6EH;0E9IA;0ITKD;1DGDD	ATPase phospholipid transporting 8A2 [Source:HGNC Symbol;Acc:HGNC:13533]	100358874	-
ENSOCUG00000007499	230.0048528	283.1695779	176.8401277	0.624502565	-0.679220598	0.04895806	1	3	10510934	10626359	+	2388	LMNB1	GO:0003690;GO:0005634;GO:0005634;GO:0005635;GO:0005635;GO:0005637;GO:0005638;GO:0005654;GO:0005882;GO:0016363;GO:0031965;GO:0043274;GO:1990837;	K07611	-	Z;D;Y	1CRS3;0V6SA;12PTX;0US7C;09VTI;0DH1W;KOG0977;1B290	lamin B1 [Source:HGNC Symbol;Acc:HGNC:6637]	100346094	G1ST69
ENSOCUG00000010810	379.6504898	291.9480984	467.3528812	1.600808102	0.678800374	0.049052061	1	16	60589757	60600979	-	477	NENF	GO:0005615;GO:0005654;GO:0007165;GO:0008083;GO:0032099;GO:0043410;	-	-	S;H	KOG1110;0DTTX;1B5WW;0A6V6;1D3VT;0UVIW;13PP0;0VIM1	neudesin neurotrophic factor [Source:HGNC Symbol;Acc:HGNC:30384]	-	-
ENSOCUG00000008357	18.5418698	26.73446041	10.34927919	0.387113824	-1.369170268	0.049063985	1	12	120575323	120576798	+	1476	TMEM200A	GO:0016020;GO:0016021;	-	-	S	09UXE;12P07;0V5X8;KOG4823;1CQWF;0UHVG;0DG6W;1ATTH	transmembrane protein 200A [Source:HGNC Symbol;Acc:HGNC:21075]	100352511	G1TI22
ENSOCUG00000026368	4.241777732	7.824393263	0.659162201	0.084244513	-3.569273463	0.049090808	1	GL018718	3907998	3914648	+	2177	-	GO:0005520;GO:0005520;GO:0005576;GO:0005576;GO:0005520;GO:0005576;	-	-	-	-	-	-	-
ENSOCUG00000004896	559.8003521	438.5469412	681.053763	1.552978026	0.635037416	0.04916304	1	GL018801	623896	654606	+	2172	TRMT1L	GO:0000049;GO:0003676;GO:0003676;GO:0003723;GO:0003723;GO:0003723;GO:0004809;GO:0004809;GO:0004809;GO:0008033;GO:0008033;GO:0008033;GO:0008168;GO:0016740;GO:0030488;GO:0032259;GO:0003676;GO:0003723;GO:0004809;GO:0008033;	-	-	J	1AWBN;1CT3Z;KOG1253;0DEU3;0VAD3;09ZG1;12TPU;0UKVK	tRNA methyltransferase 1 like [Source:HGNC Symbol;Acc:HGNC:16782]	100345036	-
ENSOCUG00000014442	71.59030883	49.88750831	93.29310934	1.870069532	0.903091913	0.049219655	1	12	10914361	10915711	-	666	H1-4	GO:0000786;GO:0000786;GO:0003677;GO:0003677;GO:0003677;GO:0005634;GO:0005634;GO:0005634;GO:0005634;GO:0005694;GO:0005720;GO:0006334;GO:0006334;GO:0031490;	-	-	B	0VJ77;0DUX5;13SKK;1B6G2;1D483;0A8BF;0UVWY;KOG4012	Histone H1.4 [Source:UniProtKB/Swiss- Prot;Acc:P02252]	-	-
ENSOCUG00000011956	7.250405345	2.612789869	11.88802082	4.549933756	2.185845541	0.049352293	1	3	57070111	57097056	+	4852	CDHR2	GO:0005509;GO:0005509;GO:0005886;GO:0005886;GO:0005903;GO:0007155;GO:0007155;GO:0007156;GO:0007156;GO:0016020;GO:0016020;GO:0016020;GO:0016021;GO:0016324;GO:0030855;GO:0031526;GO:0031528;GO:0032532;GO:0044214;GO:0044331;GO:0050839;GO:0060243;GO:0090675;	K16502	-	Z;U	09VQ5;13HFN;1B3H7;0DGYT;KOG3594;1CRP1;0V6P7;0UIY3	cadherin related family member 2 [Source:HGNC Symbol;Acc:HGNC:18231]	100340222	-
ENSOCUG00000010129	139.5725192	104.876012	174.2690264	1.661667172	0.732631443	0.049440624	1	GL018735	1741445	1763852	-	1781	SLC46A3	GO:0005887;GO:0055085;GO:0005887;GO:0016020;GO:0016021;GO:0055085;GO:0055085;	K20840	-	O;G	0UFQT;0DEQE;09TD6;1B1TY;KOG2816;13H6S;0V4C9;1CPE5	solute carrier family 46 member 3 [Source:HGNC Symbol;Acc:HGNC:27501]	100343853	G1SYM5
ENSOCUG00000008443	107.2870641	135.8765192	78.69760895	0.579184758	-0.787904457	0.049540543	1	15	14183956	14366670	-	2386	DCLK2	GO:0004672;GO:0005524;GO:0006468;GO:0035556;GO:0004672;GO:0005524;GO:0006468;GO:0035556;GO:0004672;GO:0004672;GO:0005524;GO:0005524;GO:0006468;GO:0006468;GO:0035556;GO:0035556;GO:0004672;GO:0005524;GO:0006468;GO:0035556;	K08805	EC:2.7.11.1	-	-	doublecortin like kinase 2 [Source:HGNC Symbol;Acc:HGNC:19002]	100356475	-
ENSOCUG00000008656	147.6876641	185.8817558	109.4935724	0.589049592	-0.763538995	0.049657552	1	13	75602342	75621288	-	1879	-	GO:0000166;GO:0003924;GO:0003924;GO:0005525;GO:0005525;GO:0005525;	K20898	-	S;K	0V5RR;0DG1U;09US8;1ASMB;KOG2037;1CQRC;0UHMY;13NFW	-	100349257	G1SVL5
ENSOCUG00000002628	1074.06952	551.3531165	1596.785923	2.896122059	1.534122407	0.049795375	1	21	5516324	5519716	+	2710	SDF2L1	GO:0016020;GO:0016020;GO:0034663;	-	-	O	13Q68;1AS8G;1CQHP;0DFU8;0UGG4;0V71R;09UIN;KOG3358	stromal cell derived factor 2 like 1 [Source:HGNC Symbol;Acc:HGNC:10676]	100344259	G1SHY4
ENSOCUG00000015570	448.6480367	355.0843646	542.2117088	1.526994041	0.610694432	0.05005352	1	GL018702	2720600	2999547	+	10311	FRY	GO:0000902;GO:0000902;GO:0000902;GO:0000902;GO:0000902;GO:0004857;GO:1904428;GO:0000902;	-	-	S	0DMBN;0URTV;KOG1825;09ZTF;12QYI;1B53I;1CW6T;0V7IK	FRY microtubule binding protein [Source:HGNC Symbol;Acc:HGNC:20367]	100355827	-
ENSOCUG00000014450	10.26067139	16.38199074	4.139352041	0.252676986	-1.984633827	0.050135994	1	2	115394062	115501161	+	2425	ADD2	GO:0005856;GO:0003779;GO:0005200;GO:0005856;GO:0005856;GO:0007416;GO:0008290;GO:0014069;GO:0016020;GO:0019901;GO:0030097;GO:0030507;GO:0031410;GO:0032092;GO:0042803;GO:0044853;GO:0046982;GO:0050900;GO:0050901;GO:0051015;GO:0051016;GO:0051017;GO:0065003;	K18622	-	Z;T	0V6HK;KOG3699;1AW0P;1CRRT;12P0M;0UNQF;0DH1I;09VT8	adducin 2 [Source:HGNC Symbol;Acc:HGNC:244]	100348972	G1T7F5
ENSOCUG00000006565	597.5501582	472.2437039	722.8566125	1.530685547	0.614177937	0.050273147	1	10	8007076	8054769	-	2201	FAM126A	GO:0005829;GO:0005886;GO:0042552;GO:0043005;GO:0046854;GO:0072659;	K21844	-	T	KOG4688;0V87J;1CTB8;12SDM;0UM2V;09X90;1AWKZ;0DIKE	family with sequence similarity 126 member A [Source:HGNC Symbol;Acc:HGNC:24587]	100338239	G1SR93
ENSOCUG00000026736	26.34078756	36.78361031	15.89796481	0.432202404	-1.210220998	0.050413338	1	19	37496947	37508002	-	1519	SGCA	GO:0005509;GO:0005509;GO:0005886;GO:0005911;GO:0016011;GO:0016012;GO:0016012;GO:0016012;GO:0016020;GO:0016020;GO:0016020;GO:0016021;GO:0042383;GO:0045121;	-	-	S;W	1ARTV;0VC9K;12Z33;0A32E;0UQE6;0DRKI;KOG4482;1D0QJ	sarcoglycan alpha [Source:HGNC Symbol;Acc:HGNC:10805]	-	-
ENSOCUG00000003212	539.8676339	304.6601236	775.0751442	2.544064957	1.347135507	0.050583331	1	2	70266504	70392428	-	909	TUSC3	GO:0008250;GO:0015095;GO:0015693;GO:0016020;GO:0016021;GO:0018279;GO:0050890;GO:1903830;	K12669	-	O	12PVH;1AYCT;0UREM;09WDR;0V7C3;0DJ30;KOG2603;1CTUS	tumor suppressor candidate 3 [Source:HGNC Symbol;Acc:HGNC:30242]	100341242	-
ENSOCUG00000013043	393.8865794	476.9604331	310.8127256	0.65165306	-0.617824017	0.050676157	1	17	24333384	24375576	+	2383	MYEF2	GO:0000981;GO:0000981;GO:0003676;GO:0003676;GO:0003697;GO:0003697;GO:0003723;GO:0006357;GO:0000981;GO:0003676;GO:0003697;	-	-	A;K	1CVA3;12N4V;0IKNU;1AZ0R;0DK6Y;09YSD;0V9Q9;0UPDU	myelin expression factor 2 [Source:HGNC Symbol;Acc:HGNC:17940]	100346905	-
ENSOCUG00000015018	954.4385965	752.8764303	1156.000763	1.535445548	0.61865735	0.050714575	1	GL019017	174501	224711	+	4359	PACSIN2	GO:0005515;GO:0030036;GO:0030036;GO:0070836;GO:0070836;GO:0097320;GO:0097320;GO:0005515;GO:0030036;GO:0070836;GO:0097320;GO:0005515;GO:0005829;GO:0005886;GO:0005901;GO:0016607;GO:0030036;GO:0036010;GO:0042802;GO:0043231;GO:0055038;GO:0070300;GO:0070836;GO:0070836;GO:0072584;GO:0097320;GO:0097320;	K20123	-	Z	0DEUP;09UP0;12R03;1B0NX;0UK6J;KOG2856;0V5NJ;1CPID	protein kinase C and casein kinase substrate in neurons 2 [Source:HGNC Symbol;Acc:HGNC:8571]	100339444	G1T8K2
ENSOCUG00000001920	1157.734284	920.2749269	1395.193641	1.516061776	0.600328542	0.050759288	1	6	8384720	8405856	+	3160	GPRC5B	GO:0004930;GO:0004930;GO:0007186;GO:0007186;GO:0016020;GO:0016021;GO:0016021;GO:0016021;GO:0004930;GO:0005654;GO:0005730;GO:0005829;GO:0005886;GO:0007186;GO:0016021;GO:0030295;GO:0043231;GO:0070062;	K04619	-	T	0IE42;1AZ3S;0DR0W;0A1YX;1D053;0VC70;0UMY9;13J64	G protein-coupled receptor class C group 5 member B [Source:HGNC Symbol;Acc:HGNC:13308]	100353261	-
ENSOCUG00000002230	3059.148007	2442.087624	3676.20839	1.505354826	0.590103583	0.050935338	1	AAGW02081305	21521	24200	-	1367	-	GO:0004364;GO:0004364;GO:0005515;GO:0004364;GO:0005515;GO:0004364;GO:0005515;	K23790	EC:2.5.1.18	O	13P23;1AZJ4;1D230;KOG1695;0VFXY;0UPD8;0A5E1;0DK8F	-	100342268	G1U9R0
ENSOCUG00000008745	137.0294464	103.6979433	170.3609494	1.642857553	0.716207394	0.051005834	1	GL018813	177632	192293	+	2598	-	-	K10837	EC:2.7.1.164	S	0VB8X;KOG4622;0UISG;1B2UB;1CZ6R;0DQ5F;13MCR;0A2HU	-	103345569	-
ENSOCUG00000008600	24.31828473	13.2977039	35.33886555	2.657516352	1.410078569	0.05105476	1	GL018792	120305	124288	-	1265	FPR1	GO:0001664;GO:0004930;GO:0004930;GO:0004930;GO:0004982;GO:0004982;GO:0004982;GO:0007165;GO:0007186;GO:0007186;GO:0007186;GO:0007200;GO:0016020;GO:0016021;GO:0016021;GO:0016021;	K04172	-	T	09YRX;1CTRF;0DNT1;0II0H;1AX0S;13FV7;0UP03;0V7XT	Oryctolagus cuniculus formyl peptide receptor 1 (FPR1), mRNA. [Source:RefSeq mRNA;Acc:NM_001082314]	100009153	Q05394
ENSOCUG00000002929	104.4394606	76.70609986	132.1728214	1.723107049	0.785012332	0.051355528	1	13	139122059	139133681	-	2220	CATSPER4	GO:0001669;GO:0005216;GO:0005216;GO:0005227;GO:0005227;GO:0005245;GO:0006811;GO:0006811;GO:0006814;GO:0016020;GO:0016020;GO:0016020;GO:0016021;GO:0030317;GO:0030317;GO:0030317;GO:0034220;GO:0036128;GO:0036128;GO:0036128;GO:0048240;GO:0055085;GO:0055085;GO:0070588;GO:0097228;GO:0098655;	K16892	-	-	-	cation channel sperm associated 4 [Source:HGNC Symbol;Acc:HGNC:23220]	100345860	G1SIM8
ENSOCUG00000003610	2.509312895	5.018625789	0	0	-Inf	0.051371415	1	13	23317108	23340716	+	2453	FMO3	GO:0004497;GO:0004499;GO:0004499;GO:0004499;GO:0005783;GO:0005789;GO:0016020;GO:0016021;GO:0016491;GO:0031090;GO:0034899;GO:0043231;GO:0050660;GO:0050660;GO:0050661;GO:0050661;GO:0055114;GO:0055114;GO:0055114;	K00485	EC:1.14.13.8	Q	09Y1K;0UMXY;12SFZ;1AT2V;KOG1399;1CWF5;0V6D1;0DMJV	Oryctolagus cuniculus flavin containing dimethylaniline monoxygenase 3 (FMO3), mRNA. [Source:RefSeq mRNA;Acc:NM_001082246]	100009065	P32417
ENSOCUG00000000597	44.44234428	58.59522842	30.28946013	0.516927077	-0.951967322	0.051563875	1	20	3803060	4432608	-	2793	-	GO:0000724;GO:0003677;GO:0005524;GO:0006281;GO:0008094;GO:0033063;GO:0000724;GO:0000724;GO:0003677;GO:0003677;GO:0005524;GO:0005524;GO:0006281;GO:0006281;GO:0008094;GO:0008094;GO:0033063;GO:0033063;GO:0000724;GO:0003677;GO:0006281;GO:0033063;	-	-	L	1CQT8;09XMR;0DIZG;1B1AS;KOG1433;0V8JI;13M2F;0UMMX	-	-	-
ENSOCUG00000003362	126.6418312	80.22034895	173.0633134	2.157349297	1.109259782	0.051661197	1	3	767066	839390	+	6157	LVRN	GO:0004177;GO:0006508;GO:0006508;GO:0006508;GO:0008233;GO:0008237;GO:0008237;GO:0008237;GO:0008270;GO:0008270;GO:0008270;GO:0016787;GO:0046872;GO:0006508;GO:0008237;GO:0008270;GO:0006508;GO:0008237;GO:0008270;	K13724	EC:3.4.11.-	O;E	KOG1046;0DFDN;09U40;0V532;12P0W;1AUW7;1CQ3E;0UJMP	laeverin [Source:HGNC Symbol;Acc:HGNC:26904]	100353757	-
ENSOCUG00000022146	20.59517156	8.921588064	32.26875505	3.6169295	1.854765478	0.051914692	1	9	25958474	25960178	-	630	-	-	-	-	-	-	-	-	-
ENSOCUG00000003689	5920.371038	3280.251607	8560.490469	2.609705441	1.383886978	0.05199721	1	17	70920081	70996217	-	4251	NID2	GO:0005509;GO:0005509;GO:0007160;GO:0007160;GO:0005509;GO:0005509;GO:0005604;GO:0005604;GO:0005886;GO:0007160;GO:0007160;GO:0031012;	K06826	-	T	14SX9;0V0U0;0KCRK;1DCB1;0AZSV;0WC96;1B9T6;0E5AZ	nidogen 2 [Source:HGNC Symbol;Acc:HGNC:13389]	100347682	-
ENSOCUG00000005519	27.7438151	16.87437805	38.61325214	2.288277057	1.194261739	0.05214517	1	12	25794976	25808030	+	2692	ARMC12	GO:0005576;GO:0005576;GO:0007586;GO:0007586;GO:0008047;GO:0008047;GO:0016042;GO:0016042;GO:0043085;GO:0005576;GO:0007586;GO:0008047;GO:0016042;	-	-	S	0IJFF;0DR8M;0VEGN;1B25F;0UU8Z;0A3MQ;13HKM;1D0DV	armadillo repeat containing 12 [Source:HGNC Symbol;Acc:HGNC:21099]	-	-
ENSOCUG00000004788	377.8210802	280.2562677	475.3858927	1.696254277	0.762352453	0.052201918	1	19	43921607	43922209	+	603	ARL4D	GO:0000166;GO:0005525;GO:0005525;GO:0005525;GO:0005634;GO:0005737;GO:0005886;	K07945	-	U	1ASV1;0V43R;09T4Z;13HGD;KOG0070;0DEG6;0UFE0;1CP5V	ADP ribosylation factor like GTPase 4D [Source:HGNC Symbol;Acc:HGNC:656]	100355481	G1SMI8
ENSOCUG00000035573	188.3933647	142.8089101	233.9778193	1.638397906	0.712285777	0.052299348	1	10	30782778	31002534	-	741	UMAD1	GO:0000813;	-	-	-	-	UBAP1-MVB12-associated (UMA) domain containing 1 [Source:HGNC Symbol;Acc:HGNC:48955]	-	-
ENSOCUG00000006473	948.063128	746.7133527	1149.412903	1.539296035	0.622270715	0.052574848	1	14	105427240	105479300	-	2371	ATP6V1A	GO:0005524;GO:0005524;GO:0005623;GO:0005829;GO:0005886;GO:0005902;GO:0006879;GO:0016324;GO:0033180;GO:0033180;GO:0036295;GO:0046034;GO:0046034;GO:0046961;GO:0046961;GO:1902600;GO:1902600;	K02145	EC:7.1.2.2	C	1B171;12R0A;0UHFQ;KOG1352;09UMZ;0V5MJ;1CQMA;0DFXT	ATPase H+ transporting V1 subunit A [Source:HGNC Symbol;Acc:HGNC:851]	100347673	-
ENSOCUG00000017210	21.67870919	4.767398987	38.5900194	8.094564669	3.016953494	0.052785859	1	GL018760	1475124	1483716	-	1488	NPTX2	GO:0008306;GO:0098962;GO:0098978;	-	-	S	0DP0T;0IFFF;0VC8R;1CXYM;0UFKN;1B2FY;0A1D7;13K9U	neuronal pentraxin 2 [Source:HGNC Symbol;Acc:HGNC:7953]	-	-
ENSOCUG00000002396	4341.453378	3502.426037	5180.480719	1.479112097	0.564731393	0.052940767	1	15	62078368	62134878	-	4419	PKD2	GO:0001658;GO:0001889;GO:0001947;GO:0005102;GO:0005244;GO:0005245;GO:0005248;GO:0005249;GO:0005261;GO:0005262;GO:0005267;GO:0005509;GO:0005509;GO:0005509;GO:0005623;GO:0005737;GO:0005783;GO:0005789;GO:0005886;GO:0005887;GO:0005929;GO:0006816;GO:0007507;GO:0008092;GO:0009925;GO:0016020;GO:0016020;GO:0016020;GO:0016021;GO:0021510;GO:0021915;GO:0022843;GO:0030027;GO:0031587;GO:0031941;GO:0034703;GO:…	K04986	-	T;P	12Q2B;0V7NV;1AY0T;0UKC8;KOG3599;09WQC;1CSQT;0DEKN	polycystin 2, transient receptor potential cation channel [Source:HGNC Symbol;Acc:HGNC:9009]	100008872	G1SHG5
ENSOCUG00000003754	43.39189754	28.28184768	58.50194739	2.06853343	1.048608274	0.052960926	1	3	107547027	107697440	-	2804	RUNX1T1	GO:0003700;GO:0003714;GO:0006355;GO:0045892;GO:0003700;GO:0003714;GO:0006355;GO:0045892;GO:0003700;GO:0003700;GO:0003714;GO:0003714;GO:0006355;GO:0006355;GO:0045892;GO:0045892;GO:0046872;GO:0003700;GO:0003714;GO:0005654;GO:0006355;GO:0045892;GO:0003700;GO:0003714;GO:0006355;GO:0045892;	K10053	-	K	0IG1Z;0V6G7;1CRFN;09VGY;1B0MG;12RR0;0DFKI;0UJXI	RUNX1 partner transcriptional co-repressor 1 [Source:HGNC Symbol;Acc:HGNC:1535]	100354419	-
ENSOCUG00000007621	156.0928591	215.8885596	96.29715854	0.446050308	-1.16472166	0.052963872	1	1	142812850	142840632	-	1058	PLEKHB1	GO:0016021;GO:0016021;GO:0016021;GO:0016021;GO:0016021;GO:0016021;	K23857	-	T	13R6C;1CWY4;0UQKI;0IXBE;1AWEU;0VBB7;0DN1U;0A0EY	pleckstrin homology domain containing B1 [Source:HGNC Symbol;Acc:HGNC:19079]	100339448	-
ENSOCUG00000007932	439.4069405	343.5439208	535.2699601	1.55808305	0.639772135	0.053280361	1	GL018760	711616	724850	-	2273	ZNF655	GO:0003676;GO:0005634;GO:0005730;GO:0005737;GO:0006355;GO:2000134;GO:0003676;GO:0003676;GO:0003676;GO:0003676;GO:0006355;	-	-	K	1D2CQ;0VGN5;0DT1M;1B826;0A5SX;KOG1721;0UUV4;14471;0DPIY;1CTSQ;0USWM;0A1WU;142PU;0VCSC;KOG1721;1AT7V	zinc finger protein 655 [Source:HGNC Symbol;Acc:HGNC:30899]	-	-
ENSOCUG00000003404	3421.839222	2724.02539	4119.653054	1.512340182	0.596782692	0.053437028	1	11	29246701	29413831	+	5308	MAN2A1	GO:0003824;GO:0004559;GO:0005975;GO:0006013;GO:0030246;GO:0003824;GO:0003824;GO:0004559;GO:0004559;GO:0005975;GO:0005975;GO:0006013;GO:0006013;GO:0008152;GO:0016787;GO:0016798;GO:0030246;GO:0030246;GO:0046872;GO:0003824;GO:0004559;GO:0005975;GO:0006013;GO:0030246;GO:0000139;GO:0001701;GO:0001889;GO:0003824;GO:0004559;GO:0005615;GO:0005794;GO:0005797;GO:0005801;GO:0005975;GO:0006013;GO:0006491;GO:…	K01231	EC:3.2.1.114	G	0DM6C;0V9UI;0UQAF;09VYT;KOG1959;12QNA;1AZHX;1CW1I	mannosidase alpha class 2A member 1 [Source:HGNC Symbol;Acc:HGNC:6824]	100350334	-
ENSOCUG00000008513	3425.455984	2752.730742	4098.181227	1.488769375	0.574120284	0.053471494	1	19	22093785	22464899	-	3920	MYO1D	GO:0000166;GO:0003774;GO:0003774;GO:0003774;GO:0003779;GO:0005515;GO:0005524;GO:0005524;GO:0005524;GO:0005903;GO:0010923;GO:0016459;GO:0016459;GO:0016459;GO:0019904;GO:0030424;GO:0043005;GO:0043025;GO:0043209;GO:0051641;	K10356	-	-	-	myosin ID [Source:HGNC Symbol;Acc:HGNC:7598]	100354887	-
ENSOCUG00000031409	2055.985043	1623.307619	2488.662467	1.533081246	0.616434155	0.053475642	1	6	27188476	27193370	-	1382	PCOLCE	GO:0005515;GO:0005518;GO:0005518;GO:0005615;GO:0006508;GO:0008201;GO:0008201;GO:0016504;GO:0016504;GO:1990830;	-	-	-	-	procollagen C-endopeptidase enhancer [Source:HGNC Symbol;Acc:HGNC:8738]	-	-
ENSOCUG00000002790	4248.908839	3445.842336	5051.975342	1.466107514	0.551990905	0.053479767	1	GL018741	860625	903547	-	2711	PYGB	GO:0004645;GO:0004645;GO:0004645;GO:0005737;GO:0005975;GO:0005975;GO:0005975;GO:0008184;GO:0008184;GO:0016740;GO:0016757;GO:0030170;GO:0030170;GO:0102250;GO:0102499;	K00688	EC:2.4.1.1	G	0UFQB;0DEQ1;KOG2099;09TCR;12N63;1CPDR;0V4BV;1AXH4	glycogen phosphorylase B [Source:HGNC Symbol;Acc:HGNC:9723]	100342407	-
ENSOCUG00000010469	762.0088999	924.2744633	599.7433364	0.648880133	-0.6239761	0.053480024	1	GL018715	2242463	2450617	+	4948	SLC22A23	GO:0016021;GO:0022857;GO:0055085;GO:0016021;GO:0022857;GO:0055085;GO:0016021;GO:0022857;GO:0055085;GO:0016020;GO:0016021;GO:0016021;GO:0016021;GO:0022857;GO:0022857;GO:0055085;GO:0055085;	K08215	-	I;P;U	13E77;0V3DV;1BB6S;KOG0255;0B55F;0E8QW;0WHRJ;1DFN2	solute carrier family 22 member 23 [Source:HGNC Symbol;Acc:HGNC:21106]	100349104	G1U7E7
ENSOCUG00000012328	685.8602935	510.4971915	861.2233955	1.687028665	0.754484487	0.053500256	1	X	55259457	55368328	+	1717	RNF128	GO:0005770;GO:0005783;GO:0005794;GO:0016020;GO:0016021;GO:0016567;GO:0031647;GO:0042036;GO:0061630;	K10629	EC:2.3.2.27	O	1AWBI;0V9V0;KOG4628;1CV6B;09YX9;0UP9S;0DKCD;12TNZ	ring finger protein 128 [Source:HGNC Symbol;Acc:HGNC:21153]	100346749	G1T331
ENSOCUG00000015049	228.3531879	282.9005912	173.8057846	0.614370524	-0.702819093	0.053585799	1	1	192022141	192104345	+	5159	DTX4	GO:0007219;GO:0008270;GO:0016567;GO:0046872;GO:0007219;GO:0007219;GO:0008270;GO:0016567;GO:0016567;GO:0046872;GO:0046872;GO:0046872;	K06058	EC:2.3.2.27	O	1CPJ6;0V4HT;139G2;1B3TT;0IEMS;0UNT1;09TIV;0DEVG	deltex E3 ubiquitin ligase 4 [Source:HGNC Symbol;Acc:HGNC:29151]	100346085	-
ENSOCUG00000015498	102.9678609	129.1510552	76.78466662	0.594533792	-0.750169282	0.053649854	1	20	15539778	15711843	+	624	EFCAB11	GO:0005509;GO:0005509;	-	-	T	13QPX;0A4XC;0VHFY;0USDG;1B5SZ;1D1MU;0DSCD;KOG0027	EF-hand calcium binding domain 11 [Source:HGNC Symbol;Acc:HGNC:20357]	-	-
ENSOCUG00000000347	1383.741164	1005.99498	1761.487348	1.750990196	0.808171006	0.05371321	1	13	37518669	37522534	+	521	-	GO:0016020;GO:0016021;	-	-	S	1D35W;1B5DV;0VHP1;0DTTR;13UJU;KOG4615;0A6UW;0UV6E	-	-	-
ENSOCUG00000030224	14.32666482	21.46460781	7.188721828	0.334910467	-1.578152629	0.053766592	1	19	44509169	44509351	-	183	-	-	-	-	-	-	-	-	-
ENSOCUG00000016559	707.54466	562.6160539	852.473266	1.515195416	0.599503871	0.053777441	1	1	64143220	64341060	-	1363	GNAQ	GO:0000166;GO:0001664;GO:0001664;GO:0003924;GO:0003924;GO:0005096;GO:0005525;GO:0006469;GO:0007165;GO:0007165;GO:0007165;GO:0007186;GO:0007186;GO:0019001;GO:0019001;GO:0031683;GO:0031683;GO:0043547;GO:0050821;GO:0060828;GO:0001664;GO:0003924;GO:0007165;GO:0007186;GO:0019001;GO:0031683;	K04634	-	T	0UGNW;09V84;1CR6C;12QYR;KOG0085;1ARZD;0V67M;0DGGR	G protein subunit alpha q [Source:HGNC Symbol;Acc:HGNC:4390]	100340719	-
ENSOCUG00000007931	64.83856315	46.00302203	83.67410427	1.818882773	0.863052564	0.053887887	1	GL018806	736867	740091	-	3225	-	GO:0046983;	-	-	-	-	-	-	-
ENSOCUG00000027617	211.9092096	162.6828615	261.1355576	1.605181733	0.682736643	0.053893169	1	GL019085	3312	113367	-	2628	-	-	-	-	T	KOG2283;0W0BG;14FCB	-	-	-
ENSOCUG00000026152	617.6667645	755.9698392	479.3636898	0.634104252	-0.657208043	0.053930106	1	3	57967267	57977467	-	1904	DBN1	GO:0001701;GO:0003779;GO:0003779;GO:0005623;GO:0005737;GO:0005856;GO:0005886;GO:0005911;GO:0005921;GO:0007015;GO:0007015;GO:0007015;GO:0010643;GO:0010644;GO:0014069;GO:0015629;GO:0016020;GO:0030425;GO:0030426;GO:0031915;GO:0032507;GO:0045211;GO:0048699;GO:0051220;GO:0061003;GO:0061351;GO:0098978;GO:0099524;GO:1902685;	-	-	Z	KOG3655;1AVQE;0DJ1P;09XPX;12RXN;0V8FY;0UMQH;1CTT7	drebrin 1 [Source:HGNC Symbol;Acc:HGNC:2695]	-	-
ENSOCUG00000014683	68.34032225	48.6065739	88.0740706	1.811978577	0.857565898	0.054051247	1	14	81467653	81479624	-	4017	VWA5B2	-	-	-	S	0V6M3;1CRKQ;0IFPF;1AUHX;12U4G;09VMZ;0UIUJ;0DGWF	von Willebrand factor A domain containing 5B2 [Source:HGNC Symbol;Acc:HGNC:25144]	100349680	-
ENSOCUG00000000621	630.3101047	865.2497042	395.3705052	0.45694382	-1.129911294	0.054431553	1	10	24692312	24708914	-	1721	INHBA	GO:0000082;GO:0001541;GO:0001707;GO:0001942;GO:0002244;GO:0002244;GO:0005102;GO:0005125;GO:0005179;GO:0005179;GO:0005576;GO:0005576;GO:0005576;GO:0005576;GO:0006357;GO:0007050;GO:0008083;GO:0008083;GO:0008083;GO:0008285;GO:0008584;GO:0010628;GO:0010862;GO:0017046;GO:0021773;GO:0030308;GO:0032270;GO:0032924;GO:0035987;GO:0042476;GO:0042493;GO:0042541;GO:0042701;GO:0042802;GO:0043509;GO:0043512;GO:…	-	-	-	-	inhibin subunit beta A [Source:HGNC Symbol;Acc:HGNC:6066]	-	-
ENSOCUG00000032312	398.1993285	479.2524237	317.1462333	0.661751965	-0.59563752	0.054435209	1	20	25107107	25116718	+	171	-	-	-	-	-	-	-	-	-
ENSOCUG00000016147	159.0190163	196.4211372	121.6168955	0.619163992	-0.691606522	0.054450379	1	17	7271874	7290697	+	1090	MTFMT	GO:0003824;GO:0003824;GO:0004479;GO:0004479;GO:0006413;GO:0009058;GO:0009058;GO:0016742;GO:0016742;GO:0071951;GO:0071951;	K00604	EC:2.1.2.9	-	-	mitochondrial methionyl-tRNA formyltransferase [Source:HGNC Symbol;Acc:HGNC:29666]	100350839	-
ENSOCUG00000008247	12487.46744	9953.613564	15021.32132	1.509132459	0.59371944	0.054623816	1	3	95775579	95892930	-	4390	TPD52	GO:0005509;GO:0005737;GO:0005783;GO:0030183;GO:0042803;GO:0048471;	-	-	S;J	0VCUE;KOG4010;0DI9G;0UI6E;1CYK3;0A1Z9;1B372;13JW1	tumor protein D52 [Source:HGNC Symbol;Acc:HGNC:12005]	-	-
ENSOCUG00000023000	40.66652766	53.74494801	27.5881073	0.513315359	-0.962082666	0.054654205	1	GL018791	191425	202581	+	2629	ARHGEF19	GO:0005085;GO:0005515;GO:0032956;GO:0042060;GO:0043547;	-	-	T	KOG3523;1CVF5;09UGY;12NRK;0DKKQ;0UITJ;0V5G9;1AWWB	Rho guanine nucleotide exchange factor 19 [Source:HGNC Symbol;Acc:HGNC:26604]	-	-
ENSOCUG00000006928	2976.73062	1862.563045	4090.898195	2.196381059	1.135128375	0.054762532	1	GL018723	2070832	2075830	-	661	XBP1	GO:0000978;GO:0000981;GO:0000987;GO:0001525;GO:0001889;GO:0001935;GO:0002070;GO:0002639;GO:0003700;GO:0003700;GO:0003700;GO:0005623;GO:0005634;GO:0005783;GO:0006355;GO:0006355;GO:0006511;GO:0006990;GO:0008284;GO:0010506;GO:0030335;GO:0031017;GO:0031648;GO:0035356;GO:0035470;GO:0042149;GO:0042632;GO:0043066;GO:0043565;GO:0045348;GO:0045579;GO:0045582;GO:0045600;GO:0045766;GO:0045944;GO:0045944;GO:…	K09027	-	K	0UIFI;12SIN;1ATZI;0VB0V;0DMQB;KOG4005;1CWJV;0A04K	X-box binding protein 1 [Source:HGNC Symbol;Acc:HGNC:12801]	100339940	-
ENSOCUG00000005194	124.2805181	156.0789146	92.4821216	0.592534372	-0.755029251	0.054825103	1	13	40286174	40311776	+	678	-	-	-	-	S;P	KOG4781;09ZXI;13HXV;0VAU4;0UKUJ;0DMGC;1CWBQ;1B0F1	-	-	-
ENSOCUG00000027154	54.03100778	79.13847785	28.9235377	0.365480086	-1.452135295	0.05484832	1	GL019006	25317	33143	-	1487	CKM	GO:0000166;GO:0003824;GO:0003824;GO:0004111;GO:0004111;GO:0004111;GO:0005524;GO:0005615;GO:0016301;GO:0016301;GO:0016301;GO:0016310;GO:0016740;GO:0016772;GO:0016772;GO:0046314;GO:0046314;GO:0046314;GO:0000166;GO:0003824;GO:0003824;GO:0004111;GO:0004111;GO:0005524;GO:0016301;GO:0016301;GO:0016301;GO:0016310;GO:0016740;GO:0016772;GO:0016772;GO:0046314;GO:0046314;	K00933	EC:2.7.3.2	C	12SPN;1CWT1;0DMXA;1B3MD;0USN0;KOG3581;0VB6E;0A0AG	creatine kinase, M-type [Source:HGNC Symbol;Acc:HGNC:1994]	100009056	P00563
ENSOCUG00000009391	128.390542	98.10595862	158.6751253	1.617385198	0.693663314	0.054920035	1	GL018826	475460	488391	-	2106	-	GO:0004657;GO:0004657;GO:0006560;GO:0006562;GO:0006562;GO:0016491;GO:0055114;	K00318	EC:1.5.5.2	E	0DF0Q;KOG0186;1B1HY;0UG4V;09TQE;1CPQH;0V4PN;12S69	-	100352880	-
ENSOCUG00000010702	1089.125079	868.733923	1309.516235	1.507384713	0.592047667	0.054999121	1	20	31620204	31805981	+	2992	NUMB	GO:0005515;GO:0005515;GO:0005515;GO:0005634;GO:0005737;GO:0005769;GO:0007399;GO:0007405;GO:0007409;GO:0008013;GO:0016323;GO:0019897;GO:0021670;GO:0021849;GO:0030136;GO:0030335;GO:0030900;GO:0031410;GO:0034332;GO:0045177;GO:0045294;GO:0045296;GO:0050769;GO:0098978;GO:0099149;GO:1903077;GO:0005515;GO:0005515;	K06057	-	T	0V485;09T95;1B06P;0DGP6;12PKQ;1CRD0;0UGSI;KOG3537	NUMB endocytic adaptor protein [Source:HGNC Symbol;Acc:HGNC:8060]	100345271	-
ENSOCUG00000007379	734.3778259	886.2302063	582.5254456	0.657307144	-0.60536043	0.054999351	1	4	32988569	33010949	-	2099	KANSL2	GO:0000123;GO:0000123;GO:0000123;GO:0000123;GO:0005654;GO:0005829;GO:0005886;GO:0015629;GO:0043981;GO:0043982;GO:0043984;GO:0043995;GO:0043996;GO:0046972;	K18401	-	O;B	09ZQB;1CZ08;0DPZY;0II1C;0VD4T;0UMA1;12XCB;1AYN1	KAT8 regulatory NSL complex subunit 2 [Source:HGNC Symbol;Acc:HGNC:26024]	100349741	G1SSX8
ENSOCUG00000026164	390.2977684	307.0845133	473.5110234	1.541956702	0.624762255	0.055030097	1	GL018802	407157	413258	+	1116	CAMK1	GO:0000166;GO:0004672;GO:0004672;GO:0004674;GO:0005524;GO:0005524;GO:0005524;GO:0006468;GO:0006468;GO:0006468;GO:0006468;GO:0006913;GO:0007165;GO:0010976;GO:0032091;GO:0032880;GO:0033138;GO:0043393;GO:0045944;GO:0046827;GO:0046827;GO:0051147;GO:0051149;GO:0051835;GO:0060143;GO:0060999;GO:0071902;GO:1901985;	-	-	T	1CUAQ;0V83X;0UKNA;KOG0032;09X5B;1AZY0;0DH1M;12N56	calcium/calmodulin dependent protein kinase I [Source:HGNC Symbol;Acc:HGNC:1459]	-	-
ENSOCUG00000011606	224.8586718	172.3638794	277.3534642	1.609115931	0.686268271	0.055161657	1	21	3193730	3201978	+	3240	SLC35E4	GO:0016020;GO:0016021;	-	-	G	1CV8F;09YZG;0DKEF;KOG1441;0V9X2;1B3FA;13M59;0UJXR	solute carrier family 35 member E4 [Source:HGNC Symbol;Acc:HGNC:17058]	-	-
ENSOCUG00000009677	2836.280441	1970.45671	3702.104173	1.878805129	0.909815437	0.055261642	1	GL018924	159872	160948	-	1077	MYADM	GO:0001726;GO:0001933;GO:0005886;GO:0005911;GO:0010629;GO:0016020;GO:0016020;GO:0016020;GO:0016021;GO:0030335;GO:0030837;GO:0030864;GO:0031579;GO:0034115;GO:0045121;GO:0061028;GO:0072659;GO:0090038;GO:1900026;	-	-	V	KOG4788;0UKN4;1CXIG;0DNM7;13HUQ;0A0ZP;1AWGF;0VBW6	myeloid associated differentiation marker [Source:HGNC Symbol;Acc:HGNC:7544]	100328773	G1TKE5;B7NZS0
ENSOCUG00000015466	333.9265946	408.031759	259.8214302	0.636767665	-0.651161018	0.05541702	1	17	68782622	68789189	-	2373	-	GO:0005737;GO:0070286;	-	-	S	1BAIB;0AQSR;0W3BT;0E756;14DMS;0J35Q;1DE1B;0V24W	-	-	-
ENSOCUG00000005229	40.73675809	54.57227185	26.90124433	0.492947122	-1.020495198	0.055610809	1	13	120264767	120292492	-	2655	RAD54L	GO:0000724;GO:0000733;GO:0005524;GO:0005524;GO:0005654;GO:0006302;GO:0006974;GO:0008340;GO:0010212;GO:0032991;GO:0036310;GO:0042493;GO:0051276;GO:0005524;	K10875	EC:3.6.4.-	L	1AVQC;09XTC;0V8QW;1CZF2;0UQN1;12PSK;KOG0390;0DKJ5	RAD54 like [Source:HGNC Symbol;Acc:HGNC:9826]	100340671	G1SNH0
ENSOCUG00000001888	477.651743	577.9765061	377.32698	0.65284138	-0.61519559	0.055625711	1	15	49913458	49915074	+	722	-	GO:0000786;GO:0000786;GO:0000786;GO:0003677;GO:0003677;GO:0003677;GO:0005634;GO:0005634;GO:0005694;GO:0046982;GO:0046982;	-	-	B	0VHIR;1D32C;0A6QX;13RAK;0DTQG;0UV2R;KOG1757	-	-	-
ENSOCUG00000016021	36.11489986	49.37689826	22.85290146	0.46282578	-1.111458868	0.055878202	1	18	16603463	16669158	+	618	LRRC20	GO:0005515;	-	-	S	0UMKC;0DIY1;1CTPG;KOG4579;09XKD;13QUS;0V8I9;1AX2U	leucine rich repeat containing 20 [Source:HGNC Symbol;Acc:HGNC:23421]	100343161	-
ENSOCUG00000027879	739.2242214	225.3321028	1253.11634	5.561197558	2.475395589	0.055982265	1	12	140093284	140097009	+	881	-	-	K07986	-	S	1D436;0DUSB;13XQM;0A7HD;0J4VC;1B66M;0UVSK;0VJ2E	-	103349960	U3KPH0
ENSOCUG00000007798	202.5814283	252.3063618	152.8564948	0.605836863	-0.722998731	0.056074395	1	19	19713865	19719942	+	1909	SLC46A1	GO:0005737;GO:0005886;GO:0005887;GO:0008517;GO:0015078;GO:0015232;GO:0015884;GO:0015886;GO:0016020;GO:0016021;GO:0016021;GO:0016021;GO:0016324;GO:0016324;GO:0022857;GO:0022857;GO:0051958;GO:0055085;GO:0055085;GO:1902600;GO:1904447;GO:0005887;GO:0016021;GO:0022857;GO:0055085;	K14613	-	O;P	13IJ6;0DPM6;0UUD4;0VCUK;KOG2816;1CYK6;0A1ZE;1AWN5	solute carrier family 46 member 1 [Source:HGNC Symbol;Acc:HGNC:30521]	100009317	Q28720
ENSOCUG00000015552	103.7536116	134.7871518	72.72007135	0.539517828	-0.890257462	0.056180576	1	7	10622322	11050449	-	7098	PLXNA4	GO:0005515;GO:0007165;GO:0007165;GO:0016020;GO:0016021;GO:0017154;GO:0017154;GO:0071526;GO:0071526;GO:0005515;GO:0007165;GO:0007165;GO:0016020;GO:0016021;GO:0017154;GO:0017154;GO:0071526;GO:0071526;GO:0005515;GO:0007165;GO:0017154;GO:0071526;GO:0005515;GO:0007165;GO:0007399;GO:0007411;GO:0008045;GO:0017154;GO:0017154;GO:0021602;GO:0021610;GO:0021612;GO:0021615;GO:0021636;GO:0021637;GO:0021644;GO:…	K06820	-	T	12RMW;0UH91;1CQC8;09UD0;0V5C8;0DFNS;1AZU9;KOG3610	plexin A4 [Source:HGNC Symbol;Acc:HGNC:9102]	100346790	-
ENSOCUG00000014669	219.750399	269.9843647	169.5164334	0.627875002	-0.671450722	0.056226001	1	4	12374289	12383709	-	1494	TRMT6	GO:0005634;GO:0008033;GO:0030488;GO:0030488;GO:0031515;GO:0031515;GO:0031515;GO:0080009;	K03256	-	J	1D0SV;0VEV4;0DRJN;KOG1416;1B0ES;09ZVQ;12TV1;0UQNV	tRNA methyltransferase 6 [Source:HGNC Symbol;Acc:HGNC:20900]	100340902	G1TMV6
ENSOCUG00000003220	110.108442	140.5660916	79.65079232	0.566643003	-0.819488001	0.056497229	1	X	26982045	26983172	+	1128	GPR34	GO:0004930;GO:0004930;GO:0004930;GO:0007165;GO:0007186;GO:0007186;GO:0007186;GO:0016020;GO:0016021;GO:0016021;GO:0016021;	K08383	-	T	09W0W;12V1H;0UJCK;0DHA5;1CS01;1AUVU;0V6Z9;0IH53	G protein-coupled receptor 34 [Source:HGNC Symbol;Acc:HGNC:4490]	100352706	-
ENSOCUG00000027970	3252.703174	2606.671999	3898.734348	1.495675079	0.580796798	0.056551961	1	GL019419	21625	43933	+	2763	-	GO:0016020;GO:0016021;	-	-	W;U	0A7S0;0DUHI;0IXF7;13RGJ;0VIKF;1D3V9;1B5W3;0UVHR	-	-	-
ENSOCUG00000008140	78.80903803	54.92918027	102.6888958	1.869478032	0.902635518	0.056622909	1	13	80949075	81103810	+	3036	TTLL7	GO:0005524;GO:0005524;GO:0006464;GO:0006464;GO:0018095;GO:0043014;GO:0048487;GO:0070740;GO:0005524;GO:0006464;GO:0005524;GO:0006464;GO:0005524;GO:0006464;	K16583	EC:6.-.-.-	O	0V510;1CTRU;09VV2;KOG2158;1AXKP;12NV4;0DJ0E;0UMNX	tubulin tyrosine ligase like 7 [Source:HGNC Symbol;Acc:HGNC:26242]	100342462	G1SUJ9
ENSOCUG00000023887	4651.251679	3762.383416	5540.119941	1.472502754	0.558270332	0.056711466	1	16	65114547	65141637	-	3562	-	-	-	-	S;W	1AXRU;12TPM;09YR6;0UP2C;1CUZJ;0DK5R;0V9P3;0IEGQ	-	-	-
ENSOCUG00000013639	3782.74608	3021.185139	4544.307022	1.504147152	0.588945714	0.056721929	1	13	83203109	83394044	-	5226	ADGRL2	GO:0004888;GO:0004930;GO:0007166;GO:0007186;GO:0016020;GO:0016021;GO:0030246;GO:0004888;GO:0004930;GO:0007166;GO:0007186;GO:0016020;GO:0016021;GO:0030246;GO:0004888;GO:0004930;GO:0007166;GO:0007186;GO:0016020;GO:0016021;GO:0030246;GO:0004888;GO:0004888;GO:0004930;GO:0004930;GO:0004930;GO:0007165;GO:0007166;GO:0007166;GO:0007186;GO:0007186;GO:0007186;GO:0016020;GO:0016020;GO:0016020;GO:0016021;GO:…	K04593	-	W;T;U	1CSMA;12QTI;KOG4729;KOG3545;1B3EJ;09WM3;KOG4193;0DHWQ;0UJP1;0V66H	adhesion G protein-coupled receptor L2 [Source:HGNC Symbol;Acc:HGNC:18582]	100343149	-
ENSOCUG00000016914	47.70816093	62.27076055	33.1455613	0.532281299	-0.909739216	0.056732758	1	5	2419905	2427273	+	1768	SPRED3	GO:0007275;GO:0009966;GO:0016020;GO:0007275;GO:0007275;GO:0009966;GO:0009966;GO:0016020;GO:0016020;GO:0007275;GO:0009966;GO:0016020;	K04703	-	T	0WCJU;0E5JY;KOG4590;1B9YF;1DCJV;0V11P;14T8M;0B039	sprouty related EVH1 domain containing 3 [Source:HGNC Symbol;Acc:HGNC:31041]	100353838	G1U959
ENSOCUG00000000725	4.09319597	7.527229739	0.659162201	0.087570358	-3.513413584	0.056794683	1	9	48336915	48338153	-	1239	MC5R	GO:0004930;GO:0004930;GO:0004930;GO:0004977;GO:0004977;GO:0005886;GO:0007165;GO:0007186;GO:0007186;GO:0007186;GO:0007189;GO:0016020;GO:0016021;GO:0016021;GO:0016021;	K04203	-	T	KOG3656;0UGFJ;0DF8G;0V4XB;1CPY3;134RI;1B2TJ;09TYF	melanocortin 5 receptor [Source:HGNC Symbol;Acc:HGNC:6933]	100348068	-
ENSOCUG00000002949	367.9489456	254.2329657	481.6649254	1.894580917	0.921878758	0.05686414	1	18	27894281	27914118	-	2035	CISD1	GO:0043231;GO:0051537;GO:0016020;GO:0016021;GO:0043231;GO:0043231;GO:0051537;GO:0051537;GO:0005739;GO:0005739;GO:0005741;GO:0042802;GO:0043231;GO:0043457;GO:0051537;	K23885	-	S;O	0A7MM;0UVKQ;KOG3461;0VIG3;13WF9;1D3RJ;0DUE0;1B629	CDGSH iron sulfur domain 1 [Source:HGNC Symbol;Acc:HGNC:30880]	100355477	G1SIP6
ENSOCUG00000035934	7.004705146	2.537314401	11.47209589	4.521353715	2.176754787	0.056889752	1	16	20778484	20843156	+	3045	-	GO:0003777;GO:0005515;GO:0005524;GO:0007018;GO:0008017;	-	-	-	-	-	-	-
ENSOCUG00000017416	189.2984399	232.8962825	145.7005972	0.625602932	-0.67668082	0.05693311	1	2	115917066	115921750	+	917	-	-	-	-	S;U	0VHIT;KOG3377;0A6R0;13VS6;1D32E;0DTQI;1B5YX;0UV2U	-	100359199	-
ENSOCUG00000015891	844.5618712	676.4162187	1012.707524	1.497166235	0.582234418	0.05695911	1	5	2939084	3000767	-	2364	RHPN2	GO:0005515;GO:0007165;GO:0005515;	-	-	Z;S;T;L	0UKFY;0DEET;1AXTA;12R0X;09T3Q;1CP4H;0V42G;KOG2220	rhophilin Rho GTPase binding protein 2 [Source:HGNC Symbol;Acc:HGNC:19974]	100357570	-
ENSOCUG00000015755	168.9557538	207.2295487	130.6819589	0.630614503	-0.665169745	0.057138186	1	13	52938401	52952144	+	1654	DENND2D	GO:0005654;GO:0005829;GO:0017112;	K20161	-	T	0UISI;12TTD;09XY2;KOG3569;1CU38;1ATZG;0DJB2;0V8VV	DENN domain containing 2D [Source:HGNC Symbol;Acc:HGNC:26192]	100353109	-
ENSOCUG00000001138	1359.941423	1632.480009	1087.402836	0.666104841	-0.586178829	0.057268636	1	19	11519985	11531427	+	2067	-	GO:0003677;GO:0003677;GO:0003677;GO:0003700;GO:0003700;GO:0005515;GO:0005634;GO:0005634;GO:0005634;GO:0005737;GO:0006355;GO:0006355;GO:0006915;GO:0006915;GO:0006915;GO:0007049;GO:0044212;GO:0044212;GO:0046872;GO:0051262;GO:0051262;GO:0003677;GO:0003700;GO:0005634;GO:0006355;GO:0006915;GO:0044212;GO:0051262;	K04451	-	K	1AVUU;0UKCC;0VDT8;0DI05;0IITK;09X7G;1CSQW;13B4X	Oryctolagus cuniculus tumor protein p53 (TP53), mRNA. [Source:RefSeq mRNA;Acc:NM_001082404]	100009292	Q95330
ENSOCUG00000009086	87.29126043	32.45941927	142.1231016	4.378485654	2.130431985	0.057281262	1	2	28738478	28782783	+	5175	KLB	GO:0004553;GO:0004553;GO:0005104;GO:0005975;GO:0005975;GO:0008284;GO:0008543;GO:0016020;GO:0016021;GO:0017134;GO:0090080;	K22404	-	G	KOG0626;09XD8;1AXG0;0DIQQ;0V8BC;1CQN6;0UMAC;12QGI	klotho beta [Source:HGNC Symbol;Acc:HGNC:15527]	100354505	-
ENSOCUG00000026192	60.1624664	41.69522168	78.62971111	1.885820676	0.915192495	0.057318649	1	GL018824	826790	828057	+	336	RHOF	GO:0000166;GO:0003924;GO:0003924;GO:0005525;GO:0005525;GO:0005525;GO:0007015;GO:0007264;GO:0007264;	K07872	-	Z;S	1AUBX;0UIV1;0V6MA;1CRKY;09VN8;KOG0393;13HSY;0DGWQ	ras homolog family member F, filopodia associated [Source:HGNC Symbol;Acc:HGNC:15703]	103345634	-
ENSOCUG00000013818	152.4759257	198.7191864	106.2326651	0.534586856	-0.903503729	0.057558887	1	9	67425158	67425409	-	252	-	GO:0004129;GO:0004129;GO:0005746;GO:0005746;GO:0009055;GO:0009055;GO:0016020;GO:0016021;GO:0022900;GO:1902600;	-	-	C	0IZJ9;0UW30;0VKHA;1B6KC;1D50H;0DVQ1;0A8T5;13TBG	-	-	-
ENSOCUG00000003893	12.60006036	6.10291852	19.09720221	3.129191738	1.645790061	0.057562541	1	GL019513	40116	42224	-	1944	-	-	-	-	S	0V5MM;09UN1;13MCK;1AZW8;0UHFS;0IEN5;1CQMB;0DFXU	-	-	-
ENSOCUG00000002344	1479.194205	1140.056518	1818.331892	1.594948902	0.673510205	0.05762895	1	9	17724625	17732989	+	2547	SEMA3B	GO:0005515;GO:0030215;GO:0030215;	K06840	-	T	09YQF;0DFQ0;1CQDK;0V9N8;12RKU;1ASSR;0UH3Z;KOG3611	semaphorin 3B [Source:HGNC Symbol;Acc:HGNC:10724]	100339559	G1SHC6
ENSOCUG00000000598	1405.336141	1678.69736	1131.974923	0.67431745	-0.568500163	0.057914162	1	12	101894856	101925695	-	2025	HDAC2	GO:0004407;GO:0016575;GO:0000122;GO:0001103;GO:0004407;GO:0004407;GO:0005634;GO:0005654;GO:0005737;GO:0006344;GO:0008134;GO:0008284;GO:0010870;GO:0016575;GO:0016575;GO:0016580;GO:0016581;GO:0019899;GO:0032991;GO:0033558;GO:0035098;GO:0042826;GO:0043433;GO:0043565;GO:0045862;GO:0045892;GO:0045944;GO:0051059;GO:0004407;GO:0016575;GO:0004407;GO:0004407;GO:0004407;GO:0005634;GO:0006325;GO:0016575;GO:…	-	-	-	-	histone deacetylase 2 [Source:HGNC Symbol;Acc:HGNC:4853]	-	-
ENSOCUG00000029466	323.4460378	199.9406997	446.9513758	2.235419685	1.160545713	0.058109757	1	GL018704	3314846	3318818	+	2539	TMEM35B	GO:0016020;GO:0016021;	-	-	-	-	transmembrane protein 35B [Source:HGNC Symbol;Acc:HGNC:40021]	100358912	U3KP25
ENSOCUG00000000815	21.05333536	12.51880894	29.58786178	2.363472589	1.240908133	0.05816289	1	2	132364112	132370422	+	2159	GPR75	GO:0004930;GO:0004930;GO:0004930;GO:0007186;GO:0007186;GO:0007186;GO:0016020;GO:0016021;GO:0016021;GO:0016021;GO:0016493;GO:0070098;GO:1901214;	K08417	-	T	1AWY8;0VDFA;0UMG0;1CTJJ;0DIU7;0A2JE;0IJVJ;13M1N	G protein-coupled receptor 75 [Source:HGNC Symbol;Acc:HGNC:4526]	100347723	G1SE47
ENSOCUG00000003227	127.5057946	89.18711597	165.8244733	1.859287314	0.894749726	0.058211535	1	GL019677	21	18275	+	2600	-	GO:0005886;GO:0005886;GO:0016020;GO:0016021;GO:0034605;GO:0034605;GO:0035774;GO:0035774;GO:1902476;GO:1902476;	-	-	U	KOG2514	-	-	-
ENSOCUG00000027509	30.22860069	42.09207147	18.3651299	0.436308532	-1.19657941	0.05839433	1	9	4412363	4413433	+	1071	CX3CR1	GO:0004896;GO:0004930;GO:0004930;GO:0004930;GO:0004930;GO:0005886;GO:0006935;GO:0006935;GO:0006935;GO:0007155;GO:0007155;GO:0007155;GO:0007165;GO:0007186;GO:0007186;GO:0007186;GO:0007200;GO:0009986;GO:0009986;GO:0016020;GO:0016021;GO:0016021;GO:0016021;GO:0016495;GO:0016495;GO:0016525;GO:0019221;GO:0019960;GO:0019960;GO:0019960;GO:0021626;GO:0035176;GO:0042534;GO:0045428;GO:0050769;GO:0050804;GO:…	-	-	T	0DJVD;0IGZ8;09YF3;0V858;0UNQ3;1CUNN;13IK9;1AY6T	Oryctolagus cuniculus C-X3-C motif chemokine receptor 1 (CX3CR1), mRNA. [Source:RefSeq mRNA;Acc:NM_001082134]	-	-
ENSOCUG00000015068	55.26286154	37.90851182	72.61721125	1.915591189	0.937789705	0.05843136	1	GL018793	490385	516724	+	3844	KIF23	GO:0000281;GO:0000915;GO:0003777;GO:0005524;GO:0005634;GO:0005654;GO:0005813;GO:0005819;GO:0007018;GO:0008017;GO:0008017;GO:0030496;GO:0032467;GO:0045171;GO:0051256;GO:0072383;GO:0072686;GO:0090543;GO:0097149;GO:0000915;GO:0003777;GO:0005524;GO:0007018;GO:0008017;GO:0072383;GO:0000915;GO:0003777;GO:0005524;GO:0007018;GO:0008017;GO:0072383;GO:0000915;GO:0003777;GO:0005524;GO:0007018;GO:0008017;GO:…	-	-	Z	1CWHV;09UC2;0UNUJ;1AWD6;KOG0247;12S15;0DMNB;0V5B6	kinesin family member 23 [Source:HGNC Symbol;Acc:HGNC:6392]	100343765	G1T8N9
ENSOCUG00000003781	639.1251992	774.2871548	503.9632436	0.650873827	-0.619550193	0.058498146	1	9	76339930	76501880	+	2164	MAPRE2	GO:0005515;GO:0008017;GO:0005515;GO:0005874;GO:0005925;GO:0005925;GO:0008017;GO:0008017;GO:0008017;GO:0015630;GO:0019901;GO:0032014;GO:0035371;GO:0042802;GO:0043547;GO:0051549;GO:1903393;GO:0005515;GO:0008017;	K10436	-	Z	12QG6;1CTF1;0UFS1;KOG3000;1AZ5U;0DIPZ;09XCH;0V74H	microtubule associated protein RP/EB family member 2 [Source:HGNC Symbol;Acc:HGNC:6891]	100350491	-
ENSOCUG00000005217	4410.388016	5250.652131	3570.1239	0.679939141	-0.556522473	0.058507253	1	13	120338497	120342751	-	843	TSPAN1	GO:0005654;GO:0005737;GO:0005886;GO:0016020;GO:0016020;GO:0016021;GO:0016021;GO:0016021;GO:0030054;GO:0031982;GO:0043231;GO:0048471;GO:0050821;	K17348	-	S;G	0V8AT;1CTF8;0UM9U;KOG3882;13PXF;1AXGA;0DIQ6;09XCR	tetraspanin 1 [Source:HGNC Symbol;Acc:HGNC:20657]	100344998	G1SNF8
ENSOCUG00000022333	368.5215413	457.9850763	279.0580064	0.609316811	-0.714735549	0.058636905	1	1	16878357	16879292	+	936	-	-	-	-	-	-	-	-	-
ENSOCUG00000026280	699.8081397	559.771517	839.8447623	1.500334935	0.585284604	0.058642536	1	GL018881	514400	525082	+	2910	PVR	GO:0016020;GO:0016021;	K06539	-	-	-	PVR cell adhesion molecule [Source:HGNC Symbol;Acc:HGNC:9705]	100328928	Q8HY14
ENSOCUG00000026770	69.13875425	89.11822345	49.15928505	0.551618773	-0.858256539	0.058780198	1	1	174934220	174935754	+	1416	FJX1	GO:0005615;GO:0010842;	-	-	-	-	four-jointed box kinase 1 [Source:HGNC Symbol;Acc:HGNC:17166]	-	-
ENSOCUG00000021526	1841.094436	2204.908469	1477.280402	0.669996248	-0.577775077	0.058793738	1	GL018752	1121013	1132918	-	1816	FUS	GO:0003676;GO:0003676;GO:0003682;GO:0003713;GO:0003723;GO:0003723;GO:0003723;GO:0003723;GO:0003723;GO:0003730;GO:0005634;GO:0005634;GO:0005654;GO:0005737;GO:0006355;GO:0006355;GO:0006355;GO:0006357;GO:0008380;GO:0008380;GO:0010467;GO:0042802;GO:0043484;GO:0046872;GO:0048255;GO:0051260;GO:1903508;GO:1905168;	-	-	Z;S	0WG9T;13C5Z;KOG1995	FUS RNA binding protein [Source:HGNC Symbol;Acc:HGNC:4010]	-	-
ENSOCUG00000023825	50.67136096	29.88423423	71.4584877	2.391176804	1.257720807	0.058891799	1	15	60161947	60286875	+	2017	SNCA	GO:0005737;GO:0014059;GO:0005737;GO:0014059;GO:0005737;GO:0014059;GO:0001774;GO:0001956;GO:0001963;GO:0005634;GO:0005737;GO:0005737;GO:0005829;GO:0005856;GO:0005886;GO:0006631;GO:0006638;GO:0006644;GO:0007006;GO:0007268;GO:0008344;GO:0014048;GO:0014059;GO:0014059;GO:0016234;GO:0030672;GO:0033138;GO:0034599;GO:0035493;GO:0040012;GO:0042393;GO:0042416;GO:0042417;GO:0042493;GO:0042775;GO:0042802;GO:…	K04528	-	T	1D342;1B5K1;0DTS0;0A6SH;13Q47;0VHKB;0UV4M;0IWI2	synuclein alpha [Source:HGNC Symbol;Acc:HGNC:11138]	100359228	G1U0V2
ENSOCUG00000006321	4058.784798	4851.898372	3265.671223	0.673070821	-0.57116978	0.059131638	1	13	69464733	69681390	+	2587	-	GO:0003779;GO:0005515;GO:0006488;GO:0031032;GO:0003779;GO:0005515;GO:0006488;GO:0031032;GO:0006488;GO:0006488;GO:0016020;GO:0016021;GO:0003779;GO:0003779;GO:0003779;GO:0005515;GO:0005516;GO:0031032;GO:0031032;	-	-	Z;F;S;O	1D0CC;0UFUQ;13MK2;0A3KB;KOG3339;0VEFH;0DR71;1B056;1ASK8;1CYR7;KOG2046;0VDP2;0URP5;0A2XZ;0DPS0;13HAN	-	100358440	-
ENSOCUG00000026333	2007.406895	1417.059713	2597.754077	1.833200149	0.874364308	0.059262471	1	19	11100588	11109342	+	3836	PER1	GO:0000122;GO:0000976;GO:0000978;GO:0002028;GO:0005515;GO:0005634;GO:0005654;GO:0005737;GO:0005829;GO:0007623;GO:0007623;GO:0008134;GO:0009416;GO:0010608;GO:0019900;GO:0019900;GO:0031490;GO:0031625;GO:0032922;GO:0032922;GO:0042634;GO:0042752;GO:0043153;GO:0043966;GO:0043966;GO:0043967;GO:0045892;GO:0045944;GO:0051591;GO:0070888;GO:0070932;GO:0097167;GO:2000323;	K21944	-	T	0WC8K;1DCAI;0V0TI;0AZSA;14SWM;0E5AI;KOG3753	period circadian regulator 1 [Source:HGNC Symbol;Acc:HGNC:8845]	100342071	-
ENSOCUG00000015787	13.32561059	6.657465085	19.99375609	3.003208554	1.586504665	0.059400941	1	4	18640984	18675516	+	2753	BFSP1	GO:0005212;GO:0005212;GO:0005882;GO:0005212;GO:0005212;	K10378	-	Z	1CPRR;12QIN;0UN1M;0DF1Y;0V4QX;09TRK;0IHW9;1B1AG	beaded filament structural protein 1 [Source:HGNC Symbol;Acc:HGNC:1040]	100347138	-
ENSOCUG00000029530	99.00452559	125.0282441	72.98080704	0.583714564	-0.77666503	0.059586103	1	11	85375777	85395080	+	1095	CENPH	GO:0000776;GO:0000776;GO:0005634;GO:0005654;GO:0005730;GO:0043515;GO:0051382;GO:0000776;GO:0000776;GO:0051382;GO:0051382;GO:0000776;GO:0051382;	K11500	-	-	-	centromere protein H [Source:HGNC Symbol;Acc:HGNC:17268]	103349644	-
ENSOCUG00000008455	2509.641464	2001.58917	3017.693759	1.507648924	0.592300517	0.059593487	1	13	36832900	36839479	+	1055	SSR2	GO:0001701;GO:0005783;GO:0005783;GO:0016020;GO:0016021;GO:0016021;GO:0016021;	K13250	-	U	0VDR4;1B4D0;0DQHR;09ZHR;1CZJX;13IXH;0UTXW;KOG3317	signal sequence receptor subunit 2 [Source:HGNC Symbol;Acc:HGNC:11324]	100342387	-
ENSOCUG00000016136	1539.195082	1830.394952	1247.995213	0.681817447	-0.552542578	0.059684973	1	17	7299188	7318475	+	2910	-	-	K19367	-	S	0DIB7;1B181;0UU1T;0V7YW;12Q8A;1CT1P;09X0R;0IETY	-	100358285	-
ENSOCUG00000028137	27.72039893	40.3046956	15.13610226	0.375541907	-1.412954185	0.059916695	1	7	160292260	160298430	-	2164	IHH	GO:0001501;GO:0001501;GO:0001503;GO:0001569;GO:0001649;GO:0001701;GO:0001708;GO:0001763;GO:0001944;GO:0001947;GO:0002053;GO:0003382;GO:0003406;GO:0003413;GO:0005113;GO:0005113;GO:0005509;GO:0005615;GO:0005886;GO:0005886;GO:0006029;GO:0006508;GO:0006508;GO:0006508;GO:0007224;GO:0007224;GO:0007267;GO:0007267;GO:0007275;GO:0007275;GO:0007275;GO:0007389;GO:0008233;GO:0008233;GO:0008233;GO:0008284;GO:…	K11989	-	T	0VAB1;09ZE1;0DKWD;12SFV;KOG3638;1CVRK;1B1AA;0UJAE	Indian hedgehog signaling molecule [Source:HGNC Symbol;Acc:HGNC:5956]	100008942	G1U6S4
ENSOCUG00000005745	12.01979744	5.683514511	18.35608037	3.229705904	1.691402799	0.059941992	1	GL018789	884179	896741	+	3376	-	GO:0004497;GO:0005506;GO:0005506;GO:0005783;GO:0005789;GO:0007608;GO:0016020;GO:0016491;GO:0016705;GO:0016705;GO:0016712;GO:0016712;GO:0020037;GO:0020037;GO:0031090;GO:0043231;GO:0046872;GO:0050896;GO:0055114;GO:0055114;GO:0055114;GO:0070330;	-	-	Q	1B3KS;0UM4P;1CRXQ;12SZU;0DGDQ;KOG0156;09TUB;0V59K	Cytochrome P450 2G1 [Source:UniProtKB/Swiss- Prot;Acc:P24461]	100359338	P24461
ENSOCUG00000033473	4.539702346	0.973950574	8.105454119	8.322243796	3.056972552	0.060111699	1	7	165364497	165367091	-	2595	-	-	-	-	-	-	-	-	-
ENSOCUG00000004783	42.39002505	56.93508463	27.84496547	0.489065146	-1.031901443	0.060271429	1	13	134983343	135033692	+	1332	-	GO:0016020;GO:0016021;	-	-	U	KOG4556;13QJS;0VBF1;1CX2G;0DN5Y;1AYU0;0A0IU;0UP8N	-	-	-
ENSOCUG00000013785	229.6516578	178.2113247	281.0919909	1.577295895	0.65745333	0.060385069	1	2	140034794	140532638	-	3078	PRKCE	GO:0000166;GO:0002281;GO:0003785;GO:0004672;GO:0004672;GO:0004674;GO:0004674;GO:0004674;GO:0004674;GO:0004697;GO:0004697;GO:0004697;GO:0004697;GO:0004699;GO:0004699;GO:0005524;GO:0005524;GO:0005524;GO:0005634;GO:0005634;GO:0005737;GO:0005737;GO:0005737;GO:0005739;GO:0005783;GO:0005794;GO:0005829;GO:0005829;GO:0005856;GO:0005886;GO:0005886;GO:0006468;GO:0006468;GO:0006468;GO:0006468;GO:0007049;GO:…	K18050	EC:2.7.11.13	T	KOG0694;0UK09;09V0U;0DHVB;1CSNV;1AVGR;12NBF;0V6DY	protein kinase C epsilon [Source:HGNC Symbol;Acc:HGNC:9401]	100009103	P10830
ENSOCUG00000021158	91.8492861	68.82287508	114.8756971	1.66914993	0.739113549	0.060495911	1	GL018816	759971	764289	-	1733	DUSP9	GO:0006470;GO:0008138;GO:0016311;GO:0016791;GO:0017017;GO:0000188;GO:0004721;GO:0004725;GO:0005737;GO:0006470;GO:0006470;GO:0008138;GO:0008138;GO:0016311;GO:0016311;GO:0016787;GO:0016791;GO:0016791;GO:0017017;GO:0017017;GO:0017017;GO:0035335;	K18498	-	V	12NUM;1CZMQ;09UCM;0V5BV;1AX92;KOG1717;0UP0I;0DQJ8	dual specificity phosphatase 9 [Source:HGNC Symbol;Acc:HGNC:3076]	100352814	G1TZC4
ENSOCUG00000025601	15.16848566	7.921419202	22.41555211	2.829739411	1.500669202	0.06051503	1	GL019319	8	4797	+	1173	RGS11	GO:0007186;GO:0007186;GO:0031681;GO:0032991;	K16449	-	T	0UKJI;09WW3;0DI6C;1CSWR;0V7U5;12RNH;KOG3589;1AXCI	regulator of G protein signaling 11 [Source:HGNC Symbol;Acc:HGNC:9993]	100341920	-
ENSOCUG00000014625	894.6315586	716.6576281	1072.605489	1.496677698	0.581763578	0.06071448	1	14	94028591	94091377	+	5062	HEG1	GO:0001570;GO:0001701;GO:0001885;GO:0001886;GO:0001944;GO:0001945;GO:0003017;GO:0003209;GO:0003222;GO:0003281;GO:0005509;GO:0005509;GO:0005911;GO:0005911;GO:0007043;GO:0007043;GO:0007507;GO:0007507;GO:0007507;GO:0009791;GO:0009897;GO:0009986;GO:0016020;GO:0016021;GO:0030324;GO:0035024;GO:0035264;GO:0045216;GO:0048845;GO:0050878;GO:0055017;GO:0060039;GO:0090271;GO:1902414;GO:1905709;GO:2000299;	-	-	T	09VDQ;1AT9A;0UHNM;13K4J;1CRC3;0V6CP;0IJZT;0DGN8	heart development protein with EGF like domains 1 [Source:HGNC Symbol;Acc:HGNC:29227]	100353037	-
ENSOCUG00000017619	2407.972085	1663.763281	3152.180889	1.894609002	0.921900144	0.06073949	1	8	97543647	97627144	+	3056	DNAJC3	GO:0004860;GO:0005515;GO:0005737;GO:0005783;GO:0005788;GO:0005829;GO:0006469;GO:0019901;GO:0034976;GO:0036494;GO:0043066;GO:0051087;GO:0051603;GO:0051787;GO:0070417;GO:1903912;GO:1903912;	K09523	-	O	1CXPS;0UFHW;0VC0Q;1ARE5;KOG0624;0A14E;0DNSG;12S2K	DnaJ heat shock protein family (Hsp40) member C3 [Source:HGNC Symbol;Acc:HGNC:9439]	100355543	G1TE27
ENSOCUG00000015473	125.2256656	156.2206275	94.23070375	0.603189894	-0.729315838	0.060772619	1	2	38786672	39234971	+	3138	XKR6	GO:0016020;GO:0016021;GO:0016021;GO:0016021;GO:0016020;GO:0016021;GO:0016021;GO:0016021;GO:0003676;GO:0016021;GO:0003676;GO:0003676;	-	-	A;S;K	0UPKE;1AY8T;0DGI2;KOG4790;1CXN0;12RMB;0V68X;09V9P;1CRWX;0V6WN;141K2;09VY6;KOG0527;KOG2809;1AYY8;0UTG7;0DH6T	XK related 6 [Source:HGNC Symbol;Acc:HGNC:27806]	-	-
ENSOCUG00000004928	20794.68388	30017.94377	11571.42399	0.385483565	-1.375258742	0.060801975	1	3	18446613	18553561	+	3175	TGFBI	GO:0001525;GO:0005178;GO:0005515;GO:0005518;GO:0005518;GO:0005615;GO:0005615;GO:0005802;GO:0007155;GO:0007155;GO:0008283;GO:0030198;GO:0031012;GO:0050840;GO:0050840;GO:0005178;GO:0005178;GO:0005515;GO:0005518;GO:0005518;GO:0007155;GO:0007155;GO:0008283;GO:0008283;GO:0050840;GO:0050840;GO:0005178;GO:0005515;GO:0005518;GO:0007155;GO:0008283;GO:0050840;GO:0005178;GO:0005515;GO:0005518;GO:0007155;GO:…	K19519	-	W;M	0UGFZ;0V4XK;1AVY8;0DF8R;KOG1437;1CPYC;13I26;09TYN	transforming growth factor beta induced [Source:HGNC Symbol;Acc:HGNC:11771]	100009230	G1TKC9
ENSOCUG00000025111	232.7987551	305.0890314	160.5084787	0.526103734	-0.926580805	0.0608668	1	14	2204281	2231628	+	1857	GALNT15	GO:0000139;GO:0005794;GO:0006486;GO:0016020;GO:0016021;GO:0016740;GO:0016757;GO:0030133;GO:0030246;	K00710	EC:2.4.1.41	O	0DJDU;13CTW;1CU66;KOG3736;0V8Y9;0UPZ1;1AZDG;09Y0Q	polypeptide N-acetylgalactosaminyltransferase 15 [Source:HGNC Symbol;Acc:HGNC:21531]	100343323	-
ENSOCUG00000000259	451.375899	324.7857253	577.9660727	1.779530403	0.831496582	0.060963184	1	9	39233683	39246913	-	357	-	GO:0003723;GO:0003723;GO:0003723;GO:0003743;GO:0003743;GO:0003743;GO:0006412;GO:0006413;GO:0006413;GO:0006413;	-	-	J	1AZ59;13ETM;1CVF6;0UPA1;09Z51;0IHHQ;0DKKR;0VA26	-	-	-
ENSOCUG00000005218	1148.986781	926.2712273	1371.702336	1.480886262	0.56646084	0.061156193	1	2	67917049	68071376	+	4602	MTUS1	GO:0005730;GO:0015630;	-	-	Z	0DNW0;0A03T;0IEXM;1CXTG;12SKH;0VC3Y;0US8J;1B2AA	microtubule associated scaffold protein 1 [Source:HGNC Symbol;Acc:HGNC:29789]	100346261	-
ENSOCUG00000032755	244.3307774	302.5537825	186.1077724	0.615122941	-0.701053314	0.061415084	1	13	35787401	35803545	-	1197	-	-	-	-	-	-	-	-	-
ENSOCUG00000003829	27774.78467	22429.57816	33119.99117	1.476621224	0.5622998	0.061512481	1	12	148763227	148831697	-	2852	EZR	GO:0005856;GO:0008092;GO:0003779;GO:0003779;GO:0005856;GO:0005856;GO:0008092;GO:0008092;GO:0000122;GO:0001650;GO:0001726;GO:0001772;GO:0001931;GO:0001951;GO:0003376;GO:0003779;GO:0005737;GO:0005768;GO:0005829;GO:0005856;GO:0005884;GO:0005886;GO:0005886;GO:0005902;GO:0005902;GO:0005903;GO:0005925;GO:0007159;GO:0008017;GO:0008022;GO:0008092;GO:0008360;GO:0010628;GO:0010737;GO:0015629;GO:0016324;GO:…	K08007	-	Z;S;T	0DIN7;KOG3529;1AWPD;0UIIU;0V7TS;1CTD4;12RFB;09W3R	ezrin [Source:HGNC Symbol;Acc:HGNC:12691]	100008846	Q8HZQ5
ENSOCUG00000025531	63.5639188	45.12135904	82.00647855	1.817464728	0.861927366	0.061528862	1	GL018827	478143	478763	+	621	-	GO:0000166;GO:0003924;GO:0003924;GO:0005525;GO:0005525;GO:0005525;GO:0005886;GO:0005886;GO:0007165;GO:0007165;GO:0007265;GO:0007265;GO:0016020;GO:0016020;	-	-	S;J	0V4MC;12UAZ;09TNB;KOG0395	-	-	-
ENSOCUG00000005885	497.6277529	398.2180546	597.0374512	1.499272683	0.5842628	0.061592572	1	14	45207520	45381546	-	9705	IGSF10	GO:0004930;GO:0004930;GO:0004930;GO:0007165;GO:0007186;GO:0007186;GO:0007186;GO:0016020;GO:0016021;GO:0016021;GO:0016021;GO:0035589;GO:0045028;GO:0045028;GO:0005515;GO:0005515;GO:0005576;GO:2001222;	-	-	T	09XNF;0V8K5;1CTRP;12Q6G;1B106;0UGZQ;0IE7G;0DJ08;KOG0619;0DEUS;13IDF;0UKTN;0V4GZ;1CPIH;09TI1;1B1NX	immunoglobulin superfamily member 10 [Source:HGNC Symbol;Acc:HGNC:26384]	100345517	G1SPW0
ENSOCUG00000002242	58.86612782	76.84290628	40.88934935	0.532116123	-0.910186978	0.06195805	1	GL018897	151400	174772	-	1659	CEP72	GO:0005515;GO:0005813;GO:0005813;GO:0005813;GO:0007051;GO:0007099;GO:0033566;GO:0034451;GO:0034451;GO:0042802;GO:1904779;GO:1904779;GO:1904779;	K16532	-	Z;S	0VFRK;13NGD;1B27A;0IH75;1D1MC;0A4WV;0UT4I;0DSBY	centrosomal protein 72 [Source:HGNC Symbol;Acc:HGNC:25547]	100355998	-
ENSOCUG00000017026	125.5272047	96.0790861	154.9753234	1.612997476	0.689744181	0.061998677	1	1	61452917	61502550	-	2562	-	-	K10524	-	F	0V3AE;13DR7;0IR10;1DFGS;1BB44;0E8IQ;0B4VX;0WHEU	-	100346334	G1TCV3
ENSOCUG00000015377	13997.99491	11163.3771	16832.61272	1.507842346	0.592485594	0.062112896	1	GL018713	617878	676188	+	2491	ANGPT2	GO:0001525;GO:0005615;GO:0010812;GO:0016525;GO:0030971;GO:0030971;GO:0030971;GO:0043537;GO:0048014;GO:0048514;GO:0050928;GO:0030971;	K05466	-	S;T;E;V	1AS0K;09TS9;13CXA;1CPSF;0DF2N;KOG2579;0UG7I;0V4RJ	angiopoietin 2 [Source:HGNC Symbol;Acc:HGNC:485]	100353377	G1T9B3
ENSOCUG00000016840	7.056353024	11.79833136	2.314374689	0.196161187	-2.349888477	0.062139244	1	17	22217370	22238781	+	2337	HDC	GO:0001694;GO:0001694;GO:0003824;GO:0003824;GO:0004398;GO:0004398;GO:0006520;GO:0006520;GO:0006548;GO:0006548;GO:0016831;GO:0016831;GO:0019752;GO:0019752;GO:0030170;GO:0030170;GO:0003824;GO:0006520;GO:0016831;GO:0019752;GO:0030170;	K01590	EC:4.1.1.22	-	-	histidine decarboxylase [Source:HGNC Symbol;Acc:HGNC:4855]	100352602	G1TCH4
ENSOCUG00000010054	1902.947062	1526.820658	2279.073466	1.492692317	0.577916819	0.062190807	1	5	13156941	13168256	+	1869	HERPUD1	GO:0005515;GO:0005515;GO:0005515;GO:0005515;	-	-	O	12SIW;0V5IS;09UJK;0URVF;0DI3Y;1AXJH;1CX23;KOG4583	homocysteine inducible ER protein with ubiquitin like domain 1 [Source:HGNC Symbol;Acc:HGNC:13744]	-	-
ENSOCUG00000001374	35.73786145	48.68696316	22.78875974	0.468066978	-1.095213107	0.062251514	1	20	24178832	24359685	-	2978	TSHR	GO:0004996;GO:0007186;GO:0016021;GO:0004930;GO:0004930;GO:0004930;GO:0004996;GO:0004996;GO:0004996;GO:0005886;GO:0005886;GO:0007165;GO:0007186;GO:0007186;GO:0007186;GO:0007189;GO:0008344;GO:0016020;GO:0016021;GO:0016021;GO:0016021;GO:0016500;GO:0016500;GO:0030183;GO:0038194;GO:0040012;GO:0040018;GO:0060119;GO:0060122;GO:0071542;GO:0090103;GO:0120162;	K04249	-	T	0UJ1D;1CTEZ;12R95;09VSP;0V6RN;KOG2087;0DH14;1AS5H	thyroid stimulating hormone receptor [Source:HGNC Symbol;Acc:HGNC:12373]	100353965	G1SFA5
ENSOCUG00000003205	15.30974433	29.04359417	1.575894492	0.054259624	-4.203977146	0.062254241	1	12	106212638	106370024	-	8019	ROS1	GO:0001558;GO:0002066;GO:0004672;GO:0004713;GO:0004713;GO:0004714;GO:0005515;GO:0005524;GO:0006468;GO:0006468;GO:0007169;GO:0007283;GO:0009986;GO:0010629;GO:0010966;GO:0016020;GO:0019903;GO:0023014;GO:0030154;GO:0032006;GO:0038083;GO:0048471;GO:0070372;GO:0004672;GO:0004713;GO:0004714;GO:0005515;GO:0005524;GO:0006468;GO:0007169;GO:0016020;GO:0004672;GO:0004713;GO:0004714;GO:0005515;GO:0005524;GO:…	-	-	T	0V445;KOG1095;0DHET;1AX93;1CS4V;0UJJR;09T5F;12RFY	ROS proto-oncogene 1, receptor tyrosine kinase [Source:HGNC Symbol;Acc:HGNC:10261]	-	-
ENSOCUG00000012026	1435.679862	1149.836922	1721.522802	1.49718866	0.582256027	0.062256421	1	GL018700	13211083	13237968	-	3550	-	GO:0003824;GO:0004423;GO:0005764;GO:0008484;GO:0008484;GO:0003824;GO:0004423;GO:0008484;GO:0003824;GO:0003824;GO:0004423;GO:0004423;GO:0008484;GO:0008484;GO:0003824;GO:0008484;GO:0003824;GO:0008484;	K01136	EC:3.1.6.13	G	0DNWQ;1AYAS;0UI2A;1CXU3;0VC4P;0A18U;KOG3867;12N15	-	100356659	G1T2G7
ENSOCUG00000026724	199.8131394	244.9698761	154.6564028	0.631328249	-0.663537789	0.062322439	1	AAGW02082565	2697	3897	-	879	-	GO:0003676;GO:0003676;	-	-	S;F;K	0A27Q;0VD3M;1AV7G;0DPVW;12V0J;0IHZM;0UT0V;1CYVD	-	-	-
ENSOCUG00000003148	133.6183516	166.9648723	100.2718309	0.600556449	-0.735628236	0.062340428	1	18	47688421	47721992	+	822	CUTC	GO:0005507;GO:0005507;GO:0005507;GO:0005634;GO:0005654;GO:0005730;GO:0005737;GO:0005829;GO:0051262;GO:0055070;GO:0055070;	K06201	-	P	0DH2P;KOG4013;1CRSV;1B3HT;0UUA5;13I3D;09VUF;0V6T5	cutC copper transporter [Source:HGNC Symbol;Acc:HGNC:24271]	100342989	G1SJ46
ENSOCUG00000011204	997.0522366	1188.038896	806.0655776	0.678484165	-0.55961295	0.062418109	1	2	115970085	116008926	+	1263	TIA1	GO:0003676;GO:0003676;GO:0003723;GO:0005634;GO:0005654;GO:0005737;GO:0005737;GO:0005829;GO:0010494;GO:0010494;GO:0017148;GO:0035925;GO:0042036;GO:0048024;GO:0097165;GO:0097165;GO:1903608;GO:0003676;GO:0003676;GO:0003676;GO:0003676;	K13201	-	A;J	1AYAF;0V4AW;KOG0148;0DEP3;1CPCU;09TBQ;0UFNT;12SDP	TIA1 cytotoxic granule associated RNA binding protein [Source:HGNC Symbol;Acc:HGNC:11802]	100337795	-
ENSOCUG00000014056	625.5401843	495.2309672	755.8494015	1.526256336	0.609997284	0.06254507	1	2	44251522	44410462	-	5990	DOCK5	GO:0005085;GO:0005085;GO:0005085;GO:0005096;GO:0005096;GO:0005737;GO:0005829;GO:0005886;GO:0007264;GO:0007264;GO:0010634;GO:0016477;GO:0016477;GO:0043547;GO:1900026;GO:1904694;GO:1904754;GO:0005085;GO:0005085;GO:0005096;GO:0005096;GO:0007264;GO:0007264;GO:0016477;GO:0016477;GO:0043547;GO:0005085;GO:0005096;GO:0007264;GO:0016477;GO:0005085;GO:0005096;GO:0007264;GO:0016477;	K17707	-	T	0UG57;0DEJE;09T86;12N3M;1AREH;KOG1998;1CP99;0V476	dedicator of cytokinesis 5 [Source:HGNC Symbol;Acc:HGNC:23476]	100343877	-
ENSOCUG00000005743	33.66129168	66.99154087	0.331042498	0.004941557	-7.66081869	0.062572544	1	GL019228	3650	5792	-	774	KLNB1	GO:0004252;GO:0004252;GO:0006508;GO:0006508;GO:0006508;GO:0008233;GO:0008236;GO:0016787;	-	-	O	KOG3627	-	-	-
ENSOCUG00000015686	1317.775041	1587.962853	1047.587229	0.659705123	-0.600106787	0.06302794	1	GL018716	282523	328579	+	4644	TSPAN14	GO:0005886;GO:0009986;GO:0016020;GO:0016021;GO:0016021;GO:0016021;GO:0019899;GO:0019899;GO:0045747;GO:0051604;GO:0051604;GO:0072659;GO:0097197;GO:0016021;GO:0016021;GO:0016021;GO:0016021;	K17296	-	S;G	1B2SF;09TJW;0UFYW;1CPK5;KOG3882;0V4IW;0DEWM;12N96	tetraspanin 14 [Source:HGNC Symbol;Acc:HGNC:23303]	100355487	G1T9Z7
ENSOCUG00000006103	22.47471192	10.98065966	33.96876418	3.093508516	1.629244005	0.063067297	1	12	38737905	38750011	+	946	-	-	K11509	-	S	13RBX;0DKQQ;0VA5V;1CVJ7;0IXIS;1B15H;0UPQX;09WR5	-	103349773	-
ENSOCUG00000001716	22.40062232	33.3294299	11.47181474	0.344194748	-1.538703009	0.063356228	1	X	36349579	36418227	-	2740	PFKFB1	GO:0003824;GO:0003873;GO:0005524;GO:0006000;GO:0006003;GO:0003824;GO:0003824;GO:0003873;GO:0003873;GO:0005524;GO:0005524;GO:0006000;GO:0006000;GO:0006003;GO:0006003;GO:0046835;GO:0003824;GO:0003873;GO:0005524;GO:0006000;GO:0006003;GO:0003824;GO:0003873;GO:0004331;GO:0005524;GO:0006000;GO:0006003;GO:0006003;GO:0042802;GO:0043540;	K19028	-	G	1CQJ4;1B3SG;09UK4;0UMC8;0DFVS;12R0U;0V5JD;KOG0234	6-phosphofructo-2-kinase/fructose-2,6-biphosphatase 1 [Source:HGNC Symbol;Acc:HGNC:8872]	100345023	G1SFZ6
ENSOCUG00000006556	309.1104479	244.0401931	374.1807028	1.533274901	0.616616381	0.063411465	1	12	58034193	58046831	+	1477	OGFRL1	GO:0004985;GO:0016020;GO:0038023;GO:0004985;GO:0004985;GO:0016020;GO:0016020;GO:0038003;GO:0038023;GO:0038023;	-	-	-	-	opioid growth factor receptor like 1 [Source:HGNC Symbol;Acc:HGNC:21378]	100344070	-
ENSOCUG00000010011	4325.377554	3508.319307	5142.435802	1.465783286	0.551671819	0.063503054	1	13	36727329	36764671	-	2489	LMNA	GO:0005634;GO:0005634;GO:0005635;GO:0005635;GO:0005638;GO:0005654;GO:0005829;GO:0005882;GO:0006606;GO:0006997;GO:0006998;GO:0008285;GO:0010628;GO:0016604;GO:0030334;GO:0030951;GO:0031647;GO:0031965;GO:0034504;GO:0055015;GO:0071456;GO:0072201;GO:0090201;GO:0090343;GO:1900114;GO:1900180;GO:1903243;GO:2001237;GO:0005882;	K12641	-	Z;D;Y	1CRS3;0V6SA;0UHSX;12PTX;09VTI;0DH1W;KOG0977;1ARIZ	lamin A/C [Source:HGNC Symbol;Acc:HGNC:6636]	100343574	G1SYD6
ENSOCUG00000008109	20.95599176	10.64804713	31.26393638	2.936119271	1.553910575	0.063519455	1	3	84245298	84736365	+	1356	C8orf34	-	-	-	S;T	12QMQ;1B076;1CS5I;0DHFD;0UIGV;0IFD0;09W64;0V74D	chromosome 8 open reading frame 34 [Source:HGNC Symbol;Acc:HGNC:30905]	100346356	-
ENSOCUG00000012754	191.2818168	151.2334503	231.3301833	1.529623128	0.613176242	0.063776407	1	14	92879481	92948152	-	2961	RUBCN	GO:0005654;GO:0005769;GO:0005770;GO:0005829;GO:0010507;GO:0043231;GO:0043553;GO:0045806;GO:1901097;	K19330	-	T	KOG1829;0E9GS;13G08;1BBHY;0WJ25;1DGC0;KOG4381;0V3V1;0B6C6	rubicon autophagy regulator [Source:HGNC Symbol;Acc:HGNC:28991]	100351083	-
ENSOCUG00000012444	6.477263381	10.71362448	2.240902281	0.209163788	-2.257294991	0.063941328	1	14	97364822	97378354	-	2275	FBXO40	GO:0005515;GO:0005737;GO:0008270;GO:0008270;GO:0016567;GO:0042692;GO:0046872;GO:0061630;GO:0061630;	-	-	S	1AT0V;0UHDQ;1CYU6;0DPPJ;0VD27;0IEIY;13JVD;0A40S	F-box protein 40 [Source:HGNC Symbol;Acc:HGNC:29816]	-	-
ENSOCUG00000013478	3349.406541	4110.382541	2588.430541	0.62972984	-0.667195063	0.064020431	1	18	69314697	69341331	+	1068	HTRA1	GO:0001890;GO:0004252;GO:0004252;GO:0005515;GO:0005886;GO:0006508;GO:0006508;GO:0006508;GO:0008236;GO:0030512;GO:0030514;GO:0042802;GO:0060718;	K08784	EC:3.4.21.-	O;W	0V5GG;09W13;0DIM7;KOG1320;12PMR;0UNGF;1CUGN;1AWGT	HtrA serine peptidase 1 [Source:HGNC Symbol;Acc:HGNC:9476]	100008705	-
ENSOCUG00000010325	46.89959535	60.87308177	32.92610894	0.540897684	-0.886572375	0.064049478	1	8	79475576	79555914	+	1972	SLAIN1	-	K16580	-	S	12SX3;0UIRA;0IGU1;0DGUK;0V6J4;09VJZ;1AWDB;1CRIP	SLAIN motif family member 1 [Source:HGNC Symbol;Acc:HGNC:26387]	100350489	-
ENSOCUG00000002083	144.7245744	179.1212062	110.3279425	0.615940149	-0.699137923	0.064087815	1	6	8795220	8832831	+	2512	TMC7	GO:0005887;GO:0016021;GO:0005887;GO:0005887;GO:0016020;GO:0016021;GO:0016021;GO:0016021;	K21988	-	-	-	transmembrane channel like 7 [Source:HGNC Symbol;Acc:HGNC:23000]	100343967	-
ENSOCUG00000007470	278.4897709	139.8693276	417.1102141	2.982142127	1.576349017	0.064217093	1	1	102188213	102371526	-	4082	ZBTB16	GO:0000122;GO:0000978;GO:0001227;GO:0001501;GO:0001823;GO:0003676;GO:0003677;GO:0005515;GO:0005634;GO:0005634;GO:0006355;GO:0007417;GO:0008285;GO:0009880;GO:0009952;GO:0016604;GO:0016605;GO:0016607;GO:0017053;GO:0030097;GO:0032332;GO:0032991;GO:0035116;GO:0035136;GO:0035137;GO:0042802;GO:0042803;GO:0043065;GO:0045600;GO:0045638;GO:0045778;GO:0045892;GO:0045893;GO:0048133;GO:0051138;GO:0051216;GO:…	K10055	-	K	0V93W;0DJJW;09Y6C;12R0I;0UNBG;1CUCN;KOG1721;1B0DH	zinc finger and BTB domain containing 16 [Source:HGNC Symbol;Acc:HGNC:12930]	100340808	G1ST46
ENSOCUG00000015109	276.7973168	399.7965072	153.7981264	0.384691021	-1.37822794	0.064325226	1	GL019174	43447	90074	-	3768	-	GO:0016020;GO:0016021;GO:0016740;GO:0016746;GO:0016746;GO:0016746;GO:0016746;GO:0016746;GO:0016746;	K08765	EC:2.3.1.21	I	0V7IG;0DHV5;KOG3717;12NYF;09WJV	-	100350716	G1T8S6
ENSOCUG00000013123	4321.241272	5148.335073	3494.147471	0.67869465	-0.559165454	0.064434303	1	19	42476434	42555383	-	7446	-	GO:0005198;GO:0005198;GO:0005198;GO:0005198;GO:0005882;GO:0005198;GO:0005198;GO:0005882;GO:0005198;GO:0005198;GO:0005882;GO:0005198;GO:0005198;GO:0005882;	-	-	Z	09UC4;0DFMN;0IFTF;13IBZ;0UH0N;1B4C6;1CQBB;0V5B8;0DKRV;0A3WZ;1AZF3;13KRM;0VBAA;1CVKG;0IF9P;0UIA0;1B438;09UC4;0DFMN;0IFTF;13IBZ;0UNMY;1CQBB;0V5B8;09UC4;0DFMN;0IFTF;13IBZ;0UM1I;1CQBB;0V5B8;1AV4Y	-	-	-
ENSOCUG00000006482	502.7114672	653.7437502	351.6791842	0.537946533	-0.894465304	0.064479923	1	13	86728323	86741472	-	1583	IFI44	GO:0009617;	-	-	S	0V4Y2;0DF95;12T23;0UK1C;09TZ5;0IDX3;1CPYR;1AVXU	interferon induced protein 44 [Source:HGNC Symbol;Acc:HGNC:16938]	100344420	-
ENSOCUG00000011353	196.428061	152.8875084	239.9686136	1.569576325	0.650375186	0.064487263	1	7	160759947	160763674	+	2191	INHA	GO:0005102;GO:0005179;GO:0005576;GO:0007165;GO:0008083;GO:0008083;GO:0008083;GO:0034673;GO:0042127;GO:0042541;GO:0043512;GO:0051726;	K05500	-	T	1D0G4;13IZK;0DRAR;KOG3900;0UMVX;1AUMW;0A3Q1;0VEIW	inhibin subunit alpha [Source:HGNC Symbol;Acc:HGNC:6065]	100328899	B7NZH7
ENSOCUG00000029135	40.80399893	23.71191867	57.89607919	2.441644643	1.287853246	0.064543468	1	GL019284	73558	75757	+	1206	ZFP92	GO:0003676;GO:0003676;GO:0006355;GO:0006355;GO:0046872;	K09228	-	-	-	ZFP92 zinc finger protein [Source:HGNC Symbol;Acc:HGNC:12865]	100347381	-
ENSOCUG00000005277	839.9043611	676.431743	1003.376979	1.483338104	0.568847475	0.064607207	1	10	14822786	14870328	-	4473	NOD1	GO:0000166;GO:0002606;GO:0005515;GO:0005524;GO:0005737;GO:0006919;GO:0016045;GO:0016323;GO:0032755;GO:0032760;GO:0032874;GO:0035556;GO:0042228;GO:0042742;GO:0042802;GO:0042803;GO:0042981;GO:0042981;GO:0043123;GO:0043123;GO:0043280;GO:0044877;GO:0046330;GO:0050700;GO:0050830;GO:0051092;GO:0070374;GO:0071225;GO:1901224;GO:1904417;GO:0005515;GO:0042981;GO:0005515;GO:0042981;GO:0005515;GO:0042981;GO:…	K08727	-	T;I	09X63;0V84K;1CT7S;KOG4308;0DIH8;12UCX;0UHMA;1AT7Y	nucleotide binding oligomerization domain containing 1 [Source:HGNC Symbol;Acc:HGNC:16390]	100345423	G1SNK2
ENSOCUG00000012518	650.7487801	523.0684423	778.4291178	1.488197442	0.573565944	0.0646747	1	9	72326062	72366648	-	2751	DSC2	GO:0005509;GO:0005886;GO:0005886;GO:0005913;GO:0007155;GO:0007156;GO:0009267;GO:0014704;GO:0016020;GO:0030057;GO:0030057;GO:0031410;GO:0086042;GO:0086073;GO:0086091;GO:0098911;GO:0005509;GO:0005886;GO:0007155;GO:0007156;GO:0016020;GO:0005509;GO:0005509;GO:0005886;GO:0005886;GO:0007155;GO:0007155;GO:0007156;GO:0007156;GO:0016020;GO:0016020;GO:0016020;GO:0016021;	K07601	-	Z;U	1CSTH;0UKFS;12SPG;09WT4;1AWP0;KOG3594;0V7R8;0DI37	desmocollin 2 [Source:HGNC Symbol;Acc:HGNC:3036]	100344572	-
ENSOCUG00000000172	814.7548867	577.9934467	1051.516327	1.819253026	0.86334621	0.064973875	1	13	56144477	56548354	+	3979	VAV3	GO:0005085;GO:0005089;GO:0005515;GO:0035023;GO:0035556;GO:0001772;GO:0005085;GO:0005085;GO:0005089;GO:0005089;GO:0005154;GO:0005515;GO:0005737;GO:0005886;GO:0006906;GO:0006974;GO:0007229;GO:0007264;GO:0008361;GO:0016477;GO:0030031;GO:0030032;GO:0030593;GO:0030676;GO:0030890;GO:0035023;GO:0035556;GO:0042493;GO:0043087;GO:0043087;GO:0043552;GO:0045785;GO:0050853;GO:0005085;GO:0005085;GO:0005085;GO:…	K05730	-	T	KOG2996;0DI9B;1AW66;12QKG;09WMR;0V7KF;0UGXY;1CSZT	vav guanine nucleotide exchange factor 3 [Source:HGNC Symbol;Acc:HGNC:12659]	100341627	-
ENSOCUG00000030393	14.22722059	4.315206304	24.13923487	5.593993236	2.483878509	0.065014882	1	9	20212761	20213192	-	432	-	GO:0003735;GO:0005840;GO:0006412;	-	-	-	-	-	-	-
ENSOCUG00000022800	154.8334884	116.4458463	193.2211304	1.659321793	0.730593696	0.065052259	1	21	3221869	3230810	+	568	-	-	-	-	S	13VFB;0UVVU;1B6DN;0DUW3;0J1JI;0VJ5Y;0A8A5;1D471	-	100359164	-
ENSOCUG00000022131	270.9100916	328.8118321	213.0083511	0.647812306	-0.626352222	0.065104316	1	GL018765	148647	182982	+	1456	-	-	-	-	-	-	-	-	-
ENSOCUG00000007526	137.2475248	100.4968217	173.9982278	1.731380404	0.791922736	0.065128606	1	13	95622770	95650977	-	1506	CTH	GO:0003824;GO:0003824;GO:0004123;GO:0004123;GO:0018272;GO:0019343;GO:0019344;GO:0019346;GO:0019346;GO:0019346;GO:0030170;GO:0030170;GO:0030170;GO:0042802;GO:0043066;GO:0043123;GO:0044524;GO:0044524;GO:0044540;GO:0044540;GO:0051092;GO:0051289;GO:0070814;GO:1904831;GO:1990830;GO:2001234;GO:0003824;GO:0019346;GO:0030170;	K01758	EC:4.4.1.1	E	KOG0053;0V48D;09Y1B;0DJEC;0URP6;1AX55;1CU6T;12N47	cystathionine gamma-lyase [Source:HGNC Symbol;Acc:HGNC:2501]	100348407	G1ST90
ENSOCUG00000032262	151.6085056	185.7926403	117.4243708	0.632018419	-0.661961491	0.065232595	1	GL018820	708139	721879	+	2275	-	GO:0003723;GO:0003735;GO:0022625;	-	-	-	-	-	-	-
ENSOCUG00000028221	20.241568	11.29770979	29.18542621	2.583304648	1.36921779	0.065316928	1	2	159193483	159198631	-	414	CENPA	GO:0000132;GO:0000281;GO:0000775;GO:0000775;GO:0000778;GO:0000780;GO:0000780;GO:0000786;GO:0000786;GO:0000788;GO:0000939;GO:0003677;GO:0003677;GO:0003677;GO:0005623;GO:0005634;GO:0005634;GO:0005654;GO:0005694;GO:0031618;GO:0046982;GO:0046982;GO:0051382;GO:0071459;GO:0000786;GO:0003677;GO:0046982;	K11495	-	B	1D3TM;KOG1745;0VIQA;0A7J8;1B5VE;13SJ7;0UVD0;0DUDS	centromere protein A [Source:HGNC Symbol;Acc:HGNC:1851]	100353660	G1TYK4
ENSOCUG00000025459	5.316849293	9.142686526	1.49101206	0.163082487	-2.616326228	0.065341181	1	GL019349	62174	62806	+	633	-	GO:0003677;GO:0005634;	-	-	-	-	-	-	-
ENSOCUG00000010835	370.1455425	284.9558451	455.3352399	1.597915073	0.676190733	0.065382157	1	4	6798942	6913384	+	3313	NOL4L	GO:0005654;GO:0005829;	-	-	S	0V5RC;0DG1G;1AUJ8;1CQR2;13KT5;0UIWF;09URW;0IHZD	nucleolar protein 4 like [Source:HGNC Symbol;Acc:HGNC:16106]	100345323	G1T027
ENSOCUG00000002530	6035.106424	4940.884101	7129.328746	1.442925719	0.528997033	0.065506499	1	GL018699	4844439	4872392	-	3539	PTGS1	GO:0001516;GO:0004601;GO:0004666;GO:0006954;GO:0006979;GO:0008217;GO:0019371;GO:0020037;GO:0055114;GO:0001516;GO:0001516;GO:0004601;GO:0004601;GO:0004666;GO:0004666;GO:0006954;GO:0006954;GO:0006979;GO:0006979;GO:0008217;GO:0008217;GO:0019371;GO:0019371;GO:0020037;GO:0020037;GO:0055114;GO:0055114;GO:0098869;GO:0001516;GO:0004601;GO:0004666;GO:0006954;GO:0006979;GO:0008217;GO:0019371;GO:0020037;GO:…	K00509	EC:1.14.99.1	S;U	0V8DS;09YZ0;KOG2408;0DP9V;1CY7W;0UH8W;12RSZ;1ATPF	prostaglandin-endoperoxide synthase 1 [Source:HGNC Symbol;Acc:HGNC:9604]	100009407	O97554
ENSOCUG00000003061	23.14323863	37.46272135	8.82375591	0.235534302	-2.085990916	0.065628738	1	GL018759	980722	1029659	-	2322	SV2B	GO:0005887;GO:0007268;GO:0007268;GO:0008021;GO:0016020;GO:0016020;GO:0016020;GO:0016021;GO:0016021;GO:0016021;GO:0022857;GO:0022857;GO:0055085;GO:0055085;	K06258	-	I;G	0V9S8;1AXMS;KOG0255;09Y6V;0DK91;0UN50;1CV7Y;12TYV	synaptic vesicle glycoprotein 2B [Source:HGNC Symbol;Acc:HGNC:16874]	100342160	-
ENSOCUG00000005257	472.2118309	378.2014425	566.2222194	1.497144526	0.582213498	0.065639008	1	11	56242232	56266775	+	1830	DNAJC21	GO:0003676;GO:0003676;GO:0008270;GO:0008270;GO:0046872;	K09506	-	O	0DJQB;0V6AK;1CUHB;1B030;KOG0717;KOG0714;0UNU6;09VBA;12P7C	DnaJ heat shock protein family (Hsp40) member C21 [Source:HGNC Symbol;Acc:HGNC:27030]	100341177	-
ENSOCUG00000028986	45.64607136	59.89155707	31.40058565	0.524290688	-0.931561173	0.0657851	1	9	8169612	8170607	-	996	ZNF660	GO:0003676;GO:0003676;	-	-	K	0DQ39;0VDP0;KOG1721;0A2TE;140JH;1B472;1CZHK;0UTP1	zinc finger protein 660 [Source:HGNC Symbol;Acc:HGNC:26720]	100341943	G1U9M6
ENSOCUG00000009922	527.1182636	637.1211918	417.1153355	0.654687587	-0.61112147	0.065808279	1	17	41400322	41407910	-	3015	ZNF219	GO:0000122;GO:0000978;GO:0001227;GO:0003676;GO:0003676;GO:0003677;GO:0003700;GO:0005634;GO:0005634;GO:0005654;GO:0006351;GO:0006355;GO:0032332;GO:0045892;GO:0045944;GO:0060174;	-	-	K	09ZM1;1AY9Q;1CVZN;0DM4M;13H9Z;0UGWP;KOG1721;0VAHP	zinc finger protein 219 [Source:HGNC Symbol;Acc:HGNC:13011]	100356826	-
ENSOCUG00000017608	593.3261767	714.2573463	472.395007	0.661379277	-0.596450253	0.065984784	1	13	67727869	67807643	-	2161	PTBP2	GO:0003676;GO:0003676;GO:0003723;GO:0003723;GO:0003723;GO:0003729;GO:0005634;GO:0005634;GO:0005681;GO:0006376;GO:0006397;GO:0006397;GO:0033119;GO:2000177;GO:0003676;GO:0003723;GO:0005634;GO:0006397;	K14948	-	A	1CUAY;1ATD9;0UJ8H;0V6WG;09VY1;0DH6N;12QC1;KOG1190	polypyrimidine tract binding protein 2 [Source:HGNC Symbol;Acc:HGNC:17662]	100349676	-
ENSOCUG00000016125	1566.459635	1955.2946	1177.624671	0.602274803	-0.731506191	0.066310498	1	9	53442940	54316986	-	4727	PTPRM	GO:0001937;GO:0004721;GO:0004725;GO:0004725;GO:0004725;GO:0005001;GO:0005515;GO:0005913;GO:0006470;GO:0006470;GO:0006470;GO:0007156;GO:0007165;GO:0010596;GO:0010842;GO:0016020;GO:0016020;GO:0016020;GO:0016021;GO:0016311;GO:0016311;GO:0016525;GO:0016787;GO:0016791;GO:0016791;GO:0030027;GO:0031175;GO:0031290;GO:0035335;GO:0042493;GO:0045296;GO:0048471;GO:0004725;GO:0005515;GO:0006470;GO:0016020;GO:…	K05693	EC:3.1.3.48	T	1CU3F;0UKKH;KOG4228;1AY4W;0DJB7;13DXY;0V8W3;09V8F	protein tyrosine phosphatase receptor type M [Source:HGNC Symbol;Acc:HGNC:9675]	100356969	-
ENSOCUG00000000749	791.3437513	634.960251	947.7272517	1.492577292	0.577805642	0.066325539	1	1	159269686	159291562	+	1367	HTATIP2	GO:0005635;GO:0005737;GO:0005829;GO:0016620;GO:0016620;GO:0045765;GO:0051170;GO:0051287;GO:0051287;GO:0055114;GO:0055114;	K17290	EC:1.1.1.-	T	1B0H7;1CZ4A;0DR0M;0URWE;0A0F2;0VE7Z;KOG4039;13GZU	HIV-1 Tat interactive protein 2 [Source:HGNC Symbol;Acc:HGNC:16637]	100338039	G1SDZ5
ENSOCUG00000009080	18.51112458	26.76341683	10.25883233	0.383315493	-1.383395783	0.066393185	1	5	27440727	27471842	+	2728	PMFBP1	GO:0005737;GO:0007283;GO:0007283;GO:0097224;GO:0097224;	K23223	-	K	0V7JP;1CSM8;1B09M;0IV92;13M1H;0UHBF;09WM1;0DHWM	polyamine modulated factor 1 binding protein 1 [Source:HGNC Symbol;Acc:HGNC:17728]	100344471	-
ENSOCUG00000015999	8.048598052	3.213687303	12.8835088	4.008949095	2.003224098	0.066594535	1	16	42123285	42512185	-	6162	MALRD1	GO:0005515;GO:0005737;GO:0005794;GO:0016020;GO:0016020;GO:0042632;GO:0070858;	-	-	S;O;T	0IGZP;1CSGR;0UK1M;0DHSH;1B02B;12PXN;09WH0;0V7FH	MAM and LDL receptor class A domain containing 1 [Source:HGNC Symbol;Acc:HGNC:24331]	-	-
ENSOCUG00000012498	135.8975389	167.3593981	104.4356798	0.624020407	-0.680334885	0.066599073	1	GL018714	873348	876405	-	1113	METTL1	GO:0000049;GO:0003723;GO:0005634;GO:0005634;GO:0005654;GO:0005730;GO:0005829;GO:0006400;GO:0006400;GO:0006400;GO:0008033;GO:0008168;GO:0008176;GO:0008176;GO:0008176;GO:0008176;GO:0016740;GO:0030488;GO:0032259;GO:0106004;	K03439	EC:2.1.1.33	J	12NAP;0DGRM;KOG3115;1CRFM;09VGW;1B3UV;0UIM4;0V6G5	methyltransferase like 1 [Source:HGNC Symbol;Acc:HGNC:7030]	100346830	G1T3F6
ENSOCUG00000027517	313.6095032	248.3142063	378.9048	1.525908669	0.609668615	0.066689422	1	GL018919	240165	293626	+	1505	-	GO:0016020;GO:0016021;	-	-	S	1D28D;13X83;0UUK7;0DSXE;0A4JH;0J32Q;0VGH5;1AS1P	-	-	-
ENSOCUG00000000228	202.9679542	158.3194796	247.6164287	1.564030082	0.645268261	0.06674376	1	GL018746	600715	690300	+	4193	DNAJA4	GO:0005829;GO:0006457;GO:0010596;GO:0010628;GO:0016020;GO:0031072;GO:0042026;GO:0051082;GO:0051082;GO:0051087;GO:0090084;GO:0006457;GO:0006457;GO:0031072;GO:0031072;GO:0046872;GO:0051082;GO:0051082;	K09505	-	O	0DM9W;0V62A;12NR7;KOG0712;0UP5A;1AYQI;09UMX;1CW4Z	DnaJ heat shock protein family (Hsp40) member A4 [Source:HGNC Symbol;Acc:HGNC:14885]	100341385	-
ENSOCUG00000003633	92.39806908	120.1684725	64.62766569	0.537808831	-0.89483465	0.066850508	1	18	63586076	63809131	-	1895	GFRA1	GO:0005886;GO:0016020;GO:0031225;GO:0038023;GO:0038023;GO:0007399;GO:0038023;GO:0038023;	K19895	-	W;T	1CX4S;0UJDA;0A0KS;1B3DT;0DN85;12ZWR;0VBGZ;0IU4F	GDNF family receptor alpha 1 [Source:HGNC Symbol;Acc:HGNC:4243]	100338839	-
ENSOCUG00000010669	194.179503	235.8385761	152.5204299	0.646715361	-0.628797217	0.06686341	1	9	107630062	107633700	-	3639	DSEL	GO:0008146;GO:0008146;GO:0016020;GO:0016021;	-	-	O	0E6PM;0B1GD;12WPK;1BAFU;0IE6W;0V1VW;0WE2A;1DDMP	dermatan sulfate epimerase like [Source:HGNC Symbol;Acc:HGNC:18144]	100341351	-
ENSOCUG00000025266	206.9775447	251.8914773	162.0636122	0.643386644	-0.636242108	0.067072923	1	12	23835504	23866589	+	1410	ZBTB9	GO:0003676;GO:0003676;GO:0005515;	-	-	K	13KC7;09ZAB;0DKSM;KOG1721;1B4MG;0UHAB;0VA7N;1CVME	zinc finger and BTB domain containing 9 [Source:HGNC Symbol;Acc:HGNC:28323]	-	-
[truncated: 16,048 more rows]
