# Supplementary material for: Coprophagy Prevention Affects the Reproductive Performance in New Zealand White Rabbits Is Mediated through Nox4-ROS-NFκB Pathway
Source: Oxid Med Cell Longev. 2022 Dec 21;2022:8999899. doi: 10.1155/2022/8999899 (PMC11401658; doi:10.1155/2022/8999899)
Supplement: Supplementary Materials — Supplementary Figure S1: quality and accuracy analysis of transcriptome sequencing data. (A) Expression patterns of all genes in the sample. (B) Correlation of gene expression levels between samples. (C) Principal component analysis results of all samples. Supplementary Figure S2: verification of the accuracy of transcriptome sequencing results. (A) RT-qPCR results. (B) Differential multiples of gene expression in transcriptome sequencing. Supplementary Table S1: the diet composition of rabbits. Supplementary Table S2: the primers for RT-qPCR. Supplementary Table S3: RT-qPCR system and procedure. Supplementary Table S4: transcriptome sequencing data output report. Supplementary Table S5: analysis of differentially expressed genes. Supplementary Table S6: enrichment analysis of GO Terms. Supplementary Table S7: enrichment analysis of KEGG metabolic pathway. [file 8999899.f1.zip › Supplementary Table S6 (1).txt]

Category	GO.ID	Term	Up	Down	DEG	Total	Pvalue
CC	GO:0005576	extracellular region	36	19	55	1113	0.00000004
BP	GO:0022900	electron transport chain	11	2	13	116	0.0000023
MF	GO:0008137	NADH dehydrogenase (ubiquinone) activity	5	1	6	20	0.0000038
MF	GO:0050136	NADH dehydrogenase (quinone) activity	5	1	6	20	0.0000038
CC	GO:0044421	extracellular region part	25	13	38	755	0.0000043
MF	GO:0005509	calcium ion binding	20	9	29	526	0.0000091
MF	GO:0003954	NADH dehydrogenase activity	5	1	6	25	0.000016
MF	GO:0016655	oxidoreductase activity, acting on NAD(P)H, quinone or similar compound as acceptor	5	1	6	26	0.00002
BP	GO:0022904	respiratory electron transport chain	6	2	8	55	0.000032
CC	GO:0005615	extracellular space	20	9	29	588	0.000091
BP	GO:0034505	tooth mineralization	2	2	4	12	0.00011
MF	GO:0016651	oxidoreductase activity, acting on NAD(P)H	5	3	8	66	0.00012
BP	GO:0090287	regulation of cellular response to growth factor stimulus	8	5	13	167	0.00012
CC	GO:0031012	extracellular matrix	7	5	12	150	0.00018
MF	GO:0070566	adenylyltransferase activity	3	2	5	25	0.00021
BP	GO:0090288	negative regulation of cellular response to growth factor stimulus	5	4	9	92	0.00024
BP	GO:0009141	nucleoside triphosphate metabolic process	8	6	14	208	0.0003
BP	GO:0042773	ATP synthesis coupled electron transport	4	2	6	41	0.00031
BP	GO:0072521	purine-containing compound metabolic process	11	6	17	295	0.00044
MF	GO:0005111	type 2 fibroblast growth factor receptor binding	1	1	2	2	0.00051
BP	GO:0046034	ATP metabolic process	8	4	12	170	0.00052
BP	GO:0009144	purine nucleoside triphosphate metabolic process	8	5	13	195	0.00053
CC	GO:0070469	respiratory chain	8	0	8	82	0.00058
BP	GO:0007156	homophilic cell adhesion via plasma membrane adhesion molecules	6	2	8	87	0.00081
BP	GO:0097186	amelogenesis	1	2	3	9	0.00089
BP	GO:0098742	cell-cell adhesion via plasma-membrane adhesion molecules	6	4	10	133	0.00093
BP	GO:0055085	transmembrane transport	25	15	40	1055	0.00099
BP	GO:0050678	regulation of epithelial cell proliferation	7	6	13	209	0.00102
MF	GO:0009055	electron transfer activity	8	0	8	91	0.00105
MF	GO:0005215	transporter activity	27	11	38	997	0.00108
BP	GO:0009123	nucleoside monophosphate metabolic process	8	5	13	211	0.00111
BP	GO:0009117	nucleotide metabolic process	11	7	18	352	0.00121
BP	GO:0055086	nucleobase-containing small molecule metabolic process	12	7	19	382	0.00123
BP	GO:0009205	purine ribonucleoside triphosphate metabolic process	8	4	12	189	0.00132
BP	GO:0006753	nucleoside phosphate metabolic process	11	7	18	355	0.00133
BP	GO:0009167	purine ribonucleoside monophosphate metabolic process	8	4	12	190	0.00139
BP	GO:0006820	anion transport	11	6	17	328	0.00142
BP	GO:0009126	purine nucleoside monophosphate metabolic process	8	4	12	191	0.00145
BP	GO:0009199	ribonucleoside triphosphate metabolic process	8	4	12	191	0.00145
MF	GO:0001730	2'-5'-oligoadenylate synthetase activity	0	2	2	3	0.00151
MF	GO:0070051	fibrinogen binding	1	1	2	3	0.00151
BP	GO:0001554	luteolysis	0	2	2	3	0.00153
BP	GO:0030538	embryonic genitalia morphogenesis	1	1	2	3	0.00153
BP	GO:0051414	response to cortisol	1	1	2	3	0.00153
BP	GO:0061364	apoptotic process involved in luteolysis	0	2	2	3	0.00153
CC	GO:0071953	elastic fiber	2	0	2	3	0.00155
MF	GO:0005102	receptor binding	20	14	34	880	0.00158
BP	GO:0006163	purine nucleotide metabolic process	9	6	15	275	0.00163
BP	GO:0006119	oxidative phosphorylation	4	2	6	56	0.00166
CC	GO:0031224	intrinsic component of membrane	93	46	139	4948	0.00168
BP	GO:0017144	drug metabolic process	2	1	3	11	0.00169
CC	GO:0098803	respiratory chain complex	6	0	6	56	0.00173
BP	GO:0006811	ion transport	25	14	39	1053	0.00176
BP	GO:0009161	ribonucleoside monophosphate metabolic process	8	4	12	196	0.0018
BP	GO:0015711	organic anion transport	9	4	13	224	0.0019
BP	GO:0050673	epithelial cell proliferation	8	6	14	252	0.00195
CC	GO:0045263	proton-transporting ATP synthase complex, coupling factor F(o)	2	2	4	24	0.00202
BP	GO:0010812	negative regulation of cell-substrate adhesion	4	1	5	40	0.00203
BP	GO:0009605	response to external stimulus	20	22	42	1171	0.00215
BP	GO:0009142	nucleoside triphosphate biosynthetic process	3	3	6	59	0.00218
BP	GO:0006754	ATP biosynthetic process	3	2	5	41	0.00227
BP	GO:0015718	monocarboxylic acid transport	6	1	7	80	0.00228
MF	GO:0016491	oxidoreductase activity	20	7	27	663	0.00232
BP	GO:0015849	organic acid transport	8	2	10	151	0.00241
BP	GO:0046942	carboxylic acid transport	8	2	10	151	0.00241
BP	GO:0045333	cellular respiration	6	2	8	103	0.00242
MF	GO:0022891	substrate-specific transmembrane transporter activity	18	10	28	699	0.00245
BP	GO:2000369	regulation of clathrin-dependent endocytosis	3	0	3	13	0.00283
MF	GO:0008514	organic anion transmembrane transporter activity	6	1	7	84	0.0029
MF	GO:0046943	carboxylic acid transmembrane transporter activity	5	1	6	63	0.00294
BP	GO:0007166	cell surface receptor signaling pathway	29	21	50	1483	0.00294
MF	GO:0015467	G-protein activated inward rectifier potassium channel activity	1	1	2	4	0.00297
MF	GO:0043546	molybdopterin cofactor binding	2	0	2	4	0.00297
CC	GO:0098793	presynapse	9	2	11	180	0.00299
BP	GO:0007016	cytoskeletal anchoring at plasma membrane	1	1	2	4	0.00301
BP	GO:0016338	calcium-independent cell-cell adhesion via plasma membrane cell-adhesion molecules	0	2	2	4	0.00301
BP	GO:0031960	response to corticosteroid	2	2	4	27	0.00306
BP	GO:0051384	response to glucocorticoid	2	2	4	27	0.00306
CC	GO:0031226	intrinsic component of plasma membrane	19	7	26	634	0.00309
MF	GO:0022892	substrate-specific transporter activity	20	10	30	780	0.00317
MF	GO:0022857	transmembrane transporter activity	21	11	32	849	0.00317
MF	GO:0015077	monovalent inorganic cation transmembrane transporter activity	11	4	15	297	0.00319
MF	GO:0005342	organic acid transmembrane transporter activity	5	1	6	65	0.00344
BP	GO:0009798	axis specification	5	0	5	45	0.00344
CC	GO:0016021	integral component of membrane	91	45	136	4905	0.00345
BP	GO:0030850	prostate gland development	3	1	4	28	0.00351
BP	GO:0070207	protein homotrimerization	2	1	3	14	0.00354
BP	GO:1902547	regulation of cellular response to vascular endothelial growth factor stimulus	3	0	3	14	0.00354
CC	GO:0098889	intrinsic component of presynaptic membrane	4	0	4	28	0.00362
CC	GO:0098688	parallel fiber to Purkinje cell synapse	3	0	3	14	0.00362
MF	GO:0008509	anion transmembrane transporter activity	6	4	10	161	0.00364
CC	GO:0044425	membrane part	101	51	152	5595	0.00382
MF	GO:0015075	ion transmembrane transporter activity	17	9	26	654	0.00383
BP	GO:0006091	generation of precursor metabolites and energy	12	2	14	273	0.00402
MF	GO:0005178	integrin binding	1	5	6	68	0.00431
BP	GO:0060572	morphogenesis of an epithelial bud	3	0	3	15	0.00435
BP	GO:0007155	cell adhesion	19	10	29	758	0.00438
BP	GO:0048010	vascular endothelial growth factor receptor signaling pathway	3	1	4	30	0.00454
BP	GO:0042475	odontogenesis of dentin-containing tooth	3	2	5	48	0.00456
BP	GO:0006935	chemotaxis	8	8	16	337	0.00461
BP	GO:0042330	taxis	8	8	16	338	0.00474
BP	GO:0022610	biological adhesion	19	10	29	763	0.00479
MF	GO:0050839	cell adhesion molecule binding	3	5	8	116	0.00482
MF	GO:1990817	RNA adenylyltransferase activity	2	0	2	5	0.00487
BP	GO:0048608	reproductive structure development	6	7	13	250	0.00488
BP	GO:0006958	complement activation, classical pathway	2	0	2	5	0.00494
BP	GO:0061458	reproductive system development	6	7	13	251	0.00505
BP	GO:1905330	regulation of morphogenesis of an epithelium	6	0	6	70	0.00514
MF	GO:0015078	hydrogen ion transmembrane transporter activity	6	2	8	118	0.00534
BP	GO:0009206	purine ribonucleoside triphosphate biosynthetic process	3	2	5	50	0.00544
BP	GO:0042476	odontogenesis	3	3	6	71	0.00551
BP	GO:0048661	positive regulation of smooth muscle cell proliferation	2	2	4	32	0.00574
BP	GO:0001936	regulation of endothelial cell proliferation	3	3	6	72	0.0059
BP	GO:2000181	negative regulation of blood vessel morphogenesis	4	2	6	72	0.0059
BP	GO:0009145	purine nucleoside triphosphate biosynthetic process	3	2	5	51	0.00592
BP	GO:0055114	oxidation-reduction process	22	7	29	775	0.00593
MF	GO:0005504	fatty acid binding	2	1	3	17	0.00616
MF	GO:1901618	organic hydroxy compound transmembrane transporter activity	2	1	3	17	0.00616
MF	GO:0003725	double-stranded RNA binding	0	5	5	52	0.00624
BP	GO:0060512	prostate gland morphogenesis	3	0	3	17	0.00628
BP	GO:1901342	regulation of vasculature development	5	6	11	201	0.00642
CC	GO:0031526	brush border membrane	2	1	3	17	0.00643
BP	GO:0009201	ribonucleoside triphosphate biosynthetic process	3	2	5	52	0.00644
CC	GO:0045259	proton-transporting ATP synthase complex	2	2	4	33	0.00661
BP	GO:0015908	fatty acid transport	4	1	5	53	0.00698
BP	GO:0015985	energy coupled proton transport, down electrochemical gradient	2	2	4	34	0.00715
BP	GO:0015986	ATP synthesis coupled proton transport	2	2	4	34	0.00715
BP	GO:0031109	microtubule polymerization or depolymerization	2	4	6	75	0.00719
MF	GO:0004890	GABA-A receptor activity	1	2	3	18	0.00726
MF	GO:0008483	transaminase activity	3	0	3	18	0.00726
BP	GO:0039530	MDA-5 signaling pathway	0	2	2	6	0.0073
BP	GO:0044062	regulation of excretion	1	1	2	6	0.0073
BP	GO:0060054	positive regulation of epithelial cell proliferation involved in wound healing	1	1	2	6	0.0073
BP	GO:0070170	regulation of tooth mineralization	1	1	2	6	0.0073
BP	GO:1903975	regulation of glial cell migration	0	2	2	6	0.0073
CC	GO:0033177	proton-transporting two-sector ATPase complex, proton-transporting domain	2	2	4	34	0.00736
BP	GO:0042308	negative regulation of protein import into nucleus	2	1	3	18	0.00741
BP	GO:1904590	negative regulation of protein import	2	1	3	18	0.00741
CC	GO:0001527	microfibril	2	0	2	6	0.00743
BP	GO:0009150	purine ribonucleotide metabolic process	9	4	13	264	0.00762
BP	GO:1901343	negative regulation of vasculature development	4	2	6	77	0.00815
BP	GO:0003006	developmental process involved in reproduction	10	7	17	391	0.00838
MF	GO:0008028	monocarboxylic acid transmembrane transporter activity	3	0	3	19	0.00848
MF	GO:0016769	transferase activity, transferring nitrogenous groups	3	0	3	19	0.00848
BP	GO:0070206	protein trimerization	2	1	3	19	0.00866
BP	GO:0007586	digestion	3	2	5	57	0.00946
BP	GO:0009259	ribonucleotide metabolic process	9	4	13	272	0.00965
MF	GO:0051537	2 iron, 2 sulfur cluster binding	2	1	3	20	0.00982
BP	GO:0033993	response to lipid	6	10	16	366	0.00988
MF	GO:0008093	cytoskeletal adaptor activity	2	0	2	7	0.00993
BP	GO:0030947	regulation of vascular endothelial growth factor receptor signaling pathway	2	1	3	20	0.01001
BP	GO:0019637	organophosphate metabolic process	15	9	24	632	0.01003
BP	GO:0070166	enamel mineralization	1	1	2	7	0.01007
BP	GO:0048660	regulation of smooth muscle cell proliferation	3	2	5	58	0.01016
CC	GO:0005887	integral component of plasma membrane	17	6	23	594	0.01023
CC	GO:0070069	cytochrome complex	3	0	3	20	0.01025
BP	GO:0006952	defense response	16	10	26	705	0.01072
MF	GO:0016917	GABA receptor activity	1	2	3	21	0.01126
MF	GO:0042056	chemoattractant activity	2	1	3	21	0.01126
BP	GO:0015672	monovalent inorganic cation transport	10	5	15	340	0.01136
BP	GO:0001935	endothelial cell proliferation	3	3	6	83	0.0116
BP	GO:0048659	smooth muscle cell proliferation	3	2	5	60	0.01168
BP	GO:0019693	ribose phosphate metabolic process	9	4	13	279	0.01176
CC	GO:0099056	integral component of presynaptic membrane	3	0	3	21	0.01176
BP	GO:1901135	carbohydrate derivative metabolic process	16	10	26	712	0.01205
BP	GO:0032502	developmental process	56	37	93	3308	0.0123
BP	GO:0009127	purine nucleoside monophosphate biosynthetic process	3	2	5	61	0.01249
BP	GO:0009168	purine ribonucleoside monophosphate biosynthetic process	3	2	5	61	0.01249
BP	GO:0040013	negative regulation of locomotion	4	6	10	192	0.01267
BP	GO:0015909	long-chain fatty acid transport	3	1	4	40	0.01267
BP	GO:0051607	defense response to virus	0	7	7	110	0.01287
BP	GO:2000026	regulation of multicellular organismal development	23	15	38	1152	0.01315
CC	GO:0016020	membrane	114	59	173	6670	0.01318
BP	GO:0030949	positive regulation of vascular endothelial growth factor receptor signaling pathway	1	1	2	8	0.01323
BP	GO:1902548	negative regulation of cellular response to vascular endothelial growth factor stimulus	2	0	2	8	0.01323
BP	GO:0051179	localization	68	39	107	3896	0.01335
BP	GO:1902600	hydrogen ion transmembrane transport	5	2	7	112	0.01411
BP	GO:0046903	secretion	12	10	22	584	0.01458
BP	GO:0060571	morphogenesis of an epithelial fold	3	0	3	23	0.0148
BP	GO:0009165	nucleotide biosynthetic process	5	4	9	168	0.01487
BP	GO:0071396	cellular response to lipid	5	8	13	288	0.01497
BP	GO:2000379	positive regulation of reactive oxygen species metabolic process	3	1	4	42	0.01498
BP	GO:0017015	regulation of transforming growth factor beta receptor signaling pathway	2	3	5	64	0.01515
BP	GO:0050680	negative regulation of epithelial cell proliferation	3	3	6	88	0.01517
BP	GO:1901293	nucleoside phosphate biosynthetic process	5	4	9	169	0.01541
BP	GO:0048856	anatomical structure development	53	35	88	3132	0.01546
CC	GO:0016469	proton-transporting two-sector ATPase complex	3	2	5	64	0.01566
BP	GO:1903844	regulation of cellular response to transforming growth factor beta stimulus	2	3	5	65	0.01612
BP	GO:0007275	multicellular organism development	45	35	80	2812	0.01613
MF	GO:0048018	receptor ligand activity	8	5	13	293	0.01616
BP	GO:0010633	negative regulation of epithelial cell migration	1	3	4	43	0.01623
BP	GO:0010827	regulation of glucose transport	0	4	4	43	0.01623
BP	GO:1903901	negative regulation of viral life cycle	1	3	4	43	0.01623
BP	GO:0001953	negative regulation of cell-matrix adhesion	2	1	3	24	0.01663
BP	GO:0033144	negative regulation of intracellular steroid hormone receptor signaling pathway	1	2	3	24	0.01663
BP	GO:0046823	negative regulation of nucleocytoplasmic transport	2	1	3	24	0.01663
BP	GO:0090092	regulation of transmembrane receptor protein serine/threonine kinase signaling pathway	4	4	8	143	0.01667
BP	GO:0007263	nitric oxide mediated signal transduction	1	1	2	9	0.01675
BP	GO:0032288	myelin assembly	2	0	2	9	0.01675
BP	GO:0035112	genitalia morphogenesis	1	1	2	9	0.01675
BP	GO:0060513	prostatic bud formation	2	0	2	9	0.01675
BP	GO:1903587	regulation of blood vessel endothelial cell proliferation involved in sprouting angiogenesis	1	1	2	9	0.01675
BP	GO:2000027	regulation of organ morphogenesis	6	1	7	116	0.01683
BP	GO:0070887	cellular response to chemical stimulus	24	25	49	1590	0.01692
CC	GO:0060076	excitatory synapse	3	0	3	24	0.01701
BP	GO:0071363	cellular response to growth factor stimulus	9	6	15	357	0.01703
MF	GO:0008083	growth factor activity	3	3	6	91	0.01708
BP	GO:0006875	cellular metal ion homeostasis	8	4	12	262	0.01714
BP	GO:0071310	cellular response to organic substance	19	21	40	1250	0.01751
BP	GO:2000146	negative regulation of cell motility	4	5	9	173	0.01769
BP	GO:0001655	urogenital system development	5	5	10	203	0.01806
BP	GO:0006869	lipid transport	7	3	10	203	0.01806
BP	GO:0009156	ribonucleoside monophosphate biosynthetic process	3	2	5	67	0.01817
BP	GO:0090049	regulation of cell migration involved in sprouting angiogenesis	1	2	3	25	0.01859
BP	GO:0002252	immune effector process	5	10	15	361	0.01863
BP	GO:0090407	organophosphate biosynthetic process	8	5	13	297	0.01882
BP	GO:0071222	cellular response to lipopolysaccharide	2	4	6	93	0.01943
CC	GO:0042734	presynaptic membrane	4	0	4	45	0.01945
BP	GO:0022603	regulation of anatomical structure morphogenesis	13	8	21	566	0.01953
BP	GO:0006818	hydrogen transport	5	2	7	120	0.0199
BP	GO:0015992	proton transport	5	2	7	120	0.0199
BP	GO:0009887	animal organ morphogenesis	12	10	22	602	0.01992
BP	GO:0007548	sex differentiation	3	5	8	148	0.02008
BP	GO:0098542	defense response to other organism	4	7	11	237	0.02012
BP	GO:0055065	metal ion homeostasis	8	5	13	300	0.02026
BP	GO:0070848	response to growth factor	9	6	15	365	0.02035
BP	GO:0031589	cell-substrate adhesion	9	1	10	207	0.02038
BP	GO:0006516	glycoprotein catabolic process	2	0	2	10	0.02063
BP	GO:0016082	synaptic vesicle priming	1	1	2	10	0.02063
BP	GO:0040037	negative regulation of fibroblast growth factor receptor signaling pathway	1	1	2	10	0.02063
BP	GO:0045737	positive regulation of cyclin-dependent protein serine/threonine kinase activity	2	0	2	10	0.02063
BP	GO:0051895	negative regulation of focal adhesion assembly	2	0	2	10	0.02063
BP	GO:0060601	lateral sprouting from an epithelium	2	0	2	10	0.02063
BP	GO:0090051	negative regulation of cell migration involved in sprouting angiogenesis	0	2	2	10	0.02063
BP	GO:1902358	sulfate transmembrane transport	0	2	2	10	0.02063
BP	GO:0048566	embryonic digestive tract development	1	2	3	26	0.02066
BP	GO:0050873	brown fat cell differentiation	2	1	3	26	0.02066
BP	GO:0060071	Wnt signaling pathway, planar cell polarity pathway	3	0	3	26	0.02066
BP	GO:0090175	regulation of establishment of planar polarity	3	0	3	26	0.02066
BP	GO:0006164	purine nucleotide biosynthetic process	4	3	7	121	0.02072
BP	GO:0010810	regulation of cell-substrate adhesion	6	1	7	121	0.02072
BP	GO:0002009	morphogenesis of an epithelium	10	3	13	303	0.02178
BP	GO:0006954	inflammatory response	10	3	13	303	0.02178
BP	GO:0034220	ion transmembrane transport	13	12	25	714	0.02182
BP	GO:0022600	digestive system process	3	1	4	47	0.02186
MF	GO:0000048	peptidyltransferase activity	1	0	1	1	0.02261
MF	GO:0002951	leukotriene-C(4) hydrolase	1	0	1	1	0.02261
MF	GO:0004021	L-alanine:2-oxoglutarate aminotransferase activity	1	0	1	1	0.02261
MF	GO:0004028	3-chloroallyl aldehyde dehydrogenase activity	0	1	1	1	0.02261
MF	GO:0004360	glutamine-fructose-6-phosphate transaminase (isomerizing) activity	1	0	1	1	0.02261
MF	GO:0004587	ornithine-oxo-acid transaminase activity	1	0	1	1	0.02261
MF	GO:0004854	xanthine dehydrogenase activity	1	0	1	1	0.02261
MF	GO:0004855	xanthine oxidase activity	1	0	1	1	0.02261
MF	GO:0008119	thiopurine S-methyltransferase activity	1	0	1	1	0.02261
MF	GO:0015054	gastrin receptor activity	1	0	1	1	0.02261
MF	GO:0015055	secretin receptor activity	1	0	1	1	0.02261
MF	GO:0015132	prostaglandin transmembrane transporter activity	1	0	1	1	0.02261
MF	GO:0016726	oxidoreductase activity, acting on CH or CH2 groups, NAD or NADP as acceptor	1	0	1	1	0.02261
MF	GO:0016727	oxidoreductase activity, acting on CH or CH2 groups, oxygen as acceptor	1	0	1	1	0.02261
MF	GO:0018729	propionate CoA-transferase activity	1	0	1	1	0.02261
MF	GO:0030160	GKAP/Homer scaffold activity	1	0	1	1	0.02261
MF	GO:0031707	endothelin A receptor binding	0	1	1	1	0.02261
MF	GO:0031737	CX3C chemokine receptor binding	0	1	1	1	0.02261
MF	GO:0031739	cholecystokinin receptor binding	1	0	1	1	0.02261
MF	GO:0031741	type B gastrin/cholecystokinin receptor binding	1	0	1	1	0.02261
MF	GO:0032448	DNA hairpin binding	0	1	1	1	0.02261
MF	GO:0033842	N-acetyl-beta-glucosaminyl-glycoprotein 4-beta-N-acetylgalactosaminyltransferase activity	0	1	1	1	0.02261
MF	GO:0033862	UMP kinase activity	0	1	1	1	0.02261
MF	GO:0042131	thiamine phosphate phosphatase activity	1	0	1	1	0.02261
MF	GO:0045237	CXCR1 chemokine receptor binding	0	1	1	1	0.02261
MF	GO:0047635	alanine-oxo-acid transaminase activity	1	0	1	1	0.02261
MF	GO:0050145	nucleoside phosphate kinase activity	0	1	1	1	0.02261
MF	GO:0070287	ferritin receptor activity	1	0	1	1	0.02261
MF	GO:0070892	lipoteichoic acid receptor activity	1	0	1	1	0.02261
MF	GO:0071714	icosanoid transmembrane transporter activity	1	0	1	1	0.02261
MF	GO:0072591	citrate-L-glutamate ligase activity	0	1	1	1	0.02261
MF	GO:0099510	calcium ion binding involved in regulation of cytosolic calcium ion concentration	1	0	1	1	0.02261
MF	GO:0099534	calcium ion binding involved in regulation of presynaptic cytosolic calcium ion concentration	1	0	1	1	0.02261
BP	GO:0016525	negative regulation of angiogenesis	3	2	5	71	0.02278
BP	GO:0002174	mammary stem cell proliferation	0	1	1	1	0.02278
BP	GO:0002270	plasmacytoid dendritic cell activation	1	0	1	1	0.02278
BP	GO:0003335	corneocyte development	1	0	1	1	0.02278
BP	GO:0003421	growth plate cartilage axis specification	1	0	1	1	0.02278
BP	GO:0009115	xanthine catabolic process	1	0	1	1	0.02278
BP	GO:0019646	aerobic electron transport chain	1	0	1	1	0.02278
BP	GO:0030185	nitric oxide transport	0	1	1	1	0.02278
BP	GO:0031583	phospholipase D-activating G-protein coupled receptor signaling pathway	0	1	1	1	0.02278
BP	GO:0034395	regulation of transcription from RNA polymerase II promoter in response to iron	1	0	1	1	0.02278
BP	GO:0034439	lipoprotein lipid oxidation	1	0	1	1	0.02278
BP	GO:0035026	leading edge cell differentiation	1	0	1	1	0.02278
BP	GO:0035700	astrocyte chemotaxis	0	1	1	1	0.02278
BP	GO:0036145	dendritic cell homeostasis	0	1	1	1	0.02278
BP	GO:0042313	protein kinase C deactivation	0	1	1	1	0.02278
BP	GO:0042631	cellular response to water deprivation	0	1	1	1	0.02278
BP	GO:0043179	rhythmic excitation	0	1	1	1	0.02278
BP	GO:0044722	renal phosphate excretion	1	0	1	1	0.02278
BP	GO:0048619	embryonic hindgut morphogenesis	0	1	1	1	0.02278
BP	GO:0048749	compound eye development	0	1	1	1	0.02278
BP	GO:0050674	urothelial cell proliferation	1	0	1	1	0.02278
BP	GO:0050675	regulation of urothelial cell proliferation	1	0	1	1	0.02278
BP	GO:0050677	positive regulation of urothelial cell proliferation	1	0	1	1	0.02278
BP	GO:0050902	leukocyte adhesive activation	0	1	1	1	0.02278
BP	GO:0051041	positive regulation of calcium-independent cell-cell adhesion	0	1	1	1	0.02278
BP	GO:0051771	negative regulation of nitric-oxide synthase biosynthetic process	0	1	1	1	0.02278
BP	GO:0060243	negative regulation of cell growth involved in contact inhibition	1	0	1	1	0.02278
BP	GO:0060432	lung pattern specification process	1	0	1	1	0.02278
BP	GO:0060436	bronchiole morphogenesis	1	0	1	1	0.02278
BP	GO:0060495	cell-cell signaling involved in lung development	1	0	1	1	0.02278
BP	GO:0060496	mesenchymal-epithelial cell signaling involved in lung development	1	0	1	1	0.02278
BP	GO:0060584	regulation of prostaglandin-endoperoxide synthase activity	0	1	1	1	0.02278
BP	GO:0060585	positive regulation of prostaglandin-endoperoxide synthase activity	0	1	1	1	0.02278
BP	GO:0060587	regulation of lipoprotein lipid oxidation	1	0	1	1	0.02278
BP	GO:0060588	negative regulation of lipoprotein lipid oxidation	1	0	1	1	0.02278
BP	GO:0060595	fibroblast growth factor receptor signaling pathway involved in mammary gland specification	1	0	1	1	0.02278
BP	GO:0060615	mammary gland bud formation	1	0	1	1	0.02278
BP	GO:0060661	submandibular salivary gland formation	1	0	1	1	0.02278
BP	GO:0060667	branch elongation involved in salivary gland morphogenesis	1	0	1	1	0.02278
BP	GO:0060876	semicircular canal formation	1	0	1	1	0.02278
BP	GO:0060879	semicircular canal fusion	1	0	1	1	0.02278
BP	GO:0060915	mesenchymal cell differentiation involved in lung development	1	0	1	1	0.02278
BP	GO:0061011	hepatic duct development	1	0	1	1	0.02278
BP	GO:0061115	lung proximal/distal axis specification	1	0	1	1	0.02278
BP	GO:0070075	tear secretion	1	0	1	1	0.02278
BP	GO:0070346	positive regulation of fat cell proliferation	1	0	1	1	0.02278
BP	GO:0070352	positive regulation of white fat cell proliferation	1	0	1	1	0.02278
BP	GO:0070543	response to linoleic acid	1	0	1	1	0.02278
BP	GO:0071288	cellular response to mercury ion	0	1	1	1	0.02278
BP	GO:0071335	hair follicle cell proliferation	1	0	1	1	0.02278
BP	GO:0071336	regulation of hair follicle cell proliferation	1	0	1	1	0.02278
BP	GO:0071338	positive regulation of hair follicle cell proliferation	1	0	1	1	0.02278
BP	GO:0071387	cellular response to cortisol stimulus	1	0	1	1	0.02278
BP	GO:0090242	retinoic acid receptor signaling pathway involved in somitogenesis	0	1	1	1	0.02278
BP	GO:0090675	intermicrovillar adhesion	1	0	1	1	0.02278
BP	GO:0097577	sequestering of iron ion	1	0	1	1	0.02278
BP	GO:0097698	telomere maintenance via base-excision repair	0	1	1	1	0.02278
BP	GO:1900039	positive regulation of cellular response to hypoxia	0	1	1	1	0.02278
BP	GO:1901748	leukotriene D4 metabolic process	1	0	1	1	0.02278
BP	GO:1901750	leukotriene D4 biosynthetic process	1	0	1	1	0.02278
BP	GO:1902073	positive regulation of hypoxia-inducible factor-1alpha signaling pathway	0	1	1	1	0.02278
BP	GO:1902203	negative regulation of hepatocyte growth factor receptor signaling pathway	1	0	1	1	0.02278
BP	GO:1902238	regulation of intrinsic apoptotic signaling pathway in response to osmotic stress by p53 class mediator	1	0	1	1	0.02278
BP	GO:1902239	negative regulation of intrinsic apoptotic signaling pathway in response to osmotic stress by p53 class mediator	1	0	1	1	0.02278
BP	GO:1903126	negative regulation of centriole-centriole cohesion	1	0	1	1	0.02278
BP	GO:1903402	regulation of renal phosphate excretion	1	0	1	1	0.02278
BP	GO:1903403	negative regulation of renal phosphate excretion	1	0	1	1	0.02278
BP	GO:1904675	regulation of somatic stem cell division	0	1	1	1	0.02278
BP	GO:1904677	positive regulation of somatic stem cell division	0	1	1	1	0.02278
BP	GO:1905349	ciliary transition zone assembly	1	0	1	1	0.02278
BP	GO:1990127	intrinsic apoptotic signaling pathway in response to osmotic stress by p53 class mediator	1	0	1	1	0.02278
BP	GO:2000101	regulation of mammary stem cell proliferation	0	1	1	1	0.02278
BP	GO:2000103	positive regulation of mammary stem cell proliferation	0	1	1	1	0.02278
BP	GO:2000458	regulation of astrocyte chemotaxis	0	1	1	1	0.02278
BP	GO:2001112	regulation of cellular response to hepatocyte growth factor stimulus	1	0	1	1	0.02278
BP	GO:2001113	negative regulation of cellular response to hepatocyte growth factor stimulus	1	0	1	1	0.02278
BP	GO:2001213	negative regulation of vasculogenesis	1	0	1	1	0.02278
BP	GO:2001287	negative regulation of caveolin-mediated endocytosis	1	0	1	1	0.02278
BP	GO:0045071	negative regulation of viral genome replication	0	3	3	27	0.02286
CC	GO:0000221	vacuolar proton-transporting V-type ATPase, V1 domain	1	0	1	1	0.02298
CC	GO:0000308	cytoplasmic cyclin-dependent protein kinase holoenzyme complex	1	0	1	1	0.02298
CC	GO:0071914	prominosome	1	0	1	1	0.02298
CC	GO:0098576	lumenal side of membrane	0	1	1	1	0.02298
BP	GO:0009615	response to virus	1	7	8	152	0.02313
BP	GO:0015980	energy derivation by oxidation of organic compounds	6	2	8	152	0.02313
BP	GO:0051239	regulation of multicellular organismal process	32	20	52	1739	0.0235
MF	GO:0005506	iron ion binding	8	0	8	154	0.02386
BP	GO:0040011	locomotion	20	14	34	1051	0.024
BP	GO:0048731	system development	41	32	73	2578	0.02412
BP	GO:0042127	regulation of cell proliferation	14	15	29	867	0.02441
BP	GO:0071219	cellular response to molecule of bacterial origin	2	4	6	98	0.02445
MF	GO:0008271	secondary active sulfate transmembrane transporter activity	0	2	2	11	0.0245
MF	GO:0015116	sulfate transmembrane transporter activity	0	2	2	11	0.0245
BP	GO:0048729	tissue morphogenesis	11	4	15	374	0.02465
BP	GO:0055080	cation homeostasis	8	6	14	341	0.02469
MF	GO:0030276	clathrin binding	2	1	3	28	0.02471
MF	GO:0071949	FAD binding	3	0	3	28	0.02471
BP	GO:0019934	cGMP-mediated signaling	1	1	2	11	0.02484
MF	GO:0030545	receptor regulator activity	8	5	13	311	0.02495
BP	GO:0006885	regulation of pH	1	3	4	49	0.02507
BP	GO:0046785	microtubule polymerization	2	2	4	49	0.02507
BP	GO:0001937	negative regulation of endothelial cell proliferation	2	1	3	28	0.02518
BP	GO:0034605	cellular response to heat	2	1	3	28	0.02518
BP	GO:0051271	negative regulation of cellular component movement	4	5	9	184	0.0252
BP	GO:0051216	cartilage development	5	2	7	126	0.02521
BP	GO:0072522	purine-containing compound biosynthetic process	4	3	7	126	0.02521
BP	GO:0002062	chondrocyte differentiation	4	1	5	73	0.02534
BP	GO:0009124	nucleoside monophosphate biosynthetic process	3	2	5	73	0.02534
BP	GO:0045765	regulation of angiogenesis	4	5	9	185	0.02598
BP	GO:0008543	fibroblast growth factor receptor signaling pathway	2	2	4	50	0.02678
BP	GO:0071560	cellular response to transforming growth factor beta stimulus	3	4	7	128	0.02717
BP	GO:0098656	anion transmembrane transport	2	5	7	128	0.02717
BP	GO:0000003	reproduction	14	9	23	657	0.02722
BP	GO:0022414	reproductive process	14	9	23	657	0.02722
BP	GO:0070507	regulation of microtubule cytoskeleton organization	3	4	7	129	0.0282
MF	GO:0001968	fibronectin binding	1	1	2	12	0.02896
MF	GO:0004652	polynucleotide adenylyltransferase activity	2	0	2	12	0.02896
MF	GO:0030169	low-density lipoprotein particle binding	1	1	2	12	0.02896
MF	GO:0071855	neuropeptide receptor binding	1	1	2	12	0.02896
BP	GO:0032496	response to lipopolysaccharide	3	4	7	130	0.02924
BP	GO:0098771	inorganic ion homeostasis	8	6	14	349	0.0293
BP	GO:0002043	blood vessel endothelial cell proliferation involved in sprouting angiogenesis	1	1	2	12	0.02936
BP	GO:0008272	sulfate transport	0	2	2	12	0.02936
BP	GO:0098801	regulation of renal system process	1	1	2	12	0.02936
BP	GO:1903392	negative regulation of adherens junction organization	2	0	2	12	0.02936
BP	GO:1904031	positive regulation of cyclin-dependent protein kinase activity	2	0	2	12	0.02936
BP	GO:2000145	regulation of cell motility	11	9	20	556	0.02974
CC	GO:0032588	trans-Golgi network membrane	1	1	2	12	0.02983
CC	GO:0045277	respiratory chain complex IV	2	0	2	12	0.02983
BP	GO:0051707	response to other organism	6	11	17	452	0.03006
CC	GO:0005743	mitochondrial inner membrane	9	1	10	219	0.03013
BP	GO:0051480	regulation of cytosolic calcium ion concentration	4	3	7	131	0.03032
BP	GO:0071559	response to transforming growth factor beta	3	4	7	131	0.03032
BP	GO:0043207	response to external biotic stimulus	6	11	17	453	0.03061
BP	GO:0008643	carbohydrate transport	0	5	5	77	0.031
BP	GO:0006874	cellular calcium ion homeostasis	5	4	9	191	0.03103
MF	GO:0022890	inorganic cation transmembrane transporter activity	12	4	16	423	0.03139
BP	GO:0030003	cellular cation homeostasis	8	4	12	287	0.0319
BP	GO:0009888	tissue development	21	14	35	1113	0.03195
BP	GO:0048513	animal organ development	29	26	55	1891	0.03209
BP	GO:0061448	connective tissue development	6	2	8	162	0.03217
CC	GO:0044459	plasma membrane part	27	11	38	1218	0.03218
MF	GO:0033293	monocarboxylic acid binding	2	1	3	31	0.03227
BP	GO:0048525	negative regulation of viral process	1	3	4	53	0.03231
BP	GO:0098660	inorganic ion transmembrane transport	10	9	19	526	0.0324
MF	GO:0020037	heme binding	7	0	7	134	0.03259
CC	GO:0044456	synapse part	11	4	15	385	0.03279
BP	GO:0010596	negative regulation of endothelial cell migration	1	2	3	31	0.03288
BP	GO:1900181	negative regulation of protein localization to nucleus	2	1	3	31	0.03288
BP	GO:0060429	epithelium development	15	8	23	670	0.03301
MF	GO:0015645	fatty acid ligase activity	1	1	2	13	0.03373
BP	GO:0035295	tube development	7	8	15	390	0.03393
BP	GO:0002455	humoral immune response mediated by circulating immunoglobulin	2	0	2	13	0.03419
BP	GO:0007413	axonal fasciculation	2	0	2	13	0.03419
BP	GO:0009394	2'-deoxyribonucleotide metabolic process	0	2	2	13	0.03419
BP	GO:0019692	deoxyribose phosphate metabolic process	0	2	2	13	0.03419
BP	GO:0048557	embryonic digestive tract morphogenesis	1	1	2	13	0.03419
BP	GO:0071360	cellular response to exogenous dsRNA	0	2	2	13	0.03419
BP	GO:0106030	neuron projection fasciculation	2	0	2	13	0.03419
BP	GO:1900746	regulation of vascular endothelial growth factor signaling pathway	2	0	2	13	0.03419
BP	GO:0040012	regulation of locomotion	11	10	21	601	0.03451
BP	GO:0007160	cell-matrix adhesion	6	1	7	135	0.03487
BP	GO:0030334	regulation of cell migration	10	9	19	531	0.03516
BP	GO:0035924	cellular response to vascular endothelial growth factor stimulus	3	0	3	32	0.03569
BP	GO:0072376	protein activation cascade	3	0	3	32	0.03569
BP	GO:0030100	regulation of endocytosis	6	1	7	136	0.03608
BP	GO:0050801	ion homeostasis	9	6	15	395	0.03729
BP	GO:0071902	positive regulation of protein serine/threonine kinase activity	3	5	8	167	0.0375
MF	GO:0032934	sterol binding	2	1	3	33	0.03791
BP	GO:0006873	cellular ion homeostasis	8	4	12	295	0.03813
BP	GO:0050918	positive chemotaxis	2	1	3	33	0.03861
BP	GO:0001502	cartilage condensation	2	0	2	14	0.0393
BP	GO:0006144	purine nucleobase metabolic process	2	0	2	14	0.0393
BP	GO:0007205	protein kinase C-activating G-protein coupled receptor signaling pathway	1	1	2	14	0.0393
BP	GO:0098743	cell aggregation	2	0	2	14	0.0393
BP	GO:1903671	negative regulation of sprouting angiogenesis	0	2	2	14	0.0393
BP	GO:0051260	protein homooligomerization	4	4	8	169	0.03978
BP	GO:0010876	lipid localization	7	3	10	232	0.04009
MF	GO:0046872	metal ion binding	43	21	64	2296	0.0408
MF	GO:0005201	extracellular matrix structural constituent	3	0	3	34	0.0409
MF	GO:0046906	tetrapyrrole binding	7	0	7	141	0.04117
BP	GO:1904018	positive regulation of vasculature development	1	5	6	111	0.04134
BP	GO:0070098	chemokine-mediated signaling pathway	1	2	3	34	0.04166
BP	GO:0090303	positive regulation of wound healing	1	2	3	34	0.04166
BP	GO:0032101	regulation of response to external stimulus	7	9	16	436	0.04184
BP	GO:0055074	calcium ion homeostasis	5	4	9	202	0.04198
BP	GO:0009607	response to biotic stimulus	6	11	17	472	0.0425
BP	GO:0071216	cellular response to biotic stimulus	2	4	6	112	0.04288
BP	GO:0007167	enzyme linked receptor protein signaling pathway	12	7	19	544	0.04313
BP	GO:0002237	response to molecule of bacterial origin	3	4	7	142	0.0439
CC	GO:0045177	apical part of cell	4	4	8	171	0.04393
MF	GO:0000217	DNA secondary structure binding	0	2	2	15	0.04408
BP	GO:0072503	cellular divalent inorganic cation homeostasis	5	4	9	204	0.04422
BP	GO:0030194	positive regulation of blood coagulation	1	1	2	15	0.04467
BP	GO:0031664	regulation of lipopolysaccharide-mediated signaling pathway	0	2	2	15	0.04467
BP	GO:0045429	positive regulation of nitric oxide biosynthetic process	2	0	2	15	0.04467
BP	GO:0045992	negative regulation of embryonic development	1	1	2	15	0.04467
BP	GO:0061082	myeloid leukocyte cytokine production	1	1	2	15	0.04467
BP	GO:1900048	positive regulation of hemostasis	1	1	2	15	0.04467
BP	GO:1904467	regulation of tumor necrosis factor secretion	0	2	2	15	0.04467
BP	GO:2001026	regulation of endothelial cell chemotaxis	0	2	2	15	0.04467
MF	GO:0001872	(1->3)-beta-D-glucan binding	1	0	1	2	0.04471
MF	GO:0004031	aldehyde oxidase activity	1	0	1	2	0.04471
MF	GO:0004392	heme oxygenase (decyclizing) activity	1	0	1	2	0.04471
MF	GO:0004505	phenylalanine 4-monooxygenase activity	1	0	1	2	0.04471
MF	GO:0004798	thymidylate kinase activity	0	1	1	2	0.04471
MF	GO:0004947	bradykinin receptor activity	1	0	1	2	0.04471
MF	GO:0004951	cholecystokinin receptor activity	1	0	1	2	0.04471
MF	GO:0005105	type 1 fibroblast growth factor receptor binding	0	1	1	2	0.04471
MF	GO:0005153	interleukin-8 receptor binding	0	1	1	2	0.04471
MF	GO:0008107	galactoside 2-alpha-L-fucosyltransferase activity	0	1	1	2	0.04471
MF	GO:0008309	double-stranded DNA exodeoxyribonuclease activity	0	1	1	2	0.04471
MF	GO:0008413	8-oxo-7,8-dihydroguanosine triphosphate pyrophosphatase activity	0	1	1	2	0.04471
MF	GO:0008510	sodium:bicarbonate symporter activity	1	0	1	2	0.04471
MF	GO:0009041	uridylate kinase activity	0	1	1	2	0.04471
MF	GO:0015173	aromatic amino acid transmembrane transporter activity	1	0	1	2	0.04471
MF	GO:0016623	oxidoreductase activity, acting on the aldehyde or oxo group of donors, oxygen as acceptor	1	0	1	2	0.04471
MF	GO:0016890	site-specific endodeoxyribonuclease activity, specific for altered base	0	1	1	2	0.04471
MF	GO:0031127	alpha-(1,2)-fucosyltransferase activity	0	1	1	2	0.04471
MF	GO:0031702	type 1 angiotensin receptor binding	1	0	1	2	0.04471
MF	GO:0031705	bombesin receptor binding	0	1	1	2	0.04471
MF	GO:0031708	endothelin B receptor binding	0	1	1	2	0.04471
MF	GO:0033188	sphingomyelin synthase activity	1	0	1	2	0.04471
MF	GO:0035539	8-oxo-7,8-dihydrodeoxyguanosine triphosphate pyrophosphatase activity	0	1	1	2	0.04471
MF	GO:0035594	ganglioside binding	0	1	1	2	0.04471
MF	GO:0042010	interleukin-15 receptor activity	1	0	1	2	0.04471
MF	GO:0047493	ceramide cholinephosphotransferase activity	1	0	1	2	0.04471
MF	GO:0047760	butyrate-CoA ligase activity	1	0	1	2	0.04471
MF	GO:0052642	lysophosphatidic acid phosphatase activity	1	0	1	2	0.04471
MF	GO:0052851	ferric-chelate reductase (NADPH) activity	1	0	1	2	0.04471
MF	GO:0070052	collagen V binding	0	1	1	2	0.04471
MF	GO:0070538	oleic acid binding	1	0	1	2	0.04471
MF	GO:0070548	L-glutamine aminotransferase activity	1	0	1	2	0.04471
MF	GO:0070733	protein adenylyltransferase activity	1	0	1	2	0.04471
MF	GO:0072590	N-acetyl-L-aspartate-L-glutamate ligase activity	0	1	1	2	0.04471
MF	GO:0140078	class I DNA-(apurinic or apyrimidinic site) lyase activity	0	1	1	2	0.04471
MF	GO:1903981	enterobactin binding	1	0	1	2	0.04471
BP	GO:0000165	MAPK cascade	5	11	16	440	0.04481
BP	GO:0035567	non-canonical Wnt signaling pathway	3	0	3	35	0.04482
BP	GO:0001550	ovarian cumulus expansion	1	0	1	2	0.04504
BP	GO:0001878	response to yeast	1	0	1	2	0.04504
BP	GO:0002581	negative regulation of antigen processing and presentation of peptide or polysaccharide antigen via MHC class II	0	1	1	2	0.04504
BP	GO:0002605	negative regulation of dendritic cell antigen processing and presentation	0	1	1	2	0.04504
BP	GO:0003422	growth plate cartilage morphogenesis	1	0	1	2	0.04504
BP	GO:0006233	dTDP biosynthetic process	0	1	1	2	0.04504
BP	GO:0006788	heme oxidation	1	0	1	2	0.04504
BP	GO:0009139	pyrimidine nucleoside diphosphate biosynthetic process	0	1	1	2	0.04504
BP	GO:0009186	deoxyribonucleoside diphosphate metabolic process	0	1	1	2	0.04504
BP	GO:0009189	deoxyribonucleoside diphosphate biosynthetic process	0	1	1	2	0.04504
BP	GO:0009196	pyrimidine deoxyribonucleoside diphosphate metabolic process	0	1	1	2	0.04504
BP	GO:0009197	pyrimidine deoxyribonucleoside diphosphate biosynthetic process	0	1	1	2	0.04504
BP	GO:0009414	response to water deprivation	0	1	1	2	0.04504
BP	GO:0010746	regulation of plasma membrane long-chain fatty acid transport	0	1	1	2	0.04504
BP	GO:0010748	negative regulation of plasma membrane long-chain fatty acid transport	0	1	1	2	0.04504
BP	GO:0010751	negative regulation of nitric oxide mediated signal transduction	0	1	1	2	0.04504
BP	GO:0010754	negative regulation of cGMP-mediated signaling	0	1	1	2	0.04504
BP	GO:0014846	esophagus smooth muscle contraction	1	0	1	2	0.04504
BP	GO:0015688	iron chelate transport	1	0	1	2	0.04504
BP	GO:0015801	aromatic amino acid transport	1	0	1	2	0.04504
BP	GO:0015891	siderophore transport	1	0	1	2	0.04504
BP	GO:0016191	synaptic vesicle uncoating	1	0	1	2	0.04504
BP	GO:0018117	protein adenylylation	1	0	1	2	0.04504
BP	GO:0018175	protein nucleotidylation	1	0	1	2	0.04504
BP	GO:0030167	proteoglycan catabolic process	1	0	1	2	0.04504
BP	GO:0035799	ureter maturation	0	1	1	2	0.04504
BP	GO:0035815	positive regulation of renal sodium excretion	0	1	1	2	0.04504
BP	GO:0035902	response to immobilization stress	0	1	1	2	0.04504
BP	GO:0036215	response to stem cell factor	0	1	1	2	0.04504
BP	GO:0036216	cellular response to stem cell factor stimulus	0	1	1	2	0.04504
BP	GO:0038109	Kit signaling pathway	0	1	1	2	0.04504
BP	GO:0038188	cholecystokinin signaling pathway	1	0	1	2	0.04504
BP	GO:0042167	heme catabolic process	1	0	1	2	0.04504
BP	GO:0042851	L-alanine metabolic process	1	0	1	2	0.04504
BP	GO:0044336	canonical Wnt signaling pathway involved in negative regulation of apoptotic process	0	1	1	2	0.04504
BP	GO:0044866	modulation by host of viral exo-alpha-sialidase activity	1	0	1	2	0.04504
BP	GO:0044867	modulation by host of viral catalytic activity	1	0	1	2	0.04504
BP	GO:0044869	negative regulation by host of viral exo-alpha-sialidase activity	1	0	1	2	0.04504
BP	GO:0044870	modulation by host of viral glycoprotein metabolic process	1	0	1	2	0.04504
BP	GO:0044871	negative regulation by host of viral glycoprotein metabolic process	1	0	1	2	0.04504
BP	GO:0045590	negative regulation of regulatory T cell differentiation	1	0	1	2	0.04504
BP	GO:0046072	dTDP metabolic process	0	1	1	2	0.04504
BP	GO:0046110	xanthine metabolic process	1	0	1	2	0.04504
BP	GO:0046149	pigment catabolic process	1	0	1	2	0.04504
BP	GO:0046877	regulation of saliva secretion	1	0	1	2	0.04504
BP	GO:0048165	fused antrum stage	1	0	1	2	0.04504
BP	GO:0048807	female genitalia morphogenesis	1	0	1	2	0.04504
BP	GO:0050925	negative regulation of negative chemotaxis	0	1	1	2	0.04504
BP	GO:0051040	regulation of calcium-independent cell-cell adhesion	0	1	1	2	0.04504
BP	GO:0052199	negative regulation of catalytic activity in other organism involved in symbiotic interaction	1	0	1	2	0.04504
BP	GO:0052203	modulation of catalytic activity in other organism involved in symbiotic interaction	1	0	1	2	0.04504
BP	GO:0052403	negative regulation by host of symbiont catalytic activity	1	0	1	2	0.04504
BP	GO:0052422	modulation by host of symbiont catalytic activity	1	0	1	2	0.04504
BP	GO:0060024	rhythmic synaptic transmission	0	1	1	2	0.04504
BP	GO:0060168	positive regulation of adenosine receptor signaling pathway	1	0	1	2	0.04504
BP	GO:0060447	bud outgrowth involved in lung branching	1	0	1	2	0.04504
BP	GO:0060594	mammary gland specification	1	0	1	2	0.04504
BP	GO:0060648	mammary gland bud morphogenesis	1	0	1	2	0.04504
BP	GO:0060700	regulation of ribonuclease activity	0	1	1	2	0.04504
BP	GO:0061010	gall bladder development	1	0	1	2	0.04504
BP	GO:0061017	hepatoblast differentiation	1	0	1	2	0.04504
BP	GO:0061033	secretion by lung epithelial cell involved in lung growth	1	0	1	2	0.04504
BP	GO:0061051	positive regulation of cell growth involved in cardiac muscle cell development	0	1	1	2	0.04504
BP	GO:0070171	negative regulation of tooth mineralization	0	1	1	2	0.04504
BP	GO:0070343	white fat cell proliferation	1	0	1	2	0.04504
BP	GO:0070350	regulation of white fat cell proliferation	1	0	1	2	0.04504
BP	GO:0070384	Harderian gland development	1	0	1	2	0.04504
BP	GO:0070460	thyroid-stimulating hormone secretion	1	0	1	2	0.04504
BP	GO:0071462	cellular response to water stimulus	0	1	1	2	0.04504
BP	GO:0071880	adenylate cyclase-activating adrenergic receptor signaling pathway	1	0	1	2	0.04504
BP	GO:0072092	ureteric bud invasion	0	1	1	2	0.04504
BP	GO:0072564	blood microparticle formation	1	0	1	2	0.04504
BP	GO:0072718	response to cisplatin	1	0	1	2	0.04504
BP	GO:0072719	cellular response to cisplatin	1	0	1	2	0.04504
BP	GO:0099011	neuronal dense core vesicle exocytosis	1	0	1	2	0.04504
BP	GO:0099525	presynaptic dense core vesicle exocytosis	1	0	1	2	0.04504
BP	GO:1901860	positive regulation of mitochondrial DNA metabolic process	1	0	1	2	0.04504
BP	GO:1902071	regulation of hypoxia-inducible factor-1alpha signaling pathway	0	1	1	2	0.04504
BP	GO:1903015	regulation of exo-alpha-sialidase activity	1	0	1	2	0.04504
BP	GO:1903016	negative regulation of exo-alpha-sialidase activity	1	0	1	2	0.04504
BP	GO:1903719	regulation of I-kappaB phosphorylation	0	1	1	2	0.04504
BP	GO:1903721	positive regulation of I-kappaB phosphorylation	0	1	1	2	0.04504
BP	GO:1904141	positive regulation of microglial cell migration	0	1	1	2	0.04504
BP	GO:1904674	positive regulation of somatic stem cell population maintenance	0	1	1	2	0.04504
BP	GO:1905371	ceramide phosphoethanolamine metabolic process	1	0	1	2	0.04504
BP	GO:1905373	ceramide phosphoethanolamine biosynthetic process	1	0	1	2	0.04504
BP	GO:2000098	negative regulation of smooth muscle cell-matrix adhesion	1	0	1	2	0.04504
BP	GO:2000192	negative regulation of fatty acid transport	0	1	1	2	0.04504
BP	GO:2000332	regulation of blood microparticle formation	1	0	1	2	0.04504
BP	GO:2000334	positive regulation of blood microparticle formation	1	0	1	2	0.04504
BP	GO:2000866	positive regulation of estradiol secretion	0	1	1	2	0.04504
BP	GO:2001171	positive regulation of ATP biosynthetic process	1	0	1	2	0.04504
BP	GO:2001245	regulation of phosphatidylcholine biosynthetic process	1	0	1	2	0.04504
BP	GO:2001286	regulation of caveolin-mediated endocytosis	1	0	1	2	0.04504
BP	GO:0015758	glucose transport	0	4	4	59	0.04523
MF	GO:0043169	cation binding	44	21	65	2351	0.04542
CC	GO:0005610	laminin-5 complex	0	1	1	2	0.04543
CC	GO:0032783	ELL-EAF complex	0	1	1	2	0.04543
CC	GO:0044214	spanning component of plasma membrane	1	0	1	2	0.04543
CC	GO:0089717	spanning component of membrane	1	0	1	2	0.04543
CC	GO:0099059	integral component of presynaptic active zone membrane	1	0	1	2	0.04543
BP	GO:0023014	signal transduction by protein phosphorylation	5	11	16	441	0.04557
BP	GO:0015850	organic hydroxy compound transport	4	2	6	114	0.04607
CC	GO:0097458	neuron part	16	6	22	652	0.04617
BP	GO:0051093	negative regulation of developmental process	12	7	19	549	0.04652
BP	GO:0001818	negative regulation of cytokine production	4	3	7	144	0.04673
BP	GO:0032886	regulation of microtubule-based process	3	4	7	144	0.04673
BP	GO:0008284	positive regulation of cell proliferation	6	11	17	478	0.04687
MF	GO:0004175	endopeptidase activity	10	4	14	376	0.04717
BP	GO:0008645	hexose transport	0	4	4	60	0.04763
BP	GO:0010927	cellular component assembly involved in morphogenesis	3	1	4	60	0.04763
BP	GO:0008406	gonad development	2	4	6	115	0.04772
BP	GO:0001736	establishment of planar polarity	3	0	3	36	0.0481
BP	GO:0002042	cell migration involved in sprouting angiogenesis	1	2	3	36	0.0481
BP	GO:0007164	establishment of tissue polarity	3	0	3	36	0.0481
BP	GO:1903036	positive regulation of response to wounding	1	2	3	36	0.0481
BP	GO:0030198	extracellular matrix organization	6	1	7	145	0.04819
BP	GO:0032680	regulation of tumor necrosis factor production	2	3	5	87	0.04842
BP	GO:0050878	regulation of body fluid levels	4	4	8	176	0.0485
BP	GO:0051241	negative regulation of multicellular organismal process	14	8	22	662	0.04912
CC	GO:0031594	neuromuscular junction	2	1	3	36	0.04912
BP	GO:0009152	purine ribonucleotide biosynthetic process	4	2	6	116	0.0494
MF	GO:0004198	calcium-dependent cysteine-type endopeptidase activity	1	1	2	16	0.04964
CC	GO:0030054	cell junction	9	8	17	478	0.04995
BP	GO:0042306	regulation of protein import into nucleus	3	1	4	61	0.05009
BP	GO:0043535	regulation of blood vessel endothelial cell migration	1	3	4	61	0.05009
BP	GO:0044344	cellular response to fibroblast growth factor stimulus	2	2	4	61	0.05009
BP	GO:0071774	response to fibroblast growth factor	2	2	4	61	0.05009
BP	GO:0030511	positive regulation of transforming growth factor beta receptor signaling pathway	1	1	2	16	0.0503
BP	GO:0039528	cytoplasmic pattern recognition receptor signaling pathway in response to virus	0	2	2	16	0.0503
BP	GO:0045671	negative regulation of osteoclast differentiation	2	0	2	16	0.0503
BP	GO:0050820	positive regulation of coagulation	1	1	2	16	0.0503
BP	GO:0060740	prostate gland epithelium morphogenesis	2	0	2	16	0.0503
BP	GO:1901889	negative regulation of cell junction assembly	2	0	2	16	0.0503
BP	GO:1903846	positive regulation of cellular response to transforming growth factor beta stimulus	1	1	2	16	0.0503
BP	GO:1904407	positive regulation of nitric oxide metabolic process	2	0	2	16	0.0503
BP	GO:1990774	tumor necrosis factor secretion	0	2	2	16	0.0503
BP	GO:0032640	tumor necrosis factor production	2	3	5	88	0.05042
BP	GO:0048646	anatomical structure formation involved in morphogenesis	11	11	22	664	0.05046
CC	GO:0019866	organelle inner membrane	9	1	10	240	0.0508
CC	GO:0000307	cyclin-dependent protein kinase holoenzyme complex	2	0	2	16	0.05108
BP	GO:0045137	development of primary sexual characteristics	2	4	6	117	0.05112
BP	GO:0043062	extracellular structure organization	6	1	7	147	0.05119
BP	GO:0048545	response to steroid hormone	3	4	7	147	0.05119
MF	GO:0004222	metalloendopeptidase activity	4	2	6	118	0.05138
BP	GO:0007589	body fluid secretion	2	1	3	37	0.05149
BP	GO:0043536	positive regulation of blood vessel endothelial cell migration	1	2	3	37	0.05149
BP	GO:0048016	inositol phosphate-mediated signaling	2	1	3	37	0.05149
BP	GO:0090317	negative regulation of intracellular protein transport	2	1	3	37	0.05149
BP	GO:0010033	response to organic substance	22	23	45	1550	0.05196
BP	GO:0030335	positive regulation of cell migration	7	5	12	310	0.05203
BP	GO:1903555	regulation of tumor necrosis factor superfamily cytokine production	2	3	5	89	0.05247
CC	GO:0005747	mitochondrial respiratory chain complex I	3	0	3	37	0.05258
CC	GO:0030964	NADH dehydrogenase complex	3	0	3	37	0.05258
CC	GO:0045271	respiratory chain complex I	3	0	3	37	0.05258
BP	GO:0015749	monosaccharide transport	0	4	4	62	0.05263
BP	GO:0007178	transmembrane receptor protein serine/threonine kinase signaling pathway	5	4	9	211	0.05268
BP	GO:0010632	regulation of epithelial cell migration	3	4	7	149	0.05431
MF	GO:0001664	G-protein coupled receptor binding	4	2	6	120	0.05492
MF	GO:0005125	cytokine activity	3	3	6	120	0.05492
BP	GO:0030512	negative regulation of transforming growth factor beta receptor signaling pathway	1	2	3	38	0.055
BP	GO:0072583	clathrin-dependent endocytosis	3	0	3	38	0.055
BP	GO:0048870	cell motility	18	11	29	934	0.05523
BP	GO:0051674	localization of cell	18	11	29	934	0.05523
MF	GO:0005242	inward rectifier potassium channel activity	1	1	2	17	0.05544
BP	GO:0051270	regulation of cellular component movement	11	9	20	598	0.05582
BP	GO:0007020	microtubule nucleation	2	0	2	17	0.05617
BP	GO:0009262	deoxyribonucleotide metabolic process	0	2	2	17	0.05617
BP	GO:0040036	regulation of fibroblast growth factor receptor signaling pathway	1	1	2	17	0.05617
BP	GO:1902742	apoptotic process involved in development	0	2	2	17	0.05617
MF	GO:0008237	metallopeptidase activity	5	3	8	183	0.05644
MF	GO:0005319	lipid transporter activity	4	0	4	64	0.05666
MF	GO:0008201	heparin binding	3	1	4	64	0.05666
BP	GO:0030177	positive regulation of Wnt signaling pathway	5	0	5	91	0.05672
BP	GO:0071706	tumor necrosis factor superfamily cytokine production	2	3	5	91	0.05672
BP	GO:0072001	renal system development	4	4	8	182	0.0569
CC	GO:0032580	Golgi cisterna membrane	0	2	2	17	0.05704
BP	GO:0008283	cell proliferation	16	16	32	1053	0.05765
BP	GO:0030316	osteoclast differentiation	2	2	4	64	0.0579
BP	GO:0051963	regulation of synapse assembly	4	0	4	64	0.0579
BP	GO:1904589	regulation of protein import	3	1	4	64	0.0579
BP	GO:0016055	Wnt signaling pathway	9	1	10	248	0.05801
BP	GO:0048762	mesenchymal cell differentiation	3	3	6	121	0.05837
BP	GO:0050920	regulation of chemotaxis	2	4	6	121	0.05837
BP	GO:1903845	negative regulation of cellular response to transforming growth factor beta stimulus	1	2	3	39	0.05861
BP	GO:0006955	immune response	11	12	23	713	0.05883
CC	GO:0005578	proteinaceous extracellular matrix	3	1	4	64	0.05938
BP	GO:0043410	positive regulation of MAPK cascade	3	8	11	283	0.05974
BP	GO:0030154	cell differentiation	37	21	58	2090	0.06055
BP	GO:0001934	positive regulation of protein phosphorylation	7	11	18	531	0.06073
BP	GO:0031214	biomineral tissue development	3	2	5	93	0.06115
MF	GO:0071813	lipoprotein particle binding	1	1	2	18	0.06146
MF	GO:0071814	protein-lipid complex binding	1	1	2	18	0.06146
MF	GO:0004497	monooxygenase activity	5	0	5	94	0.06188
BP	GO:0198738	cell-cell signaling by wnt	9	1	10	251	0.06188
BP	GO:0072507	divalent inorganic cation homeostasis	5	4	9	218	0.06214
BP	GO:0007169	transmembrane receptor protein tyrosine kinase signaling pathway	9	4	13	354	0.06219
BP	GO:0009260	ribonucleotide biosynthetic process	4	2	6	123	0.06222
BP	GO:0006911	phagocytosis, engulfment	1	1	2	18	0.06227
BP	GO:0007157	heterophilic cell-cell adhesion via plasma membrane cell adhesion molecules	2	0	2	18	0.06227
BP	GO:0007588	excretion	1	1	2	18	0.06227
BP	GO:0032703	negative regulation of interleukin-2 production	2	0	2	18	0.06227
BP	GO:0042481	regulation of odontogenesis	1	1	2	18	0.06227
BP	GO:0071384	cellular response to corticosteroid stimulus	2	0	2	18	0.06227
BP	GO:0071385	cellular response to glucocorticoid stimulus	2	0	2	18	0.06227
BP	GO:0072523	purine-containing compound catabolic process	1	1	2	18	0.06227
BP	GO:1901099	negative regulation of signal transduction in absence of ligand	1	1	2	18	0.06227
BP	GO:2001240	negative regulation of extrinsic apoptotic signaling pathway in absence of ligand	1	1	2	18	0.06227
BP	GO:0006810	transport	48	29	77	2873	0.06232
BP	GO:0051289	protein homotetramerization	1	2	3	40	0.06234
BP	GO:1903670	regulation of sprouting angiogenesis	1	2	3	40	0.06234
BP	GO:1903825	organic acid transmembrane transport	1	2	3	40	0.06234
BP	GO:1905039	carboxylic acid transmembrane transport	1	2	3	40	0.06234
BP	GO:2000147	positive regulation of cell motility	7	5	12	320	0.06302
CC	GO:0005719	nuclear euchromatin	0	2	2	18	0.06322
BP	GO:0055082	cellular chemical homeostasis	9	4	13	355	0.0633
BP	GO:0033002	muscle cell proliferation	3	2	5	94	0.06344
BP	GO:0046390	ribose phosphate biosynthetic process	4	2	6	124	0.06419
CC	GO:0044420	extracellular matrix component	3	1	4	66	0.06505
BP	GO:0016331	morphogenesis of embryonic epithelium	4	1	5	95	0.06578
MF	GO:0002950	ceramide phosphoethanolamine synthase activity	1	0	1	3	0.06632
MF	GO:0004065	arylsulfatase activity	1	0	1	3	0.06632
MF	GO:0004340	glucokinase activity	1	0	1	3	0.06632
MF	GO:0004370	glycerol kinase activity	0	1	1	3	0.06632
MF	GO:0004668	protein-arginine deiminase activity	0	1	1	3	0.06632
MF	GO:0004999	vasoactive intestinal polypeptide receptor activity	0	1	1	3	0.06632
MF	GO:0008142	oxysterol binding	0	1	1	3	0.06632
MF	GO:0008449	N-acetylglucosamine-6-sulfatase activity	1	0	1	3	0.06632
MF	GO:0015349	thyroid hormone transmembrane transporter activity	1	0	1	3	0.06632
MF	GO:0031701	angiotensin receptor binding	1	0	1	3	0.06632
MF	GO:0031995	insulin-like growth factor II binding	1	0	1	3	0.06632
MF	GO:0036374	glutathione hydrolase activity	1	0	1	3	0.06632
MF	GO:0043208	glycosphingolipid binding	0	1	1	3	0.06632
MF	GO:0086089	voltage-gated potassium channel activity involved in atrial cardiac muscle cell action potential repolarization	0	1	1	3	0.06632
MF	GO:0090555	phosphatidylethanolamine-translocating ATPase activity	1	0	1	3	0.06632
BP	GO:0055067	monovalent inorganic cation homeostasis	1	3	4	67	0.06632
BP	GO:0048878	chemical homeostasis	11	8	19	574	0.06638
BP	GO:0006812	cation transport	16	7	23	723	0.06646
BP	GO:0002175	protein localization to paranode region of axon	1	0	1	3	0.0668
BP	GO:0002322	B cell proliferation involved in immune response	0	1	1	3	0.0668
BP	GO:0002568	somatic diversification of T cell receptor genes	0	1	1	3	0.0668
BP	GO:0002580	regulation of antigen processing and presentation of peptide or polysaccharide antigen via MHC class II	0	1	1	3	0.0668
BP	GO:0002681	somatic recombination of T cell receptor gene segments	0	1	1	3	0.0668
BP	GO:0006145	purine nucleobase catabolic process	1	0	1	3	0.0668
BP	GO:0006203	dGTP catabolic process	0	1	1	3	0.0668
BP	GO:0006522	alanine metabolic process	1	0	1	3	0.0668
BP	GO:0006686	sphingomyelin biosynthetic process	1	0	1	3	0.0668
BP	GO:0006710	androgen catabolic process	0	1	1	3	0.0668
BP	GO:0006772	thiamine metabolic process	1	0	1	3	0.0668
BP	GO:0006787	porphyrin-containing compound catabolic process	1	0	1	3	0.0668
BP	GO:0008228	opsonization	1	0	1	3	0.0668
BP	GO:0009078	pyruvate family amino acid metabolic process	1	0	1	3	0.0668
BP	GO:0009138	pyrimidine nucleoside diphosphate metabolic process	0	1	1	3	0.0668
BP	GO:0009946	proximal/distal axis specification	1	0	1	3	0.0668
BP	GO:0014004	microglia differentiation	1	0	1	3	0.0668
BP	GO:0014005	microglia development	1	0	1	3	0.0668
BP	GO:0014826	vein smooth muscle contraction	0	1	1	3	0.0668
BP	GO:0015911	plasma membrane long-chain fatty acid transport	0	1	1	3	0.0668
BP	GO:0018101	protein citrullination	0	1	1	3	0.0668
BP	GO:0030913	paranodal junction assembly	1	0	1	3	0.0668
BP	GO:0030997	regulation of centriole-centriole cohesion	1	0	1	3	0.0668
BP	GO:0031581	hemidesmosome assembly	1	0	1	3	0.0668
BP	GO:0032020	ISG15-protein conjugation	0	1	1	3	0.0668
BP	GO:0033015	tetrapyrrole catabolic process	1	0	1	3	0.0668
BP	GO:0033153	T cell receptor V(D)J recombination	0	1	1	3	0.0668
BP	GO:0033504	floor plate development	1	0	1	3	0.0668
BP	GO:0034080	CENP-A containing nucleosome assembly	0	1	1	3	0.0668
BP	GO:0034196	acylglycerol transport	1	0	1	3	0.0668
BP	GO:0034197	triglyceride transport	1	0	1	3	0.0668
BP	GO:0034442	regulation of lipoprotein oxidation	1	0	1	3	0.0668
BP	GO:0034443	negative regulation of lipoprotein oxidation	1	0	1	3	0.0668
BP	GO:0035519	protein K29-linked ubiquitination	1	0	1	3	0.0668
BP	GO:0035582	sequestering of BMP in extracellular matrix	1	0	1	3	0.0668
BP	GO:0035813	regulation of renal sodium excretion	0	1	1	3	0.0668
BP	GO:0035938	estradiol secretion	0	1	1	3	0.0668
BP	GO:0035977	protein deglycosylation involved in glycoprotein catabolic process	1	0	1	3	0.0668
BP	GO:0036507	protein demannosylation	1	0	1	3	0.0668
BP	GO:0036508	protein alpha-1,2-demannosylation	1	0	1	3	0.0668
BP	GO:0042262	DNA protection	0	1	1	3	0.0668
BP	GO:0042483	negative regulation of odontogenesis	0	1	1	3	0.0668
BP	GO:0042723	thiamine-containing compound metabolic process	1	0	1	3	0.0668
BP	GO:0042737	drug catabolic process	0	1	1	3	0.0668
BP	GO:0042738	exogenous drug catabolic process	0	1	1	3	0.0668
BP	GO:0042904	9-cis-retinoic acid biosynthetic process	0	1	1	3	0.0668
BP	GO:0042905	9-cis-retinoic acid metabolic process	0	1	1	3	0.0668
BP	GO:0043652	engulfment of apoptotic cell	0	1	1	3	0.0668
BP	GO:0044362	negative regulation of molecular function in other organism	1	0	1	3	0.0668
BP	GO:0044868	modulation by host of viral molecular function	1	0	1	3	0.0668
BP	GO:0046085	adenosine metabolic process	1	0	1	3	0.0668
BP	GO:0048550	negative regulation of pinocytosis	1	0	1	3	0.0668
BP	GO:0051418	microtubule nucleation by microtubule organizing center	1	0	1	3	0.0668
BP	GO:0052204	negative regulation of molecular function in other organism involved in symbiotic interaction	1	0	1	3	0.0668
BP	GO:0052405	negative regulation by host of symbiont molecular function	1	0	1	3	0.0668
BP	GO:0055095	lipoprotein particle mediated signaling	1	0	1	3	0.0668
BP	GO:0055096	low-density lipoprotein particle mediated signaling	1	0	1	3	0.0668
BP	GO:0060167	regulation of adenosine receptor signaling pathway	1	0	1	3	0.0668
BP	GO:0060298	positive regulation of sarcomere organization	0	1	1	3	0.0668
BP	GO:0060435	bronchiole development	1	0	1	3	0.0668
BP	GO:0060437	lung growth	1	0	1	3	0.0668
BP	GO:0060510	Type II pneumocyte differentiation	1	0	1	3	0.0668
BP	GO:0060686	negative regulation of prostatic bud formation	1	0	1	3	0.0668
BP	GO:0060907	positive regulation of macrophage cytokine production	1	0	1	3	0.0668
BP	GO:0061050	regulation of cell growth involved in cardiac muscle cell development	0	1	1	3	0.0668
BP	GO:0061641	CENP-A containing chromatin organization	0	1	1	3	0.0668
BP	GO:0070172	positive regulation of tooth mineralization	1	0	1	3	0.0668
BP	GO:0071420	cellular response to histamine	0	1	1	3	0.0668
BP	GO:0071638	negative regulation of monocyte chemotactic protein-1 production	1	0	1	3	0.0668
BP	GO:0072093	metanephric renal vesicle formation	0	1	1	3	0.0668
BP	GO:0097466	ubiquitin-dependent glycoprotein ERAD pathway	1	0	1	3	0.0668
BP	GO:0098914	membrane repolarization during atrial cardiac muscle cell action potential	0	1	1	3	0.0668
BP	GO:1900245	positive regulation of MDA-5 signaling pathway	0	1	1	3	0.0668
BP	GO:1901509	regulation of endothelial tube morphogenesis	1	0	1	3	0.0668
BP	GO:1902001	fatty acid transmembrane transport	0	1	1	3	0.0668
BP	GO:1903977	positive regulation of glial cell migration	0	1	1	3	0.0668
BP	GO:1904124	microglial cell migration	0	1	1	3	0.0668
BP	GO:1904139	regulation of microglial cell migration	0	1	1	3	0.0668
BP	GO:1904382	mannose trimming involved in glycoprotein ERAD pathway	1	0	1	3	0.0668
BP	GO:1904587	response to glycoprotein	1	0	1	3	0.0668
BP	GO:1904672	regulation of somatic stem cell population maintenance	0	1	1	3	0.0668
BP	GO:1904849	positive regulation of cell chemotaxis to fibroblast growth factor	0	1	1	3	0.0668
BP	GO:1904891	positive regulation of excitatory synapse assembly	1	0	1	3	0.0668
BP	GO:1905065	positive regulation of vascular smooth muscle cell differentiation	0	1	1	3	0.0668
BP	GO:1990034	calcium ion export across plasma membrane	0	1	1	3	0.0668
BP	GO:2000097	regulation of smooth muscle cell-matrix adhesion	1	0	1	3	0.0668
BP	GO:2000312	regulation of kainate selective glutamate receptor activity	0	1	1	3	0.0668
BP	GO:2000370	positive regulation of clathrin-dependent endocytosis	1	0	1	3	0.0668
BP	GO:2000405	negative regulation of T cell migration	1	0	1	3	0.0668
BP	GO:2000546	positive regulation of endothelial cell chemotaxis to fibroblast growth factor	0	1	1	3	0.0668
BP	GO:2000864	regulation of estradiol secretion	0	1	1	3	0.0668
BP	GO:2001013	epithelial cell proliferation involved in renal tubule morphogenesis	1	0	1	3	0.0668
BP	GO:2001027	negative regulation of endothelial cell chemotaxis	0	1	1	3	0.0668
CC	GO:0005827	polar microtubule	1	0	1	3	0.06736
CC	GO:0031528	microvillus membrane	1	0	1	3	0.06736
CC	GO:0033162	melanosome membrane	1	0	1	3	0.06736
CC	GO:0036157	outer dynein arm	0	1	1	3	0.06736
CC	GO:0045009	chitosome	1	0	1	3	0.06736
CC	GO:0090741	pigment granule membrane	1	0	1	3	0.06736
CC	GO:0005581	collagen trimer	2	1	3	41	0.06753
MF	GO:0030215	semaphorin receptor binding	1	1	2	19	0.0677
BP	GO:0051272	positive regulation of cellular component movement	7	5	12	324	0.06781
BP	GO:1900180	regulation of protein localization to nucleus	3	2	5	96	0.06817
BP	GO:0050793	regulation of developmental process	27	15	42	1463	0.06835
BP	GO:0008038	neuron recognition	2	0	2	19	0.06858
BP	GO:0008535	respiratory chain complex IV assembly	2	0	2	19	0.06858
BP	GO:0030878	thyroid gland development	2	0	2	19	0.06858
BP	GO:0043277	apoptotic cell clearance	1	1	2	19	0.06858
BP	GO:0060384	innervation	1	1	2	19	0.06858
BP	GO:1903428	positive regulation of reactive oxygen species biosynthetic process	2	0	2	19	0.06858
CC	GO:0031966	mitochondrial membrane	11	1	12	322	0.06869
MF	GO:0015171	amino acid transmembrane transporter activity	2	1	3	42	0.0689
BP	GO:0046660	female sex differentiation	2	2	4	68	0.06926
CC	GO:0042470	melanosome	1	1	2	19	0.06961
CC	GO:0048770	pigment granule	1	1	2	19	0.06961
BP	GO:0022602	ovulation cycle process	1	2	3	42	0.07011
BP	GO:0038034	signal transduction in absence of ligand	2	1	3	42	0.07011
BP	GO:0097192	extrinsic apoptotic signaling pathway in absence of ligand	2	1	3	42	0.07011
BP	GO:0009966	regulation of signal transduction	23	25	48	1706	0.07023
CC	GO:0045202	synapse	15	4	19	574	0.07079
BP	GO:0048871	multicellular organismal homeostasis	5	3	8	191	0.07114
BP	GO:0043408	regulation of MAPK cascade	4	10	14	398	0.07196
BP	GO:0007188	adenylate cyclase-modulating G-protein coupled receptor signaling pathway	3	2	5	98	0.07309
MF	GO:0005539	glycosaminoglycan binding	4	1	5	99	0.0738
CC	GO:1990204	oxidoreductase complex	4	0	4	69	0.07406
MF	GO:0005104	fibroblast growth factor receptor binding	1	1	2	20	0.07413
MF	GO:1901682	sulfur compound transmembrane transporter activity	0	2	2	20	0.07413
BP	GO:0007184	SMAD protein import into nucleus	1	1	2	20	0.07508
BP	GO:0010611	regulation of cardiac muscle hypertrophy	1	1	2	20	0.07508
BP	GO:0010837	regulation of keratinocyte proliferation	2	0	2	20	0.07508
BP	GO:0014743	regulation of muscle hypertrophy	1	1	2	20	0.07508
BP	GO:0035767	endothelial cell chemotaxis	0	2	2	20	0.07508
BP	GO:0043537	negative regulation of blood vessel endothelial cell migration	0	2	2	20	0.07508
BP	GO:0060390	regulation of SMAD protein import into nucleus	1	1	2	20	0.07508
BP	GO:0060441	epithelial tube branching involved in lung morphogenesis	2	0	2	20	0.07508
BP	GO:0022607	cellular component assembly	31	15	46	1635	0.07552
BP	GO:0007416	synapse assembly	4	1	5	99	0.07561
CC	GO:0000791	euchromatin	0	2	2	20	0.07621
BP	GO:0098662	inorganic cation transmembrane transport	10	6	16	474	0.07624
BP	GO:0014070	response to organic cyclic compound	5	8	13	366	0.07631
BP	GO:0002573	myeloid leukocyte differentiation	4	2	6	130	0.07682
BP	GO:0051965	positive regulation of synapse assembly	3	0	3	44	0.07829
BP	GO:0001823	mesonephros development	2	2	4	71	0.07848
BP	GO:0001952	regulation of cell-matrix adhesion	3	1	4	71	0.07848
BP	GO:1901136	carbohydrate derivative catabolic process	2	2	4	71	0.07848
BP	GO:0016477	cell migration	16	10	26	852	0.07866
BP	GO:0031347	regulation of defense response	7	5	12	333	0.07945
MF	GO:0005520	insulin-like growth factor binding	1	1	2	21	0.08074
MF	GO:0017046	peptide hormone binding	2	0	2	21	0.08074
BP	GO:0007187	G-protein coupled receptor signaling pathway, coupled to cyclic nucleotide second messenger	3	2	5	101	0.08081
MF	GO:0042379	chemokine receptor binding	2	1	3	45	0.08113
BP	GO:0001944	vasculature development	6	9	15	442	0.08128
BP	GO:0090101	negative regulation of transmembrane receptor protein serine/threonine kinase signaling pathway	1	3	4	72	0.08169
BP	GO:0003338	metanephros morphogenesis	1	1	2	21	0.08178
BP	GO:0021846	cell proliferation in forebrain	2	0	2	21	0.08178
BP	GO:0071353	cellular response to interleukin-4	1	1	2	21	0.08178
BP	GO:0097009	energy homeostasis	2	0	2	21	0.08178
BP	GO:0042327	positive regulation of phosphorylation	7	11	18	554	0.08312
BP	GO:0045766	positive regulation of angiogenesis	1	4	5	102	0.08348
BP	GO:0030336	negative regulation of cell migration	3	4	7	165	0.08348
BP	GO:0040017	positive regulation of locomotion	7	5	12	336	0.0836
CC	GO:0099240	intrinsic component of synaptic membrane	4	0	4	72	0.08368
MF	GO:0061134	peptidase regulator activity	5	1	6	134	0.08369
BP	GO:0009968	negative regulation of signal transduction	12	10	22	705	0.08379
MF	GO:0051536	iron-sulfur cluster binding	2	1	3	46	0.08541
MF	GO:0051540	metal cluster binding	2	1	3	46	0.08541
BP	GO:0032103	positive regulation of response to external stimulus	2	5	7	166	0.08556
CC	GO:0000786	nucleosome	0	5	5	102	0.08583
BP	GO:0045444	fat cell differentiation	3	3	6	134	0.08596
BP	GO:0019725	cellular homeostasis	10	5	15	446	0.08614
BP	GO:0007179	transforming growth factor beta receptor signaling pathway	2	3	5	103	0.0862
BP	GO:0051234	establishment of localization	48	30	78	2968	0.08656
BP	GO:0001738	morphogenesis of a polarized epithelium	3	0	3	46	0.08687
BP	GO:0006879	cellular iron ion homeostasis	3	0	3	46	0.08687
BP	GO:0042698	ovulation cycle	1	2	3	46	0.08687
BP	GO:0045670	regulation of osteoclast differentiation	2	1	3	46	0.08687
BP	GO:0048864	stem cell development	1	2	3	46	0.08687
BP	GO:0072358	cardiovascular system development	6	9	15	447	0.08738
MF	GO:0004012	phospholipid-translocating ATPase activity	1	0	1	4	0.08743
MF	GO:0004127	cytidylate kinase activity	0	1	1	4	0.08743
MF	GO:0015125	bile acid transmembrane transporter activity	1	0	1	4	0.08743
MF	GO:0016715	oxidoreductase activity, acting on paired donors, with incorporation or reduction of molecular oxygen, reduced ascorbate as one donor, and incorporation of one atom of oxygen	1	0	1	4	0.08743
MF	GO:0034597	phosphatidylinositol-4,5-bisphosphate 4-phosphatase activity	1	0	1	4	0.08743
MF	GO:0035615	clathrin adaptor activity	1	0	1	4	0.08743
MF	GO:0042289	MHC class II protein binding	1	0	1	4	0.08743
MF	GO:0042609	CD4 receptor binding	1	0	1	4	0.08743
MF	GO:0046790	virion binding	1	0	1	4	0.08743
MF	GO:0048495	Roundabout binding	0	1	1	4	0.08743
MF	GO:0070122	isopeptidase activity	1	0	1	4	0.08743
MF	GO:0098748	endocytic adaptor activity	1	0	1	4	0.08743
MF	GO:1904121	phosphatidylethanolamine transporter activity	1	0	1	4	0.08743
MF	GO:0005160	transforming growth factor beta receptor binding	0	2	2	22	0.08754
BP	GO:0001957	intramembranous ossification	0	1	1	4	0.08806
BP	GO:0002551	mast cell chemotaxis	0	1	1	4	0.08806
BP	GO:0003100	regulation of systemic arterial blood pressure by endothelin	0	1	1	4	0.08806
BP	GO:0003298	physiological muscle hypertrophy	0	1	1	4	0.08806
BP	GO:0003301	physiological cardiac muscle hypertrophy	0	1	1	4	0.08806
BP	GO:0006558	L-phenylalanine metabolic process	1	0	1	4	0.08806
BP	GO:0006559	L-phenylalanine catabolic process	1	0	1	4	0.08806
BP	GO:0009155	purine deoxyribonucleotide catabolic process	0	1	1	4	0.08806
BP	GO:0009217	purine deoxyribonucleoside triphosphate catabolic process	0	1	1	4	0.08806
BP	GO:0009415	response to water	0	1	1	4	0.08806
BP	GO:0010752	regulation of cGMP-mediated signaling	0	1	1	4	0.08806
BP	GO:0010757	negative regulation of plasminogen activation	0	1	1	4	0.08806
BP	GO:0014820	tonic smooth muscle contraction	0	1	1	4	0.08806
BP	GO:0014824	artery smooth muscle contraction	0	1	1	4	0.08806
BP	GO:0014831	gastro-intestinal system smooth muscle contraction	1	0	1	4	0.08806
BP	GO:0019062	virion attachment to host cell	1	0	1	4	0.08806
BP	GO:0022027	interkinetic nuclear migration	1	0	1	4	0.08806
BP	GO:0022605	oogenesis stage	1	0	1	4	0.08806
BP	GO:0030916	otic vesicle formation	1	0	1	4	0.08806
BP	GO:0032532	regulation of microvillus length	1	0	1	4	0.08806
BP	GO:0032762	mast cell cytokine production	0	1	1	4	0.08806
BP	GO:0032782	bile acid secretion	1	0	1	4	0.08806
BP	GO:0035583	sequestering of TGFbeta in extracellular matrix	1	0	1	4	0.08806
BP	GO:0035634	response to stilbenoid	1	0	1	4	0.08806
BP	GO:0035723	interleukin-15-mediated signaling pathway	1	0	1	4	0.08806
BP	GO:0035860	glial cell-derived neurotrophic factor receptor signaling pathway	1	0	1	4	0.08806
BP	GO:0036022	limb joint morphogenesis	1	0	1	4	0.08806
BP	GO:0036072	direct ossification	0	1	1	4	0.08806
BP	GO:0036515	serotonergic neuron axon guidance	1	0	1	4	0.08806
BP	GO:0042160	lipoprotein modification	1	0	1	4	0.08806
BP	GO:0042161	lipoprotein oxidation	1	0	1	4	0.08806
BP	GO:0044359	modulation of molecular function in other organism	1	0	1	4	0.08806
BP	GO:0046070	dGTP metabolic process	0	1	1	4	0.08806
BP	GO:0046541	saliva secretion	1	0	1	4	0.08806
BP	GO:0046689	response to mercury ion	0	1	1	4	0.08806
BP	GO:0048050	post-embryonic eye morphogenesis	1	0	1	4	0.08806
BP	GO:0048808	male genitalia morphogenesis	1	0	1	4	0.08806
BP	GO:0050915	sensory perception of sour taste	1	0	1	4	0.08806
BP	GO:0050923	regulation of negative chemotaxis	0	1	1	4	0.08806
BP	GO:0051767	nitric-oxide synthase biosynthetic process	0	1	1	4	0.08806
BP	GO:0051769	regulation of nitric-oxide synthase biosynthetic process	0	1	1	4	0.08806
BP	GO:0051918	negative regulation of fibrinolysis	0	1	1	4	0.08806
BP	GO:0052205	modulation of molecular function in other organism involved in symbiotic interaction	1	0	1	4	0.08806
BP	GO:0052428	modulation by host of symbiont molecular function	1	0	1	4	0.08806
BP	GO:0060392	negative regulation of SMAD protein import into nucleus	0	1	1	4	0.08806
BP	GO:0060430	lung saccule development	1	0	1	4	0.08806
BP	GO:0060592	mammary gland formation	1	0	1	4	0.08806
BP	GO:0060664	epithelial cell proliferation involved in salivary gland morphogenesis	1	0	1	4	0.08806
BP	GO:0060665	regulation of branching involved in salivary gland morphogenesis by mesenchymal-epithelial signaling	1	0	1	4	0.08806
BP	GO:0060684	epithelial-mesenchymal cell signaling	1	0	1	4	0.08806
BP	GO:0061009	common bile duct development	1	0	1	4	0.08806
BP	GO:0061049	cell growth involved in cardiac muscle cell development	0	1	1	4	0.08806
BP	GO:0061470	T follicular helper cell differentiation	0	1	1	4	0.08806
BP	GO:0070341	fat cell proliferation	1	0	1	4	0.08806
BP	GO:0070344	regulation of fat cell proliferation	1	0	1	4	0.08806
BP	GO:0071205	protein localization to juxtaparanode region of axon	1	0	1	4	0.08806
BP	GO:0071281	cellular response to iron ion	1	0	1	4	0.08806
BP	GO:0071350	cellular response to interleukin-15	1	0	1	4	0.08806
BP	GO:0071394	cellular response to testosterone stimulus	0	1	1	4	0.08806
BP	GO:0071724	response to diacyl bacterial lipopeptide	1	0	1	4	0.08806
BP	GO:0071726	cellular response to diacyl bacterial lipopeptide	1	0	1	4	0.08806
BP	GO:0072318	clathrin coat disassembly	1	0	1	4	0.08806
BP	GO:0072319	vesicle uncoating	1	0	1	4	0.08806
BP	GO:0090598	male anatomical structure morphogenesis	1	0	1	4	0.08806
BP	GO:0099509	regulation of presynaptic cytosolic calcium ion concentration	1	0	1	4	0.08806
BP	GO:0099558	maintenance of synapse structure	1	0	1	4	0.08806
BP	GO:0140052	cellular response to oxidised low-density lipoprotein particle stimulus	1	0	1	4	0.08806
BP	GO:1900227	positive regulation of NLRP3 inflammasome complex assembly	1	0	1	4	0.08806
BP	GO:1901621	negative regulation of smoothened signaling pathway involved in dorsal/ventral neural tube patterning	0	1	1	4	0.08806
BP	GO:1901660	calcium ion export	0	1	1	4	0.08806
BP	GO:1901841	regulation of high voltage-gated calcium channel activity	1	0	1	4	0.08806
BP	GO:1901842	negative regulation of high voltage-gated calcium channel activity	1	0	1	4	0.08806
BP	GO:1902202	regulation of hepatocyte growth factor receptor signaling pathway	1	0	1	4	0.08806
BP	GO:1902218	regulation of intrinsic apoptotic signaling pathway in response to osmotic stress	1	0	1	4	0.08806
BP	GO:1902219	negative regulation of intrinsic apoptotic signaling pathway in response to osmotic stress	1	0	1	4	0.08806
BP	GO:1902221	erythrose 4-phosphate/phosphoenolpyruvate family amino acid metabolic process	1	0	1	4	0.08806
BP	GO:1902222	erythrose 4-phosphate/phosphoenolpyruvate family amino acid catabolic process	1	0	1	4	0.08806
BP	GO:1902857	positive regulation of non-motile cilium assembly	0	1	1	4	0.08806
BP	GO:1903588	negative regulation of blood vessel endothelial cell proliferation involved in sprouting angiogenesis	0	1	1	4	0.08806
BP	GO:1903724	positive regulation of centriole elongation	0	1	1	4	0.08806
BP	GO:1904970	brush border assembly	1	0	1	4	0.08806
BP	GO:1990504	dense core granule exocytosis	1	0	1	4	0.08806
BP	GO:2000035	regulation of stem cell division	0	1	1	4	0.08806
BP	GO:2001205	negative regulation of osteoclast development	1	0	1	4	0.08806
BP	GO:0019935	cyclic-nucleotide-mediated signaling	2	2	4	74	0.08828
CC	GO:0005795	Golgi stack	1	2	3	46	0.08859
CC	GO:0098800	inner mitochondrial membrane protein complex	5	0	5	103	0.08861
BP	GO:0002063	chondrocyte development	1	1	2	22	0.08865
BP	GO:0014003	oligodendrocyte development	2	0	2	22	0.08865
BP	GO:0043044	ATP-dependent chromatin remodeling	0	2	2	22	0.08865
BP	GO:0045428	regulation of nitric oxide biosynthetic process	2	0	2	22	0.08865
BP	GO:0070670	response to interleukin-4	1	1	2	22	0.08865
BP	GO:0070884	regulation of calcineurin-NFAT signaling cascade	2	0	2	22	0.08865
BP	GO:0106056	regulation of calcineurin-mediated signaling	2	0	2	22	0.08865
BP	GO:0071495	cellular response to endogenous stimulus	10	11	21	672	0.08868
CC	GO:0030056	hemidesmosome	1	0	1	4	0.0888
CC	GO:0032585	multivesicular body membrane	0	1	1	4	0.0888
CC	GO:0071546	pi-body	0	1	1	4	0.0888
CC	GO:0097427	microtubule bundle	1	0	1	4	0.0888
CC	GO:0099025	anchored component of postsynaptic membrane	1	0	1	4	0.0888
CC	GO:1902711	GABA-A receptor complex	0	1	1	4	0.0888
CC	GO:0005911	cell-cell junction	6	4	10	267	0.08895
CC	GO:0043209	myelin sheath	2	0	2	22	0.08995
BP	GO:0019058	viral life cycle	2	4	6	136	0.09075
BP	GO:0048732	gland development	6	3	9	236	0.09119
BP	GO:0006029	proteoglycan metabolic process	3	0	3	47	0.0913
BP	GO:1902117	positive regulation of organelle assembly	1	2	3	47	0.0913
BP	GO:0010562	positive regulation of phosphorus metabolic process	8	11	19	599	0.09142
BP	GO:0045937	positive regulation of phosphate metabolic process	8	11	19	599	0.09142
BP	GO:0072359	circulatory system development	7	13	20	637	0.09171
BP	GO:0010594	regulation of endothelial cell migration	2	3	5	105	0.09176
BP	GO:0007389	pattern specification process	6	4	10	271	0.09185
BP	GO:0010646	regulation of cell communication	26	26	52	1905	0.09232
CC	GO:0005886	plasma membrane	54	26	80	3039	0.09282
BP	GO:0001932	regulation of protein phosphorylation	10	14	24	791	0.09301
CC	GO:0005903	brush border	2	1	3	47	0.0931
MF	GO:0016849	phosphorus-oxygen lyase activity	2	0	2	23	0.09449
BP	GO:2001236	regulation of extrinsic apoptotic signaling pathway	2	3	5	106	0.09461
BP	GO:0043534	blood vessel endothelial cell migration	1	3	4	76	0.09513
BP	GO:0006956	complement activation	2	0	2	23	0.09568
BP	GO:0031076	embryonic camera-type eye development	1	1	2	23	0.09568
BP	GO:0031122	cytoplasmic microtubule organization	2	0	2	23	0.09568
BP	GO:0050919	negative chemotaxis	0	2	2	23	0.09568
BP	GO:0010717	regulation of epithelial to mesenchymal transition	2	1	3	48	0.09583
BP	GO:0016239	positive regulation of macroautophagy	3	0	3	48	0.09583
BP	GO:0048645	animal organ formation	3	0	3	48	0.09583
BP	GO:1901654	response to ketone	1	2	3	48	0.09583
BP	GO:0006928	movement of cell or subcellular component	18	16	34	1186	0.09634
BP	GO:1905114	cell surface receptor signaling pathway involved in cell-cell signaling	9	2	11	309	0.09643
BP	GO:0006461	protein complex assembly	13	9	22	719	0.09794
BP	GO:0009719	response to endogenous stimulus	10	12	22	719	0.09794
BP	GO:0070271	protein complex biogenesis	13	9	22	719	0.09794
MF	GO:1901681	sulfur compound binding	4	1	5	108	0.09814
BP	GO:0010466	negative regulation of peptidase activity	4	2	6	139	0.0982
MF	GO:0005496	steroid binding	2	1	3	49	0.09878
BP	GO:0034097	response to cytokine	5	10	15	456	0.09907
BP	GO:0001568	blood vessel development	6	8	14	420	0.10024
BP	GO:0009408	response to heat	2	1	3	49	0.10044
BP	GO:0031016	pancreas development	2	1	3	49	0.10044
BP	GO:0033143	regulation of intracellular steroid hormone receptor signaling pathway	1	2	3	49	0.10044
BP	GO:0050909	sensory perception of taste	2	1	3	49	0.10044
BP	GO:0070374	positive regulation of ERK1 and ERK2 cascade	2	3	5	108	0.10045
CC	GO:0098862	cluster of actin-based cell projections	3	1	4	77	0.10098
BP	GO:0022412	cellular process involved in reproduction in multicellular organism	5	3	8	207	0.10136
MF	GO:0001786	phosphatidylserine binding	1	1	2	24	0.1016
BP	GO:0009112	nucleobase metabolic process	2	0	2	24	0.10287
BP	GO:0038084	vascular endothelial growth factor signaling pathway	2	0	2	24	0.10287
BP	GO:0046456	icosanoid biosynthetic process	1	1	2	24	0.10287
BP	GO:0099024	plasma membrane invagination	1	1	2	24	0.10287
BP	GO:0023051	regulation of signaling	26	26	52	1921	0.10296
MF	GO:0030170	pyridoxal phosphate binding	2	1	3	50	0.10342
MF	GO:0070279	vitamin B6 binding	2	1	3	50	0.10342
MF	GO:0015103	inorganic anion transmembrane transporter activity	1	3	4	79	0.10375
BP	GO:0051259	protein oligomerization	5	4	9	243	0.10434
CC	GO:0055037	recycling endosome	1	3	4	78	0.10462
BP	GO:0032760	positive regulation of tumor necrosis factor production	1	2	3	50	0.10514
BP	GO:0007269	neurotransmitter secretion	2	2	4	79	0.10585
BP	GO:0045807	positive regulation of endocytosis	3	1	4	79	0.10585
BP	GO:0048565	digestive tract development	2	2	4	79	0.10585
BP	GO:0099643	signal release from synapse	2	2	4	79	0.10585
MF	GO:0008324	cation transmembrane transporter activity	12	4	16	502	0.10611
CC	GO:0044815	DNA packaging complex	0	5	5	109	0.10625
CC	GO:0005604	basement membrane	2	1	3	50	0.10718
MF	GO:0001758	retinal dehydrogenase activity	0	1	1	5	0.10807
MF	GO:0001849	complement component C1q binding	1	0	1	5	0.10807
MF	GO:0003993	acid phosphatase activity	1	0	1	5	0.10807
MF	GO:0004396	hexokinase activity	1	0	1	5	0.10807
MF	GO:0008035	high-density lipoprotein particle binding	1	0	1	5	0.10807
MF	GO:0008121	ubiquinol-cytochrome-c reductase activity	1	0	1	5	0.10807
MF	GO:0015129	lactate transmembrane transporter activity	1	0	1	5	0.10807
MF	GO:0015168	glycerol transmembrane transporter activity	0	1	1	5	0.10807
MF	GO:0016308	1-phosphatidylinositol-4-phosphate 5-kinase activity	1	0	1	5	0.10807
MF	GO:0016679	oxidoreductase activity, acting on diphenols and related substances as donors	1	0	1	5	0.10807
MF	GO:0016681	oxidoreductase activity, acting on diphenols and related substances as donors, cytochrome as acceptor	1	0	1	5	0.10807
MF	GO:0016714	oxidoreductase activity, acting on paired donors, with incorporation or reduction of molecular oxygen, reduced pteridine as one donor, and incorporation of one atom of oxygen	1	0	1	5	0.10807
MF	GO:0030676	Rac guanyl-nucleotide exchange factor activity	1	0	1	5	0.10807
BP	GO:0002138	retinoic acid biosynthetic process	0	1	1	5	0.10884
BP	GO:0002578	negative regulation of antigen processing and presentation	0	1	1	5	0.10884
BP	GO:0006751	glutathione catabolic process	1	0	1	5	0.10884
BP	GO:0007442	hindgut morphogenesis	0	1	1	5	0.10884
BP	GO:0009146	purine nucleoside triphosphate catabolic process	0	1	1	5	0.10884
BP	GO:0009221	pyrimidine deoxyribonucleotide biosynthetic process	0	1	1	5	0.10884
BP	GO:0010886	positive regulation of cholesterol storage	1	0	1	5	0.10884
BP	GO:0015727	lactate transport	1	0	1	5	0.10884
BP	GO:0016102	diterpenoid biosynthetic process	0	1	1	5	0.10884
BP	GO:0018230	peptidyl-L-cysteine S-palmitoylation	0	1	1	5	0.10884
BP	GO:0018231	peptidyl-S-diacylglycerol-L-cysteine biosynthetic process from peptidyl-cysteine	0	1	1	5	0.10884
BP	GO:0032026	response to magnesium ion	0	1	1	5	0.10884
BP	GO:0032493	response to bacterial lipoprotein	1	0	1	5	0.10884
BP	GO:0032808	lacrimal gland development	1	0	1	5	0.10884
BP	GO:0032891	negative regulation of organic acid transport	0	1	1	5	0.10884
BP	GO:0032914	positive regulation of transforming growth factor beta1 production	0	1	1	5	0.10884
BP	GO:0033574	response to testosterone	0	1	1	5	0.10884
BP	GO:0034776	response to histamine	0	1	1	5	0.10884
BP	GO:0035385	Roundabout signaling pathway	0	1	1	5	0.10884
BP	GO:0035546	interferon-beta secretion	0	1	1	5	0.10884
BP	GO:0035547	regulation of interferon-beta secretion	0	1	1	5	0.10884
BP	GO:0035549	positive regulation of interferon-beta secretion	0	1	1	5	0.10884
BP	GO:0035812	renal sodium excretion	0	1	1	5	0.10884
BP	GO:0035873	lactate transmembrane transport	1	0	1	5	0.10884
BP	GO:0036514	dopaminergic neuron axon guidance	1	0	1	5	0.10884
BP	GO:0039533	regulation of MDA-5 signaling pathway	0	1	1	5	0.10884
BP	GO:0043615	astrocyte cell migration	0	1	1	5	0.10884
BP	GO:0044539	long-chain fatty acid import	1	0	1	5	0.10884
BP	GO:0044650	adhesion of symbiont to host cell	1	0	1	5	0.10884
BP	GO:0044793	negative regulation by host of viral process	1	0	1	5	0.10884
BP	GO:0045085	negative regulation of interleukin-2 biosynthetic process	1	0	1	5	0.10884
BP	GO:0045793	positive regulation of cell size	0	1	1	5	0.10884
BP	GO:0046113	nucleobase catabolic process	1	0	1	5	0.10884
BP	GO:0048251	elastic fiber assembly	1	0	1	5	0.10884
BP	GO:0048539	bone marrow development	1	0	1	5	0.10884
BP	GO:0048563	post-embryonic animal organ morphogenesis	1	0	1	5	0.10884
BP	GO:0048752	semicircular canal morphogenesis	1	0	1	5	0.10884
BP	GO:0050748	negative regulation of lipoprotein metabolic process	1	0	1	5	0.10884
BP	GO:0050872	white fat cell differentiation	1	0	1	5	0.10884
BP	GO:0051238	sequestering of metal ion	1	0	1	5	0.10884
BP	GO:0060297	regulation of sarcomere organization	0	1	1	5	0.10884
BP	GO:0060431	primary lung bud formation	1	0	1	5	0.10884
BP	GO:0060536	cartilage morphogenesis	1	0	1	5	0.10884
BP	GO:0060685	regulation of prostatic bud formation	1	0	1	5	0.10884
BP	GO:0060770	negative regulation of epithelial cell proliferation involved in prostate gland development	0	1	1	5	0.10884
BP	GO:0061302	smooth muscle cell-matrix adhesion	1	0	1	5	0.10884
BP	GO:0061517	macrophage proliferation	0	1	1	5	0.10884
BP	GO:0061518	microglial cell proliferation	0	1	1	5	0.10884
BP	GO:0061743	motor learning	1	0	1	5	0.10884
BP	GO:0070339	response to bacterial lipopeptide	1	0	1	5	0.10884
BP	GO:0070391	response to lipoteichoic acid	1	0	1	5	0.10884
BP	GO:0070672	response to interleukin-15	1	0	1	5	0.10884
BP	GO:0071220	cellular response to bacterial lipoprotein	1	0	1	5	0.10884
BP	GO:0071221	cellular response to bacterial lipopeptide	1	0	1	5	0.10884
BP	GO:0071223	cellular response to lipoteichoic acid	1	0	1	5	0.10884
BP	GO:0071493	cellular response to UV-B	1	0	1	5	0.10884
BP	GO:0072033	renal vesicle formation	0	1	1	5	0.10884
BP	GO:0072205	metanephric collecting duct development	0	1	1	5	0.10884
BP	GO:0072584	caveolin-mediated endocytosis	1	0	1	5	0.10884
BP	GO:0072608	interleukin-10 secretion	0	1	1	5	0.10884
BP	GO:0097411	hypoxia-inducible factor-1alpha signaling pathway	0	1	1	5	0.10884
BP	GO:0097531	mast cell migration	0	1	1	5	0.10884
BP	GO:0106049	regulation of cellular response to osmotic stress	1	0	1	5	0.10884
BP	GO:1900748	positive regulation of vascular endothelial growth factor signaling pathway	1	0	1	5	0.10884
BP	GO:1901386	negative regulation of voltage-gated calcium channel activity	1	0	1	5	0.10884
BP	GO:1901858	regulation of mitochondrial DNA metabolic process	1	0	1	5	0.10884
BP	GO:1902855	regulation of non-motile cilium assembly	0	1	1	5	0.10884
BP	GO:1903589	positive regulation of blood vessel endothelial cell proliferation involved in sprouting angiogenesis	1	0	1	5	0.10884
BP	GO:1903722	regulation of centriole elongation	0	1	1	5	0.10884
BP	GO:1903894	regulation of IRE1-mediated unfolded protein response	1	0	1	5	0.10884
BP	GO:1903960	negative regulation of anion transmembrane transport	0	1	1	5	0.10884
BP	GO:1904428	negative regulation of tubulin deacetylation	1	0	1	5	0.10884
BP	GO:1904938	planar cell polarity pathway involved in axon guidance	1	0	1	5	0.10884
BP	GO:2000643	positive regulation of early endosome to late endosome transport	1	0	1	5	0.10884
MF	GO:0004114	3',5'-cyclic-nucleotide phosphodiesterase activity	2	0	2	25	0.10885
CC	GO:0005605	basal lamina	0	1	1	5	0.10974
CC	GO:0005833	hemoglobin complex	1	0	1	5	0.10974
CC	GO:0034663	endoplasmic reticulum chaperone complex	1	0	1	5	0.10974
CC	GO:0035686	sperm fibrous sheath	0	1	1	5	0.10974
CC	GO:0043256	laminin complex	0	1	1	5	0.10974
CC	GO:0098945	intrinsic component of presynaptic active zone membrane	1	0	1	5	0.10974
CC	GO:1902710	GABA receptor complex	0	1	1	5	0.10974
CC	GO:1990393	3M complex	1	0	1	5	0.10974
BP	GO:0045069	regulation of viral genome replication	0	3	3	51	0.10993
BP	GO:0098869	cellular oxidant detoxification	2	1	3	51	0.10993
BP	GO:1903557	positive regulation of tumor necrosis factor superfamily cytokine production	1	2	3	51	0.10993
BP	GO:0007267	cell-cell signaling	14	8	22	730	0.11008
MF	GO:0030414	peptidase inhibitor activity	4	1	5	112	0.11011
BP	GO:0009954	proximal/distal pattern formation	1	1	2	25	0.1102
BP	GO:0010828	positive regulation of glucose transport	0	2	2	25	0.1102
BP	GO:0017004	cytochrome complex assembly	2	0	2	25	0.1102
BP	GO:0034340	response to type I interferon	0	2	2	25	0.1102
BP	GO:0035115	embryonic forelimb morphogenesis	1	1	2	25	0.1102
BP	GO:0051926	negative regulation of calcium ion transport	2	0	2	25	0.1102
BP	GO:0032940	secretion by cell	7	9	16	502	0.11106
CC	GO:0005753	mitochondrial proton-transporting ATP synthase complex	2	0	2	25	0.11178
CC	GO:0048786	presynaptic active zone	1	1	2	25	0.11178
MF	GO:0008233	peptidase activity	12	6	18	583	0.11272
BP	GO:0000226	microtubule cytoskeleton organization	7	5	12	355	0.11296
BP	GO:0050921	positive regulation of chemotaxis	2	2	4	81	0.11328
BP	GO:0046717	acid secretion	3	0	3	52	0.1148
CC	GO:0071944	cell periphery	54	27	81	3120	0.11553
CC	GO:0009986	cell surface	10	4	14	427	0.11603
MF	GO:0004112	cyclic-nucleotide phosphodiesterase activity	2	0	2	26	0.11623
MF	GO:0015276	ligand-gated ion channel activity	2	3	5	114	0.11635
MF	GO:0022834	ligand-gated channel activity	2	3	5	114	0.11635
BP	GO:0044281	small molecule metabolic process	20	12	32	1129	0.11638
BP	GO:0051051	negative regulation of transport	5	4	9	249	0.11642
BP	GO:0030522	intracellular receptor signaling pathway	1	5	6	146	0.1168
BP	GO:0016925	protein sumoylation	0	2	2	26	0.11766
BP	GO:0043330	response to exogenous dsRNA	0	2	2	26	0.11766
BP	GO:0043954	cellular component maintenance	1	1	2	26	0.11766
BP	GO:0045214	sarcomere organization	1	1	2	26	0.11766
BP	GO:0048247	lymphocyte chemotaxis	0	2	2	26	0.11766
BP	GO:0048662	negative regulation of smooth muscle cell proliferation	2	0	2	26	0.11766
BP	GO:2001239	regulation of extrinsic apoptotic signaling pathway in absence of ligand	1	1	2	26	0.11766
BP	GO:0032879	regulation of localization	24	19	43	1574	0.11812
BP	GO:0051224	negative regulation of protein transport	2	3	5	114	0.11901
BP	GO:0097485	neuron projection guidance	3	2	5	114	0.11901
BP	GO:0097191	extrinsic apoptotic signaling pathway	3	3	6	147	0.11959
BP	GO:0007044	cell-substrate junction assembly	3	0	3	53	0.11975
BP	GO:0045185	maintenance of protein location	2	1	3	53	0.11975
BP	GO:0061333	renal tubule morphogenesis	2	1	3	53	0.11975
BP	GO:0099531	presynaptic process involved in chemical synaptic transmission	2	2	4	83	0.12095
BP	GO:1903828	negative regulation of cellular protein localization	3	1	4	83	0.12095
CC	GO:0005740	mitochondrial envelope	11	1	12	357	0.12162
BP	GO:0007204	positive regulation of cytosolic calcium ion concentration	3	2	5	115	0.12225
BP	GO:0050679	positive regulation of epithelial cell proliferation	3	2	5	115	0.12225
BP	GO:0019932	second-messenger-mediated signaling	4	3	7	182	0.12265
BP	GO:0006897	endocytosis	8	3	11	324	0.12266
MF	GO:0031490	chromatin DNA binding	1	2	3	54	0.12279
BP	GO:0048514	blood vessel morphogenesis	6	6	12	361	0.12334
BP	GO:0006939	smooth muscle contraction	2	1	3	54	0.12478
BP	GO:1903900	regulation of viral life cycle	1	3	4	84	0.12486
BP	GO:2000377	regulation of reactive oxygen species metabolic process	3	1	4	84	0.12486
BP	GO:0002753	cytoplasmic pattern recognition receptor signaling pathway	0	2	2	27	0.12524
BP	GO:0035019	somatic stem cell population maintenance	1	1	2	27	0.12524
BP	GO:0044764	multi-organism cellular process	0	2	2	27	0.12524
BP	GO:1904950	negative regulation of establishment of protein localization	2	3	5	116	0.12553
BP	GO:0010648	negative regulation of cell communication	12	10	22	743	0.1256
BP	GO:0023061	signal release	4	4	8	218	0.12574
CC	GO:0098590	plasma membrane region	10	5	15	471	0.12679
BP	GO:0060326	cell chemotaxis	2	5	7	184	0.12778
BP	GO:0034330	cell junction organization	5	1	6	150	0.12816
BP	GO:0060485	mesenchyme development	3	3	6	150	0.12816
MF	GO:0001618	virus receptor activity	0	1	1	6	0.12825
MF	GO:0003906	DNA-(apurinic or apyrimidinic site) lyase activity	0	1	1	6	0.12825
MF	GO:0005042	netrin receptor activity	0	1	1	6	0.12825
MF	GO:0005344	oxygen carrier activity	1	0	1	6	0.12825
MF	GO:0008172	S-methyltransferase activity	1	0	1	6	0.12825
MF	GO:0008329	signaling pattern recognition receptor activity	1	0	1	6	0.12825
MF	GO:0008410	CoA-transferase activity	1	0	1	6	0.12825
MF	GO:0015166	polyol transmembrane transporter activity	0	1	1	6	0.12825
MF	GO:0015250	water channel activity	0	1	1	6	0.12825
MF	GO:0015665	alcohol transmembrane transporter activity	0	1	1	6	0.12825
MF	GO:0016723	oxidoreductase activity, oxidizing metal ions, NAD or NADP as acceptor	1	0	1	6	0.12825
MF	GO:0016725	oxidoreductase activity, acting on CH or CH2 groups	1	0	1	6	0.12825
MF	GO:0022851	GABA-gated chloride ion channel activity	0	1	1	6	0.12825
MF	GO:0030159	receptor signaling complex scaffold activity	1	0	1	6	0.12825
MF	GO:0030368	interleukin-17 receptor activity	0	1	1	6	0.12825
MF	GO:0045236	CXCR chemokine receptor binding	0	1	1	6	0.12825
MF	GO:0097001	ceramide binding	0	1	1	6	0.12825
MF	GO:0104005	hijacked molecular function	0	1	1	6	0.12825
BP	GO:0098657	import into cell	8	4	12	364	0.12872
BP	GO:0002831	regulation of response to biotic stimulus	0	4	4	85	0.12882
BP	GO:0055123	digestive system development	2	2	4	85	0.12882
BP	GO:0001547	antral ovarian follicle growth	1	0	1	6	0.12915
BP	GO:0001696	gastric acid secretion	1	0	1	6	0.12915
BP	GO:0002246	wound healing involved in inflammatory response	1	0	1	6	0.12915
BP	GO:0002604	regulation of dendritic cell antigen processing and presentation	0	1	1	6	0.12915
BP	GO:0002934	desmosome organization	1	0	1	6	0.12915
BP	GO:0003097	renal water transport	0	1	1	6	0.12915
BP	GO:0006072	glycerol-3-phosphate metabolic process	0	1	1	6	0.12915
BP	GO:0007196	adenylate cyclase-inhibiting G-protein coupled glutamate receptor signaling pathway	1	0	1	6	0.12915
BP	GO:0008627	intrinsic apoptotic signaling pathway in response to osmotic stress	1	0	1	6	0.12915
BP	GO:0009133	nucleoside diphosphate biosynthetic process	0	1	1	6	0.12915
BP	GO:0009151	purine deoxyribonucleotide metabolic process	0	1	1	6	0.12915
BP	GO:0009215	purine deoxyribonucleoside triphosphate metabolic process	0	1	1	6	0.12915
BP	GO:0009265	2'-deoxyribonucleotide biosynthetic process	0	1	1	6	0.12915
BP	GO:0009650	UV protection	1	0	1	6	0.12915
BP	GO:0010749	regulation of nitric oxide mediated signal transduction	0	1	1	6	0.12915
BP	GO:0010763	positive regulation of fibroblast migration	0	1	1	6	0.12915
BP	GO:0010935	regulation of macrophage cytokine production	1	0	1	6	0.12915
BP	GO:0015793	glycerol transport	0	1	1	6	0.12915
BP	GO:0015824	proline transport	1	0	1	6	0.12915
BP	GO:0031055	chromatin remodeling at centromere	0	1	1	6	0.12915
BP	GO:0031643	positive regulation of myelination	1	0	1	6	0.12915
BP	GO:0032069	regulation of nuclease activity	0	1	1	6	0.12915
BP	GO:0033327	Leydig cell differentiation	0	1	1	6	0.12915
BP	GO:0035766	cell chemotaxis to fibroblast growth factor	0	1	1	6	0.12915
BP	GO:0035768	endothelial cell chemotaxis to fibroblast growth factor	0	1	1	6	0.12915
BP	GO:0042447	hormone catabolic process	0	1	1	6	0.12915
BP	GO:0042482	positive regulation of odontogenesis	1	0	1	6	0.12915
BP	GO:0046385	deoxyribose phosphate biosynthetic process	0	1	1	6	0.12915
BP	GO:0046601	positive regulation of centriole replication	0	1	1	6	0.12915
BP	GO:0060100	positive regulation of phagocytosis, engulfment	1	0	1	6	0.12915
BP	GO:0060449	bud elongation involved in lung branching	1	0	1	6	0.12915
BP	GO:0060872	semicircular canal development	1	0	1	6	0.12915
BP	GO:0061140	lung secretory cell differentiation	1	0	1	6	0.12915
BP	GO:0061511	centriole elongation	0	1	1	6	0.12915
BP	GO:0061525	hindgut development	0	1	1	6	0.12915
BP	GO:0070099	regulation of chemokine-mediated signaling pathway	0	1	1	6	0.12915
BP	GO:0070100	negative regulation of chemokine-mediated signaling pathway	0	1	1	6	0.12915
BP	GO:0070327	thyroid hormone transport	1	0	1	6	0.12915
BP	GO:0070933	histone H4 deacetylation	0	1	1	6	0.12915
BP	GO:0071447	cellular response to hydroperoxide	1	0	1	6	0.12915
BP	GO:0071600	otic vesicle morphogenesis	1	0	1	6	0.12915
BP	GO:0071694	maintenance of protein location in extracellular region	1	0	1	6	0.12915
BP	GO:0086100	endothelin receptor signaling pathway	0	1	1	6	0.12915
BP	GO:0090009	primitive streak formation	1	0	1	6	0.12915
BP	GO:0090594	inflammatory response to wounding	1	0	1	6	0.12915
BP	GO:1901620	regulation of smoothened signaling pathway involved in dorsal/ventral neural tube patterning	0	1	1	6	0.12915
BP	GO:1901857	positive regulation of cellular respiration	1	0	1	6	0.12915
BP	GO:1902459	positive regulation of stem cell population maintenance	0	1	1	6	0.12915
BP	GO:1903011	negative regulation of bone development	1	0	1	6	0.12915
BP	GO:1903651	positive regulation of cytoplasmic transport	1	0	1	6	0.12915
BP	GO:1904468	negative regulation of tumor necrosis factor secretion	0	1	1	6	0.12915
BP	GO:1904847	regulation of cell chemotaxis to fibroblast growth factor	0	1	1	6	0.12915
BP	GO:1904889	regulation of excitatory synapse assembly	1	0	1	6	0.12915
BP	GO:1905155	positive regulation of membrane invagination	1	0	1	6	0.12915
BP	GO:2000544	regulation of endothelial cell chemotaxis to fibroblast growth factor	0	1	1	6	0.12915
BP	GO:2000045	regulation of G1/S transition of mitotic cell cycle	3	0	3	55	0.12988
CC	GO:0005577	fibrinogen complex	0	1	1	6	0.1302
CC	GO:0033270	paranode region of axon	1	0	1	6	0.1302
CC	GO:0043186	P granule	0	1	1	6	0.1302
CC	GO:0045495	pole plasm	0	1	1	6	0.1302
CC	GO:0048787	presynaptic active zone membrane	1	0	1	6	0.1302
CC	GO:0060293	germ plasm	0	1	1	6	0.1302
BP	GO:0048583	regulation of response to stimulus	29	29	58	2206	0.1305
BP	GO:0023057	negative regulation of signaling	12	10	22	747	0.13063
MF	GO:0005548	phospholipid transporter activity	2	0	2	28	0.13135
MF	GO:0015485	cholesterol binding	2	0	2	28	0.13135
BP	GO:0048869	cellular developmental process	37	21	58	2208	0.13204
BP	GO:0034329	cell junction assembly	4	1	5	118	0.13222
BP	GO:0071822	protein complex subunit organization	15	9	24	827	0.13258
BP	GO:0046661	male sex differentiation	2	2	4	86	0.13284
BP	GO:0002762	negative regulation of myeloid leukocyte differentiation	2	0	2	28	0.13294
BP	GO:0006809	nitric oxide biosynthetic process	2	0	2	28	0.13294
BP	GO:0007200	phospholipase C-activating G-protein coupled receptor signaling pathway	1	1	2	28	0.13294
BP	GO:0008347	glial cell migration	0	2	2	28	0.13294
BP	GO:0072348	sulfur compound transport	0	2	2	28	0.13294
BP	GO:0031401	positive regulation of protein modification process	8	12	20	671	0.13314
MF	GO:0070011	peptidase activity, acting on L-amino acid peptides	12	5	17	560	0.13426
BP	GO:0003014	renal system process	1	2	3	56	0.13506
BP	GO:0008585	female gonad development	1	2	3	56	0.13506
BP	GO:0031110	regulation of microtubule polymerization or depolymerization	0	3	3	56	0.13506
BP	GO:0043271	negative regulation of ion transport	2	1	3	56	0.13506
BP	GO:0055072	iron ion homeostasis	3	0	3	56	0.13506
BP	GO:0098754	detoxification	2	1	3	56	0.13506
BP	GO:1902106	negative regulation of leukocyte differentiation	3	0	3	56	0.13506
BP	GO:1990748	cellular detoxification	2	1	3	56	0.13506
BP	GO:0042060	wound healing	5	3	8	222	0.1353
BP	GO:0006836	neurotransmitter transport	3	2	5	119	0.13562
BP	GO:0042742	defense response to bacterium	4	1	5	119	0.13562
BP	GO:0048863	stem cell differentiation	2	3	5	119	0.13562
MF	GO:0016705	oxidoreductase activity, acting on paired donors, with incorporation or reduction of molecular oxygen	6	0	6	154	0.13665
BP	GO:0009617	response to bacterium	5	5	10	295	0.13753
CC	GO:0000794	condensed nuclear chromosome	3	0	3	56	0.13756
BP	GO:0010631	epithelial cell migration	3	4	7	188	0.13838
BP	GO:0048468	cell development	23	10	33	1191	0.13849
MF	GO:0004181	metallocarboxypeptidase activity	1	1	2	29	0.13907
MF	GO:0008289	lipid binding	8	5	13	410	0.13916
BP	GO:0032387	negative regulation of intracellular transport	2	1	3	57	0.1403
BP	GO:0048709	oligodendrocyte differentiation	3	0	3	57	0.1403
BP	GO:0050922	negative regulation of chemotaxis	0	2	2	29	0.14074
BP	GO:0002221	pattern recognition receptor signaling pathway	2	2	4	88	0.14103
BP	GO:0090132	epithelium migration	3	4	7	189	0.1411
MF	GO:0022804	active transmembrane transporter activity	5	3	8	226	0.14111
BP	GO:0043623	cellular protein complex assembly	8	4	12	371	0.14179
BP	GO:0001525	angiogenesis	4	6	10	297	0.1418
CC	GO:0005921	gap junction	2	0	2	29	0.14269
BP	GO:0002758	innate immune response-activating signal transduction	2	2	4	89	0.1452
BP	GO:0009636	response to toxic substance	3	1	4	89	0.1452
BP	GO:0048489	synaptic vesicle transport	2	2	4	89	0.1452
BP	GO:0097480	establishment of synaptic vesicle localization	2	2	4	89	0.1452
BP	GO:0001578	microtubule bundle formation	2	1	3	58	0.14561
BP	GO:0008037	cell recognition	3	0	3	58	0.14561
BP	GO:0016079	synaptic vesicle exocytosis	1	2	3	58	0.14561
BP	GO:0021782	glial cell development	3	0	3	58	0.14561
BP	GO:0046545	development of primary female sexual characteristics	1	2	3	58	0.14561
BP	GO:0016310	phosphorylation	21	20	41	1523	0.14565
BP	GO:0007162	negative regulation of cell adhesion	5	1	6	156	0.14616
BP	GO:0070372	regulation of ERK1 and ERK2 cascade	3	3	6	156	0.14616
MF	GO:0001846	opsonin binding	1	0	1	7	0.14796
MF	GO:0001848	complement binding	1	0	1	7	0.14796
MF	GO:0004571	mannosyl-oligosaccharide 1,2-alpha-mannosidase activity	1	0	1	7	0.14796
MF	GO:0004693	cyclin-dependent protein serine/threonine kinase activity	1	0	1	7	0.14796
MF	GO:0005041	low-density lipoprotein receptor activity	1	0	1	7	0.14796
MF	GO:0005372	water transmembrane transporter activity	0	1	1	7	0.14796
MF	GO:0005537	mannose binding	1	0	1	7	0.14796
MF	GO:0008253	5'-nucleotidase activity	1	0	1	7	0.14796
MF	GO:0015245	fatty acid transporter activity	1	0	1	7	0.14796
MF	GO:0015301	anion:anion antiporter activity	0	1	1	7	0.14796
MF	GO:0015924	mannosyl-oligosaccharide mannosidase activity	1	0	1	7	0.14796
MF	GO:0031432	titin binding	0	1	1	7	0.14796
MF	GO:0031957	very long-chain fatty acid-CoA ligase activity	0	1	1	7	0.14796
MF	GO:0031994	insulin-like growth factor I binding	1	0	1	7	0.14796
MF	GO:0034596	phosphatidylinositol phosphate 4-phosphatase activity	1	0	1	7	0.14796
MF	GO:0051861	glycolipid binding	0	1	1	7	0.14796
MF	GO:0097472	cyclin-dependent protein kinase activity	1	0	1	7	0.14796
MF	GO:0106019	phosphatidylinositol-4,5-bisphosphate phosphatase activity	1	0	1	7	0.14796
CC	GO:1903561	extracellular vesicle	1	2	3	58	0.14827
MF	GO:0042803	protein homodimerization activity	10	3	13	415	0.14828
BP	GO:0003156	regulation of animal organ formation	2	0	2	30	0.14864
BP	GO:0010324	membrane invagination	1	1	2	30	0.14864
BP	GO:0032655	regulation of interleukin-12 production	1	1	2	30	0.14864
BP	GO:0033173	calcineurin-NFAT signaling cascade	2	0	2	30	0.14864
BP	GO:0043030	regulation of macrophage activation	1	1	2	30	0.14864
BP	GO:0043616	keratinocyte proliferation	2	0	2	30	0.14864
BP	GO:0046209	nitric oxide metabolic process	2	0	2	30	0.14864
BP	GO:0097720	calcineurin-mediated signaling	2	0	2	30	0.14864
BP	GO:0098586	cellular response to virus	0	2	2	30	0.14864
MF	GO:0004197	cysteine-type endopeptidase activity	1	2	3	59	0.14866
BP	GO:0002468	dendritic cell antigen processing and presentation	0	1	1	7	0.149
BP	GO:0006103	2-oxoglutarate metabolic process	1	0	1	7	0.149
BP	GO:0006517	protein deglycosylation	1	0	1	7	0.149
BP	GO:0006689	ganglioside catabolic process	0	1	1	7	0.149
BP	GO:0009219	pyrimidine deoxyribonucleotide metabolic process	0	1	1	7	0.149
BP	GO:0009886	post-embryonic animal morphogenesis	1	0	1	7	0.149
BP	GO:0010870	positive regulation of receptor biosynthetic process	0	1	1	7	0.149
BP	GO:0010934	macrophage cytokine production	1	0	1	7	0.149
BP	GO:0015721	bile acid and bile salt transport	1	0	1	7	0.149
BP	GO:0015732	prostaglandin transport	1	0	1	7	0.149
BP	GO:0015816	glycine transport	1	0	1	7	0.149
BP	GO:0016114	terpenoid biosynthetic process	0	1	1	7	0.149
BP	GO:0019227	neuronal action potential propagation	1	0	1	7	0.149
BP	GO:0019370	leukotriene biosynthetic process	1	0	1	7	0.149
BP	GO:0031115	negative regulation of microtubule polymerization	0	1	1	7	0.149
BP	GO:0031666	positive regulation of lipopolysaccharide-mediated signaling pathway	0	1	1	7	0.149
BP	GO:0032530	regulation of microvillus organization	1	0	1	7	0.149
BP	GO:0032536	regulation of cell projection size	1	0	1	7	0.149
BP	GO:0032908	regulation of transforming growth factor beta1 production	0	1	1	7	0.149
BP	GO:0035581	sequestering of extracellular ligand from receptor	1	0	1	7	0.149
BP	GO:0035810	positive regulation of urine volume	0	1	1	7	0.149
BP	GO:0036158	outer dynein arm assembly	0	1	1	7	0.149
BP	GO:0038007	netrin-activated signaling pathway	0	1	1	7	0.149
BP	GO:0042693	muscle cell fate commitment	1	0	1	7	0.149
BP	GO:0043247	telomere maintenance in response to DNA damage	0	1	1	7	0.149
BP	GO:0046602	regulation of mitotic centrosome separation	1	0	1	7	0.149
BP	GO:0047484	regulation of response to osmotic stress	1	0	1	7	0.149
BP	GO:0048266	behavioral response to pain	1	0	1	7	0.149
BP	GO:0048875	chemical homeostasis within a tissue	1	0	1	7	0.149
BP	GO:0051152	positive regulation of smooth muscle cell differentiation	0	1	1	7	0.149
BP	GO:0051482	positive regulation of cytosolic calcium ion concentration involved in phospholipase C-activating G-protein coupled signaling pathway	0	1	1	7	0.149
BP	GO:0051917	regulation of fibrinolysis	0	1	1	7	0.149
BP	GO:0060019	radial glial cell differentiation	1	0	1	7	0.149
BP	GO:0060099	regulation of phagocytosis, engulfment	1	0	1	7	0.149
BP	GO:0060242	contact inhibition	1	0	1	7	0.149
BP	GO:0060677	ureteric bud elongation	0	1	1	7	0.149
BP	GO:0060693	regulation of branching involved in salivary gland morphogenesis	1	0	1	7	0.149
BP	GO:0070365	hepatocyte differentiation	1	0	1	7	0.149
BP	GO:0071280	cellular response to copper ion	0	1	1	7	0.149
BP	GO:0071692	protein localization to extracellular region	1	0	1	7	0.149
BP	GO:0072044	collecting duct development	0	1	1	7	0.149
BP	GO:0072378	blood coagulation, fibrin clot formation	1	0	1	7	0.149
BP	GO:0072641	type I interferon secretion	0	1	1	7	0.149
BP	GO:0072642	interferon-alpha secretion	0	1	1	7	0.149
BP	GO:0097067	cellular response to thyroid hormone stimulus	1	0	1	7	0.149
BP	GO:0098870	action potential propagation	1	0	1	7	0.149
BP	GO:0099612	protein localization to axon	1	0	1	7	0.149
BP	GO:0099624	atrial cardiac muscle cell membrane repolarization	0	1	1	7	0.149
BP	GO:1900115	extracellular regulation of signal transduction	1	0	1	7	0.149
BP	GO:1900116	extracellular negative regulation of signal transduction	1	0	1	7	0.149
BP	GO:1900246	positive regulation of RIG-I signaling pathway	0	1	1	7	0.149
BP	GO:1900272	negative regulation of long-term synaptic potentiation	1	0	1	7	0.149
BP	GO:1900747	negative regulation of vascular endothelial growth factor signaling pathway	1	0	1	7	0.149
BP	GO:1902739	regulation of interferon-alpha secretion	0	1	1	7	0.149
BP	GO:1902741	positive regulation of interferon-alpha secretion	0	1	1	7	0.149
BP	GO:1905063	regulation of vascular smooth muscle cell differentiation	0	1	1	7	0.149
BP	GO:1905153	regulation of membrane invagination	1	0	1	7	0.149
BP	GO:2000096	positive regulation of Wnt signaling pathway, planar cell polarity pathway	1	0	1	7	0.149
BP	GO:2001169	regulation of ATP biosynthetic process	1	0	1	7	0.149
BP	GO:0042063	gliogenesis	4	2	6	157	0.14927
BP	GO:0090130	tissue migration	3	4	7	192	0.14939
BP	GO:0043406	positive regulation of MAP kinase activity	1	4	5	123	0.1496
BP	GO:0042592	homeostatic process	16	11	27	960	0.14971
CC	GO:0016324	apical plasma membrane	1	4	5	122	0.14975
BP	GO:0071900	regulation of protein serine/threonine kinase activity	3	6	9	264	0.1498
CC	GO:0099026	anchored component of presynaptic membrane	1	0	1	7	0.1502
BP	GO:0043900	regulation of multi-organism process	1	7	8	228	0.15032
BP	GO:0006334	nucleosome assembly	0	3	3	59	0.15099
BP	GO:0048259	regulation of receptor-mediated endocytosis	3	0	3	59	0.15099
BP	GO:0072676	lymphocyte migration	1	2	3	59	0.15099
BP	GO:0097237	cellular response to toxic substance	2	1	3	59	0.15099
MF	GO:0005515	protein binding	82	64	146	6033	0.15132
MF	GO:0038024	cargo receptor activity	3	0	3	60	0.15403
BP	GO:0001656	metanephros development	1	2	3	60	0.15643
BP	GO:0031644	regulation of neurological system process	2	0	2	31	0.15662
BP	GO:0050766	positive regulation of phagocytosis	2	0	2	31	0.15662
BP	GO:2001057	reactive nitrogen species metabolic process	2	0	2	31	0.15662
MF	GO:0046983	protein dimerization activity	14	7	21	733	0.15792
BP	GO:0035239	tube morphogenesis	5	3	8	231	0.15812
MF	GO:0042802	identical protein binding	16	13	29	1055	0.15853
CC	GO:0044304	main axon	2	0	2	31	0.15876
CC	GO:0046658	anchored component of plasma membrane	1	1	2	31	0.15876
MF	GO:0043492	ATPase activity, coupled to movement of substances	3	1	4	93	0.15936
BP	GO:0008285	negative regulation of cell proliferation	7	5	12	380	0.15961
BP	GO:0010647	positive regulation of cell communication	13	14	27	968	0.15975
BP	GO:0030030	cell projection organization	16	6	22	769	0.16041
CC	GO:0098798	mitochondrial protein complex	5	0	5	125	0.16073
MF	GO:0030246	carbohydrate binding	5	1	6	162	0.1614
BP	GO:0065008	regulation of biological quality	34	20	54	2077	0.16167
BP	GO:0009653	anatomical structure morphogenesis	24	17	41	1539	0.16173
BP	GO:0060993	kidney morphogenesis	2	1	3	61	0.16193
BP	GO:0090100	positive regulation of transmembrane receptor protein serine/threonine kinase signaling pathway	2	1	3	61	0.16193
BP	GO:0098661	inorganic anion transmembrane transport	0	3	3	61	0.16193
BP	GO:0043901	negative regulation of multi-organism process	1	3	4	93	0.16233
BP	GO:0099003	vesicle-mediated transport in synapse	2	2	4	93	0.16233
MF	GO:0016877	ligase activity, forming carbon-sulfur bonds	1	1	2	32	0.16278
MF	GO:0030374	ligand-dependent nuclear receptor transcription coactivator activity	2	0	2	32	0.16278
MF	GO:0015291	secondary active transmembrane transporter activity	3	2	5	128	0.1644
BP	GO:0000768	syncytium formation by plasma membrane fusion	1	1	2	32	0.16468
BP	GO:0006949	syncytium formation	1	1	2	32	0.16468
BP	GO:0032615	interleukin-12 production	1	1	2	32	0.16468
BP	GO:0032720	negative regulation of tumor necrosis factor production	1	1	2	32	0.16468
BP	GO:0035136	forelimb morphogenesis	1	1	2	32	0.16468
BP	GO:0048806	genitalia development	1	1	2	32	0.16468
BP	GO:0060359	response to ammonium ion	1	1	2	32	0.16468
BP	GO:1901655	cellular response to ketone	1	1	2	32	0.16468
BP	GO:0006796	phosphate-containing compound metabolic process	31	24	55	2122	0.16469
BP	GO:0080134	regulation of response to stress	11	11	22	772	0.16474
CC	GO:0043230	extracellular organelle	1	2	3	61	0.16483
BP	GO:0023056	positive regulation of signaling	13	14	27	973	0.16621
BP	GO:0044085	cellular component biogenesis	31	15	46	1750	0.16658
BP	GO:0009967	positive regulation of signal transduction	11	14	25	893	0.16661
BP	GO:0007224	smoothened signaling pathway	2	2	4	94	0.16673
BP	GO:0046822	regulation of nucleocytoplasmic transport	3	1	4	94	0.16673
BP	GO:0099504	synaptic vesicle cycle	2	2	4	94	0.16673
BP	GO:0051962	positive regulation of nervous system development	7	2	9	271	0.16685
CC	GO:0031985	Golgi cisterna	0	2	2	32	0.16691
MF	GO:0003691	double-stranded telomeric DNA binding	0	1	1	8	0.16724
MF	GO:0005536	glucose binding	1	0	1	8	0.16724
MF	GO:0008252	nucleotidase activity	1	0	1	8	0.16724
MF	GO:0008417	fucosyltransferase activity	0	1	1	8	0.16724
MF	GO:0015165	pyrimidine nucleotide-sugar transmembrane transporter activity	1	0	1	8	0.16724
MF	GO:0016307	phosphatidylinositol phosphate kinase activity	1	0	1	8	0.16724
MF	GO:0035255	ionotropic glutamate receptor binding	0	1	1	8	0.16724
MF	GO:0036041	long-chain fatty acid binding	1	0	1	8	0.16724
MF	GO:0045505	dynein intermediate chain binding	0	1	1	8	0.16724
MF	GO:0070492	oligosaccharide binding	0	1	1	8	0.16724
MF	GO:0086008	voltage-gated potassium channel activity involved in cardiac muscle cell action potential repolarization	0	1	1	8	0.16724
MF	GO:1904047	S-adenosyl-L-methionine binding	1	0	1	8	0.16724
BP	GO:0000187	activation of MAPK activity	1	2	3	62	0.16749
BP	GO:0001942	hair follicle development	3	0	3	62	0.16749
BP	GO:0030510	regulation of BMP signaling pathway	2	1	3	62	0.16749
BP	GO:0061138	morphogenesis of a branching epithelium	4	1	5	128	0.1679
BP	GO:0098655	cation transmembrane transport	10	6	16	538	0.16797
BP	GO:0001886	endothelial cell morphogenesis	1	0	1	8	0.16839
BP	GO:0002407	dendritic cell chemotaxis	0	1	1	8	0.16839
BP	GO:0002523	leukocyte migration involved in inflammatory response	0	1	1	8	0.16839
BP	GO:0002544	chronic inflammatory response	0	1	1	8	0.16839
BP	GO:0003334	keratinocyte development	1	0	1	8	0.16839
BP	GO:0006020	inositol metabolic process	0	1	1	8	0.16839
BP	GO:0009204	deoxyribonucleoside triphosphate catabolic process	0	1	1	8	0.16839
BP	GO:0009651	response to salt stress	1	0	1	8	0.16839
BP	GO:0010744	positive regulation of macrophage derived foam cell differentiation	1	0	1	8	0.16839
BP	GO:0010755	regulation of plasminogen activation	0	1	1	8	0.16839
BP	GO:0010825	positive regulation of centrosome duplication	0	1	1	8	0.16839
BP	GO:0010838	positive regulation of keratinocyte proliferation	1	0	1	8	0.16839
BP	GO:0010839	negative regulation of keratinocyte proliferation	1	0	1	8	0.16839
BP	GO:0015671	oxygen transport	1	0	1	8	0.16839
BP	GO:0015781	pyrimidine nucleotide-sugar transport	1	0	1	8	0.16839
BP	GO:0015791	polyol transport	0	1	1	8	0.16839
BP	GO:0030206	chondroitin sulfate biosynthetic process	1	0	1	8	0.16839
BP	GO:0030277	maintenance of gastrointestinal epithelium	0	1	1	8	0.16839
BP	GO:0032060	bleb assembly	1	0	1	8	0.16839
BP	GO:0032438	melanosome organization	0	1	1	8	0.16839
BP	GO:0032905	transforming growth factor beta1 production	0	1	1	8	0.16839
BP	GO:0033147	negative regulation of intracellular estrogen receptor signaling pathway	0	1	1	8	0.16839
BP	GO:0033235	positive regulation of protein sumoylation	0	1	1	8	0.16839
BP	GO:0034755	iron ion transmembrane transport	1	0	1	8	0.16839
BP	GO:0035376	sterol import	1	0	1	8	0.16839
BP	GO:0036498	IRE1-mediated unfolded protein response	1	0	1	8	0.16839
BP	GO:0043046	DNA methylation involved in gamete generation	0	1	1	8	0.16839
BP	GO:0044406	adhesion of symbiont to host	1	0	1	8	0.16839
BP	GO:0045602	negative regulation of endothelial cell differentiation	1	0	1	8	0.16839
BP	GO:0046386	deoxyribose phosphate catabolic process	0	1	1	8	0.16839
BP	GO:0046606	negative regulation of centrosome cycle	1	0	1	8	0.16839
BP	GO:0048569	post-embryonic animal organ development	1	0	1	8	0.16839
BP	GO:0048753	pigment granule organization	0	1	1	8	0.16839
BP	GO:0052646	alditol phosphate metabolic process	0	1	1	8	0.16839
BP	GO:0060080	inhibitory postsynaptic potential	0	1	1	8	0.16839
BP	GO:0060638	mesenchymal-epithelial cell signaling	1	0	1	8	0.16839
BP	GO:0060768	regulation of epithelial cell proliferation involved in prostate gland development	0	1	1	8	0.16839
BP	GO:0070508	cholesterol import	1	0	1	8	0.16839
BP	GO:0072321	chaperone-mediated protein transport	0	1	1	8	0.16839
BP	GO:0090481	pyrimidine nucleotide-sugar transmembrane transport	1	0	1	8	0.16839
BP	GO:0097066	response to thyroid hormone	1	0	1	8	0.16839
BP	GO:1900037	regulation of cellular response to hypoxia	0	1	1	8	0.16839
BP	GO:1900225	regulation of NLRP3 inflammasome complex assembly	1	0	1	8	0.16839
BP	GO:1901678	iron coordination entity transport	1	0	1	8	0.16839
BP	GO:1903792	negative regulation of anion transport	0	1	1	8	0.16839
BP	GO:2000121	regulation of removal of superoxide radicals	1	0	1	8	0.16839
BP	GO:2000191	regulation of fatty acid transport	0	1	1	8	0.16839
BP	GO:2000786	positive regulation of autophagosome assembly	1	0	1	8	0.16839
BP	GO:2001212	regulation of vasculogenesis	1	0	1	8	0.16839
CC	GO:0001931	uropod	1	0	1	8	0.16973
CC	GO:0005858	axonemal dynein complex	0	1	1	8	0.16973
CC	GO:0031254	cell trailing edge	1	0	1	8	0.16973
CC	GO:0033268	node of Ranvier	1	0	1	8	0.16973
CC	GO:0042788	polysomal ribosome	0	1	1	8	0.16973
CC	GO:0043083	synaptic cleft	1	0	1	8	0.16973
CC	GO:0045275	respiratory chain complex III	1	0	1	8	0.16973
BP	GO:0045089	positive regulation of innate immune response	3	2	5	129	0.17166
BP	GO:0021532	neural tube patterning	1	1	2	33	0.17282
BP	GO:0042775	mitochondrial ATP synthesis coupled electron transport	2	0	2	33	0.17282
BP	GO:0043502	regulation of muscle adaptation	1	1	2	33	0.17282
BP	GO:0048546	digestive tract morphogenesis	1	1	2	33	0.17282
BP	GO:0050891	multicellular organismal water homeostasis	0	2	2	33	0.17282
BP	GO:1903556	negative regulation of tumor necrosis factor superfamily cytokine production	1	1	2	33	0.17282
BP	GO:0008277	regulation of G-protein coupled receptor protein signaling pathway	2	1	3	63	0.1731
BP	GO:0022404	molting cycle process	3	0	3	63	0.1731
BP	GO:0022405	hair cycle process	3	0	3	63	0.1731
BP	GO:0070167	regulation of biomineral tissue development	2	1	3	63	0.1731
BP	GO:0098773	skin epidermis development	3	0	3	63	0.1731
BP	GO:0042325	regulation of phosphorylation	10	14	24	859	0.17512
CC	GO:0016528	sarcoplasm	2	0	2	33	0.17513
BP	GO:0010951	negative regulation of endopeptidase activity	3	2	5	130	0.17545
BP	GO:0050807	regulation of synapse organization	4	0	4	96	0.17564
CC	GO:0099699	integral component of synaptic membrane	3	0	3	63	0.17616
BP	GO:0051090	regulation of DNA binding transcription factor activity	3	5	8	238	0.17704
BP	GO:0001816	cytokine production	6	7	13	427	0.17771
BP	GO:0070371	ERK1 and ERK2 cascade	3	3	6	166	0.17852
BP	GO:0045861	negative regulation of proteolysis	4	3	7	202	0.17863
BP	GO:0019079	viral genome replication	0	3	3	64	0.17877
BP	GO:0051262	protein tetramerization	1	2	3	64	0.17877
BP	GO:0010634	positive regulation of epithelial cell migration	2	2	4	97	0.18016
BP	GO:0050803	regulation of synapse structure or activity	4	0	4	97	0.18016
BP	GO:0097479	synaptic vesicle localization	2	2	4	97	0.18016
BP	GO:0051049	regulation of transport	15	12	27	984	0.18094
BP	GO:0003300	cardiac muscle hypertrophy	1	1	2	34	0.18101
BP	GO:0006826	iron ion transport	2	0	2	34	0.18101
BP	GO:0030514	negative regulation of BMP signaling pathway	1	1	2	34	0.18101
BP	GO:0035082	axoneme assembly	1	1	2	34	0.18101
BP	GO:0042440	pigment metabolic process	2	0	2	34	0.18101
BP	GO:1903426	regulation of reactive oxygen species biosynthetic process	2	0	2	34	0.18101
BP	GO:2000242	negative regulation of reproductive process	1	1	2	34	0.18101
BP	GO:0060562	epithelial tube morphogenesis	5	2	7	203	0.18168
MF	GO:0046982	protein heterodimerization activity	3	5	8	242	0.18328
CC	GO:0005881	cytoplasmic microtubule	2	0	2	34	0.18342
BP	GO:0046916	cellular transition metal ion homeostasis	3	0	3	65	0.18448
BP	GO:0061326	renal tubule development	2	1	3	65	0.18448
BP	GO:1902806	regulation of cell cycle G1/S phase transition	3	0	3	65	0.18448
BP	GO:2001237	negative regulation of extrinsic apoptotic signaling pathway	2	1	3	65	0.18448
BP	GO:1903046	meiotic cell cycle process	3	1	4	98	0.18472
MF	GO:0004016	adenylate cyclase activity	1	0	1	9	0.18608
MF	GO:0005338	nucleotide-sugar transmembrane transporter activity	1	0	1	9	0.18608
MF	GO:0008242	omega peptidase activity	1	0	1	9	0.18608
MF	GO:0015106	bicarbonate transmembrane transporter activity	1	0	1	9	0.18608
MF	GO:0016813	hydrolase activity, acting on carbon-nitrogen (but not peptide) bonds, in linear amidines	0	1	1	9	0.18608
MF	GO:0017128	phospholipid scramblase activity	1	0	1	9	0.18608
MF	GO:0032947	protein complex scaffold activity	1	0	1	9	0.18608
MF	GO:0046625	sphingolipid binding	0	1	1	9	0.18608
BP	GO:0071383	cellular response to steroid hormone stimulus	3	2	5	133	0.18702
MF	GO:0016779	nucleotidyltransferase activity	3	2	5	134	0.18709
MF	GO:0004536	deoxyribonuclease activity	1	1	2	35	0.18713
MF	GO:0072341	modified amino acid binding	1	1	2	35	0.18713
BP	GO:0000212	meiotic spindle organization	1	0	1	9	0.18735
BP	GO:0003091	renal water homeostasis	0	1	1	9	0.18735
BP	GO:0003180	aortic valve morphogenesis	0	1	1	9	0.18735
BP	GO:0006910	phagocytosis, recognition	1	0	1	9	0.18735
BP	GO:0009263	deoxyribonucleotide biosynthetic process	0	1	1	9	0.18735
BP	GO:0009264	deoxyribonucleotide catabolic process	0	1	1	9	0.18735
BP	GO:0010224	response to UV-B	1	0	1	9	0.18735
BP	GO:0010642	negative regulation of platelet-derived growth factor receptor signaling pathway	1	0	1	9	0.18735
BP	GO:0015669	gas transport	1	0	1	9	0.18735
BP	GO:0015701	bicarbonate transport	0	1	1	9	0.18735
BP	GO:0015780	nucleotide-sugar transport	1	0	1	9	0.18735
BP	GO:0016322	neuron remodeling	1	0	1	9	0.18735
BP	GO:0021670	lateral ventricle development	0	1	1	9	0.18735
BP	GO:0030299	intestinal cholesterol absorption	1	0	1	9	0.18735
BP	GO:0030948	negative regulation of vascular endothelial growth factor receptor signaling pathway	1	0	1	9	0.18735
BP	GO:0030953	astral microtubule organization	1	0	1	9	0.18735
BP	GO:0031646	positive regulation of neurological system process	1	0	1	9	0.18735
BP	GO:0032682	negative regulation of chemokine production	1	0	1	9	0.18735
BP	GO:0032695	negative regulation of interleukin-12 production	0	1	1	9	0.18735
BP	GO:0032717	negative regulation of interleukin-8 production	1	0	1	9	0.18735
BP	GO:0033280	response to vitamin D	0	1	1	9	0.18735
BP	GO:0034214	protein hexamerization	1	0	1	9	0.18735
BP	GO:0034383	low-density lipoprotein particle clearance	1	0	1	9	0.18735
BP	GO:0042953	lipoprotein transport	1	0	1	9	0.18735
BP	GO:0043486	histone exchange	0	1	1	9	0.18735
BP	GO:0044090	positive regulation of vacuole organization	1	0	1	9	0.18735
BP	GO:0044546	NLRP3 inflammasome complex assembly	1	0	1	9	0.18735
BP	GO:0044872	lipoprotein localization	1	0	1	9	0.18735
BP	GO:0048148	behavioral response to cocaine	1	0	1	9	0.18735
BP	GO:0048548	regulation of pinocytosis	1	0	1	9	0.18735
BP	GO:0050746	regulation of lipoprotein metabolic process	1	0	1	9	0.18735
BP	GO:0050930	induction of positive chemotaxis	1	0	1	9	0.18735
BP	GO:0051549	positive regulation of keratinocyte migration	1	0	1	9	0.18735
BP	GO:0060055	angiogenesis involved in wound healing	0	1	1	9	0.18735
BP	GO:0060174	limb bud formation	1	0	1	9	0.18735
BP	GO:0060766	negative regulation of androgen receptor signaling pathway	1	0	1	9	0.18735
BP	GO:0060767	epithelial cell proliferation involved in prostate gland development	0	1	1	9	0.18735
BP	GO:0061081	positive regulation of myeloid leukocyte cytokine production involved in immune response	1	0	1	9	0.18735
BP	GO:0090043	regulation of tubulin deacetylation	1	0	1	9	0.18735
BP	GO:0090280	positive regulation of calcium ion import	1	0	1	9	0.18735
BP	GO:1900016	negative regulation of cytokine production involved in inflammatory response	1	0	1	9	0.18735
BP	GO:1904469	positive regulation of tumor necrosis factor secretion	0	1	1	9	0.18735
BP	GO:2000353	positive regulation of endothelial cell apoptotic process	0	1	1	9	0.18735
BP	GO:2000641	regulation of early endosome to late endosome transport	1	0	1	9	0.18735
BP	GO:2000647	negative regulation of stem cell proliferation	1	0	1	9	0.18735
BP	GO:2000727	positive regulation of cardiac muscle cell differentiation	0	1	1	9	0.18735
BP	GO:2001224	positive regulation of neuron migration	1	0	1	9	0.18735
BP	GO:0051094	positive regulation of developmental process	14	8	22	787	0.18736
MF	GO:0050660	flavin adenine dinucleotide binding	3	0	3	66	0.18745
CC	GO:0005746	mitochondrial respiratory chain	3	0	3	65	0.18769
BP	GO:0061564	axon development	5	3	8	242	0.18828
BP	GO:0043405	regulation of MAP kinase activity	1	5	6	169	0.18876
CC	GO:0005614	interstitial matrix	1	0	1	9	0.18882
CC	GO:0099144	anchored component of synaptic membrane	1	0	1	9	0.18882
BP	GO:0002833	positive regulation of response to biotic stimulus	0	2	2	35	0.18927
BP	GO:0014896	muscle hypertrophy	1	1	2	35	0.18927
BP	GO:0014897	striated muscle hypertrophy	1	1	2	35	0.18927
BP	GO:0060393	regulation of pathway-restricted SMAD protein phosphorylation	1	1	2	35	0.18927
BP	GO:0071715	icosanoid transport	2	0	2	35	0.18927
BP	GO:1901570	fatty acid derivative biosynthetic process	1	1	2	35	0.18927
BP	GO:1901571	fatty acid derivative transport	2	0	2	35	0.18927
BP	GO:0042445	hormone metabolic process	2	2	4	99	0.18931
BP	GO:0006865	amino acid transport	2	1	3	66	0.19025
BP	GO:0010595	positive regulation of endothelial cell migration	1	2	3	66	0.19025
BP	GO:0007017	microtubule-based process	8	7	15	511	0.19031
BP	GO:0043542	endothelial cell migration	2	3	5	134	0.19093
BP	GO:0002218	activation of innate immune response	2	2	4	100	0.19394
CC	GO:0042995	cell projection	16	9	25	905	0.19465
BP	GO:0045216	cell-cell junction organization	4	1	5	135	0.19488
BP	GO:0050663	cytokine secretion	1	4	5	135	0.19488
MF	GO:0003727	single-stranded RNA binding	0	2	2	36	0.19536
BP	GO:0001657	ureteric bud development	1	2	3	67	0.19606
BP	GO:0003158	endothelium development	3	0	3	67	0.19606
BP	GO:0072163	mesonephric epithelium development	1	2	3	67	0.19606
BP	GO:0072164	mesonephric tubule development	1	2	3	67	0.19606
BP	GO:0009880	embryonic pattern specification	2	0	2	36	0.19757
BP	GO:0030104	water homeostasis	0	2	2	36	0.19757
BP	GO:0031663	lipopolysaccharide-mediated signaling pathway	0	2	2	36	0.19757
BP	GO:0032330	regulation of chondrocyte differentiation	1	1	2	36	0.19757
BP	GO:0032963	collagen metabolic process	2	0	2	36	0.19757
BP	GO:0042310	vasoconstriction	1	1	2	36	0.19757
BP	GO:0044259	multicellular organismal macromolecule metabolic process	2	0	2	36	0.19757
BP	GO:0046605	regulation of centrosome cycle	1	1	2	36	0.19757
BP	GO:0046718	viral entry into host cell	1	1	2	36	0.19757
BP	GO:0072678	T cell migration	1	1	2	36	0.19757
BP	GO:1902041	regulation of extrinsic apoptotic signaling pathway via death domain receptors	1	1	2	36	0.19757
BP	GO:0019220	regulation of phosphate metabolic process	13	14	27	996	0.19778
BP	GO:0071772	response to BMP	3	1	4	101	0.19861
BP	GO:0071773	cellular response to BMP stimulus	3	1	4	101	0.19861
MF	GO:0004896	cytokine receptor activity	2	1	3	68	0.19898
BP	GO:0001822	kidney development	3	3	6	172	0.19922
MF	GO:0004866	endopeptidase inhibitor activity	3	1	4	102	0.19978
BP	GO:0045595	regulation of cell differentiation	17	9	26	958	0.20169
BP	GO:0001508	action potential	2	1	3	68	0.20191
BP	GO:0002040	sprouting angiogenesis	1	2	3	68	0.20191
BP	GO:0051174	regulation of phosphorus metabolic process	13	14	27	999	0.20211
BP	GO:0030258	lipid modification	5	0	5	137	0.20286
CC	GO:0044429	mitochondrial part	12	2	14	474	0.20294
MF	GO:0004180	carboxypeptidase activity	1	1	2	37	0.20363
MF	GO:0048029	monosaccharide binding	2	0	2	37	0.20363
MF	GO:0004143	diacylglycerol kinase activity	1	0	1	10	0.20449
MF	GO:0004745	retinol dehydrogenase activity	0	1	1	10	0.20449
MF	GO:0008191	metalloendopeptidase inhibitor activity	1	0	1	10	0.20449
MF	GO:0008301	DNA binding, bending	0	1	1	10	0.20449
MF	GO:0008556	potassium-transporting ATPase activity	0	1	1	10	0.20449
MF	GO:0016493	C-C chemokine receptor activity	1	0	1	10	0.20449
MF	GO:0038187	pattern recognition receptor activity	1	0	1	10	0.20449
MF	GO:0047429	nucleoside-triphosphate diphosphatase activity	0	1	1	10	0.20449
MF	GO:0022853	active ion transmembrane transporter activity	2	1	3	69	0.20481
BP	GO:0006793	phosphorus metabolic process	31	24	55	2164	0.20551
BP	GO:0051346	negative regulation of hydrolase activity	6	2	8	248	0.2057
BP	GO:0001501	skeletal system development	8	2	10	324	0.20581
BP	GO:0001973	adenosine receptor signaling pathway	1	0	1	10	0.20587
BP	GO:0002313	mature B cell differentiation involved in immune response	0	1	1	10	0.20587
BP	GO:0003417	growth plate cartilage development	1	0	1	10	0.20587
BP	GO:0006122	mitochondrial electron transport, ubiquinol to cytochrome c	1	0	1	10	0.20587
BP	GO:0006590	thyroid hormone generation	1	0	1	10	0.20587
BP	GO:0006656	phosphatidylcholine biosynthetic process	1	0	1	10	0.20587
BP	GO:0006691	leukotriene metabolic process	1	0	1	10	0.20587
BP	GO:0007100	mitotic centrosome separation	1	0	1	10	0.20587
BP	GO:0007250	activation of NF-kappaB-inducing kinase activity	0	1	1	10	0.20587
BP	GO:0007288	sperm axoneme assembly	1	0	1	10	0.20587
BP	GO:0009074	aromatic amino acid family catabolic process	1	0	1	10	0.20587
BP	GO:0010039	response to iron ion	1	0	1	10	0.20587
BP	GO:0010457	centriole-centriole cohesion	1	0	1	10	0.20587
BP	GO:0010885	regulation of cholesterol storage	1	0	1	10	0.20587
BP	GO:0014821	phasic smooth muscle contraction	0	1	1	10	0.20587
BP	GO:0014850	response to muscle activity	1	0	1	10	0.20587
BP	GO:0030238	male sex determination	0	1	1	10	0.20587
BP	GO:0033151	V(D)J recombination	0	1	1	10	0.20587
BP	GO:0033194	response to hydroperoxide	1	0	1	10	0.20587
BP	GO:0034331	cell junction maintenance	0	1	1	10	0.20587
BP	GO:0034587	piRNA metabolic process	0	1	1	10	0.20587
BP	GO:0036065	fucosylation	0	1	1	10	0.20587
BP	GO:0042574	retinal metabolic process	0	1	1	10	0.20587
BP	GO:0046597	negative regulation of viral entry into host cell	1	0	1	10	0.20587
BP	GO:0048012	hepatocyte growth factor receptor signaling pathway	1	0	1	10	0.20587
BP	GO:0048853	forebrain morphogenesis	1	0	1	10	0.20587
BP	GO:0050884	neuromuscular process controlling posture	1	0	1	10	0.20587
BP	GO:0051547	regulation of keratinocyte migration	1	0	1	10	0.20587
BP	GO:0051988	regulation of attachment of spindle microtubules to kinetochore	1	0	1	10	0.20587
BP	GO:0055091	phospholipid homeostasis	1	0	1	10	0.20587
BP	GO:0060008	Sertoli cell differentiation	0	1	1	10	0.20587
BP	GO:0060394	negative regulation of pathway-restricted SMAD protein phosphorylation	0	1	1	10	0.20587
BP	GO:0060644	mammary gland epithelial cell differentiation	0	1	1	10	0.20587
BP	GO:0070885	negative regulation of calcineurin-NFAT signaling cascade	1	0	1	10	0.20587
BP	GO:0070886	positive regulation of calcineurin-NFAT signaling cascade	1	0	1	10	0.20587
BP	GO:0071404	cellular response to low-density lipoprotein particle stimulus	1	0	1	10	0.20587
BP	GO:0071599	otic vesicle development	1	0	1	10	0.20587
BP	GO:0071605	monocyte chemotactic protein-1 production	1	0	1	10	0.20587
BP	GO:0071636	positive regulation of transforming growth factor beta production	0	1	1	10	0.20587
BP	GO:0071637	regulation of monocyte chemotactic protein-1 production	1	0	1	10	0.20587
BP	GO:0072643	interferon-gamma secretion	0	1	1	10	0.20587
BP	GO:0086013	membrane repolarization during cardiac muscle cell action potential	0	1	1	10	0.20587
BP	GO:0106057	negative regulation of calcineurin-mediated signaling	1	0	1	10	0.20587
BP	GO:0106058	positive regulation of calcineurin-mediated signaling	1	0	1	10	0.20587
BP	GO:1900025	negative regulation of substrate adhesion-dependent cell spreading	1	0	1	10	0.20587
BP	GO:1901385	regulation of voltage-gated calcium channel activity	1	0	1	10	0.20587
BP	GO:1905331	negative regulation of morphogenesis of an epithelium	1	0	1	10	0.20587
BP	GO:2000095	regulation of Wnt signaling pathway, planar cell polarity pathway	1	0	1	10	0.20587
BP	GO:2000402	negative regulation of lymphocyte migration	1	0	1	10	0.20587
BP	GO:2001028	positive regulation of endothelial cell chemotaxis	0	1	1	10	0.20587
BP	GO:2001204	regulation of osteoclast development	1	0	1	10	0.20587
BP	GO:0002028	regulation of sodium ion transport	1	1	2	37	0.20592
BP	GO:0030239	myofibril assembly	1	1	2	37	0.20592
BP	GO:0051145	smooth muscle cell differentiation	1	1	2	37	0.20592
BP	GO:0051893	regulation of focal adhesion assembly	2	0	2	37	0.20592
BP	GO:0060425	lung morphogenesis	2	0	2	37	0.20592
BP	GO:0090109	regulation of cell-substrate junction assembly	2	0	2	37	0.20592
BP	GO:0097756	negative regulation of blood vessel diameter	1	1	2	37	0.20592
BP	GO:0009991	response to extracellular stimulus	3	3	6	174	0.20631
BP	GO:0001763	morphogenesis of a branching structure	4	1	5	138	0.20689
BP	GO:0060348	bone development	4	1	5	138	0.20689
BP	GO:0048585	negative regulation of response to stimulus	13	12	25	921	0.2072
CC	GO:0030055	cell-substrate junction	2	2	4	102	0.20744
CC	GO:0000930	gamma-tubulin complex	1	0	1	10	0.20747
BP	GO:0048754	branching morphogenesis of an epithelial tube	3	1	4	103	0.20804
BP	GO:0031175	neuron projection development	11	3	14	481	0.20918
MF	GO:0022838	substrate-specific channel activity	5	5	10	328	0.20996
BP	GO:0030001	metal ion transport	10	5	15	521	0.2103
MF	GO:0008081	phosphoric diester hydrolase activity	2	1	3	70	0.21067
BP	GO:0048666	neuron development	11	5	16	561	0.21101
CC	GO:0016323	basolateral plasma membrane	2	2	4	103	0.21225
BP	GO:0031497	chromatin assembly	0	3	3	70	0.21373
BP	GO:0000079	regulation of cyclin-dependent protein serine/threonine kinase activity	2	0	2	38	0.2143
BP	GO:0032507	maintenance of protein location in cell	1	1	2	38	0.2143
BP	GO:0032663	regulation of interleukin-2 production	2	0	2	38	0.2143
BP	GO:0034766	negative regulation of ion transmembrane transport	1	1	2	38	0.2143
BP	GO:0046834	lipid phosphorylation	2	0	2	38	0.2143
BP	GO:0060688	regulation of morphogenesis of a branching structure	2	0	2	38	0.2143
BP	GO:1901796	regulation of signal transduction by p53 class mediator	1	1	2	38	0.2143
BP	GO:2001238	positive regulation of extrinsic apoptotic signaling pathway	0	2	2	38	0.2143
BP	GO:0052547	regulation of peptidase activity	6	2	8	251	0.21464
MF	GO:0005230	extracellular ligand-gated ion channel activity	1	2	3	71	0.21658
BP	GO:0021915	neural tube development	1	3	4	105	0.21759
CC	GO:0044455	mitochondrial membrane part	6	0	6	176	0.21896
BP	GO:0007399	nervous system development	20	11	31	1175	0.21928
BP	GO:0006950	response to stress	29	21	50	1967	0.21969
BP	GO:0006959	humoral immune response	2	1	3	71	0.2197
BP	GO:0030518	intracellular steroid hormone receptor signaling pathway	1	2	3	71	0.2197
MF	GO:0004129	cytochrome-c oxidase activity	2	0	2	39	0.22029
MF	GO:0015002	heme-copper terminal oxidase activity	2	0	2	39	0.22029
MF	GO:0016675	oxidoreductase activity, acting on a heme group of donors	2	0	2	39	0.22029
MF	GO:0016676	oxidoreductase activity, acting on a heme group of donors, oxygen as acceptor	2	0	2	39	0.22029
MF	GO:0004467	long-chain fatty acid-CoA ligase activity	0	1	1	11	0.22249
MF	GO:0004602	glutathione peroxidase activity	1	0	1	11	0.22249
MF	GO:0005452	inorganic anion exchanger activity	1	0	1	11	0.22249
MF	GO:0016722	oxidoreductase activity, oxidizing metal ions	1	0	1	11	0.22249
MF	GO:0035325	Toll-like receptor binding	1	0	1	11	0.22249
MF	GO:0046961	proton-transporting ATPase activity, rotational mechanism	1	0	1	11	0.22249
MF	GO:0140104	molecular carrier activity	1	0	1	11	0.22249
MF	GO:0005249	voltage-gated potassium channel activity	2	1	3	72	0.22251
BP	GO:0030260	entry into host cell	1	1	2	39	0.22272
BP	GO:0044409	entry into host	1	1	2	39	0.22272
BP	GO:0051806	entry into cell of other organism involved in symbiotic interaction	1	1	2	39	0.22272
BP	GO:0051828	entry into other organism involved in symbiotic interaction	1	1	2	39	0.22272
BP	GO:0060389	pathway-restricted SMAD protein phosphorylation	1	1	2	39	0.22272
MF	GO:0061135	endopeptidase regulator activity	3	1	4	107	0.22345
BP	GO:0045860	positive regulation of protein kinase activity	3	5	8	254	0.22373
BP	GO:0006336	DNA replication-independent nucleosome assembly	0	1	1	11	0.22397
BP	GO:0007216	G-protein coupled glutamate receptor signaling pathway	1	0	1	11	0.22397
BP	GO:0007252	I-kappaB phosphorylation	0	1	1	11	0.22397
BP	GO:0009200	deoxyribonucleoside triphosphate metabolic process	0	1	1	11	0.22397
BP	GO:0017121	phospholipid scrambling	1	0	1	11	0.22397
BP	GO:0034724	DNA replication-independent nucleosome organization	0	1	1	11	0.22397
BP	GO:0035094	response to nicotine	1	0	1	11	0.22397
BP	GO:0035313	wound healing, spreading of epidermal cells	1	0	1	11	0.22397
BP	GO:0035728	response to hepatocyte growth factor	1	0	1	11	0.22397
BP	GO:0035729	cellular response to hepatocyte growth factor stimulus	1	0	1	11	0.22397
BP	GO:0035994	response to muscle stretch	0	1	1	11	0.22397
BP	GO:0036336	dendritic cell migration	0	1	1	11	0.22397
BP	GO:0038093	Fc receptor signaling pathway	0	1	1	11	0.22397
BP	GO:0039535	regulation of RIG-I signaling pathway	0	1	1	11	0.22397
BP	GO:0042220	response to cocaine	1	0	1	11	0.22397
BP	GO:0043031	negative regulation of macrophage activation	1	0	1	11	0.22397
BP	GO:0043517	positive regulation of DNA damage response, signal transduction by p53 class mediator	0	1	1	11	0.22397
BP	GO:0045589	regulation of regulatory T cell differentiation	1	0	1	11	0.22397
BP	GO:0046479	glycosphingolipid catabolic process	0	1	1	11	0.22397
BP	GO:0046607	positive regulation of centrosome cycle	0	1	1	11	0.22397
BP	GO:0046688	response to copper ion	0	1	1	11	0.22397
BP	GO:0048268	clathrin coat assembly	1	0	1	11	0.22397
BP	GO:0050908	detection of light stimulus involved in visual perception	0	1	1	11	0.22397
BP	GO:0050962	detection of light stimulus involved in sensory perception	0	1	1	11	0.22397
BP	GO:0051299	centrosome separation	1	0	1	11	0.22397
BP	GO:0051930	regulation of sensory perception of pain	1	0	1	11	0.22397
BP	GO:0051931	regulation of sensory perception	1	0	1	11	0.22397
BP	GO:0060391	positive regulation of SMAD protein import into nucleus	1	0	1	11	0.22397
BP	GO:0070050	neuron cellular homeostasis	1	0	1	11	0.22397
BP	GO:0071071	regulation of phospholipid biosynthetic process	1	0	1	11	0.22397
BP	GO:0071157	negative regulation of cell cycle arrest	1	0	1	11	0.22397
BP	GO:0071243	cellular response to arsenic-containing substance	1	0	1	11	0.22397
BP	GO:0071875	adrenergic receptor signaling pathway	1	0	1	11	0.22397
BP	GO:0072079	nephron tubule formation	1	0	1	11	0.22397
BP	GO:0086011	membrane repolarization during action potential	0	1	1	11	0.22397
BP	GO:0090042	tubulin deacetylation	1	0	1	11	0.22397
BP	GO:0098856	intestinal lipid absorption	1	0	1	11	0.22397
BP	GO:1903019	negative regulation of glycoprotein metabolic process	1	0	1	11	0.22397
BP	GO:1903959	regulation of anion transmembrane transport	0	1	1	11	0.22397
BP	GO:1904037	positive regulation of epithelial cell apoptotic process	0	1	1	11	0.22397
BP	GO:1904861	excitatory synapse assembly	1	0	1	11	0.22397
BP	GO:1904862	inhibitory synapse assembly	0	1	1	11	0.22397
BP	GO:1990000	amyloid fibril formation	1	0	1	11	0.22397
BP	GO:2000052	positive regulation of non-canonical Wnt signaling pathway	1	0	1	11	0.22397
BP	GO:2000463	positive regulation of excitatory postsynaptic potential	1	0	1	11	0.22397
BP	GO:0051235	maintenance of location	4	2	6	179	0.22441
BP	GO:0060070	canonical Wnt signaling pathway	5	1	6	179	0.22441
CC	GO:0120025	plasma membrane bounded cell projection	15	9	24	884	0.22499
CC	GO:0030286	dynein complex	0	2	2	39	0.22555
CC	GO:1902554	serine/threonine protein kinase complex	2	0	2	39	0.22555
CC	GO:0031091	platelet alpha granule	0	1	1	11	0.22569
CC	GO:0032426	stereocilium tip	1	0	1	11	0.22569
CC	GO:0033180	proton-transporting V-type ATPase, V1 domain	1	0	1	11	0.22569
BP	GO:0008584	male gonad development	1	2	3	72	0.2257
BP	GO:0017156	calcium ion regulated exocytosis	1	2	3	72	0.2257
BP	GO:0046546	development of primary male sexual characteristics	1	2	3	72	0.2257
BP	GO:0051493	regulation of cytoskeleton organization	4	6	10	332	0.22682
BP	GO:0031399	regulation of protein modification process	12	16	28	1057	0.22738
BP	GO:0065003	macromolecular complex assembly	14	12	26	975	0.22762
MF	GO:0003714	transcription corepressor activity	1	3	4	108	0.22827
MF	GO:0030674	protein binding, bridging	3	0	3	73	0.22848
MF	GO:0005507	copper ion binding	2	0	2	40	0.22866
BP	GO:0045087	innate immune response	5	4	9	294	0.22872
BP	GO:0007193	adenylate cyclase-inhibiting G-protein coupled receptor signaling pathway	1	1	2	40	0.23116
BP	GO:0050710	negative regulation of cytokine secretion	0	2	2	40	0.23116
BP	GO:0060350	endochondral bone morphogenesis	1	1	2	40	0.23116
BP	GO:1901863	positive regulation of muscle tissue development	1	1	2	40	0.23116
BP	GO:1904029	regulation of cyclin-dependent protein kinase activity	2	0	2	40	0.23116
BP	GO:0042303	molting cycle	3	0	3	73	0.23173
BP	GO:0042633	hair cycle	3	0	3	73	0.23173
BP	GO:0001505	regulation of neurotransmitter levels	2	2	4	108	0.23214
BP	GO:0006814	sodium ion transport	3	1	4	108	0.23214
BP	GO:0050792	regulation of viral process	1	3	4	108	0.23214
BP	GO:0060249	anatomical structure homeostasis	5	2	7	219	0.23324
CC	GO:0031902	late endosome membrane	1	1	2	40	0.23408
BP	GO:0071407	cellular response to organic cyclic compound	3	6	9	296	0.23447
BP	GO:0001558	regulation of cell growth	3	3	6	182	0.23551
MF	GO:0008009	chemokine activity	1	1	2	41	0.23705
BP	GO:0051321	meiotic cell cycle	3	1	4	109	0.23705
BP	GO:0002761	regulation of myeloid leukocyte differentiation	2	1	3	74	0.23779
BP	GO:0007009	plasma membrane organization	3	0	3	74	0.23779
MF	GO:0015079	potassium ion transmembrane transporter activity	2	2	4	110	0.23798
BP	GO:0034763	negative regulation of transmembrane transport	1	1	2	41	0.23962
BP	GO:0044070	regulation of anion transport	1	1	2	41	0.23962
BP	GO:0071496	cellular response to external stimulus	2	3	5	146	0.24001
MF	GO:0000400	four-way junction DNA binding	0	1	1	12	0.24009
MF	GO:0004529	exodeoxyribonuclease activity	0	1	1	12	0.24009
MF	GO:0005545	1-phosphatidylinositol binding	1	0	1	12	0.24009
MF	GO:0016500	protein-hormone receptor activity	1	0	1	12	0.24009
MF	GO:0016895	exodeoxyribonuclease activity, producing 5'-phosphomonoesters	0	1	1	12	0.24009
MF	GO:0016922	ligand-dependent nuclear receptor binding	1	0	1	12	0.24009
MF	GO:0030228	lipoprotein particle receptor activity	1	0	1	12	0.24009
MF	GO:0071837	HMG box domain binding	1	0	1	12	0.24009
MF	GO:0140103	catalytic activity, acting on a glycoprotein	0	1	1	12	0.24009
BP	GO:0006508	proteolysis	21	10	31	1190	0.24089
BP	GO:0071345	cellular response to cytokine stimulus	5	7	12	416	0.24107
BP	GO:0000729	DNA double-strand break processing	0	1	1	12	0.24166
BP	GO:0002577	regulation of antigen processing and presentation	0	1	1	12	0.24166
BP	GO:0003181	atrioventricular valve morphogenesis	0	1	1	12	0.24166
BP	GO:0006195	purine nucleotide catabolic process	0	1	1	12	0.24166
[truncated: 2,546 more rows]
