# Supplementary material for: Coprophagy Prevention Affects the Reproductive Performance in New Zealand White Rabbits Is Mediated through Nox4-ROS-NFκB Pathway
Source: Oxid Med Cell Longev. 2022 Dec 21;2022:8999899. doi: 10.1155/2022/8999899 (PMC11401658; doi:10.1155/2022/8999899)
Supplement: Supplementary Materials — Supplementary Figure S1: quality and accuracy analysis of transcriptome sequencing data. (A) Expression patterns of all genes in the sample. (B) Correlation of gene expression levels between samples. (C) Principal component analysis results of all samples. Supplementary Figure S2: verification of the accuracy of transcriptome sequencing results. (A) RT-qPCR results. (B) Differential multiples of gene expression in transcriptome sequencing. Supplementary Table S1: the diet composition of rabbits. Supplementary Table S2: the primers for RT-qPCR. Supplementary Table S3: RT-qPCR system and procedure. Supplementary Table S4: transcriptome sequencing data output report. Supplementary Table S5: analysis of differentially expressed genes. Supplementary Table S6: enrichment analysis of GO Terms. Supplementary Table S7: enrichment analysis of KEGG metabolic pathway. [file 8999899.f1.zip › Supplementary Table S7.txt]

PathwayID	Pathway	Level1	Level2	Up_number	Down_number	DEG_number	total_number	Pvalue	Up_gene	Down_gene	URL
ocu05032	Morphine addiction	Human Diseases	Substance dependence	4	3	7	70	0.000971824	ENSOCUG00000007904(ADCY9),ENSOCUG00000027343,ENSOCUG00000009113(PDE1C),ENSOCUG00000008038	ENSOCUG00000008191(GABRP),ENSOCUG00000003638(GABRB3),ENSOCUG00000015565(KCNJ5)	http://www.kegg.jp/kegg-bin/show_pathway?map05032/K04999%09%23FFFFFF,green/K13755%09%23FFFFFF,red/K05189%09%23FFFFFF,green/K08049%09%23FFFFFF,red/K05181%09%23FFFFFF,purple/K13298%09%23FFFFFF,red/
ocu04514	Cell adhesion molecules (CAMs)	Environmental Information Processing	Signaling molecules and interaction	6	2	8	104	0.002380915	ENSOCUG00000016385(CADM3),ENSOCUG00000008285(NEGR1),ENSOCUG00000010458(NECTIN1),ENSOCUG00000009395(CNTN1),ENSOCUG00000007327(CNTNAP1),ENSOCUG00000001102(L1CAM)	ENSOCUG00000011464(CLDN1),ENSOCUG00000006190(NCAM1)	http://www.kegg.jp/kegg-bin/show_pathway?map04514/K06550%09%23FFFFFF,red/K07379%09%23FFFFFF,red/K06491%09%23FFFFFF,green/K06081%09%23FFFFFF,red/K06780%09%23FFFFFF,red/K06087%09%23FFFFFF,green/K06759%09%23FFFFFF,red/K06775%09%23FFFFFF,red/
ocu04350	TGF-beta signaling pathway	Environmental Information Processing	Signal transduction	1	2	3	60	0.015318742	ENSOCUG00000012890	ENSOCUG00000023218,ENSOCUG00000003792(THBS1)	http://www.kegg.jp/kegg-bin/show_pathway?map04350/K04682%09%23FFFFFF,red/K04668%09%23FFFFFF,green/K16857%09%23FFFFFF,green/
ocu04512	ECM-receptor interaction	Environmental Information Processing	Signaling molecules and interaction	1	4	5	67	0.017399009	ENSOCUG00000002492(CD36)	ENSOCUG00000004013(LAMB3),ENSOCUG00000003894(SV2A),ENSOCUG00000003792(THBS1),ENSOCUG00000022536(SPP1)	http://www.kegg.jp/kegg-bin/show_pathway?map04512/K06258%09%23FFFFFF,green/K06244%09%23FFFFFF,green/K06259%09%23FFFFFF,red/K16857%09%23FFFFFF,green/K06250%09%23FFFFFF,green/
ocu04015	Rap1 signaling pathway	Environmental Information Processing	Signal transduction	4	4	8	151	0.017976569	ENSOCUG00000007904(ADCY9),ENSOCUG00000008499(FGF10),ENSOCUG00000016581,ENSOCUG00000024485(RAP1GAP)	ENSOCUG00000013064(TLN2),ENSOCUG00000007086(KIT),ENSOCUG00000003792(THBS1),ENSOCUG00000011124(FGF18)	http://www.kegg.jp/kegg-bin/show_pathway?map04015/K04358%09%23FFFFFF,purple/K08049%09%23FFFFFF,red/K05091%09%23FFFFFF,green/K16857%09%23FFFFFF,green/K06271%09%23FFFFFF,green/K07834%09%23FFFFFF,red/K17700%09%23FFFFFF,red/
ocu00603	Glycosphingolipid biosynthesis - globo and isoglobo series	Metabolism	Glycan biosynthesis and metabolism	0	2	2	11	0.01837536	-	ENSOCUG00000027963,ENSOCUG00000013134(ST8SIA1)	http://www.kegg.jp/kegg-bin/show_pathway?map00603/K00718%09%23FFFFFF,green/K03371%09%23FFFFFF,green/
ocu05033	Nicotine addiction	Human Diseases	Substance dependence	1	2	3	31	0.018720209	ENSOCUG00000027343	ENSOCUG00000008191(GABRP),ENSOCUG00000003638(GABRB3)	http://www.kegg.jp/kegg-bin/show_pathway?map05033/K05189%09%23FFFFFF,green/K05181%09%23FFFFFF,purple/
ocu04978	Mineral absorption	Organismal Systems	Digestive system	2	1	3	31	0.018820919	ENSOCUG00000010633(HMOX1),ENSOCUG00000007551(TRPV6)	ENSOCUG00000022624(SLC26A9)	http://www.kegg.jp/kegg-bin/show_pathway?map04978/K14706%09%23FFFFFF,green/K00510%09%23FFFFFF,red/K04975%09%23FFFFFF,red/
ocu04976	Bile secretion	Organismal Systems	Digestive system	4	0	4	54	0.019215222	ENSOCUG00000007710(SCTR),ENSOCUG00000000119(SLC51A),ENSOCUG00000007904(ADCY9),ENSOCUG00000006500(SLC4A4)	-	http://www.kegg.jp/kegg-bin/show_pathway?map04976/K04588%09%23FFFFFF,red/K14360%09%23FFFFFF,red/K13575%09%23FFFFFF,red/K08049%09%23FFFFFF,red/
ocu04657	IL-17 signaling pathway	Organismal Systems	Immune system	1	2	3	67	0.019222532	ENSOCUG00000021002(LCN2)	ENSOCUG00000005311(IL17RE),ENSOCUG00000013016(MAPK4)	http://www.kegg.jp/kegg-bin/show_pathway?map04657/K21129%09%23FFFFFF,red/K05168%09%23FFFFFF,green/K06855%09%23FFFFFF,green/
ocu03320	PPAR signaling pathway	Organismal Systems	Endocrine system	2	2	4	55	0.019342122	ENSOCUG00000014608(FABP3),ENSOCUG00000002492(CD36)	ENSOCUG00000024977(ACSBG1),ENSOCUG00000013023	http://www.kegg.jp/kegg-bin/show_pathway?map03320/K06259%09%23FFFFFF,red/K00864%09%23FFFFFF,green/K15013%09%23FFFFFF,green/K08752%09%23FFFFFF,red/
ocu00601	Glycosphingolipid biosynthesis - lacto and neolacto series	Metabolism	Glycan biosynthesis and metabolism	0	2	2	16	0.019510202	-	ENSOCUG00000027963,ENSOCUG00000013134(ST8SIA1)	http://www.kegg.jp/kegg-bin/show_pathway?map00601/K00718%09%23FFFFFF,green/K03371%09%23FFFFFF,green/
ocu04727	GABAergic synapse	Organismal Systems	Nervous system	2	2	4	68	0.019579723	ENSOCUG00000007904(ADCY9),ENSOCUG00000027343	ENSOCUG00000008191(GABRP),ENSOCUG00000003638(GABRB3)	http://www.kegg.jp/kegg-bin/show_pathway?map04727/K05189%09%23FFFFFF,green/K08049%09%23FFFFFF,red/K05181%09%23FFFFFF,purple/
ocu05165	Human papillomavirus infection	Human Diseases	Infectious diseases: Viral	4	5	9	234	0.021044695	ENSOCUG00000013432(WNT7A),ENSOCUG00000015260(TUBG1),ENSOCUG00000024007(WNT6),ENSOCUG00000016298(ATP6V1H)	ENSOCUG00000029637,ENSOCUG00000004013(LAMB3),ENSOCUG00000003792(THBS1),ENSOCUG00000029328(OASL),ENSOCUG00000022536(SPP1)	http://www.kegg.jp/kegg-bin/show_pathway?map05165/K06244%09%23FFFFFF,green/K10389%09%23FFFFFF,red/K16857%09%23FFFFFF,green/K00572%09%23FFFFFF,red/K14608%09%23FFFFFF,green/K00445%09%23FFFFFF,red/K02144%09%23FFFFFF,red/K06250%09%23FFFFFF,green/
ocu04723	Retrograde endocannabinoid signaling	Organismal Systems	Nervous system	2	3	5	99	0.022959667	ENSOCUG00000007904(ADCY9),ENSOCUG00000027343	ENSOCUG00000008191(GABRP),ENSOCUG00000003638(GABRB3),ENSOCUG00000015565(KCNJ5)	http://www.kegg.jp/kegg-bin/show_pathway?map04723/K04999%09%23FFFFFF,green/K05189%09%23FFFFFF,green/K08049%09%23FFFFFF,red/K05181%09%23FFFFFF,purple/
ocu00830	Retinol metabolism	Metabolism	Metabolism of cofactors and vitamins	2	1	3	44	0.02644077	ENSOCUG00000013971(AOX1),ENSOCUG00000004655	ENSOCUG00000016942(ALDH1A2)	http://www.kegg.jp/kegg-bin/show_pathway?map00830/K07249%09%23FFFFFF,green/K00157%09%23FFFFFF,red/K07412%09%23FFFFFF,red/
ocu05224	Breast cancer	Human Diseases	Cancers: Specific types	3	2	5	102	0.030604971	ENSOCUG00000013432(WNT7A),ENSOCUG00000024007(WNT6),ENSOCUG00000008499(FGF10)	ENSOCUG00000007086(KIT),ENSOCUG00000011124(FGF18)	http://www.kegg.jp/kegg-bin/show_pathway?map05224/K00572%09%23FFFFFF,red/K04358%09%23FFFFFF,purple/K00445%09%23FFFFFF,red/K05091%09%23FFFFFF,green/
ocu04150	mTOR signaling pathway	Environmental Information Processing	Signal transduction	4	0	4	120	0.038637834	ENSOCUG00000013432(WNT7A),ENSOCUG00000024007(WNT6),ENSOCUG00000016298(ATP6V1H),ENSOCUG00000014367(SGK1)	-	http://www.kegg.jp/kegg-bin/show_pathway?map04150/K13302%09%23FFFFFF,red/K00572%09%23FFFFFF,red/K00445%09%23FFFFFF,red/K02144%09%23FFFFFF,red/
ocu00232	Caffeine metabolism	Metabolism	Biosynthesis of other secondary metabolites	1	0	1	4	0.087253834	ENSOCUG00000001230(XDH)	-	http://www.kegg.jp/kegg-bin/show_pathway?map00232/K00106%09%23FFFFFF,red/
ocu04072	Phospholipase D signaling pathway	Environmental Information Processing	Signal transduction	4	1	5	105	0.088661556	ENSOCUG00000007904(ADCY9),ENSOCUG00000015811(PIP5K1B),ENSOCUG00000005238(DGKG),ENSOCUG00000016581	ENSOCUG00000007086(KIT)	http://www.kegg.jp/kegg-bin/show_pathway?map04072/K08049%09%23FFFFFF,red/K00901%09%23FFFFFF,red/K05091%09%23FFFFFF,green/K00889%09%23FFFFFF,red/K07834%09%23FFFFFF,red/
ocu05206	MicroRNAs in cancer	Human Diseases	Cancers: Overview	2	3	5	109	0.100029938	ENSOCUG00000010633(HMOX1),ENSOCUG00000016787(SERPINB5)	ENSOCUG00000008012,ENSOCUG00000003792(THBS1),ENSOCUG00000006493	http://www.kegg.jp/kegg-bin/show_pathway?map05206/K04381%09%23FFFFFF,green/K10139%09%23FFFFFF,red/K16857%09%23FFFFFF,green/K00510%09%23FFFFFF,red/
ocu00750	Vitamin B6 metabolism	Metabolism	Metabolism of cofactors and vitamins	1	0	1	5	0.107855924	ENSOCUG00000013971(AOX1)	-	http://www.kegg.jp/kegg-bin/show_pathway?map00750/K00157%09%23FFFFFF,red/
ocu00400	Phenylalanine, tyrosine and tryptophan biosynthesis	Metabolism	Amino acid metabolism	1	0	1	5	0.107855924	ENSOCUG00000014890(PAH)	-	http://www.kegg.jp/kegg-bin/show_pathway?map00400/K00500%09%23FFFFFF,red/
ocu04916	Melanogenesis	Organismal Systems	Endocrine system	3	2	5	71	0.118232142	ENSOCUG00000013432(WNT7A),ENSOCUG00000024007(WNT6),ENSOCUG00000007904(ADCY9)	ENSOCUG00000007086(KIT),ENSOCUG00000013396(EDN1)	http://www.kegg.jp/kegg-bin/show_pathway?map04916/K00572%09%23FFFFFF,red/K16366%09%23FFFFFF,green/K00445%09%23FFFFFF,red/K08049%09%23FFFFFF,red/K05091%09%23FFFFFF,green/
ocu04920	Adipocytokine signaling pathway	Organismal Systems	Endocrine system	2	1	3	54	0.122058502	ENSOCUG00000002492(CD36),ENSOCUG00000014668(PPARGC1A)	ENSOCUG00000024977(ACSBG1)	http://www.kegg.jp/kegg-bin/show_pathway?map04920/K07202%09%23FFFFFF,red/K06259%09%23FFFFFF,red/K15013%09%23FFFFFF,green/
ocu04961	Endocrine and other factor-regulated calcium reabsorption	Organismal Systems	Excretory system	2	0	2	28	0.13083375	ENSOCUG00000007904(ADCY9),ENSOCUG00000014828(BDKRB2)	-	http://www.kegg.jp/kegg-bin/show_pathway?map04961/K08049%09%23FFFFFF,red/K03916%09%23FFFFFF,red/
ocu00250	Alanine, aspartate and glutamate metabolism	Metabolism	Amino acid metabolism	2	0	2	28	0.13083375	ENSOCUG00000015621(GPT2),ENSOCUG00000016591(GFPT2)	-	http://www.kegg.jp/kegg-bin/show_pathway?map00250/K00820%09%23FFFFFF,red/K00814%09%23FFFFFF,red/
ocu04610	Complement and coagulation cascades	Organismal Systems	Immune system	3	0	3	56	0.132160058	ENSOCUG00000014468(C1S),ENSOCUG00000014828(BDKRB2),ENSOCUG00000014373	-	http://www.kegg.jp/kegg-bin/show_pathway?map04610/K04002%09%23FFFFFF,red/K01331%09%23FFFFFF,red/K03916%09%23FFFFFF,red/
ocu04726	Serotonergic synapse	Organismal Systems	Nervous system	2	2	4	88	0.137346433	ENSOCUG00000008267(CYP4X1),ENSOCUG00000027343	ENSOCUG00000003638(GABRB3),ENSOCUG00000015565(KCNJ5)	http://www.kegg.jp/kegg-bin/show_pathway?map04726/K04999%09%23FFFFFF,green/K07428%09%23FFFFFF,red/K05181%09%23FFFFFF,purple/
ocu05144	Malaria	Human Diseases	Infectious diseases: Parasitic	1	1	2	32	0.162174854	ENSOCUG00000002492(CD36)	ENSOCUG00000003792(THBS1)	http://www.kegg.jp/kegg-bin/show_pathway?map05144/K06259%09%23FFFFFF,red/K16857%09%23FFFFFF,green/
ocu04360	Axon guidance	Organismal Systems	Development	2	3	5	130	0.170422474	ENSOCUG00000013815(SEMA6A),ENSOCUG00000001102(L1CAM)	ENSOCUG00000017302(SLIT3),ENSOCUG00000006139(SEMA5B),ENSOCUG00000004278(ROBO2)	http://www.kegg.jp/kegg-bin/show_pathway?map04360/K06550%09%23FFFFFF,red/K06754%09%23FFFFFF,green/K06841%09%23FFFFFF,green/K06842%09%23FFFFFF,red/K06850%09%23FFFFFF,green/
ocu04934	Cushing's syndrome	Human Diseases	Endocrine and metabolic diseases	4	0	4	103	0.203182648	ENSOCUG00000013432(WNT7A),ENSOCUG00000024007(WNT6),ENSOCUG00000007904(ADCY9),ENSOCUG00000008038	-	http://www.kegg.jp/kegg-bin/show_pathway?map04934/K00572%09%23FFFFFF,red/K00445%09%23FFFFFF,red/K08049%09%23FFFFFF,red/K13298%09%23FFFFFF,red/
ocu04080	Neuroactive ligand-receptor interaction	Environmental Information Processing	Signaling molecules and interaction	4	3	7	213	0.206212345	ENSOCUG00000007710(SCTR),ENSOCUG00000007797(CCKBR),ENSOCUG00000014828(BDKRB2),ENSOCUG00000027343	ENSOCUG00000008191(GABRP),ENSOCUG00000003638(GABRB3),ENSOCUG00000003473(VIPR2)	http://www.kegg.jp/kegg-bin/show_pathway?map04080/K04590%09%23FFFFFF,green/K04588%09%23FFFFFF,red/K05189%09%23FFFFFF,green/K04195%09%23FFFFFF,red/K03916%09%23FFFFFF,red/K05181%09%23FFFFFF,purple/
ocu05226	Gastric cancer	Human Diseases	Cancers: Specific types	3	1	4	104	0.207872723	ENSOCUG00000013432(WNT7A),ENSOCUG00000024007(WNT6),ENSOCUG00000008499(FGF10)	ENSOCUG00000011124(FGF18)	http://www.kegg.jp/kegg-bin/show_pathway?map05226/K00572%09%23FFFFFF,red/K04358%09%23FFFFFF,purple/K00445%09%23FFFFFF,red/
ocu00061	Fatty acid biosynthesis	Metabolism	Lipid metabolism	0	1	1	11	0.222100242	-	ENSOCUG00000024977(ACSBG1)	http://www.kegg.jp/kegg-bin/show_pathway?map00061/K15013%09%23FFFFFF,green/
ocu00360	Phenylalanine metabolism	Metabolism	Amino acid metabolism	1	0	1	11	0.222100242	ENSOCUG00000014890(PAH)	-	http://www.kegg.jp/kegg-bin/show_pathway?map00360/K00500%09%23FFFFFF,red/
ocu00230	Purine metabolism	Metabolism	Nucleotide metabolism	4	0	4	109	0.23176755	ENSOCUG00000007904(ADCY9),ENSOCUG00000001230(XDH),ENSOCUG00000009113(PDE1C),ENSOCUG00000008038	-	http://www.kegg.jp/kegg-bin/show_pathway?map00230/K13755%09%23FFFFFF,red/K08049%09%23FFFFFF,red/K00106%09%23FFFFFF,red/K13298%09%23FFFFFF,red/
ocu04974	Protein digestion and absorption	Organismal Systems	Digestive system	2	1	3	74	0.233419471	ENSOCUG00000003049(COL17A1),ENSOCUG00000000098(SLC16A10)	ENSOCUG00000001188	http://www.kegg.jp/kegg-bin/show_pathway?map04974/K19479%09%23FFFFFF,green/K07603%09%23FFFFFF,red/K08187%09%23FFFFFF,red/
ocu00604	Glycosphingolipid biosynthesis - ganglio series	Metabolism	Glycan biosynthesis and metabolism	0	1	1	12	0.239671034	-	ENSOCUG00000013134(ST8SIA1)	http://www.kegg.jp/kegg-bin/show_pathway?map00604/K03371%09%23FFFFFF,green/
ocu00430	Taurine and hypotaurine metabolism	Metabolism	Metabolism of other amino acids	1	0	1	12	0.239671034	ENSOCUG00000012233(GGT5)	-	http://www.kegg.jp/kegg-bin/show_pathway?map00430/K18592%09%23FFFFFF,red/
ocu04145	Phagosome	Cellular Processes	Transport and catabolism	3	1	4	111	0.241511551	ENSOCUG00000010890,ENSOCUG00000016298(ATP6V1H),ENSOCUG00000002492(CD36)	ENSOCUG00000003792(THBS1)	http://www.kegg.jp/kegg-bin/show_pathway?map04145/K06563%09%23FFFFFF,red/K06259%09%23FFFFFF,red/K16857%09%23FFFFFF,green/K02144%09%23FFFFFF,red/
ocu03010	Ribosome	Genetic Information Processing	Translation	0	5	5	148	0.242231444	-	ENSOCUG00000021439,ENSOCUG00000023327,ENSOCUG00000022735,ENSOCUG00000022043,ENSOCUG00000024479	http://www.kegg.jp/kegg-bin/show_pathway?map03010/K02924%09%23FFFFFF,green/K02877%09%23FFFFFF,green/K02978%09%23FFFFFF,green/K02912%09%23FFFFFF,green/K02891%09%23FFFFFF,green/
ocu05200	Pathways in cancer	Human Diseases	Cancers: Overview	8	3	11	386	0.255394336	ENSOCUG00000013432(WNT7A),ENSOCUG00000024007(WNT6),ENSOCUG00000007904(ADCY9),ENSOCUG00000010633(HMOX1),ENSOCUG00000014828(BDKRB2),ENSOCUG00000008499(FGF10),ENSOCUG00000006248,ENSOCUG00000016581	ENSOCUG00000004013(LAMB3),ENSOCUG00000007086(KIT),ENSOCUG00000011124(FGF18)	http://www.kegg.jp/kegg-bin/show_pathway?map05200/K06244%09%23FFFFFF,green/K05091%09%23FFFFFF,green/K03916%09%23FFFFFF,red/K00572%09%23FFFFFF,red/K04358%09%23FFFFFF,purple/K00445%09%23FFFFFF,red/K08049%09%23FFFFFF,red/K05074%09%23FFFFFF,red/K00510%09%23FFFFFF,red/K07834%09%23FFFFFF,red/
ocu04972	Pancreatic secretion	Organismal Systems	Digestive system	3	0	3	80	0.269864394	ENSOCUG00000007710(SCTR),ENSOCUG00000007904(ADCY9),ENSOCUG00000006500(SLC4A4)	-	http://www.kegg.jp/kegg-bin/show_pathway?map04972/K04588%09%23FFFFFF,red/K13575%09%23FFFFFF,red/K08049%09%23FFFFFF,red/
ocu05217	Basal cell carcinoma	Human Diseases	Cancers: Specific types	2	0	2	45	0.269915387	ENSOCUG00000013432(WNT7A),ENSOCUG00000024007(WNT6)	-	http://www.kegg.jp/kegg-bin/show_pathway?map05217/K00572%09%23FFFFFF,red/K00445%09%23FFFFFF,red/
ocu04927	Cortisol synthesis and secretion	Organismal Systems	Endocrine system	1	1	2	45	0.269915387	ENSOCUG00000007904(ADCY9)	ENSOCUG00000000026(NR0B1)	http://www.kegg.jp/kegg-bin/show_pathway?map04927/K08049%09%23FFFFFF,red/K08562%09%23FFFFFF,green/
ocu04970	Salivary secretion	Organismal Systems	Digestive system	2	0	2	45	0.269915387	ENSOCUG00000007904(ADCY9),ENSOCUG00000007551(TRPV6)	-	http://www.kegg.jp/kegg-bin/show_pathway?map04970/K08049%09%23FFFFFF,red/K04975%09%23FFFFFF,red/
ocu04742	Taste transduction	Organismal Systems	Sensory system	2	0	2	45	0.269915387	ENSOCUG00000005623(SCN9A),ENSOCUG00000009113(PDE1C)	-	http://www.kegg.jp/kegg-bin/show_pathway?map04742/K13755%09%23FFFFFF,red/K04841%09%23FFFFFF,red/
ocu00220	Arginine biosynthesis	Metabolism	Amino acid metabolism	1	0	1	14	0.273636022	ENSOCUG00000015621(GPT2)	-	http://www.kegg.jp/kegg-bin/show_pathway?map00220/K00814%09%23FFFFFF,red/
ocu04950	Maturity onset diabetes of the young	Human Diseases	Endocrine and metabolic diseases	1	0	1	14	0.273636022	ENSOCUG00000016719	-	http://www.kegg.jp/kegg-bin/show_pathway?map04950/K08024%09%23FFFFFF,red/
ocu05162	Measles	Human Diseases	Infectious diseases: Viral	1	2	3	81	0.27600642	ENSOCUG00000010890	ENSOCUG00000027849(OAS3),ENSOCUG00000002863(IFIH1)	http://www.kegg.jp/kegg-bin/show_pathway?map05162/K06563%09%23FFFFFF,red/K14216%09%23FFFFFF,green/K12647%09%23FFFFFF,green/
ocu04931	Insulin resistance	Human Diseases	Endocrine and metabolic diseases	3	0	3	81	0.27600642	ENSOCUG00000016591(GFPT2),ENSOCUG00000002492(CD36),ENSOCUG00000014668(PPARGC1A)	-	http://www.kegg.jp/kegg-bin/show_pathway?map04931/K00820%09%23FFFFFF,red/K07202%09%23FFFFFF,red/K06259%09%23FFFFFF,red/
ocu00561	Glycerolipid metabolism	Metabolism	Lipid metabolism	1	1	2	49	0.303510438	ENSOCUG00000005238(DGKG)	ENSOCUG00000013023	http://www.kegg.jp/kegg-bin/show_pathway?map00561/K00901%09%23FFFFFF,red/K00864%09%23FFFFFF,green/
ocu05218	Melanoma	Human Diseases	Cancers: Specific types	1	1	2	50	0.311874346	ENSOCUG00000008499(FGF10)	ENSOCUG00000011124(FGF18)	http://www.kegg.jp/kegg-bin/show_pathway?map05218/K04358%09%23FFFFFF,purple/
ocu04964	Proximal tubule bicarbonate reclamation	Organismal Systems	Excretory system	1	0	1	17	0.321771794	ENSOCUG00000006500(SLC4A4)	-	http://www.kegg.jp/kegg-bin/show_pathway?map04964/K13575%09%23FFFFFF,red/
ocu04020	Calcium signaling pathway	Environmental Information Processing	Signal transduction	4	0	4	127	0.322062757	ENSOCUG00000007904(ADCY9),ENSOCUG00000007797(CCKBR),ENSOCUG00000014828(BDKRB2),ENSOCUG00000009113(PDE1C)	-	http://www.kegg.jp/kegg-bin/show_pathway?map04020/K13755%09%23FFFFFF,red/K08049%09%23FFFFFF,red/K04195%09%23FFFFFF,red/K03916%09%23FFFFFF,red/
ocu05204	Chemical carcinogenesis	Human Diseases	Cancers: Overview	2	0	2	52	0.328535519	ENSOCUG00000001536,ENSOCUG00000004655	-	http://www.kegg.jp/kegg-bin/show_pathway?map05204/K01014%09%23FFFFFF,red/K07412%09%23FFFFFF,red/
ocu04971	Gastric acid secretion	Organismal Systems	Digestive system	2	0	2	52	0.328535519	ENSOCUG00000007904(ADCY9),ENSOCUG00000007797(CCKBR)	-	http://www.kegg.jp/kegg-bin/show_pathway?map04971/K08049%09%23FFFFFF,red/K04195%09%23FFFFFF,red/
ocu05133	Pertussis	Human Diseases	Infectious diseases: Bacterial	2	0	2	52	0.328535519	ENSOCUG00000014468(C1S),ENSOCUG00000014373	-	http://www.kegg.jp/kegg-bin/show_pathway?map05133/K04002%09%23FFFFFF,red/K01331%09%23FFFFFF,red/
ocu04918	Thyroid hormone synthesis	Organismal Systems	Endocrine system	1	1	2	53	0.336826353	ENSOCUG00000007904(ADCY9)	ENSOCUG00000012634(SLC26A4)	http://www.kegg.jp/kegg-bin/show_pathway?map04918/K08049%09%23FFFFFF,red/K14702%09%23FFFFFF,green/
ocu05168	Herpes simplex infection	Human Diseases	Infectious diseases: Viral	1	3	4	134	0.358051788	ENSOCUG00000010458(NECTIN1)	ENSOCUG00000027849(OAS3),ENSOCUG00000005445,ENSOCUG00000002863(IFIH1)	http://www.kegg.jp/kegg-bin/show_pathway?map05168/K14217%09%23FFFFFF,green/K06081%09%23FFFFFF,red/K14216%09%23FFFFFF,green/K12647%09%23FFFFFF,green/
ocu04211	Longevity regulating pathway	Organismal Systems	Aging	2	0	2	56	0.36150446	ENSOCUG00000007904(ADCY9),ENSOCUG00000014668(PPARGC1A)	-	http://www.kegg.jp/kegg-bin/show_pathway?map04211/K07202%09%23FFFFFF,red/K08049%09%23FFFFFF,red/
ocu04666	Fc gamma R-mediated phagocytosis	Organismal Systems	Immune system	1	1	2	56	0.36150446	ENSOCUG00000015811(PIP5K1B)	ENSOCUG00000008947(MARCKSL1)	http://www.kegg.jp/kegg-bin/show_pathway?map04666/K13536%09%23FFFFFF,green/K00889%09%23FFFFFF,red/
ocu04151	PI3K-Akt signaling pathway	Environmental Information Processing	Signal transduction	2	5	7	258	0.364211973	ENSOCUG00000008499(FGF10),ENSOCUG00000014367(SGK1)	ENSOCUG00000007086(KIT),ENSOCUG00000003792(THBS1),ENSOCUG00000022536(SPP1),ENSOCUG00000004013(LAMB3),ENSOCUG00000011124(FGF18)	http://www.kegg.jp/kegg-bin/show_pathway?map04151/K13302%09%23FFFFFF,red/K04358%09%23FFFFFF,purple/K06244%09%23FFFFFF,green/K05091%09%23FFFFFF,green/K16857%09%23FFFFFF,green/K06250%09%23FFFFFF,green/
ocu04115	p53 signaling pathway	Cellular Processes	Cell growth and death	1	1	2	57	0.369656712	ENSOCUG00000016787(SERPINB5)	ENSOCUG00000003792(THBS1)	http://www.kegg.jp/kegg-bin/show_pathway?map04115/K10139%09%23FFFFFF,red/K16857%09%23FFFFFF,green/
ocu00983	Drug metabolism - other enzymes	Metabolism	Xenobiotics biodegradation and metabolism	2	0	2	58	0.377767922	ENSOCUG00000001230(XDH),ENSOCUG00000003854(TPMT)	-	http://www.kegg.jp/kegg-bin/show_pathway?map00983/K00106%09%23FFFFFF,red/K00569%09%23FFFFFF,red/
ocu00790	Folate biosynthesis	Metabolism	Metabolism of cofactors and vitamins	1	0	1	21	0.381047872	ENSOCUG00000014890(PAH)	-	http://www.kegg.jp/kegg-bin/show_pathway?map00790/K00500%09%23FFFFFF,red/
ocu00350	Tyrosine metabolism	Metabolism	Amino acid metabolism	1	0	1	21	0.381047872	ENSOCUG00000013971(AOX1)	-	http://www.kegg.jp/kegg-bin/show_pathway?map00350/K00157%09%23FFFFFF,red/
ocu04371	Apelin signaling pathway	Environmental Information Processing	Signal transduction	2	1	3	98	0.381157059	ENSOCUG00000007904(ADCY9),ENSOCUG00000014668(PPARGC1A)	ENSOCUG00000022536(SPP1)	http://www.kegg.jp/kegg-bin/show_pathway?map04371/K07202%09%23FFFFFF,red/K08049%09%23FFFFFF,red/K06250%09%23FFFFFF,green/
ocu04550	Signaling pathways regulating pluripotency of stem cells	Cellular Processes	Cellular community - eukaryotes	2	1	3	99	0.387294564	ENSOCUG00000013432(WNT7A),ENSOCUG00000024007(WNT6)	ENSOCUG00000017283(SMARCAD1)	http://www.kegg.jp/kegg-bin/show_pathway?map04550/K00572%09%23FFFFFF,red/K00445%09%23FFFFFF,red/K14439%09%23FFFFFF,green/
ocu04310	Wnt signaling pathway	Environmental Information Processing	Signal transduction	2	1	3	101	0.39952544	ENSOCUG00000013432(WNT7A),ENSOCUG00000024007(WNT6)	ENSOCUG00000015329(MMP7)	http://www.kegg.jp/kegg-bin/show_pathway?map04310/K00572%09%23FFFFFF,red/K00445%09%23FFFFFF,red/K01397%09%23FFFFFF,green/
ocu00650	Butanoate metabolism	Metabolism	Carbohydrate metabolism	1	0	1	23	0.408722185	ENSOCUG00000009900(ACSM3)	-	http://www.kegg.jp/kegg-bin/show_pathway?map00650/K01896%09%23FFFFFF,red/
ocu00590	Arachidonic acid metabolism	Metabolism	Lipid metabolism	2	0	2	62	0.40975823	ENSOCUG00000012233(GGT5),ENSOCUG00000004655	-	http://www.kegg.jp/kegg-bin/show_pathway?map00590/K18592%09%23FFFFFF,red/K07412%09%23FFFFFF,red/
ocu05020	Prion diseases	Human Diseases	Neurodegenerative diseases	0	1	1	24	0.422093839	-	ENSOCUG00000006190(NCAM1)	http://www.kegg.jp/kegg-bin/show_pathway?map05020/K06491%09%23FFFFFF,green/
ocu00860	Porphyrin and chlorophyll metabolism	Metabolism	Metabolism of cofactors and vitamins	1	0	1	24	0.422093839	ENSOCUG00000010633(HMOX1)	-	http://www.kegg.jp/kegg-bin/show_pathway?map00860/K00510%09%23FFFFFF,red/
ocu04060	Cytokine-cytokine receptor interaction	Environmental Information Processing	Signaling molecules and interaction	2	3	5	189	0.423685763	ENSOCUG00000006248,ENSOCUG00000025061	ENSOCUG00000007482(CX3CL1),ENSOCUG00000005311(IL17RE),ENSOCUG00000025119(RELT)	http://www.kegg.jp/kegg-bin/show_pathway?map04060/K05168%09%23FFFFFF,green/K05156%09%23FFFFFF,green/K05074%09%23FFFFFF,red/K05508%09%23FFFFFF,green/K21097%09%23FFFFFF,red/
ocu04510	Focal adhesion	Cellular Processes	Cellular community - eukaryotes	0	4	4	147	0.424624356	-	ENSOCUG00000004013(LAMB3),ENSOCUG00000013064(TLN2),ENSOCUG00000003792(THBS1),ENSOCUG00000022536(SPP1)	http://www.kegg.jp/kegg-bin/show_pathway?map04510/K06244%09%23FFFFFF,green/K16857%09%23FFFFFF,green/K06271%09%23FFFFFF,green/K06250%09%23FFFFFF,green/
ocu04713	Circadian entrainment	Organismal Systems	Environmental adaptation	1	1	2	64	0.42545309	ENSOCUG00000007904(ADCY9)	ENSOCUG00000015565(KCNJ5)	http://www.kegg.jp/kegg-bin/show_pathway?map04713/K04999%09%23FFFFFF,green/K08049%09%23FFFFFF,red/
ocu04640	Hematopoietic cell lineage	Organismal Systems	Immune system	1	1	2	65	0.433219324	ENSOCUG00000002492(CD36)	ENSOCUG00000007086(KIT)	http://www.kegg.jp/kegg-bin/show_pathway?map04640/K06259%09%23FFFFFF,red/K05091%09%23FFFFFF,green/
ocu03410	Base excision repair	Genetic Information Processing	Replication and repair	0	1	1	25	0.435164415	-	ENSOCUG00000005022(APEX1)	http://www.kegg.jp/kegg-bin/show_pathway?map03410/K10771%09%23FFFFFF,green/
ocu04960	Aldosterone-regulated sodium reabsorption	Organismal Systems	Excretory system	1	0	1	25	0.435164415	ENSOCUG00000014367(SGK1)	-	http://www.kegg.jp/kegg-bin/show_pathway?map04960/K13302%09%23FFFFFF,red/
ocu04925	Aldosterone synthesis and secretion	Organismal Systems	Endocrine system	1	1	2	66	0.440929368	ENSOCUG00000007904(ADCY9)	ENSOCUG00000015565(KCNJ5)	http://www.kegg.jp/kegg-bin/show_pathway?map04925/K04999%09%23FFFFFF,green/K08049%09%23FFFFFF,red/
ocu04810	Regulation of actin cytoskeleton	Cellular Processes	Cell motility	3	1	4	151	0.444818481	ENSOCUG00000015811(PIP5K1B),ENSOCUG00000014828(BDKRB2),ENSOCUG00000008499(FGF10)	ENSOCUG00000011124(FGF18)	http://www.kegg.jp/kegg-bin/show_pathway?map04810/K04358%09%23FFFFFF,purple/K03916%09%23FFFFFF,red/K00889%09%23FFFFFF,red/
ocu00760	Nicotinate and nicotinamide metabolism	Metabolism	Metabolism of cofactors and vitamins	1	0	1	27	0.460429178	ENSOCUG00000013971(AOX1)	-	http://www.kegg.jp/kegg-bin/show_pathway?map00760/K00157%09%23FFFFFF,red/
ocu05322	Systemic lupus erythematosus	Human Diseases	Immune diseases	1	1	2	69	0.463708593	ENSOCUG00000014468(C1S)	ENSOCUG00000027587	http://www.kegg.jp/kegg-bin/show_pathway?map05322/K11253%09%23FFFFFF,green/K01331%09%23FFFFFF,red/
ocu05150	Staphylococcus aureus infection	Human Diseases	Infectious diseases: Bacterial	1	0	1	28	0.472636416	ENSOCUG00000014468(C1S)	-	http://www.kegg.jp/kegg-bin/show_pathway?map05150/K01331%09%23FFFFFF,red/
ocu05225	Hepatocellular carcinoma	Human Diseases	Cancers: Specific types	3	0	3	114	0.47700865	ENSOCUG00000013432(WNT7A),ENSOCUG00000024007(WNT6),ENSOCUG00000010633(HMOX1)	-	http://www.kegg.jp/kegg-bin/show_pathway?map05225/K00572%09%23FFFFFF,red/K00445%09%23FFFFFF,red/K00510%09%23FFFFFF,red/
ocu05166	HTLV-I infection	Human Diseases	Infectious diseases: Viral	2	2	4	158	0.479614384	ENSOCUG00000007904(ADCY9),ENSOCUG00000006248	ENSOCUG00000015329(MMP7),ENSOCUG00000013064(TLN2)	http://www.kegg.jp/kegg-bin/show_pathway?map05166/K08049%09%23FFFFFF,red/K05074%09%23FFFFFF,red/K01397%09%23FFFFFF,green/K06271%09%23FFFFFF,green/
ocu05160	Hepatitis C	Human Diseases	Infectious diseases: Viral	0	3	3	115	0.482787398	-	ENSOCUG00000011464(CLDN1),ENSOCUG00000027849(OAS3),ENSOCUG00000005445	http://www.kegg.jp/kegg-bin/show_pathway?map05160/K06087%09%23FFFFFF,green/K14217%09%23FFFFFF,green/K14216%09%23FFFFFF,green/
ocu05219	Bladder cancer	Human Diseases	Cancers: Specific types	0	1	1	29	0.484568683	-	ENSOCUG00000003792(THBS1)	http://www.kegg.jp/kegg-bin/show_pathway?map05219/K16857%09%23FFFFFF,green/
ocu04340	Hedgehog signaling pathway	Environmental Information Processing	Signal transduction	0	1	1	29	0.484568683	-	ENSOCUG00000025655(GPR161)	http://www.kegg.jp/kegg-bin/show_pathway?map04340/K08439%09%23FFFFFF,green/
ocu04962	Vasopressin-regulated water reabsorption	Organismal Systems	Excretory system	1	0	1	30	0.496232145	ENSOCUG00000007904(ADCY9)	-	http://www.kegg.jp/kegg-bin/show_pathway?map04962/K08049%09%23FFFFFF,red/
ocu05231	Choline metabolism in cancer	Human Diseases	Cancers: Overview	2	0	2	74	0.500434666	ENSOCUG00000015811(PIP5K1B),ENSOCUG00000005238(DGKG)	-	http://www.kegg.jp/kegg-bin/show_pathway?map05231/K00901%09%23FFFFFF,red/K00889%09%23FFFFFF,red/
ocu04750	Inflammatory mediator regulation of TRP channels	Organismal Systems	Sensory system	2	0	2	75	0.507585341	ENSOCUG00000007904(ADCY9),ENSOCUG00000014828(BDKRB2)	-	http://www.kegg.jp/kegg-bin/show_pathway?map04750/K08049%09%23FFFFFF,red/K03916%09%23FFFFFF,red/
ocu04672	Intestinal immune network for IgA production	Organismal Systems	Immune system	1	0	1	32	0.518776638	ENSOCUG00000006248	-	http://www.kegg.jp/kegg-bin/show_pathway?map04672/K05074%09%23FFFFFF,red/
ocu04062	Chemokine signaling pathway	Organismal Systems	Immune system	2	1	3	122	0.522355089	ENSOCUG00000007904(ADCY9),ENSOCUG00000025061	ENSOCUG00000007482(CX3CL1)	http://www.kegg.jp/kegg-bin/show_pathway?map04062/K08049%09%23FFFFFF,red/K05508%09%23FFFFFF,green/K21097%09%23FFFFFF,red/
ocu04010	MAPK signaling pathway	Environmental Information Processing	Signal transduction	1	4	5	213	0.528034049	ENSOCUG00000008499(FGF10)	ENSOCUG00000007086(KIT),ENSOCUG00000008012,ENSOCUG00000006493,ENSOCUG00000011124(FGF18)	http://www.kegg.jp/kegg-bin/show_pathway?map04010/K04358%09%23FFFFFF,purple/K05091%09%23FFFFFF,green/K04381%09%23FFFFFF,green/
ocu04216	Ferroptosis	Cellular Processes	Cell growth and death	1	0	1	33	0.529669325	ENSOCUG00000010633(HMOX1)	-	http://www.kegg.jp/kegg-bin/show_pathway?map04216/K00510%09%23FFFFFF,red/
ocu04014	Ras signaling pathway	Environmental Information Processing	Signal transduction	2	2	4	170	0.537154883	ENSOCUG00000008499(FGF10),ENSOCUG00000016581	ENSOCUG00000007086(KIT),ENSOCUG00000011124(FGF18)	http://www.kegg.jp/kegg-bin/show_pathway?map04014/K04358%09%23FFFFFF,purple/K05091%09%23FFFFFF,green/K07834%09%23FFFFFF,red/
ocu04923	Regulation of lipolysis in adipocytes	Organismal Systems	Endocrine system	1	0	1	34	0.540316528	ENSOCUG00000007904(ADCY9)	-	http://www.kegg.jp/kegg-bin/show_pathway?map04923/K08049%09%23FFFFFF,red/
ocu00071	Fatty acid degradation	Metabolism	Lipid metabolism	0	1	1	34	0.540316528	-	ENSOCUG00000024977(ACSBG1)	http://www.kegg.jp/kegg-bin/show_pathway?map00071/K15013%09%23FFFFFF,green/
ocu04066	HIF-1 signaling pathway	Environmental Information Processing	Signal transduction	1	1	2	80	0.542326888	ENSOCUG00000010633(HMOX1)	ENSOCUG00000013396(EDN1)	http://www.kegg.jp/kegg-bin/show_pathway?map04066/K16366%09%23FFFFFF,green/K00510%09%23FFFFFF,red/
ocu00190	Oxidative phosphorylation	Metabolism	Energy metabolism	1	1	2	81	0.549069179	ENSOCUG00000016298(ATP6V1H)	ENSOCUG00000007374(ATP12A)	http://www.kegg.jp/kegg-bin/show_pathway?map00190/K01544%09%23FFFFFF,green/K02144%09%23FFFFFF,red/
ocu04070	Phosphatidylinositol signaling system	Environmental Information Processing	Signal transduction	2	0	2	81	0.549069179	ENSOCUG00000015811(PIP5K1B),ENSOCUG00000005238(DGKG)	-	http://www.kegg.jp/kegg-bin/show_pathway?map04070/K00901%09%23FFFFFF,red/K00889%09%23FFFFFF,red/
ocu04668	TNF signaling pathway	Environmental Information Processing	Signal transduction	0	2	2	81	0.549069179	-	ENSOCUG00000007482(CX3CL1),ENSOCUG00000013396(EDN1)	http://www.kegg.jp/kegg-bin/show_pathway?map04668/K16366%09%23FFFFFF,green/K05508%09%23FFFFFF,green/
ocu04611	Platelet activation	Organismal Systems	Immune system	1	1	2	82	0.555741843	ENSOCUG00000007904(ADCY9)	ENSOCUG00000013064(TLN2)	http://www.kegg.jp/kegg-bin/show_pathway?map04611/K08049%09%23FFFFFF,red/K06271%09%23FFFFFF,green/
ocu00380	Tryptophan metabolism	Metabolism	Amino acid metabolism	1	0	1	36	0.56089639	ENSOCUG00000013971(AOX1)	-	http://www.kegg.jp/kegg-bin/show_pathway?map00380/K00157%09%23FFFFFF,red/
ocu04979	Cholesterol metabolism	Organismal Systems	Digestive system	1	0	1	36	0.56089639	ENSOCUG00000002492(CD36)	-	http://www.kegg.jp/kegg-bin/show_pathway?map04979/K06259%09%23FFFFFF,red/
ocu04913	Ovarian steroidogenesis	Organismal Systems	Endocrine system	1	0	1	36	0.56089639	ENSOCUG00000007904(ADCY9)	-	http://www.kegg.jp/kegg-bin/show_pathway?map04913/K08049%09%23FFFFFF,red/
ocu04213	Longevity regulating pathway - multiple species	Organismal Systems	Aging	1	0	1	37	0.570839698	ENSOCUG00000007904(ADCY9)	-	http://www.kegg.jp/kegg-bin/show_pathway?map04213/K08049%09%23FFFFFF,red/
ocu00600	Sphingolipid metabolism	Metabolism	Lipid metabolism	1	0	1	37	0.570839698	ENSOCUG00000009998(SGMS2)	-	http://www.kegg.jp/kegg-bin/show_pathway?map00600/K04714%09%23FFFFFF,red/
ocu00982	Drug metabolism - cytochrome P450	Metabolism	Xenobiotics biodegradation and metabolism	1	0	1	38	0.580558828	ENSOCUG00000013971(AOX1)	-	http://www.kegg.jp/kegg-bin/show_pathway?map00982/K00157%09%23FFFFFF,red/
ocu00330	Arginine and proline metabolism	Metabolism	Amino acid metabolism	1	0	1	39	0.59005881	ENSOCUG00000013547(OAT)	-	http://www.kegg.jp/kegg-bin/show_pathway?map00330/K00819%09%23FFFFFF,red/
ocu04975	Fat digestion and absorption	Organismal Systems	Digestive system	1	0	1	39	0.59005881	ENSOCUG00000002492(CD36)	-	http://www.kegg.jp/kegg-bin/show_pathway?map04975/K06259%09%23FFFFFF,red/
ocu04152	AMPK signaling pathway	Environmental Information Processing	Signal transduction	2	0	2	88	0.594302025	ENSOCUG00000002492(CD36),ENSOCUG00000014668(PPARGC1A)	-	http://www.kegg.jp/kegg-bin/show_pathway?map04152/K07202%09%23FFFFFF,red/K06259%09%23FFFFFF,red/
ocu00520	Amino sugar and nucleotide sugar metabolism	Metabolism	Carbohydrate metabolism	1	0	1	40	0.599344564	ENSOCUG00000016591(GFPT2)	-	http://www.kegg.jp/kegg-bin/show_pathway?map00520/K00820%09%23FFFFFF,red/
ocu00480	Glutathione metabolism	Metabolism	Metabolism of other amino acids	1	0	1	40	0.599344564	ENSOCUG00000012233(GGT5)	-	http://www.kegg.jp/kegg-bin/show_pathway?map00480/K18592%09%23FFFFFF,red/
ocu00280	Valine, leucine and isoleucine degradation	Metabolism	Amino acid metabolism	1	0	1	41	0.608420901	ENSOCUG00000013971(AOX1)	-	http://www.kegg.jp/kegg-bin/show_pathway?map00280/K00157%09%23FFFFFF,red/
ocu04071	Sphingolipid signaling pathway	Environmental Information Processing	Signal transduction	2	0	2	92	0.618595034	ENSOCUG00000014828(BDKRB2),ENSOCUG00000009998(SGMS2)	-	http://www.kegg.jp/kegg-bin/show_pathway?map04071/K04714%09%23FFFFFF,red/K03916%09%23FFFFFF,red/
ocu00140	Steroid hormone biosynthesis	Metabolism	Lipid metabolism	1	0	1	43	0.625964025	ENSOCUG00000004655	-	http://www.kegg.jp/kegg-bin/show_pathway?map00140/K07412%09%23FFFFFF,red/
ocu04915	Estrogen signaling pathway	Organismal Systems	Endocrine system	1	1	2	94	0.630317727	ENSOCUG00000007904(ADCY9)	ENSOCUG00000015565(KCNJ5)	http://www.kegg.jp/kegg-bin/show_pathway?map04915/K04999%09%23FFFFFF,green/K08049%09%23FFFFFF,red/
ocu04730	Long-term depression	Organismal Systems	Nervous system	1	0	1	44	0.634439903	ENSOCUG00000004912(GNAZ)	-	http://www.kegg.jp/kegg-bin/show_pathway?map04730/K04535%09%23FFFFFF,red/
ocu04924	Renin secretion	Organismal Systems	Endocrine system	1	0	1	45	0.642724551	ENSOCUG00000009113(PDE1C)	-	http://www.kegg.jp/kegg-bin/show_pathway?map04924/K13755%09%23FFFFFF,red/
ocu04926	Relaxin signaling pathway	Organismal Systems	Endocrine system	1	1	2	97	0.647375132	ENSOCUG00000007904(ADCY9)	ENSOCUG00000013396(EDN1)	http://www.kegg.jp/kegg-bin/show_pathway?map04926/K16366%09%23FFFFFF,green/K08049%09%23FFFFFF,red/
ocu04270	Vascular smooth muscle contraction	Organismal Systems	Circulatory system	1	1	2	97	0.647375132	ENSOCUG00000007904(ADCY9)	ENSOCUG00000013396(EDN1)	http://www.kegg.jp/kegg-bin/show_pathway?map04270/K16366%09%23FFFFFF,green/K08049%09%23FFFFFF,red/
ocu05221	Acute myeloid leukemia	Human Diseases	Cancers: Specific types	0	1	1	46	0.650822264	-	ENSOCUG00000007086(KIT)	http://www.kegg.jp/kegg-bin/show_pathway?map05221/K05091%09%23FFFFFF,green/
ocu04721	Synaptic vesicle cycle	Organismal Systems	Nervous system	1	0	1	46	0.650822264	ENSOCUG00000016298(ATP6V1H)	-	http://www.kegg.jp/kegg-bin/show_pathway?map04721/K02144%09%23FFFFFF,red/
ocu04142	Lysosome	Cellular Processes	Transport and catabolism	1	1	2	98	0.652921342	ENSOCUG00000016298(ATP6V1H)	ENSOCUG00000015837	http://www.kegg.jp/kegg-bin/show_pathway?map04142/K12383%09%23FFFFFF,green/K02144%09%23FFFFFF,red/
ocu05230	Central carbon metabolism in cancer	Human Diseases	Cancers: Overview	0	1	1	47	0.658737242	-	ENSOCUG00000007086(KIT)	http://www.kegg.jp/kegg-bin/show_pathway?map05230/K05091%09%23FFFFFF,green/
ocu04622	RIG-I-like receptor signaling pathway	Organismal Systems	Immune system	0	1	1	48	0.666473591	-	ENSOCUG00000002863(IFIH1)	http://www.kegg.jp/kegg-bin/show_pathway?map04622/K12647%09%23FFFFFF,green/
ocu05418	Fluid shear stress and atherosclerosis	Human Diseases	Cardiovascular diseases	1	1	2	102	0.674415518	ENSOCUG00000010633(HMOX1)	ENSOCUG00000013396(EDN1)	http://www.kegg.jp/kegg-bin/show_pathway?map05418/K16366%09%23FFFFFF,green/K00510%09%23FFFFFF,red/
ocu04621	NOD-like receptor signaling pathway	Organismal Systems	Immune system	0	2	2	103	0.679618016	-	ENSOCUG00000027849(OAS3),ENSOCUG00000007503	http://www.kegg.jp/kegg-bin/show_pathway?map04621/K04394%09%23FFFFFF,green/K14216%09%23FFFFFF,green/
ocu04921	Oxytocin signaling pathway	Organismal Systems	Endocrine system	1	1	2	103	0.679618016	ENSOCUG00000007904(ADCY9)	ENSOCUG00000015565(KCNJ5)	http://www.kegg.jp/kegg-bin/show_pathway?map04921/K04999%09%23FFFFFF,green/K08049%09%23FFFFFF,red/
ocu05205	Proteoglycans in cancer	Human Diseases	Cancers: Overview	2	1	3	155	0.683961199	ENSOCUG00000013432(WNT7A),ENSOCUG00000024007(WNT6)	ENSOCUG00000003792(THBS1)	http://www.kegg.jp/kegg-bin/show_pathway?map05205/K00572%09%23FFFFFF,red/K00445%09%23FFFFFF,red/K16857%09%23FFFFFF,green/
ocu05140	Leishmaniasis	Human Diseases	Infectious diseases: Parasitic	0	1	1	52	0.695711627	-	ENSOCUG00000008947(MARCKSL1)	http://www.kegg.jp/kegg-bin/show_pathway?map05140/K13536%09%23FFFFFF,green/
ocu00240	Pyrimidine metabolism	Metabolism	Nucleotide metabolism	0	1	1	52	0.695711627	-	ENSOCUG00000010021(CMPK2)	http://www.kegg.jp/kegg-bin/show_pathway?map00240/K13809%09%23FFFFFF,green/
ocu04390	Hippo signaling pathway	Environmental Information Processing	Signal transduction	2	0	2	107	0.699755001	ENSOCUG00000013432(WNT7A),ENSOCUG00000024007(WNT6)	-	http://www.kegg.jp/kegg-bin/show_pathway?map04390/K00572%09%23FFFFFF,red/K00445%09%23FFFFFF,red/
ocu04911	Insulin secretion	Organismal Systems	Endocrine system	1	0	1	55	0.715952487	ENSOCUG00000007904(ADCY9)	-	http://www.kegg.jp/kegg-bin/show_pathway?map04911/K08049%09%23FFFFFF,red/
ocu04520	Adherens junction	Cellular Processes	Cellular community - eukaryotes	1	0	1	56	0.722396996	ENSOCUG00000010458(NECTIN1)	-	http://www.kegg.jp/kegg-bin/show_pathway?map04520/K06081%09%23FFFFFF,red/
ocu04144	Endocytosis	Cellular Processes	Transport and catabolism	3	0	3	168	0.735338006	ENSOCUG00000012721(DAB2),ENSOCUG00000010020(DNAJC6),ENSOCUG00000015811(PIP5K1B)	-	http://www.kegg.jp/kegg-bin/show_pathway?map04144/K09526%09%23FFFFFF,red/K12475%09%23FFFFFF,red/K00889%09%23FFFFFF,red/
ocu05202	Transcriptional misregulation in cancer	Human Diseases	Cancers: Overview	1	1	2	115	0.736890152	ENSOCUG00000016719	ENSOCUG00000027587	http://www.kegg.jp/kegg-bin/show_pathway?map05202/K08024%09%23FFFFFF,red/K11253%09%23FFFFFF,green/
ocu04022	cGMP-PKG signaling pathway	Environmental Information Processing	Signal transduction	2	0	2	115	0.736890152	ENSOCUG00000007904(ADCY9),ENSOCUG00000014828(BDKRB2)	-	http://www.kegg.jp/kegg-bin/show_pathway?map04022/K08049%09%23FFFFFF,red/K03916%09%23FFFFFF,red/
ocu05212	Pancreatic cancer	Human Diseases	Cancers: Specific types	1	0	1	59	0.740870092	ENSOCUG00000016581	-	http://www.kegg.jp/kegg-bin/show_pathway?map05212/K07834%09%23FFFFFF,red/
ocu04630	Jak-STAT signaling pathway	Environmental Information Processing	Signal transduction	2	0	2	116	0.741247243	ENSOCUG00000013971(AOX1),ENSOCUG00000006248	-	http://www.kegg.jp/kegg-bin/show_pathway?map04630/K05074%09%23FFFFFF,red/K00157%09%23FFFFFF,red/
ocu00562	Inositol phosphate metabolism	Metabolism	Carbohydrate metabolism	1	0	1	61	0.752500296	ENSOCUG00000015811(PIP5K1B)	-	http://www.kegg.jp/kegg-bin/show_pathway?map00562/K00889%09%23FFFFFF,red/
ocu01522	Endocrine resistance	Human Diseases	Drug resistance: Antineoplastic	1	0	1	62	0.758119018	ENSOCUG00000007904(ADCY9)	-	http://www.kegg.jp/kegg-bin/show_pathway?map01522/K08049%09%23FFFFFF,red/
ocu04912	GnRH signaling pathway	Organismal Systems	Endocrine system	1	0	1	62	0.758119018	ENSOCUG00000007904(ADCY9)	-	http://www.kegg.jp/kegg-bin/show_pathway?map04912/K08049%09%23FFFFFF,red/
ocu05414	Dilated cardiomyopathy (DCM)	Human Diseases	Cardiovascular diseases	1	0	1	64	0.768978323	ENSOCUG00000007904(ADCY9)	-	http://www.kegg.jp/kegg-bin/show_pathway?map05414/K08049%09%23FFFFFF,red/
ocu05164	Influenza A	Human Diseases	Infectious diseases: Viral	0	2	2	123	0.770054426	-	ENSOCUG00000027849(OAS3),ENSOCUG00000002863(IFIH1)	http://www.kegg.jp/kegg-bin/show_pathway?map05164/K14216%09%23FFFFFF,green/K12647%09%23FFFFFF,green/
ocu04914	Progesterone-mediated oocyte maturation	Organismal Systems	Endocrine system	1	0	1	65	0.774224557	ENSOCUG00000007904(ADCY9)	-	http://www.kegg.jp/kegg-bin/show_pathway?map04914/K08049%09%23FFFFFF,red/
ocu04540	Gap junction	Cellular Processes	Cellular community - eukaryotes	1	0	1	66	0.779352175	ENSOCUG00000007904(ADCY9)	-	http://www.kegg.jp/kegg-bin/show_pathway?map04540/K08049%09%23FFFFFF,red/
ocu05410	Hypertrophic cardiomyopathy (HCM)	Human Diseases	Cardiovascular diseases	0	1	1	66	0.779352175	-	ENSOCUG00000013396(EDN1)	http://www.kegg.jp/kegg-bin/show_pathway?map05410/K16366%09%23FFFFFF,green/
ocu04146	Peroxisome	Cellular Processes	Transport and catabolism	1	0	1	66	0.779352175	ENSOCUG00000001230(XDH)	-	http://www.kegg.jp/kegg-bin/show_pathway?map04146/K00106%09%23FFFFFF,red/
ocu05146	Amoebiasis	Human Diseases	Infectious diseases: Parasitic	0	1	1	67	0.784363848	-	ENSOCUG00000004013(LAMB3)	http://www.kegg.jp/kegg-bin/show_pathway?map05146/K06244%09%23FFFFFF,green/
ocu04064	NF-kappa B signaling pathway	Environmental Information Processing	Signal transduction	1	0	1	67	0.784363848	ENSOCUG00000003517(CARD10)	-	http://www.kegg.jp/kegg-bin/show_pathway?map04064/K20912%09%23FFFFFF,green/
ocu05152	Tuberculosis	Human Diseases	Infectious diseases: Bacterial	2	0	2	128	0.788891394	ENSOCUG00000010890,ENSOCUG00000016298(ATP6V1H)	-	http://www.kegg.jp/kegg-bin/show_pathway?map05152/K06563%09%23FFFFFF,red/K02144%09%23FFFFFF,red/
ocu04625	C-type lectin receptor signaling pathway	Organismal Systems	Immune system	1	0	1	68	0.789262184	ENSOCUG00000010890	-	http://www.kegg.jp/kegg-bin/show_pathway?map04625/K06563%09%23FFFFFF,red/
ocu05323	Rheumatoid arthritis	Human Diseases	Immune diseases	1	0	1	69	0.794049737	ENSOCUG00000016298(ATP6V1H)	-	http://www.kegg.jp/kegg-bin/show_pathway?map05323/K02144%09%23FFFFFF,red/
ocu04620	Toll-like receptor signaling pathway	Organismal Systems	Immune system	0	1	1	70	0.798729001	-	ENSOCUG00000022536(SPP1)	http://www.kegg.jp/kegg-bin/show_pathway?map04620/K06250%09%23FFFFFF,green/
ocu04922	Glucagon signaling pathway	Organismal Systems	Endocrine system	1	0	1	70	0.798729001	ENSOCUG00000014668(PPARGC1A)	-	http://www.kegg.jp/kegg-bin/show_pathway?map04922/K07202%09%23FFFFFF,red/
ocu05210	Colorectal cancer	Human Diseases	Cancers: Specific types	1	0	1	72	0.80777236	ENSOCUG00000016581	-	http://www.kegg.jp/kegg-bin/show_pathway?map05210/K07834%09%23FFFFFF,red/
ocu05142	Chagas disease (American trypanosomiasis)	Human Diseases	Infectious diseases: Parasitic	1	0	1	73	0.81214117	ENSOCUG00000014828(BDKRB2)	-	http://www.kegg.jp/kegg-bin/show_pathway?map05142/K03916%09%23FFFFFF,red/
ocu04024	cAMP signaling pathway	Environmental Information Processing	Signal transduction	1	1	2	135	0.812983367	ENSOCUG00000007904(ADCY9)	ENSOCUG00000003473(VIPR2)	http://www.kegg.jp/kegg-bin/show_pathway?map04024/K04590%09%23FFFFFF,green/K08049%09%23FFFFFF,red/
ocu04919	Thyroid hormone signaling pathway	Organismal Systems	Endocrine system	1	0	1	74	0.816411122	ENSOCUG00000000098(SLC16A10)	-	http://www.kegg.jp/kegg-bin/show_pathway?map04919/K08187%09%23FFFFFF,red/
ocu04933	AGE-RAGE signaling pathway in diabetic complications	Human Diseases	Endocrine and metabolic diseases	0	1	1	75	0.820584443	-	ENSOCUG00000013396(EDN1)	http://www.kegg.jp/kegg-bin/show_pathway?map04933/K16366%09%23FFFFFF,green/
ocu04714	Thermogenesis	Organismal Systems	Environmental adaptation	2	0	2	138	0.822538855	ENSOCUG00000007904(ADCY9),ENSOCUG00000014668(PPARGC1A)	-	http://www.kegg.jp/kegg-bin/show_pathway?map04714/K07202%09%23FFFFFF,red/K08049%09%23FFFFFF,red/
ocu00564	Glycerophospholipid metabolism	Metabolism	Lipid metabolism	1	0	1	76	0.824663311	ENSOCUG00000005238(DGKG)	-	http://www.kegg.jp/kegg-bin/show_pathway?map00564/K00901%09%23FFFFFF,red/
ocu04928	Parathyroid hormone synthesis, secretion and action	Organismal Systems	Endocrine system	1	0	1	78	0.832546152	ENSOCUG00000007904(ADCY9)	-	http://www.kegg.jp/kegg-bin/show_pathway?map04928/K08049%09%23FFFFFF,red/
ocu04725	Cholinergic synapse	Organismal Systems	Nervous system	1	0	1	78	0.832546152	ENSOCUG00000007904(ADCY9)	-	http://www.kegg.jp/kegg-bin/show_pathway?map04725/K08049%09%23FFFFFF,red/
ocu05222	Small cell lung cancer	Human Diseases	Cancers: Specific types	0	1	1	79	0.836354239	-	ENSOCUG00000004013(LAMB3)	http://www.kegg.jp/kegg-bin/show_pathway?map05222/K06244%09%23FFFFFF,green/
ocu04724	Glutamatergic synapse	Organismal Systems	Nervous system	1	0	1	79	0.836354239	ENSOCUG00000007904(ADCY9)	-	http://www.kegg.jp/kegg-bin/show_pathway?map04724/K08049%09%23FFFFFF,red/
ocu04670	Leukocyte transendothelial migration	Organismal Systems	Immune system	0	1	1	83	0.850743586	-	ENSOCUG00000011464(CLDN1)	http://www.kegg.jp/kegg-bin/show_pathway?map04670/K06087%09%23FFFFFF,green/
ocu04114	Oocyte meiosis	Cellular Processes	Cell growth and death	1	0	1	85	0.857458618	ENSOCUG00000007904(ADCY9)	-	http://www.kegg.jp/kegg-bin/show_pathway?map04114/K08049%09%23FFFFFF,red/
ocu04110	Cell cycle	Cellular Processes	Cell growth and death	1	0	1	90	0.872959298	ENSOCUG00000012890	-	http://www.kegg.jp/kegg-bin/show_pathway?map04110/K04682%09%23FFFFFF,red/
ocu04910	Insulin signaling pathway	Organismal Systems	Endocrine system	1	0	1	90	0.872959298	ENSOCUG00000014668(PPARGC1A)	-	http://www.kegg.jp/kegg-bin/show_pathway?map04910/K07202%09%23FFFFFF,red/
ocu05145	Toxoplasmosis	Human Diseases	Infectious diseases: Parasitic	0	1	1	91	0.875851869	-	ENSOCUG00000004013(LAMB3)	http://www.kegg.jp/kegg-bin/show_pathway?map05145/K06244%09%23FFFFFF,green/
ocu04068	FoxO signaling pathway	Environmental Information Processing	Signal transduction	1	0	1	93	0.881441773	ENSOCUG00000014367(SGK1)	-	http://www.kegg.jp/kegg-bin/show_pathway?map04068/K13302%09%23FFFFFF,red/
ocu04728	Dopaminergic synapse	Organismal Systems	Nervous system	0	1	1	95	0.886781058	-	ENSOCUG00000015565(KCNJ5)	http://www.kegg.jp/kegg-bin/show_pathway?map04728/K04999%09%23FFFFFF,green/
ocu04261	Adrenergic signaling in cardiomyocytes	Organismal Systems	Circulatory system	1	0	1	100	0.899105018	ENSOCUG00000007904(ADCY9)	-	http://www.kegg.jp/kegg-bin/show_pathway?map04261/K08049%09%23FFFFFF,red/
ocu05034	Alcoholism	Human Diseases	Substance dependence	0	1	1	106	0.91214305	-	ENSOCUG00000027587	http://www.kegg.jp/kegg-bin/show_pathway?map05034/K11253%09%23FFFFFF,green/
ocu05161	Hepatitis B	Human Diseases	Infectious diseases: Viral	0	1	1	111	0.921716564	-	ENSOCUG00000002863(IFIH1)	http://www.kegg.jp/kegg-bin/show_pathway?map05161/K12647%09%23FFFFFF,green/
ocu04218	Cellular senescence	Cellular Processes	Cell growth and death	1	0	1	113	0.925248459	ENSOCUG00000012890	-	http://www.kegg.jp/kegg-bin/show_pathway?map04218/K04682%09%23FFFFFF,red/
ocu04141	Protein processing in endoplasmic reticulum	Genetic Information Processing	Folding, sorting and degradation	1	0	1	114	0.926954454	ENSOCUG00000000152(EDEM3)	-	http://www.kegg.jp/kegg-bin/show_pathway?map04141/K10086%09%23FFFFFF,red/
ocu04530	Tight junction	Cellular Processes	Cellular community - eukaryotes	0	1	1	119	0.934920206	-	ENSOCUG00000011464(CLDN1)	http://www.kegg.jp/kegg-bin/show_pathway?map04530/K06087%09%23FFFFFF,green/
ocu05016	Huntington's disease	Human Diseases	Neurodegenerative diseases	1	0	1	128	0.947141438	ENSOCUG00000014668(PPARGC1A)	-	http://www.kegg.jp/kegg-bin/show_pathway?map05016/K07202%09%23FFFFFF,red/
ocu05169	Epstein-Barr virus infection	Human Diseases	Infectious diseases: Viral	0	1	1	146	0.96515009	-	ENSOCUG00000027849(OAS3)	http://www.kegg.jp/kegg-bin/show_pathway?map05169/K14216%09%23FFFFFF,green/
ocu04740	Olfactory transduction	Organismal Systems	Sensory system	1	0	1	436	0.99996197	ENSOCUG00000009113(PDE1C)	-	http://www.kegg.jp/kegg-bin/show_pathway?map04740/K13755%09%23FFFFFF,red/
